# Supplementary material for: Uncovering the role of Symbiodiniaceae assemblage composition and abundance in coral bleaching response by minimizing sampling and evolutionary biases
Source: Springer Nature journal article supplement (doi:10.1186/s12866-020-01765-z), 2020-05-19

### ITS Primers used in this study (15,566 records)

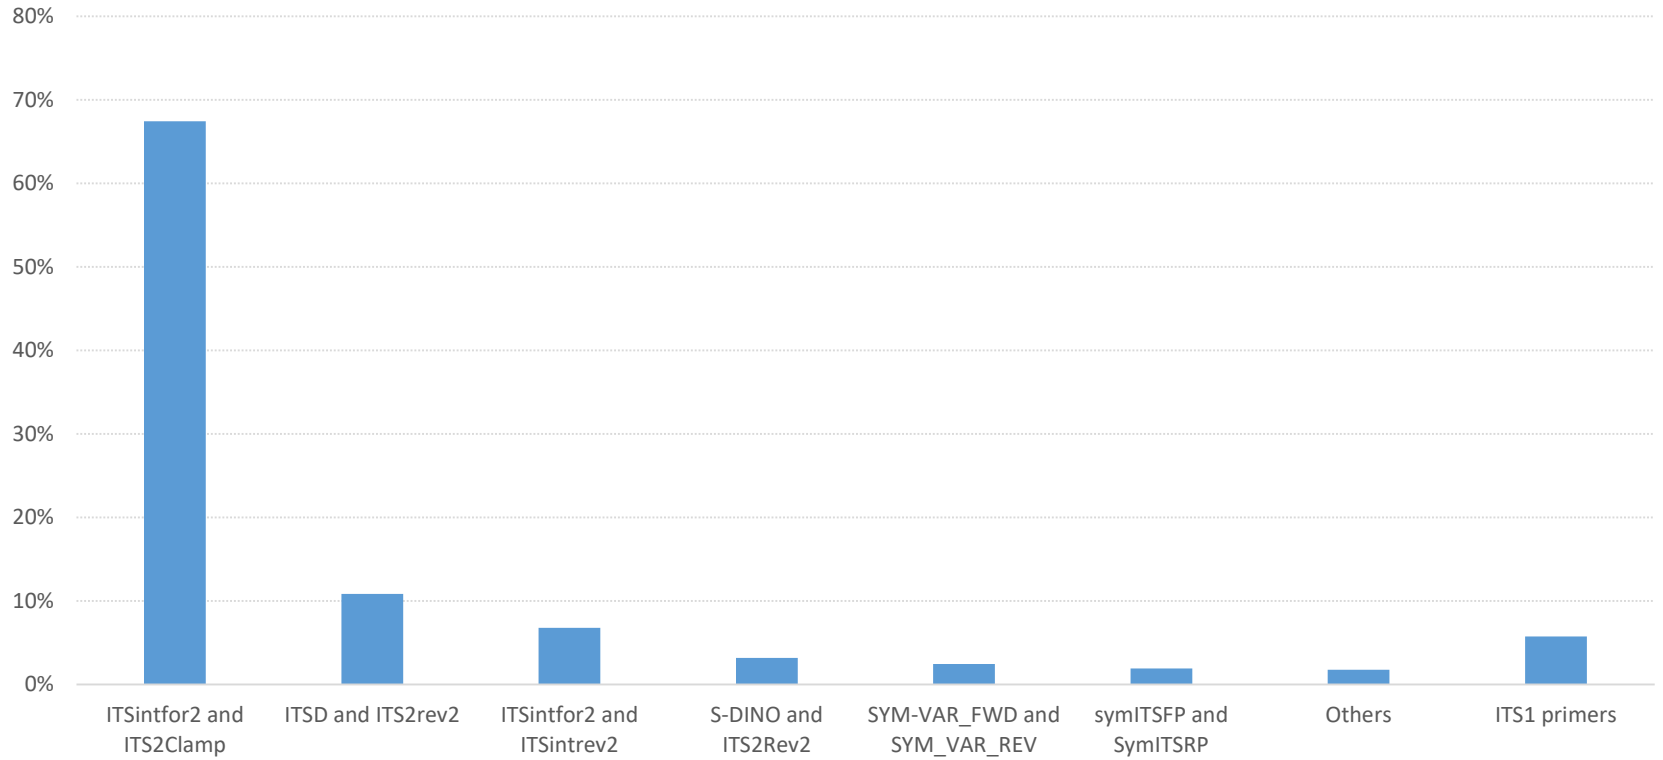

Supplement: 12866_2020_1765_MOESM5_ESM.pdf [file 12866_2020_1765_MOESM5_ESM.pdf]
