# Supplementary material for: Uncovering the role of Symbiodiniaceae assemblage composition and abundance in coral bleaching response by minimizing sampling and evolutionary biases
Source: BMC Microbiol. 2020 May 19;20:124. doi: 10.1186/s12866-020-01765-z (PMC7236918; doi:10.1186/s12866-020-01765-z)
Supplement: Supplementary file 1 — Additional file 1: Table S1. Dataset of interaction between 123 coral species and 377 phylotypes (15,566 records) and their associated biogeographic information. Symbiodiniaceae phylotypes are listed by their new genus name [4] and their earlier ITS2 alphanumerical designation. Methodological details such as technical approaches and primers used are listed per publication, and additional notes on the protocols are provided. [file 12866_2020_1765_MOESM1_ESM.xlsx]

## Sheet: Sheet1
Unique record ID	Coral species	Phylo ID gene	Revised Taxon name at genus level (LaJeunesse et al., 2018 Curr Biol) FINAL	ITS2 Phylotype originally reported	Potential IGV	Sampling Location	Realm (Spalding 2007)	Province (Spalding 2007)	Ecoregion (Spalding 2007)	Min Depth (m)	Max Depth (m)	Lat	Long	Database OLD	Database	Phylotype ID Methods	Survey begin mo	Survey begin year	Survey end mo	Survey end year	Citation	comments (authors' notes)		ITS1 Primers	ITS2 Primers
1344	Acropora aspera	ITS2	Cladocopium C3	C3		Heron Island, GBR	Central Indo-Pacific	Northeast Australian Shelf	Central and Southern GBR	0.1	3	-23.44	151.91	GenBank	GenBank	Cloning of LSU, ITS2 & sequencing	1	2002	1	2002	Dove 2004 MEPS Scleractinian corals with photoprotective host pigments are hypersensitive to thermal bleaching	ITS2 primers: ITSintfor2 and ITS-Reverse, ITS2 was cloned and sequenced.			ITSintfor2 and ITS-Reverse
1345	Acropora aspera	ITS2	Cladocopium C3	C3		Heron Island, GBR	Central Indo-Pacific	Northeast Australian Shelf	Central and Southern GBR	0.1	3	-23.44	151.91	GenBank	GenBank	Cloning of LSU, ITS2 & sequencing	1	2002	1	2002	Dove 2004 MEPS Scleractinian corals with photoprotective host pigments are hypersensitive to thermal bleaching	ITS2 primers: ITSintfor2 and ITS-Reverse, ITS2 was cloned and sequenced.			ITSintfor2 and ITS-Reverse
1346	Acropora aspera	ITS2	Cladocopium C3	C3		Heron Island, GBR	Central Indo-Pacific	Northeast Australian Shelf	Central and Southern GBR	0.1	3	-23.44	151.91	GenBank	GenBank	Cloning of LSU, ITS2 & sequencing	1	2002	1	2002	Dove 2004 MEPS Scleractinian corals with photoprotective host pigments are hypersensitive to thermal bleaching	ITS2 primers: ITSintfor2 and ITS-Reverse, ITS2 was cloned and sequenced.			ITSintfor2 and ITS-Reverse
1347	Acropora aspera	ITS2	Cladocopium C3	C3		Heron Island, GBR	Central Indo-Pacific	Northeast Australian Shelf	Central and Southern GBR	0.1	3	-23.44	151.91	GenBank	GenBank	Cloning of LSU, ITS2 & sequencing	1	2002	1	2002	Dove 2004 MEPS Scleractinian corals with photoprotective host pigments are hypersensitive to thermal bleaching	ITS2 primers: ITSintfor2 and ITS-Reverse, ITS2 was cloned and sequenced.			ITSintfor2 and ITS-Reverse
1348	Acropora aspera	ITS2	Cladocopium C3	C3		Heron Island, GBR	Central Indo-Pacific	Northeast Australian Shelf	Central and Southern GBR	0.1	3	-23.44	151.91	GenBank	GenBank	Cloning of LSU, ITS2 & sequencing	1	2002	1	2002	Dove 2004 MEPS Scleractinian corals with photoprotective host pigments are hypersensitive to thermal bleaching	ITS2 primers: ITSintfor2 and ITS-Reverse, ITS2 was cloned and sequenced.			ITSintfor2 and ITS-Reverse
1349	Acropora aspera	ITS2	Cladocopium C3	C3		Heron Island, GBR	Central Indo-Pacific	Northeast Australian Shelf	Central and Southern GBR	0.1	3	-23.44	151.91	GenBank	GenBank	Cloning of LSU, ITS2 & sequencing	1	2002	1	2002	Dove 2004 MEPS Scleractinian corals with photoprotective host pigments are hypersensitive to thermal bleaching	ITS2 primers: ITSintfor2 and ITS-Reverse, ITS2 was cloned and sequenced.			ITSintfor2 and ITS-Reverse
1350	Acropora aspera	ITS2	Cladocopium C3	C3		Heron Island, GBR	Central Indo-Pacific	Northeast Australian Shelf	Central and Southern GBR	0.1	3	-23.44	151.91	GenBank	GenBank	Cloning of LSU, ITS2 & sequencing	1	2002	1	2002	Dove 2004 MEPS Scleractinian corals with photoprotective host pigments are hypersensitive to thermal bleaching	ITS2 primers: ITSintfor2 and ITS-Reverse, ITS2 was cloned and sequenced.			ITSintfor2 and ITS-Reverse
1351	Acropora aspera	ITS2	Cladocopium C3	C3		Heron Island, GBR	Central Indo-Pacific	Northeast Australian Shelf	Central and Southern GBR	0.1	3	-23.44	151.91	GenBank	GenBank	Cloning of LSU, ITS2 & sequencing	1	2002	1	2002	Dove 2004 MEPS Scleractinian corals with photoprotective host pigments are hypersensitive to thermal bleaching	ITS2 primers: ITSintfor2 and ITS-Reverse, ITS2 was cloned and sequenced.			ITSintfor2 and ITS-Reverse
1352	Acropora aspera	ITS2	Cladocopium C3	C3		Heron Island, GBR	Central Indo-Pacific	Northeast Australian Shelf	Central and Southern GBR	0.1	3	-23.44	151.91	GenBank	GenBank	Cloning of LSU, ITS2 & sequencing	1	2002	1	2002	Dove 2004 MEPS Scleractinian corals with photoprotective host pigments are hypersensitive to thermal bleaching	ITS2 primers: ITSintfor2 and ITS-Reverse, ITS2 was cloned and sequenced.			ITSintfor2 and ITS-Reverse
1353	Acropora aspera	ITS2	Cladocopium C3	C3		Heron Island, GBR	Central Indo-Pacific	Northeast Australian Shelf	Central and Southern GBR	0.1	3	-23.44	151.91	GenBank	GenBank	Cloning of LSU, ITS2 & sequencing	1	2002	1	2002	Dove 2004 MEPS Scleractinian corals with photoprotective host pigments are hypersensitive to thermal bleaching	ITS2 primers: ITSintfor2 and ITS-Reverse, ITS2 was cloned and sequenced.			ITSintfor2 and ITS-Reverse
1354	Acropora aspera	ITS2	Cladocopium C3	C3		Heron Island, GBR	Central Indo-Pacific	Northeast Australian Shelf	Central and Southern GBR	0.1	3	-23.44	151.91	GenBank	GenBank	Cloning of LSU, ITS2 & sequencing	1	2002	1	2002	Dove 2004 MEPS Scleractinian corals with photoprotective host pigments are hypersensitive to thermal bleaching	ITS2 primers: ITSintfor2 and ITS-Reverse, ITS2 was cloned and sequenced.			ITSintfor2 and ITS-Reverse
1355	Acropora aspera	ITS2	Cladocopium C3	C3		Heron Island, GBR	Central Indo-Pacific	Northeast Australian Shelf	Central and Southern GBR	0.1	3	-23.44	151.91	GenBank	GenBank	Cloning of LSU, ITS2 & sequencing	1	2002	1	2002	Dove 2004 MEPS Scleractinian corals with photoprotective host pigments are hypersensitive to thermal bleaching	ITS2 primers: ITSintfor2 and ITS-Reverse, ITS2 was cloned and sequenced.			ITSintfor2 and ITS-Reverse
1356	Acropora aspera	ITS2	Cladocopium C3	C3		Heron Island, GBR	Central Indo-Pacific	Northeast Australian Shelf	Central and Southern GBR	0.1	3	-23.44	151.91	GenBank	GenBank	Cloning of LSU, ITS2 & sequencing	1	2002	1	2002	Dove 2004 MEPS Scleractinian corals with photoprotective host pigments are hypersensitive to thermal bleaching	ITS2 primers: ITSintfor2 and ITS-Reverse, ITS2 was cloned and sequenced.			ITSintfor2 and ITS-Reverse
1357	Acropora aspera	ITS2	Cladocopium C3	C3		Heron Island, GBR	Central Indo-Pacific	Northeast Australian Shelf	Central and Southern GBR	0.1	3	-23.44	151.91	GenBank	GenBank	Cloning of LSU, ITS2 & sequencing	1	2002	1	2002	Dove 2004 MEPS Scleractinian corals with photoprotective host pigments are hypersensitive to thermal bleaching	ITS2 primers: ITSintfor2 and ITS-Reverse, ITS2 was cloned and sequenced.			ITSintfor2 and ITS-Reverse
1358	Acropora aspera	ITS2	Cladocopium C3	C3		Heron Island, GBR	Central Indo-Pacific	Northeast Australian Shelf	Central and Southern GBR	0.1	3	-23.44	151.91	GenBank	GenBank	Cloning of LSU, ITS2 & sequencing	1	2002	1	2002	Dove 2004 MEPS Scleractinian corals with photoprotective host pigments are hypersensitive to thermal bleaching	ITS2 primers: ITSintfor2 and ITS-Reverse, ITS2 was cloned and sequenced.			ITSintfor2 and ITS-Reverse
1359	Acropora aspera	ITS2	Cladocopium C3	C3		Heron Island, GBR	Central Indo-Pacific	Northeast Australian Shelf	Central and Southern GBR	0.1	3	-23.44	151.91	GenBank	GenBank	Cloning of LSU, ITS2 & sequencing	1	2002	1	2002	Dove 2004 MEPS Scleractinian corals with photoprotective host pigments are hypersensitive to thermal bleaching	ITS2 primers: ITSintfor2 and ITS-Reverse, ITS2 was cloned and sequenced.			ITSintfor2 and ITS-Reverse
1360	Acropora aspera	ITS2	Cladocopium C3	C3		Heron Island, GBR	Central Indo-Pacific	Northeast Australian Shelf	Central and Southern GBR	0.1	3	-23.44	151.91	GenBank	GenBank	Cloning of LSU, ITS2 & sequencing	1	2002	1	2002	Dove 2004 MEPS Scleractinian corals with photoprotective host pigments are hypersensitive to thermal bleaching	ITS2 primers: ITSintfor2 and ITS-Reverse, ITS2 was cloned and sequenced.			ITSintfor2 and ITS-Reverse
1361	Acropora aspera	ITS2	Cladocopium C3	C3		Heron Island, GBR	Central Indo-Pacific	Northeast Australian Shelf	Central and Southern GBR	0.1	3	-23.44	151.91	GenBank	GenBank	Cloning of LSU, ITS2 & sequencing	1	2002	1	2002	Dove 2004 MEPS Scleractinian corals with photoprotective host pigments are hypersensitive to thermal bleaching	ITS2 primers: ITSintfor2 and ITS-Reverse, ITS2 was cloned and sequenced.			ITSintfor2 and ITS-Reverse
1362	Acropora aspera	ITS2	Cladocopium C3	C3		Heron Island, GBR	Central Indo-Pacific	Northeast Australian Shelf	Central and Southern GBR	0.1	3	-23.44	151.91	GenBank	GenBank	Cloning of LSU, ITS2 & sequencing	1	2002	1	2002	Dove 2004 MEPS Scleractinian corals with photoprotective host pigments are hypersensitive to thermal bleaching	ITS2 primers: ITSintfor2 and ITS-Reverse, ITS2 was cloned and sequenced.			ITSintfor2 and ITS-Reverse
1363	Acropora aspera	ITS2	Cladocopium C3	C3		Heron Island, GBR	Central Indo-Pacific	Northeast Australian Shelf	Central and Southern GBR	0.1	3	-23.44	151.91	GenBank	GenBank	Cloning of LSU, ITS2 & sequencing	1	2002	1	2002	Dove 2004 MEPS Scleractinian corals with photoprotective host pigments are hypersensitive to thermal bleaching	ITS2 primers: ITSintfor2 and ITS-Reverse, ITS2 was cloned and sequenced.			ITSintfor2 and ITS-Reverse
1364	Acropora aspera	ITS2	Cladocopium C3	C3		Heron Island, GBR	Central Indo-Pacific	Northeast Australian Shelf	Central and Southern GBR	0.1	3	-23.44	151.91	GenBank	GenBank	Cloning of LSU, ITS2 & sequencing	1	2002	1	2002	Dove 2004 MEPS Scleractinian corals with photoprotective host pigments are hypersensitive to thermal bleaching	ITS2 primers: ITSintfor2 and ITS-Reverse, ITS2 was cloned and sequenced.			ITSintfor2 and ITS-Reverse
1365	Acropora aspera	ITS2	Cladocopium C3	C3		Heron Island, GBR	Central Indo-Pacific	Northeast Australian Shelf	Central and Southern GBR	0.1	3	-23.44	151.91	GenBank	GenBank	Cloning of LSU, ITS2 & sequencing	1	2002	1	2002	Dove 2004 MEPS Scleractinian corals with photoprotective host pigments are hypersensitive to thermal bleaching	ITS2 primers: ITSintfor2 and ITS-Reverse, ITS2 was cloned and sequenced.			ITSintfor2 and ITS-Reverse
1366	Acropora aspera	ITS2	Cladocopium C3	C3		Heron Island, GBR	Central Indo-Pacific	Northeast Australian Shelf	Central and Southern GBR	0.1	3	-23.44	151.91	GenBank	GenBank	Cloning of LSU, ITS2 & sequencing	1	2002	1	2002	Dove 2004 MEPS Scleractinian corals with photoprotective host pigments are hypersensitive to thermal bleaching	ITS2 primers: ITSintfor2 and ITS-Reverse, ITS2 was cloned and sequenced.			ITSintfor2 and ITS-Reverse
1367	Acropora aspera	ITS2	Cladocopium C3	C3		Heron Island, GBR	Central Indo-Pacific	Northeast Australian Shelf	Central and Southern GBR	0.1	3	-23.44	151.91	GenBank	GenBank	Cloning of LSU, ITS2 & sequencing	1	2002	1	2002	Dove 2004 MEPS Scleractinian corals with photoprotective host pigments are hypersensitive to thermal bleaching	ITS2 primers: ITSintfor2 and ITS-Reverse, ITS2 was cloned and sequenced.			ITSintfor2 and ITS-Reverse
1368	Acropora aspera	ITS2	Cladocopium C3	C3		Heron Island, GBR	Central Indo-Pacific	Northeast Australian Shelf	Central and Southern GBR	0.1	3	-23.44	151.91	GenBank	GenBank	Cloning of LSU, ITS2 & sequencing	1	2002	1	2002	Dove 2004 MEPS Scleractinian corals with photoprotective host pigments are hypersensitive to thermal bleaching	ITS2 primers: ITSintfor2 and ITS-Reverse, ITS2 was cloned and sequenced.			ITSintfor2 and ITS-Reverse
1369	Acropora aspera	ITS2	Cladocopium C3	C3		Heron Island, GBR	Central Indo-Pacific	Northeast Australian Shelf	Central and Southern GBR	0.1	3	-23.44	151.91	GenBank	GenBank	Cloning of LSU, ITS2 & sequencing	1	2002	1	2002	Dove 2004 MEPS Scleractinian corals with photoprotective host pigments are hypersensitive to thermal bleaching	ITS2 primers: ITSintfor2 and ITS-Reverse, ITS2 was cloned and sequenced.			ITSintfor2 and ITS-Reverse
1370	Acropora aspera	ITS2	Cladocopium C3	C3		Heron Island, GBR	Central Indo-Pacific	Northeast Australian Shelf	Central and Southern GBR	0.1	3	-23.44	151.91	GenBank	GenBank	Cloning of LSU, ITS2 & sequencing	1	2002	1	2002	Dove 2004 MEPS Scleractinian corals with photoprotective host pigments are hypersensitive to thermal bleaching	ITS2 primers: ITSintfor2 and ITS-Reverse, ITS2 was cloned and sequenced.			ITSintfor2 and ITS-Reverse
1371	Acropora aspera	ITS2	Cladocopium C3	C3		Heron Island, GBR	Central Indo-Pacific	Northeast Australian Shelf	Central and Southern GBR	0.1	3	-23.44	151.91	GenBank	GenBank	Cloning of LSU, ITS2 & sequencing	1	2002	1	2002	Dove 2004 MEPS Scleractinian corals with photoprotective host pigments are hypersensitive to thermal bleaching	ITS2 primers: ITSintfor2 and ITS-Reverse, ITS2 was cloned and sequenced.			ITSintfor2 and ITS-Reverse
1372	Acropora aspera	ITS2	Cladocopium C3	C3		Heron Island, GBR	Central Indo-Pacific	Northeast Australian Shelf	Central and Southern GBR	0.1	3	-23.44	151.91	GenBank	GenBank	Cloning of LSU, ITS2 & sequencing	1	2002	1	2002	Dove 2004 MEPS Scleractinian corals with photoprotective host pigments are hypersensitive to thermal bleaching	ITS2 primers: ITSintfor2 and ITS-Reverse, ITS2 was cloned and sequenced.			ITSintfor2 and ITS-Reverse
1373	Acropora aspera	ITS2	Cladocopium C3	C3		Heron Island, GBR	Central Indo-Pacific	Northeast Australian Shelf	Central and Southern GBR	0.1	3	-23.44	151.91	GenBank	GenBank	Cloning of LSU, ITS2 & sequencing	1	2002	1	2002	Dove 2004 MEPS Scleractinian corals with photoprotective host pigments are hypersensitive to thermal bleaching	ITS2 primers: ITSintfor2 and ITS-Reverse, ITS2 was cloned and sequenced.			ITSintfor2 and ITS-Reverse
1634	Acropora aspera	ITS2	Cladocopium C3	C3		Heron Island, GBR	Central Indo-Pacific	Northeast Australian Shelf	Central and Southern GBR	0	1	-23.43	151.9	SymbioGBR	SymbioGBR	SSCP of ITS2 & sequencing	12	2002	12	2002	Fisher 2012 CoralReefs The effect of temperature stress on coral-Symbiodinium associations	ITS2 primers: ITSintfor2 and ITS-Reverse , dominant bands in SSCP profiles were randomly excised & sequenced			ITSintfor2 and ITS-Reverse
1638	Acropora aspera	ITS2	Cladocopium C3	C3		Heron Island, GBR	Central Indo-Pacific	Northeast Australian Shelf	Central and Southern GBR	0	1	-23.43	151.9	SymbioGBR	SymbioGBR	SSCP of ITS2 & sequencing	12	2002	12	2002	Fisher 2012 CoralReefs The effect of temperature stress on coral-Symbiodinium associations	ITS2 primers: ITSintfor2 and ITS-Reverse , dominant bands in SSCP profiles were randomly excised & sequenced			ITSintfor2 and ITS-Reverse
1639	Acropora aspera	ITS2	Cladocopium C3	C3		Heron Island, GBR	Central Indo-Pacific	Northeast Australian Shelf	Central and Southern GBR	0	1	-23.43	151.9	SymbioGBR	SymbioGBR	SSCP of ITS2 & sequencing	12	2002	12	2002	Fisher 2012 CoralReefs The effect of temperature stress on coral-Symbiodinium associations	ITS2 primers: ITSintfor2 and ITS-Reverse , dominant bands in SSCP profiles were randomly excised & sequenced			ITSintfor2 and ITS-Reverse
1640	Acropora aspera	ITS2	Cladocopium C3	C3		Heron Island, GBR	Central Indo-Pacific	Northeast Australian Shelf	Central and Southern GBR	0	1	-23.43	151.9	SymbioGBR	SymbioGBR	SSCP of ITS2 & sequencing	12	2002	12	2002	Fisher 2012 CoralReefs The effect of temperature stress on coral-Symbiodinium associations	ITS2 primers: ITSintfor2 and ITS-Reverse , dominant bands in SSCP profiles were randomly excised & sequenced			ITSintfor2 and ITS-Reverse
1641	Acropora aspera	ITS2	Cladocopium C3	C3		Heron Island, GBR	Central Indo-Pacific	Northeast Australian Shelf	Central and Southern GBR	0	1	-23.43	151.9	SymbioGBR	SymbioGBR	SSCP of ITS2 & sequencing	12	2002	12	2002	Fisher 2012 CoralReefs The effect of temperature stress on coral-Symbiodinium associations	ITS2 primers: ITSintfor2 and ITS-Reverse , dominant bands in SSCP profiles were randomly excised & sequenced			ITSintfor2 and ITS-Reverse
19883	Acropora aspera	ITS2	Cladocopium C3	C3		Heron Island, GBR	Central Indo-Pacific	Northeast Australian Shelf	Central and Southern GBR	0	1	-23.43	151.9	SymbioGBR	SymbioGBR	SSCP of ITS2 & sequencing	12	2002	12	2002	Fisher 2012 CoralReefs The effect of temperature stress on coral-Symbiodinium associations	ITS2 primers: ITSintfor2 and ITS-Reverse , dominant bands in SSCP profiles were randomly excised & sequenced			ITSintfor2 and ITS-Reverse
19884	Acropora aspera	ITS2	Cladocopium C3	C3		Heron Island, GBR	Central Indo-Pacific	Northeast Australian Shelf	Central and Southern GBR	0	1	-23.43	151.9	SymbioGBR	SymbioGBR	SSCP of ITS2 & sequencing	12	2002	12	2002	Fisher 2012 CoralReefs The effect of temperature stress on coral-Symbiodinium associations	ITS2 primers: ITSintfor2 and ITS-Reverse , dominant bands in SSCP profiles were randomly excised & sequenced			ITSintfor2 and ITS-Reverse
19885	Acropora aspera	ITS2	Cladocopium C3	C3		Heron Island, GBR	Central Indo-Pacific	Northeast Australian Shelf	Central and Southern GBR	0	1	-23.43	151.9	SymbioGBR	SymbioGBR	SSCP of ITS2 & sequencing	12	2002	12	2002	Fisher 2012 CoralReefs The effect of temperature stress on coral-Symbiodinium associations	ITS2 primers: ITSintfor2 and ITS-Reverse , dominant bands in SSCP profiles were randomly excised & sequenced			ITSintfor2 and ITS-Reverse
2957	Acropora aspera	ITS2	Cladocopium C3	C3		Zamami Island, Japan	Central Indo-Pacific	South Kuroshio	South Kuroshio	1	10	26.2346	127.305	Riddle 2011	Riddle 2011, Advanced Aquarist	DGGE of ITS2 & sequencing	3	2002	3	2002	LaJeunesse 2004 MEPS Closely related Symbiodinium spp differ in relative dominance	ITS2 primers: ITSintfor2 and ITS2Clamp, representative dominant DGGE bands were excised & sequenced.			ITSintfor2 and ITS2Clamp
2958	Acropora aspera	ITS2	Cladocopium C3	C3		Zamami Island, Japan	Central Indo-Pacific	South Kuroshio	South Kuroshio	1	10	26.2346	127.305	Riddle 2011	Riddle 2011, Advanced Aquarist	DGGE of ITS2 & sequencing	3	2002	3	2002	LaJeunesse 2004 MEPS Closely related Symbiodinium spp differ in relative dominance	ITS2 primers: ITSintfor2 and ITS2Clamp, representative dominant DGGE bands were excised & sequenced.			ITSintfor2 and ITS2Clamp
9434	Acropora aspera	ITS2	Cladocopium C3i	C3i		Bundegi Reef	Central Indo-Pacific	Northwest Australian Shelf	Exmouth to Broome	NA	NA	-21.8667	114.167	Original pub	Original pub	SSCP of ITS1	NA	1998	NA	1998	van Oppen 2001 ProcRSocB Patterns of coral–dinoflagellate associations in Acropora	ITS1 Primers: symITSFP and SymITSRP; SSCP analysis and sequencing			symITSFP and SymITSRP
9435	Acropora aspera	ITS2	Cladocopium C3i	C3i		Bundegi Reef	Central Indo-Pacific	Northwest Australian Shelf	Exmouth to Broome	NA	NA	-21.8667	114.167	Original pub	Original pub	SSCP of ITS1	NA	1998	NA	1998	van Oppen 2001 ProcRSocB Patterns of coral–dinoflagellate associations in Acropora	ITS1 Primers: symITSFP and SymITSRP; SSCP analysis and sequencing			symITSFP and SymITSRP
9436	Acropora aspera	ITS2	Cladocopium C3i	C3i		Bundegi Reef	Central Indo-Pacific	Northwest Australian Shelf	Exmouth to Broome	NA	NA	-21.8667	114.167	Original pub	Original pub	SSCP of ITS1	NA	1998	NA	1998	van Oppen 2001 ProcRSocB Patterns of coral–dinoflagellate associations in Acropora	ITS1 Primers: symITSFP and SymITSRP; SSCP analysis and sequencing			symITSFP and SymITSRP
9437	Acropora aspera	ITS2	Cladocopium C3i	C3i		Bundegi Reef	Central Indo-Pacific	Northwest Australian Shelf	Exmouth to Broome	NA	NA	-21.8667	114.167	Original pub	Original pub	SSCP of ITS1	NA	1998	NA	1998	van Oppen 2001 ProcRSocB Patterns of coral–dinoflagellate associations in Acropora	ITS1 Primers: symITSFP and SymITSRP; SSCP analysis and sequencing			symITSFP and SymITSRP
9438	Acropora aspera	ITS2	Cladocopium C3i	C3i		Bundegi Reef	Central Indo-Pacific	Northwest Australian Shelf	Exmouth to Broome	NA	NA	-21.8667	114.167	Original pub	Original pub	SSCP of ITS1	NA	1998	NA	1998	van Oppen 2001 ProcRSocB Patterns of coral–dinoflagellate associations in Acropora	ITS1 Primers: symITSFP and SymITSRP; SSCP analysis and sequencing			symITSFP and SymITSRP
9439	Acropora aspera	ITS2	Cladocopium C3i	C3i		Pelorus Island, GBR	Central Indo-Pacific	Northeast Australian Shelf	Central and Southern GBR	NA	NA	-18.5545	146.493	Original pub	Original pub	SSCP of ITS1	NA	1997	NA	1997	van Oppen 2001 ProcRSocB Patterns of coral–dinoflagellate associations in Acropora	ITS1 Primers: symITSFP and SymITSRP; SSCP analysis and sequencing			symITSFP and SymITSRP
9440	Acropora aspera	ITS2	Cladocopium C3i	C3i		Pelorus Island, GBR	Central Indo-Pacific	Northeast Australian Shelf	Central and Southern GBR	NA	NA	-18.5545	146.493	Original pub	Original pub	SSCP of ITS1	NA	1997	NA	1997	van Oppen 2001 ProcRSocB Patterns of coral–dinoflagellate associations in Acropora	ITS1 Primers: symITSFP and SymITSRP; SSCP analysis and sequencing			symITSFP and SymITSRP
9441	Acropora aspera	ITS2	Cladocopium C3i	C3i		Pelorus Island, GBR	Central Indo-Pacific	Northeast Australian Shelf	Central and Southern GBR	NA	NA	-18.5545	146.493	Original pub	Original pub	SSCP of ITS1	NA	1997	NA	1997	van Oppen 2001 ProcRSocB Patterns of coral–dinoflagellate associations in Acropora	ITS1 Primers: symITSFP and SymITSRP; SSCP analysis and sequencing			symITSFP and SymITSRP
9442	Acropora aspera	ITS2	Cladocopium C3i	C3i		Pelorus Island, GBR	Central Indo-Pacific	Northeast Australian Shelf	Central and Southern GBR	NA	NA	-18.5545	146.493	Original pub	Original pub	SSCP of ITS1	NA	1997	NA	1997	van Oppen 2001 ProcRSocB Patterns of coral–dinoflagellate associations in Acropora	ITS1 Primers: symITSFP and SymITSRP; SSCP analysis and sequencing			symITSFP and SymITSRP
9443	Acropora aspera	ITS2	Cladocopium C3i	C3i		Pelorus Island, GBR	Central Indo-Pacific	Northeast Australian Shelf	Central and Southern GBR	NA	NA	-18.5545	146.493	Original pub	Original pub	SSCP of ITS1	NA	1997	NA	1997	van Oppen 2001 ProcRSocB Patterns of coral–dinoflagellate associations in Acropora	ITS1 Primers: symITSFP and SymITSRP; SSCP analysis and sequencing			symITSFP and SymITSRP
2431	Acropora aspera	ITS2	Cladocopium C3u	C3u		Cape Panwa	Western Indo-Pacific	Andaman	Andaman Sea Coral Coast	0	5	7.8073	98.4092	Geosymbio	Geosymbio	DGGE of ITS2 & sequencing	2	2007	2	2007	LaJeunesse 2010 JBiogeograph Long-standing environmental conditions isolation and host–symbiont specificity	ITS2 primers: ITSintfor2 and ITS2Clamp, representative dominant DGGE bands were excised & sequenced.			ITSintfor2 and ITS2Clamp
2432	Acropora aspera	ITS2	Cladocopium C3u	C3u		Cape Panwa	Western Indo-Pacific	Andaman	Andaman Sea Coral Coast	0	5	7.8073	98.4092	Geosymbio	Geosymbio	DGGE of ITS2 & sequencing	2	2007	2	2007	LaJeunesse 2010 JBiogeograph Long-standing environmental conditions isolation and host–symbiont specificity	ITS2 primers: ITSintfor2 and ITS2Clamp, representative dominant DGGE bands were excised & sequenced.			ITSintfor2 and ITS2Clamp
2433	Acropora aspera	ITS2	Cladocopium C3u	C3u		Cape Panwa	Western Indo-Pacific	Andaman	Andaman Sea Coral Coast	0	5	7.8073	98.4092	Geosymbio	Geosymbio	DGGE of ITS2 & sequencing	2	2007	2	2007	LaJeunesse 2010 JBiogeograph Long-standing environmental conditions isolation and host–symbiont specificity	ITS2 primers: ITSintfor2 and ITS2Clamp, representative dominant DGGE bands were excised & sequenced.			ITSintfor2 and ITS2Clamp
2434	Acropora aspera	ITS2	Cladocopium C3u	C3u		Ko Phi Phi Don	Western Indo-Pacific	Andaman	Andaman Sea Coral Coast	2	6	7.7333	98.7667	Geosymbio	Geosymbio	DGGE of ITS2 & sequencing	2	2007	2	2007	LaJeunesse 2010 JBiogeograph Long-standing environmental conditions isolation and host–symbiont specificity	ITS2 primers: ITSintfor2 and ITS2Clamp, representative dominant DGGE bands were excised & sequenced.			ITSintfor2 and ITS2Clamp
2435	Acropora aspera	ITS2	Cladocopium C3z	C3z		Racha	Western Indo-Pacific	Andaman	Andaman Sea Coral Coast	2	5	7.6101	98.3706	Geosymbio	Geosymbio	DGGE of ITS2 & sequencing	2	2007	2	2007	LaJeunesse 2010 JBiogeograph Long-standing environmental conditions isolation and host–symbiont specificity	ITS2 primers: ITSintfor2 and ITS2Clamp, representative dominant DGGE bands were excised & sequenced.			ITSintfor2 and ITS2Clamp
2436	Acropora aspera	ITS2	Durusdinium D1-4	D1-4		Cape Panwa	Western Indo-Pacific	Andaman	Andaman Sea Coral Coast	0	5	7.8073	98.4092	Geosymbio	Geosymbio	DGGE of ITS2 & sequencing	2	2007	2	2007	LaJeunesse 2010 JBiogeograph Long-standing environmental conditions isolation and host–symbiont specificity	ITS2 primers: ITSintfor2 and ITS2Clamp, representative dominant DGGE bands were excised & sequenced.			ITSintfor2 and ITS2Clamp
9626	Acropora cerealis	ITS2	Cladocopium C1	C1		Feather Reef GBR	Central Indo-Pacific	Northeast Australian Shelf	Central and Southern Great Barrier Reef	10	17	-17.5083	146.377	Riddle 2011	Riddle 2011, Advanced Aquarist	DGGE of ITS2 & sequencing	5	2003	5	2003	LaJeunesse 2004 MEPS Closely related Symbiodinium spp differ in relative dominance	ITS2 primers: ITSintfor2 and ITS2Clamp, representative dominant DGGE bands were excised & sequenced.			ITSintfor2 and ITS2Clamp
8926	Acropora cerealis	ITS2	Cladocopium C101	C101		Similan Islands	Western Indo-Pacific	Andaman	Andaman Sea Coral Coast	2	12	8.6525	97.6408	Geosymbio	Geosymbio	DGGE of ITS2 & sequencing	2	2007	2	2007	LaJeunesse 2010 JBiogeograph Long-standing environmental conditions isolation and host–symbiont specificity	ITS2 primers: ITSintfor2 and ITS2Clamp, representative dominant DGGE bands were excised & sequenced.			ITSintfor2 and ITS2Clamp
8795	Acropora cerealis	ITS2	Cladocopium C3	C3		Heron Island, GBR	Central Indo-Pacific	Northeast Australian Shelf	Central and Southern GBR	3	3	-23	152	Original pub	Original pub	DGGE of ITS2 & sequencing	2	2002	3	2002	LaJeunesse 2003 LimnolOceanogr Low symbiont diversity in southern Great Barrier Reef	ITS2 primers: ITSintfor2 and ITS2Clamp, representative dominant DGGE bands were excised & sequenced.			ITSintfor2 and ITS2Clamp
8796	Acropora cerealis	ITS2	Cladocopium C3	C3		Heron Island, GBR	Central Indo-Pacific	Northeast Australian Shelf	Central and Southern GBR	10	10	-23	152	Original pub	Original pub	DGGE of ITS2 & sequencing	2	2002	3	2002	LaJeunesse 2003 LimnolOceanogr Low symbiont diversity in southern Great Barrier Reef	ITS2 primers: ITSintfor2 and ITS2Clamp, representative dominant DGGE bands were excised & sequenced.			ITSintfor2 and ITS2Clamp
9627	Acropora cerealis	ITS2	Cladocopium C3	C3		Zamami Island, Japan	Central Indo-Pacific	South Kuroshio	South Kuroshio	1	10	26.2346	127.305	Riddle 2011	Riddle 2011, Advanced Aquarist	DGGE of ITS2 & sequencing	3	2002	3	2002	LaJeunesse 2004 MEPS Closely related Symbiodinium spp differ in relative dominance	ITS2 primers: ITSintfor2 and ITS2Clamp, representative dominant DGGE bands were excised & sequenced.			ITSintfor2 and ITS2Clamp
9628	Acropora cerealis	ITS2	Cladocopium C3	C3		Zamami Island, Japan	Central Indo-Pacific	South Kuroshio	South Kuroshio	1	10	26.2346	127.305	Riddle 2011	Riddle 2011, Advanced Aquarist	DGGE of ITS2 & sequencing	3	2002	3	2002	LaJeunesse 2004 MEPS Closely related Symbiodinium spp differ in relative dominance	ITS2 primers: ITSintfor2 and ITS2Clamp, representative dominant DGGE bands were excised & sequenced.			ITSintfor2 and ITS2Clamp
9629	Acropora cerealis	ITS2	Cladocopium C3	C3		Rib Reef GBR	Central Indo-Pacific	Northeast Australian Shelf	Central and Southern Great Barrier Reef	10	17	-18.4781	146.871	Riddle 2011	Riddle 2011, Advanced Aquarist	DGGE of ITS2 & sequencing	5	2003	5	2003	LaJeunesse 2004 MEPS Closely related Symbiodinium spp differ in relative dominance	ITS2 primers: ITSintfor2 and ITS2Clamp, representative dominant DGGE bands were excised & sequenced.			ITSintfor2 and ITS2Clamp
15129	Acropora cerealis	ITS2	Cladocopium C3	C3		Xiaodonghai Bay	Central Indo-Pacific	South China Sea	Gulf of Tonkin	1	10	18.2065	109.504	Original pub	Original pub	DGGE of ITS2 & sequencing	10	2008	10	2008	Zhou 2011 JSysEvol Low genetic diversity of symbiotic dinoflagellates	ITS2 primers: ITSintfor2 and ITS2Clamp, dominant DGGE bands were excised amplified and sequenced.			ITSintfor2 and ITS2Clamp
9630	Acropora cerealis	ITS2	Cladocopium C3i	C3i		Rib Reef GBR	Central Indo-Pacific	Northeast Australian Shelf	Central and Southern Great Barrier Reef	1	8	-18.4781	146.871	Riddle 2011	Riddle 2011, Advanced Aquarist	DGGE of ITS2 & sequencing	5	2003	5	2003	LaJeunesse 2004 MEPS Closely related Symbiodinium spp differ in relative dominance	ITS2 primers: ITSintfor2 and ITS2Clamp, representative dominant DGGE bands were excised & sequenced.			ITSintfor2 and ITS2Clamp
9444	Acropora cerealis	ITS2	Cladocopium C3i	C3i		Trunk Reef, GBR	Central Indo-Pacific	Northeast Australian Shelf	Central and Southern GBR	NA	NA	-18.3498	146.827	Original pub	Original pub	SSCP of ITS1	NA	1998	NA	1998	van Oppen 2001 ProcRSocB Patterns of coral–dinoflagellate associations in Acropora	ITS1 Primers: symITSFP and SymITSRP; SSCP analysis and sequencing			symITSFP and SymITSRP
9445	Acropora cerealis	ITS2	Cladocopium C3i	C3i		Trunk Reef, GBR	Central Indo-Pacific	Northeast Australian Shelf	Central and Southern GBR	NA	NA	-18.3498	146.827	Original pub	Original pub	SSCP of ITS1	NA	1998	NA	1998	van Oppen 2001 ProcRSocB Patterns of coral–dinoflagellate associations in Acropora	ITS1 Primers: symITSFP and SymITSRP; SSCP analysis and sequencing			symITSFP and SymITSRP
9446	Acropora cerealis	ITS2	Cladocopium C3i	C3i		Trunk Reef, GBR	Central Indo-Pacific	Northeast Australian Shelf	Central and Southern GBR	NA	NA	-18.3498	146.827	Original pub	Original pub	SSCP of ITS1	NA	1998	NA	1998	van Oppen 2001 ProcRSocB Patterns of coral–dinoflagellate associations in Acropora	ITS1 Primers: symITSFP and SymITSRP; SSCP analysis and sequencing			symITSFP and SymITSRP
9447	Acropora cerealis	ITS2	Cladocopium C3i	C3i		Trunk Reef, GBR	Central Indo-Pacific	Northeast Australian Shelf	Central and Southern GBR	NA	NA	-18.3498	146.827	Original pub	Original pub	SSCP of ITS1	NA	1998	NA	1998	van Oppen 2001 ProcRSocB Patterns of coral–dinoflagellate associations in Acropora	ITS1 Primers: symITSFP and SymITSRP; SSCP analysis and sequencing			symITSFP and SymITSRP
9448	Acropora cerealis	ITS2	Cladocopium C3i	C3i		Trunk Reef, GBR	Central Indo-Pacific	Northeast Australian Shelf	Central and Southern GBR	NA	NA	-18.3498	146.827	Original pub	Original pub	SSCP of ITS1	NA	1998	NA	1998	van Oppen 2001 ProcRSocB Patterns of coral–dinoflagellate associations in Acropora	ITS1 Primers: symITSFP and SymITSRP; SSCP analysis and sequencing			symITSFP and SymITSRP
9631	Acropora cerealis	ITS2	Cladocopium C3k	C3k		Feather Reef GBR	Central Indo-Pacific	Northeast Australian Shelf	Central and Southern Great Barrier Reef	10	17	-17.5083	146.377	Riddle 2011	Riddle 2011, Advanced Aquarist	DGGE of ITS2 & sequencing	5	2003	5	2003	LaJeunesse 2004 MEPS Closely related Symbiodinium spp differ in relative dominance	ITS2 primers: ITSintfor2 and ITS2Clamp, representative dominant DGGE bands were excised & sequenced.			ITSintfor2 and ITS2Clamp
15130	Acropora cerealis	ITS2	Durusdinium D1	D1		Xiaodonghai Bay	Central Indo-Pacific	South China Sea	Gulf of Tonkin	1	10	18.2065	109.504	Original pub	Original pub	DGGE of ITS2 & sequencing	10	2008	10	2008	Zhou 2011 JSysEvol Low genetic diversity of symbiotic dinoflagellates	ITS2 primers: ITSintfor2 and ITS2Clamp, dominant DGGE bands were excised amplified and sequenced.			ITSintfor2 and ITS2Clamp
140	Acropora cervicornis	ITS2	Symbiodinium A3	A3		Puerto Morelos, Quintana Roo, Yucatan, Mexico	Tropical Atlantic	Tropical Northwestern Atlantic	Southern Gulf of Mexico	5	5	21	-87	Riddle 2011	Riddle 2011, Advanced Aquarist	DGGE of ITS2 & sequencing	NA	NA	NA	NA	Banaszak 2006 JExptMarBiolEcol The distribution of mycosporine-like amino acids	ITS2 primers: ITSintfor2 and ITS2Clamp, novel bands profiles were excised & sequenced.			ITSintfor2 and ITS2Clamp
709	Acropora cervicornis	ITS2	Symbiodinium A3	A3		National Natural Park Rosario and San Bernardo Corals, Columbia	Tropical Atlantic	Tropical Northwestern Atlantic	Southwestern Caribbean	8	10	10.25	-75.78	GeoSymbio	GeoSymbio	SSU-RFLP, ITS2-DGGE & sequencing	5	2006	9	2006	Camargo 2009 BiodiversConserv Community involvement in management for maintaining coral reef resilience	ITS2 primers: ITSintfor2 and ITS2Clamp, dominant bands were excised & sequenced.			ITSintfor2 and ITS2Clamp
710	Acropora cervicornis	ITS2	Symbiodinium A3	A3		National Natural Park Rosario and San Bernardo Corals, Columbia	Tropical Atlantic	Tropical Northwestern Atlantic	Southwestern Caribbean	8	10	10.25	-75.78	GeoSymbio	GeoSymbio	SSU-RFLP, ITS2-DGGE & sequencing	5	2006	9	2006	Camargo 2009 BiodiversConserv Community involvement in management for maintaining coral reef resilience	ITS2 primers: ITSintfor2 and ITS2Clamp, dominant bands were excised & sequenced.			ITSintfor2 and ITS2Clamp
1508	Acropora cervicornis	ITS2	Symbiodinium A3	A3		Belize	Tropical Atlantic	Tropical Northwestern Atlantic	Western Caribbean	6	10	17	-88	Original pub	Original pub	DGGE of ITS2 & sequencing	7	2002	8	2003	Finney 2010 MicrobEcol The Relative Significance of Host–Habitat	ITS2 primers: ITSintfor2 and ITS2Clamp, dominant bands of each characteristic profile were excised & sequenced			ITSintfor2 and ITS2Clamp
1509	Acropora cervicornis	ITS2	Symbiodinium A3	A3		Belize	Tropical Atlantic	Tropical Northwestern Atlantic	Western Caribbean	10	30	17	-88	Original pub	Original pub	DGGE of ITS2 & sequencing	7	2002	8	2003	Finney 2010 MicrobEcol The Relative Significance of Host–Habitat	ITS2 primers: ITSintfor2 and ITS2Clamp, dominant bands of each characteristic profile were excised & sequenced			ITSintfor2 and ITS2Clamp
1510	Acropora cervicornis	ITS2	Symbiodinium A3	A3		Belize	Tropical Atlantic	Tropical Northwestern Atlantic	Western Caribbean	10	30	17	-88	Original pub	Original pub	DGGE of ITS2 & sequencing	7	2002	8	2003	Finney 2010 MicrobEcol The Relative Significance of Host–Habitat	ITS2 primers: ITSintfor2 and ITS2Clamp, dominant bands of each characteristic profile were excised & sequenced			ITSintfor2 and ITS2Clamp
1511	Acropora cervicornis	ITS2	Symbiodinium A3	A3		Belize	Tropical Atlantic	Tropical Northwestern Atlantic	Western Caribbean	10	30	17	-88	Original pub	Original pub	DGGE of ITS2 & sequencing	7	2002	8	2003	Finney 2010 MicrobEcol The Relative Significance of Host–Habitat	ITS2 primers: ITSintfor2 and ITS2Clamp, dominant bands of each characteristic profile were excised & sequenced			ITSintfor2 and ITS2Clamp
2919	Acropora cervicornis	ITS2	Symbiodinium A3	A3		Puerto Morelos, Yucatan, Mexico	Tropical Atlantic	Tropical Northwestern Atlantic	Southern Gulf of Mexico	4	4	21	-87	Aquarist	Riddle 2011, Advanced Aquarist, Advanced Aquarist	DGGE of ITS2 & sequencing	8	1998	9	1999	LaJeunesse 2002 MarBiol Diversity and community structure of symbiotic dinoflagellates	ITS2 primers: ITSintfor2 and ITS2Clamp, representative dominant DGGE bands were excised & sequenced.			ITSintfor2 and ITS2Clamp
2920	Acropora cervicornis	ITS2	Symbiodinium A3	A3		Lee Stocking Island, Bahamas	Tropical Atlantic	Tropical Northwestern Atlantic	Bahamian	3	3	24	-76	Aquarist	Riddle 2011, Advanced Aquarist, Advanced Aquarist	DGGE of ITS2 & sequencing	8	1998	9	1999	LaJeunesse 2002 MarBiol Diversity and community structure of symbiotic dinoflagellates	ITS2 primers: ITSintfor2 and ITS2Clamp, representative dominant DGGE bands were excised & sequenced.			ITSintfor2 and ITS2Clamp
2921	Acropora cervicornis	ITS2	Symbiodinium A3	A3		Lee Stocking Island, Bahamas	Tropical Atlantic	Tropical Northwestern Atlantic	Bahamian	3	3	24	-76	Aquarist	Riddle 2011, Advanced Aquarist, Advanced Aquarist	DGGE of ITS2 & sequencing	8	1998	9	1999	LaJeunesse 2002 MarBiol Diversity and community structure of symbiotic dinoflagellates	ITS2 primers: ITSintfor2 and ITS2Clamp, representative dominant DGGE bands were excised & sequenced.			ITSintfor2 and ITS2Clamp
2922	Acropora cervicornis	ITS2	Symbiodinium A3	A3		Lee Stocking Island, Bahamas	Tropical Atlantic	Tropical Northwestern Atlantic	Bahamian	3	3	24	-76	Aquarist	Riddle 2011, Advanced Aquarist, Advanced Aquarist	DGGE of ITS2 & sequencing	8	1998	9	1999	LaJeunesse 2002 MarBiol Diversity and community structure of symbiotic dinoflagellates	ITS2 primers: ITSintfor2 and ITS2Clamp, representative dominant DGGE bands were excised & sequenced.			ITSintfor2 and ITS2Clamp
2923	Acropora cervicornis	ITS2	Symbiodinium A3	A3		Lee Stocking Island, Bahamas	Tropical Atlantic	Tropical Northwestern Atlantic	Bahamian	3	3	24	-76	Aquarist	Riddle 2011, Advanced Aquarist, Advanced Aquarist	DGGE of ITS2 & sequencing	8	1998	9	1999	LaJeunesse 2002 MarBiol Diversity and community structure of symbiotic dinoflagellates	ITS2 primers: ITSintfor2 and ITS2Clamp, representative dominant DGGE bands were excised & sequenced.			ITSintfor2 and ITS2Clamp
5925	Acropora cervicornis	ITS2	Symbiodinium A3	A3		Lee Stocking Island	Tropical Atlantic	Tropical Northwestern Atlantic	Bahamian	3	3	24.25	-76.5	GeoSymbio	GeoSymbio	DGGE of ITS2	11	2002	11	2002	Thornhill 2006 MarBiol Multi-year seasonal genotypic surveys of coral-algal symbioses	ITS2 primers: ITSintfor2 and ITS2Clamp, dominant DGGE bands were excised and sequenced; sensitivity of ITS2-DGGE determined at 5-10%			ITSintfor2 and ITS2Clamp
5926	Acropora cervicornis	ITS2	Symbiodinium A3	A3		Lee Stocking Island	Tropical Atlantic	Tropical Northwestern Atlantic	Bahamian	3	3	24.25	-76.5	GeoSymbio	GeoSymbio	DGGE of ITS2	11	2002	11	2002	Thornhill 2006 MarBiol Multi-year seasonal genotypic surveys of coral-algal symbioses	ITS2 primers: ITSintfor2 and ITS2Clamp, dominant DGGE bands were excised and sequenced; sensitivity of ITS2-DGGE determined at 5-10%			ITSintfor2 and ITS2Clamp
5927	Acropora cervicornis	ITS2	Symbiodinium A3	A3		Lee Stocking Island	Tropical Atlantic	Tropical Northwestern Atlantic	Bahamian	3	3	24.25	-76.5	GeoSymbio	GeoSymbio	DGGE of ITS2	11	2002	11	2002	Thornhill 2006 MarBiol Multi-year seasonal genotypic surveys of coral-algal symbioses	ITS2 primers: ITSintfor2 and ITS2Clamp, dominant DGGE bands were excised and sequenced; sensitivity of ITS2-DGGE determined at 5-10%			ITSintfor2 and ITS2Clamp
5928	Acropora cervicornis	ITS2	Symbiodinium A3	A3		Lee Stocking Island	Tropical Atlantic	Tropical Northwestern Atlantic	Bahamian	3	3	24.25	-76.5	GeoSymbio	GeoSymbio	DGGE of ITS2	11	2002	11	2002	Thornhill 2006 MarBiol Multi-year seasonal genotypic surveys of coral-algal symbioses	ITS2 primers: ITSintfor2 and ITS2Clamp, dominant DGGE bands were excised and sequenced; sensitivity of ITS2-DGGE determined at 5-10%			ITSintfor2 and ITS2Clamp
5929	Acropora cervicornis	ITS2	Symbiodinium A3	A3		Lee Stocking Island	Tropical Atlantic	Tropical Northwestern Atlantic	Bahamian	3	3	24.25	-76.5	GeoSymbio	GeoSymbio	DGGE of ITS2	11	2002	11	2002	Thornhill 2006 MarBiol Multi-year seasonal genotypic surveys of coral-algal symbioses	ITS2 primers: ITSintfor2 and ITS2Clamp, dominant DGGE bands were excised and sequenced; sensitivity of ITS2-DGGE determined at 5-10%			ITSintfor2 and ITS2Clamp
5930	Acropora cervicornis	ITS2	Symbiodinium A3	A3		Lee Stocking Island	Tropical Atlantic	Tropical Northwestern Atlantic	Bahamian	3	3	24.25	-76.5	GeoSymbio	GeoSymbio	DGGE of ITS2	11	2002	11	2002	Thornhill 2006 MarBiol Multi-year seasonal genotypic surveys of coral-algal symbioses	ITS2 primers: ITSintfor2 and ITS2Clamp, dominant DGGE bands were excised and sequenced; sensitivity of ITS2-DGGE determined at 5-10%			ITSintfor2 and ITS2Clamp
5931	Acropora cervicornis	ITS2	Symbiodinium A3	A3		Florida Keys	Tropical Atlantic	Tropical Northwestern Atlantic	Floridian	1	2	24.98	-80.36	GeoSymbio	GeoSymbio	DGGE of ITS2	11	2002	11	2002	Thornhill 2006 MarBiol Multi-year seasonal genotypic surveys of coral-algal symbioses	ITS2 primers: ITSintfor2 and ITS2Clamp, dominant DGGE bands were excised and sequenced; sensitivity of ITS2-DGGE determined at 5-10%			ITSintfor2 and ITS2Clamp
5932	Acropora cervicornis	ITS2	Symbiodinium A3	A3		Florida Keys	Tropical Atlantic	Tropical Northwestern Atlantic	Floridian	1	2	24.98	-80.36	GeoSymbio	GeoSymbio	DGGE of ITS2	11	2002	11	2002	Thornhill 2006 MarBiol Multi-year seasonal genotypic surveys of coral-algal symbioses	ITS2 primers: ITSintfor2 and ITS2Clamp, dominant DGGE bands were excised and sequenced; sensitivity of ITS2-DGGE determined at 5-10%			ITSintfor2 and ITS2Clamp
5933	Acropora cervicornis	ITS2	Symbiodinium A3	A3		Florida Keys	Tropical Atlantic	Tropical Northwestern Atlantic	Floridian	1	2	24.98	-80.36	GeoSymbio	GeoSymbio	DGGE of ITS2	11	2002	11	2002	Thornhill 2006 MarBiol Multi-year seasonal genotypic surveys of coral-algal symbioses	ITS2 primers: ITSintfor2 and ITS2Clamp, dominant DGGE bands were excised and sequenced; sensitivity of ITS2-DGGE determined at 5-10%			ITSintfor2 and ITS2Clamp
5934	Acropora cervicornis	ITS2	Symbiodinium A3	A3		Florida Keys	Tropical Atlantic	Tropical Northwestern Atlantic	Floridian	1	2	24.98	-80.36	GeoSymbio	GeoSymbio	DGGE of ITS2	11	2002	11	2002	Thornhill 2006 MarBiol Multi-year seasonal genotypic surveys of coral-algal symbioses	ITS2 primers: ITSintfor2 and ITS2Clamp, dominant DGGE bands were excised and sequenced; sensitivity of ITS2-DGGE determined at 5-10%			ITSintfor2 and ITS2Clamp
5935	Acropora cervicornis	ITS2	Symbiodinium A3	A3		Florida Keys	Tropical Atlantic	Tropical Northwestern Atlantic	Floridian	1	2	24.98	-80.36	GeoSymbio	GeoSymbio	DGGE of ITS2	11	2002	11	2002	Thornhill 2006 MarBiol Multi-year seasonal genotypic surveys of coral-algal symbioses	ITS2 primers: ITSintfor2 and ITS2Clamp, dominant DGGE bands were excised and sequenced; sensitivity of ITS2-DGGE determined at 5-10%			ITSintfor2 and ITS2Clamp
5936	Acropora cervicornis	ITS2	Symbiodinium A3	A3		Florida Keys	Tropical Atlantic	Tropical Northwestern Atlantic	Floridian	1	2	24.98	-80.36	GeoSymbio	GeoSymbio	DGGE of ITS2	11	2002	11	2002	Thornhill 2006 MarBiol Multi-year seasonal genotypic surveys of coral-algal symbioses	ITS2 primers: ITSintfor2 and ITS2Clamp, dominant DGGE bands were excised and sequenced; sensitivity of ITS2-DGGE determined at 5-10%			ITSintfor2 and ITS2Clamp
5937	Acropora cervicornis	ITS2	Symbiodinium A3	A3		Florida Keys	Tropical Atlantic	Tropical Northwestern Atlantic	Floridian	3	3	24.98	-80.36	GeoSymbio	GeoSymbio	DGGE of ITS2	11	2002	11	2002	Thornhill 2006 MarBiol Multi-year seasonal genotypic surveys of coral-algal symbioses	ITS2 primers: ITSintfor2 and ITS2Clamp, dominant DGGE bands were excised and sequenced; sensitivity of ITS2-DGGE determined at 5-10%			ITSintfor2 and ITS2Clamp
5938	Acropora cervicornis	ITS2	Symbiodinium A3	A3		Florida Keys	Tropical Atlantic	Tropical Northwestern Atlantic	Floridian	3	3	24.98	-80.36	GeoSymbio	GeoSymbio	DGGE of ITS2	11	2002	11	2002	Thornhill 2006 MarBiol Multi-year seasonal genotypic surveys of coral-algal symbioses	ITS2 primers: ITSintfor2 and ITS2Clamp, dominant DGGE bands were excised and sequenced; sensitivity of ITS2-DGGE determined at 5-10%			ITSintfor2 and ITS2Clamp
5939	Acropora cervicornis	ITS2	Symbiodinium A3	A3		Florida Keys	Tropical Atlantic	Tropical Northwestern Atlantic	Floridian	3	3	24.98	-80.36	GeoSymbio	GeoSymbio	DGGE of ITS2	11	2002	11	2002	Thornhill 2006 MarBiol Multi-year seasonal genotypic surveys of coral-algal symbioses	ITS2 primers: ITSintfor2 and ITS2Clamp, dominant DGGE bands were excised and sequenced; sensitivity of ITS2-DGGE determined at 5-10%			ITSintfor2 and ITS2Clamp
5940	Acropora cervicornis	ITS2	Symbiodinium A3	A3		Florida Keys	Tropical Atlantic	Tropical Northwestern Atlantic	Floridian	3	3	24.98	-80.36	GeoSymbio	GeoSymbio	DGGE of ITS2	11	2002	11	2002	Thornhill 2006 MarBiol Multi-year seasonal genotypic surveys of coral-algal symbioses	ITS2 primers: ITSintfor2 and ITS2Clamp, dominant DGGE bands were excised and sequenced; sensitivity of ITS2-DGGE determined at 5-10%			ITSintfor2 and ITS2Clamp
5941	Acropora cervicornis	ITS2	Symbiodinium A3	A3		Florida Keys	Tropical Atlantic	Tropical Northwestern Atlantic	Floridian	3	3	24.98	-80.36	GeoSymbio	GeoSymbio	DGGE of ITS2	11	2002	11	2002	Thornhill 2006 MarBiol Multi-year seasonal genotypic surveys of coral-algal symbioses	ITS2 primers: ITSintfor2 and ITS2Clamp, dominant DGGE bands were excised and sequenced; sensitivity of ITS2-DGGE determined at 5-10%			ITSintfor2 and ITS2Clamp
5942	Acropora cervicornis	ITS2	Symbiodinium A3	A3		Florida Keys	Tropical Atlantic	Tropical Northwestern Atlantic	Floridian	3	3	24.98	-80.36	GeoSymbio	GeoSymbio	DGGE of ITS2	11	2002	11	2002	Thornhill 2006 MarBiol Multi-year seasonal genotypic surveys of coral-algal symbioses	ITS2 primers: ITSintfor2 and ITS2Clamp, dominant DGGE bands were excised and sequenced; sensitivity of ITS2-DGGE determined at 5-10%			ITSintfor2 and ITS2Clamp
2924	Acropora cervicornis	ITS2	Cladocopium C12	C12		Lee Stocking Island, Bahamas	Tropical Atlantic	Tropical Northwestern Atlantic	Bahamian	12	12	24	-76	Aquarist	Riddle 2011, Advanced Aquarist, Advanced Aquarist	DGGE of ITS2 & sequencing	8	1998	9	1999	LaJeunesse 2002 MarBiol Diversity and community structure of symbiotic dinoflagellates	ITS2 primers: ITSintfor2 and ITS2Clamp, representative dominant DGGE bands were excised & sequenced.			ITSintfor2 and ITS2Clamp
15474	Acropora cervicornis	ITS2	Cladocopium C94a	C94a		NA	NA	NA	NA	NA	NA	NA	NA	Original pub	Original pub	DGGE of ITS2 & sequencing	NA	NA	NA	NA	Smith 2009 JPhycol symbiodinium (dinophyta) diversity and stability in aquarium	ITS2 primers: ITSintfor2 and ITS2Clamp, dominant DGGE bands were excised and sequenced			ITSintfor2 and ITS2Clamp
1512	Acropora cervicornis	ITS2	Durusdinium D1-4	D1-4		Belize	Tropical Atlantic	Tropical Northwestern Atlantic	Western Caribbean	10	30	17	-88	Original pub	Original pub	DGGE of ITS2 & sequencing	7	2002	8	2003	Finney 2010 MicrobEcol The Relative Significance of Host–Habitat	ITS2 primers: ITSintfor2 and ITS2Clamp, dominant bands of each characteristic profile were excised & sequenced			ITSintfor2 and ITS2Clamp
1513	Acropora cervicornis	ITS2	Durusdinium D1-4	D1-4		Belize	Tropical Atlantic	Tropical Northwestern Atlantic	Western Caribbean	10	30	17	-88	Original pub	Original pub	DGGE of ITS2 & sequencing	7	2002	8	2003	Finney 2010 MicrobEcol The Relative Significance of Host–Habitat	ITS2 primers: ITSintfor2 and ITS2Clamp, dominant bands of each characteristic profile were excised & sequenced			ITSintfor2 and ITS2Clamp
5324	Acropora cytherea	ITS2	Symbiodinium A1	A1		French Frigate Shoals	Eastern Indo-Pacific	Hawaii	Hawaii	NA	NA	23.82	-166.11	GenBank	GenBank	Cloning of ITS2 & sequencing	5	2006	5	2006	Stat 2008 BiolInvasions Vectored introductions of marine endosymbiotic dinoflagellates into Hawaii	ITS2 primers: ITSintfor2 and ITS2Rev, cloning and sequencing of PCR products			ITSintfor2 and ITS2Clamp
5327	Acropora cytherea	ITS2	Symbiodinium A1	A1		French Frigate Shoals	Eastern Indo-Pacific	Hawaii	Hawaii	NA	NA	23.82	-166.11	GenBank	GenBank	Cloning of ITS2 & sequencing	5	2006	5	2006	Stat 2008 BiolInvasions Vectored introductions of marine endosymbiotic dinoflagellates into Hawaii	ITS2 primers: ITSintfor2 and ITS2Rev, cloning and sequencing of PCR products			ITSintfor2 and ITS2Clamp
5329	Acropora cytherea	ITS2	Symbiodinium A1	A1		French Frigate Shoals	Eastern Indo-Pacific	Hawaii	Hawaii	NA	NA	23.82	-166.11	GenBank	GenBank	Cloning of ITS2 & sequencing	5	2006	5	2006	Stat 2008 BiolInvasions Vectored introductions of marine endosymbiotic dinoflagellates into Hawaii	ITS2 primers: ITSintfor2 and ITS2Rev, cloning and sequencing of PCR products			ITSintfor2 and ITS2Clamp
5331	Acropora cytherea	ITS2	Symbiodinium A1	A1		French Frigate Shoals	Eastern Indo-Pacific	Hawaii	Hawaii	NA	NA	23.82	-166.11	GenBank	GenBank	Cloning of ITS2 & sequencing	5	2006	5	2006	Stat 2008 BiolInvasions Vectored introductions of marine endosymbiotic dinoflagellates into Hawaii	ITS2 primers: ITSintfor2 and ITS2Rev, cloning and sequencing of PCR products			ITSintfor2 and ITS2Clamp
16669	Acropora cytherea	ITS2	Symbiodinium A1	A1		French Frigate Shoals	Eastern Indo-Pacific	Hawaii	Hawaii	10	20	23.7592	-164.807	Original pub	Original pub	Cloning of ITS2 & sequencing	NA	2005	NA	2009	Stat 2015 CoralReefs Geographic structure and host specificity	ITS2 primers: ITSD and ITS2rev2, cloning & sequencing of PCR products; verification of intragenomic variants & pseudogenes			ITSD and ITS2rev2
16670	Acropora cytherea	ITS2	Symbiodinium A1	A1		French Frigate Shoals	Eastern Indo-Pacific	Hawaii	Hawaii	10	20	23.7592	-164.807	Original pub	Original pub	Cloning of ITS2 & sequencing	NA	2005	NA	2009	Stat 2015 CoralReefs Geographic structure and host specificity	ITS2 primers: ITSD and ITS2rev2, cloning & sequencing of PCR products; verification of intragenomic variants & pseudogenes			ITSD and ITS2rev2
16671	Acropora cytherea	ITS2	Symbiodinium A1	A1		French Frigate Shoals	Eastern Indo-Pacific	Hawaii	Hawaii	10	20	23.7592	-164.807	Original pub	Original pub	Cloning of ITS2 & sequencing	NA	2005	NA	2009	Stat 2015 CoralReefs Geographic structure and host specificity	ITS2 primers: ITSD and ITS2rev2, cloning & sequencing of PCR products; verification of intragenomic variants & pseudogenes			ITSD and ITS2rev2
16672	Acropora cytherea	ITS2	Symbiodinium A1	A1		French Frigate Shoals	Eastern Indo-Pacific	Hawaii	Hawaii	10	20	23.7592	-164.807	Original pub	Original pub	Cloning of ITS2 & sequencing	NA	2005	NA	2009	Stat 2015 CoralReefs Geographic structure and host specificity	ITS2 primers: ITSD and ITS2rev2, cloning & sequencing of PCR products; verification of intragenomic variants & pseudogenes			ITSD and ITS2rev2
17212	Acropora cytherea	ITS2	Symbiodinium A1.3	A1.3		Moorea	Eastern Indo-Pacific	Central Polynesia	Society Islands	2	2	-17.485	-149.834	Original Pub	Original Pub	Cloning of ITS2 & sequencing	NA	NA	NA	NA	Putnam 2012 ProcRSocB Endosymbiotic flexibility associates with environ sensitivity	ITS2 primers: ITS-DINO and ITS2rev2, cloning and sequencing of PCR products			S-DINO and ITS2Rev2
5462	Acropora cytherea	ITS2	Cladocopium C1	C1		Johnston Atoll, Hawaii	Eastern Indo-Pacific	Hawaii	Hawaii	5	10	18.078	-169.533	GenBank	GenBank	Cloning of ITS2 & sequencing, verification of clones	6	2006	6	2006	Stat 2009 MEPS Specificity in communities of Symbiodinium in corals from Johnston Atoll	ITS2 primers: ITSD and ITS2rev2, cloning & sequencing of PCR products; verification of intragenomic variants & pseudogenes			ITSD and ITS2rev2
5463	Acropora cytherea	ITS2	Cladocopium C1	C1		Johnston Atoll, Hawaii	Eastern Indo-Pacific	Hawaii	Hawaii	5	10	18.078	-169.533	GenBank	GenBank	Cloning of ITS2 & sequencing, verification of clones	6	2006	6	2006	Stat 2009 MEPS Specificity in communities of Symbiodinium in corals from Johnston Atoll	ITS2 primers: ITSD and ITS2rev2, cloning & sequencing of PCR products; verification of intragenomic variants & pseudogenes			ITSD and ITS2rev2
5464	Acropora cytherea	ITS2	Cladocopium C1	C1		Johnston Atoll, Hawaii	Eastern Indo-Pacific	Hawaii	Hawaii	2	4	18.078	-169.533	GenBank	GenBank	Cloning of ITS2 & sequencing, verification of clones	6	2006	6	2006	Stat 2009 MEPS Specificity in communities of Symbiodinium in corals from Johnston Atoll	ITS2 primers: ITSD and ITS2rev2, cloning & sequencing of PCR products; verification of intragenomic variants & pseudogenes			ITSD and ITS2rev2
5465	Acropora cytherea	ITS2	Cladocopium C1	C1		Johnston Atoll, Hawaii	Eastern Indo-Pacific	Hawaii	Hawaii	2	4	18.078	-169.533	GenBank	GenBank	Cloning of ITS2 & sequencing, verification of clones	6	2006	6	2006	Stat 2009 MEPS Specificity in communities of Symbiodinium in corals from Johnston Atoll	ITS2 primers: ITSD and ITS2rev2, cloning & sequencing of PCR products; verification of intragenomic variants & pseudogenes			ITSD and ITS2rev2
5466	Acropora cytherea	ITS2	Cladocopium C1	C1		Johnston Atoll, Hawaii	Eastern Indo-Pacific	Hawaii	Hawaii	2	4	18.078	-169.533	GenBank	GenBank	Cloning of ITS2 & sequencing, verification of clones	6	2006	6	2006	Stat 2009 MEPS Specificity in communities of Symbiodinium in corals from Johnston Atoll	ITS2 primers: ITSD and ITS2rev2, cloning & sequencing of PCR products; verification of intragenomic variants & pseudogenes			ITSD and ITS2rev2
5467	Acropora cytherea	ITS2	Cladocopium C1	C1		Johnston Atoll, Hawaii	Eastern Indo-Pacific	Hawaii	Hawaii	3	7	18.078	-169.533	GenBank	GenBank	Cloning of ITS2 & sequencing, verification of clones	6	2006	6	2006	Stat 2009 MEPS Specificity in communities of Symbiodinium in corals from Johnston Atoll	ITS2 primers: ITSD and ITS2rev2, cloning & sequencing of PCR products; verification of intragenomic variants & pseudogenes			ITSD and ITS2rev2
5468	Acropora cytherea	ITS2	Cladocopium C1	C1		Johnston Atoll, Hawaii	Eastern Indo-Pacific	Hawaii	Hawaii	3	7	18.078	-169.533	GenBank	GenBank	Cloning of ITS2 & sequencing, verification of clones	6	2006	6	2006	Stat 2009 MEPS Specificity in communities of Symbiodinium in corals from Johnston Atoll	ITS2 primers: ITSD and ITS2rev2, cloning & sequencing of PCR products; verification of intragenomic variants & pseudogenes			ITSD and ITS2rev2
5469	Acropora cytherea	ITS2	Cladocopium C1	C1		Johnston Atoll, Hawaii	Eastern Indo-Pacific	Hawaii	Hawaii	2	4	18.078	-169.533	GenBank	GenBank	Cloning of ITS2 & sequencing, verification of clones	6	2006	6	2006	Stat 2009 MEPS Specificity in communities of Symbiodinium in corals from Johnston Atoll	ITS2 primers: ITSD and ITS2rev2, cloning & sequencing of PCR products; verification of intragenomic variants & pseudogenes			ITSD and ITS2rev2
5470	Acropora cytherea	ITS2	Cladocopium C1	C1		Johnston Atoll, Hawaii	Eastern Indo-Pacific	Hawaii	Hawaii	3	7	18.078	-169.533	GenBank	GenBank	Cloning of ITS2 & sequencing, verification of clones	6	2006	6	2006	Stat 2009 MEPS Specificity in communities of Symbiodinium in corals from Johnston Atoll	ITS2 primers: ITSD and ITS2rev2, cloning & sequencing of PCR products; verification of intragenomic variants & pseudogenes			ITSD and ITS2rev2
5471	Acropora cytherea	ITS2	Cladocopium C1	C1		Johnston Atoll, Hawaii	Eastern Indo-Pacific	Hawaii	Hawaii	3	7	18.078	-169.533	GenBank	GenBank	Cloning of ITS2 & sequencing, verification of clones	6	2006	6	2006	Stat 2009 MEPS Specificity in communities of Symbiodinium in corals from Johnston Atoll	ITS2 primers: ITSD and ITS2rev2, cloning & sequencing of PCR products; verification of intragenomic variants & pseudogenes			ITSD and ITS2rev2
16673	Acropora cytherea	ITS2	Cladocopium C1	C1		French Frigate Shoals	Eastern Indo-Pacific	Hawaii	Hawaii	10	20	23.7592	-164.807	Original pub	Original pub	Cloning of ITS2 & sequencing	NA	2005	NA	2009	Stat 2015 CoralReefs Geographic structure and host specificity	ITS2 primers: ITSD and ITS2rev2, cloning & sequencing of PCR products; verification of intragenomic variants & pseudogenes			ITSD and ITS2rev2
16674	Acropora cytherea	ITS2	Cladocopium C1	C1		French Frigate Shoals	Eastern Indo-Pacific	Hawaii	Hawaii	10	20	23.7592	-164.807	Original pub	Original pub	Cloning of ITS2 & sequencing	NA	2005	NA	2009	Stat 2015 CoralReefs Geographic structure and host specificity	ITS2 primers: ITSD and ITS2rev2, cloning & sequencing of PCR products; verification of intragenomic variants & pseudogenes			ITSD and ITS2rev2
5322	Acropora cytherea	ITS2	Cladocopium C1c	C1c		French Frigate Shoals	Eastern Indo-Pacific	Hawaii	Hawaii	NA	NA	23.82	-166.11	GenBank	GenBank	Cloning of ITS2 & sequencing	5	2006	5	2006	Stat 2008 BiolInvasions Vectored introductions of marine endosymbiotic dinoflagellates into Hawaii	ITS2 primers: ITSintfor2 and ITS2Rev, cloning and sequencing of PCR products			ITSintfor2 and ITS2Clamp
16675	Acropora cytherea	ITS2	Cladocopium C1c.1	C1c.1		French Frigate Shoals	Eastern Indo-Pacific	Hawaii	Hawaii	10	20	23.7592	-164.807	Original pub	Original pub	Cloning of ITS2 & sequencing	NA	2005	NA	2009	Stat 2015 CoralReefs Geographic structure and host specificity	ITS2 primers: ITSD and ITS2rev2, cloning & sequencing of PCR products; verification of intragenomic variants & pseudogenes			ITSD and ITS2rev2
16676	Acropora cytherea	ITS2	Cladocopium C1c.1	C1c.1		French Frigate Shoals	Eastern Indo-Pacific	Hawaii	Hawaii	10	20	23.7592	-164.807	Original pub	Original pub	Cloning of ITS2 & sequencing	NA	2005	NA	2009	Stat 2015 CoralReefs Geographic structure and host specificity	ITS2 primers: ITSD and ITS2rev2, cloning & sequencing of PCR products; verification of intragenomic variants & pseudogenes			ITSD and ITS2rev2
5516	Acropora cytherea	ITS2	Cladocopium C21.13	C21.13		Johnston Atoll, Hawaii	Eastern Indo-Pacific	Hawaii	Hawaii	3	7	18.078	-169.533	GenBank	GenBank	Cloning of ITS2 & sequencing, verification of clones	6	2006	6	2006	Stat 2009 MEPS Specificity in communities of Symbiodinium in corals from Johnston Atoll	ITS2 primers: ITSD and ITS2rev2, cloning & sequencing of PCR products; verification of intragenomic variants & pseudogenes			ITSD and ITS2rev2
5517	Acropora cytherea	ITS2	Cladocopium C21.13	C21.13		Johnston Atoll, Hawaii	Eastern Indo-Pacific	Hawaii	Hawaii	3	7	18.078	-169.533	GenBank	GenBank	Cloning of ITS2 & sequencing, verification of clones	6	2006	6	2006	Stat 2009 MEPS Specificity in communities of Symbiodinium in corals from Johnston Atoll	ITS2 primers: ITSD and ITS2rev2, cloning & sequencing of PCR products; verification of intragenomic variants & pseudogenes			ITSD and ITS2rev2
5326	Acropora cytherea	ITS2	Cladocopium C27	C27		French Frigate Shoals	Eastern Indo-Pacific	Hawaii	Hawaii	NA	NA	23.82	-166.11	GenBank	GenBank	Cloning of ITS2 & sequencing	5	2006	5	2006	Stat 2008 BiolInvasions Vectored introductions of marine endosymbiotic dinoflagellates into Hawaii	ITS2 primers: ITSintfor2 and ITS2Rev, cloning and sequencing of PCR products			ITSintfor2 and ITS2Clamp
16679	Acropora cytherea	ITS2	Cladocopium C27	C27		French Frigate Shoals	Eastern Indo-Pacific	Hawaii	Hawaii	10	20	23.7592	-164.807	Original pub	Original pub	Cloning of ITS2 & sequencing	NA	2005	NA	2009	Stat 2015 CoralReefs Geographic structure and host specificity	ITS2 primers: ITSD and ITS2rev2, cloning & sequencing of PCR products; verification of intragenomic variants & pseudogenes			ITSD and ITS2rev2
3124	Acropora cytherea	ITS2	Cladocopium C3	C3		Heron Island, GBR	Central Indo-Pacific	Northeast Australian Shelf	Central and Southern GBR	10	10	-23	152	Aquarist	Riddle 2011, Advanced Aquarist, Advanced Aquarist	DGGE of ITS2 & sequencing	2	2002	3	2002	LaJeunesse 2003 LimnolOceanogr Low symbiont diversity in southern Great Barrier Reef	ITS2 primers: ITSintfor2 and ITS2Clamp, representative dominant DGGE bands were excised & sequenced.			ITSintfor2 and ITS2Clamp
3125	Acropora cytherea	ITS2	Cladocopium C3	C3		Heron Island, GBR	Central Indo-Pacific	Northeast Australian Shelf	Central and Southern GBR	3	3	-23	152	Aquarist	Riddle 2011, Advanced Aquarist, Advanced Aquarist	DGGE of ITS2 & sequencing	2	2002	3	2002	LaJeunesse 2003 LimnolOceanogr Low symbiont diversity in southern Great Barrier Reef	ITS2 primers: ITSintfor2 and ITS2Clamp, representative dominant DGGE bands were excised & sequenced.			ITSintfor2 and ITS2Clamp
2959	Acropora cytherea	ITS2	Cladocopium C3	C3		Rib Reef GBR	Central Indo-Pacific	Northeast Australian Shelf	Central and Southern Great Barrier Reef	1	8	-18.4781	146.871	Aquarist	Riddle 2011, Advanced Aquarist, Advanced Aquarist	DGGE of ITS2 & sequencing	5	2003	5	2003	LaJeunesse 2004 MEPS Closely related Symbiodinium spp differ in relative dominance	ITS2 primers: ITSintfor2 and ITS2Clamp, representative dominant DGGE bands were excised & sequenced.			ITSintfor2 and ITS2Clamp
5472	Acropora cytherea	ITS2	Cladocopium C3	C3		Johnston Atoll, Hawaii	Eastern Indo-Pacific	Hawaii	Hawaii	5	10	18.078	-169.533	GenBank	GenBank	Cloning of ITS2 & sequencing, verification of clones	6	2006	6	2006	Stat 2009 MEPS Specificity in communities of Symbiodinium in corals from Johnston Atoll	ITS2 primers: ITSD and ITS2rev2, cloning & sequencing of PCR products; verification of intragenomic variants & pseudogenes			ITSD and ITS2rev2
5473	Acropora cytherea	ITS2	Cladocopium C3	C3		Johnston Atoll, Hawaii	Eastern Indo-Pacific	Hawaii	Hawaii	5	10	18.078	-169.533	GenBank	GenBank	Cloning of ITS2 & sequencing, verification of clones	6	2006	6	2006	Stat 2009 MEPS Specificity in communities of Symbiodinium in corals from Johnston Atoll	ITS2 primers: ITSD and ITS2rev2, cloning & sequencing of PCR products; verification of intragenomic variants & pseudogenes			ITSD and ITS2rev2
5474	Acropora cytherea	ITS2	Cladocopium C3	C3		Johnston Atoll, Hawaii	Eastern Indo-Pacific	Hawaii	Hawaii	5	10	18.078	-169.533	GenBank	GenBank	Cloning of ITS2 & sequencing, verification of clones	6	2006	6	2006	Stat 2009 MEPS Specificity in communities of Symbiodinium in corals from Johnston Atoll	ITS2 primers: ITSD and ITS2rev2, cloning & sequencing of PCR products; verification of intragenomic variants & pseudogenes			ITSD and ITS2rev2
5475	Acropora cytherea	ITS2	Cladocopium C3	C3		Johnston Atoll, Hawaii	Eastern Indo-Pacific	Hawaii	Hawaii	5	10	18.078	-169.533	GenBank	GenBank	Cloning of ITS2 & sequencing, verification of clones	6	2006	6	2006	Stat 2009 MEPS Specificity in communities of Symbiodinium in corals from Johnston Atoll	ITS2 primers: ITSD and ITS2rev2, cloning & sequencing of PCR products; verification of intragenomic variants & pseudogenes			ITSD and ITS2rev2
5476	Acropora cytherea	ITS2	Cladocopium C3	C3		Johnston Atoll, Hawaii	Eastern Indo-Pacific	Hawaii	Hawaii	2	4	18.078	-169.533	GenBank	GenBank	Cloning of ITS2 & sequencing, verification of clones	6	2006	6	2006	Stat 2009 MEPS Specificity in communities of Symbiodinium in corals from Johnston Atoll	ITS2 primers: ITSD and ITS2rev2, cloning & sequencing of PCR products; verification of intragenomic variants & pseudogenes			ITSD and ITS2rev2
5477	Acropora cytherea	ITS2	Cladocopium C3	C3		Johnston Atoll, Hawaii	Eastern Indo-Pacific	Hawaii	Hawaii	2	4	18.078	-169.533	GenBank	GenBank	Cloning of ITS2 & sequencing, verification of clones	6	2006	6	2006	Stat 2009 MEPS Specificity in communities of Symbiodinium in corals from Johnston Atoll	ITS2 primers: ITSD and ITS2rev2, cloning & sequencing of PCR products; verification of intragenomic variants & pseudogenes			ITSD and ITS2rev2
5478	Acropora cytherea	ITS2	Cladocopium C3	C3		Johnston Atoll, Hawaii	Eastern Indo-Pacific	Hawaii	Hawaii	2	4	18.078	-169.533	GenBank	GenBank	Cloning of ITS2 & sequencing, verification of clones	6	2006	6	2006	Stat 2009 MEPS Specificity in communities of Symbiodinium in corals from Johnston Atoll	ITS2 primers: ITSD and ITS2rev2, cloning & sequencing of PCR products; verification of intragenomic variants & pseudogenes			ITSD and ITS2rev2
5479	Acropora cytherea	ITS2	Cladocopium C3	C3		Johnston Atoll, Hawaii	Eastern Indo-Pacific	Hawaii	Hawaii	2	4	18.078	-169.533	GenBank	GenBank	Cloning of ITS2 & sequencing, verification of clones	6	2006	6	2006	Stat 2009 MEPS Specificity in communities of Symbiodinium in corals from Johnston Atoll	ITS2 primers: ITSD and ITS2rev2, cloning & sequencing of PCR products; verification of intragenomic variants & pseudogenes			ITSD and ITS2rev2
5480	Acropora cytherea	ITS2	Cladocopium C3	C3		Johnston Atoll, Hawaii	Eastern Indo-Pacific	Hawaii	Hawaii	2	4	18.078	-169.533	GenBank	GenBank	Cloning of ITS2 & sequencing, verification of clones	6	2006	6	2006	Stat 2009 MEPS Specificity in communities of Symbiodinium in corals from Johnston Atoll	ITS2 primers: ITSD and ITS2rev2, cloning & sequencing of PCR products; verification of intragenomic variants & pseudogenes			ITSD and ITS2rev2
5481	Acropora cytherea	ITS2	Cladocopium C3	C3		Johnston Atoll, Hawaii	Eastern Indo-Pacific	Hawaii	Hawaii	2	4	18.078	-169.533	GenBank	GenBank	Cloning of ITS2 & sequencing, verification of clones	6	2006	6	2006	Stat 2009 MEPS Specificity in communities of Symbiodinium in corals from Johnston Atoll	ITS2 primers: ITSD and ITS2rev2, cloning & sequencing of PCR products; verification of intragenomic variants & pseudogenes			ITSD and ITS2rev2
5482	Acropora cytherea	ITS2	Cladocopium C3	C3		Johnston Atoll, Hawaii	Eastern Indo-Pacific	Hawaii	Hawaii	2	4	18.078	-169.533	GenBank	GenBank	Cloning of ITS2 & sequencing, verification of clones	6	2006	6	2006	Stat 2009 MEPS Specificity in communities of Symbiodinium in corals from Johnston Atoll	ITS2 primers: ITSD and ITS2rev2, cloning & sequencing of PCR products; verification of intragenomic variants & pseudogenes			ITSD and ITS2rev2
5483	Acropora cytherea	ITS2	Cladocopium C3	C3		Johnston Atoll, Hawaii	Eastern Indo-Pacific	Hawaii	Hawaii	3	7	18.078	-169.533	GenBank	GenBank	Cloning of ITS2 & sequencing, verification of clones	6	2006	6	2006	Stat 2009 MEPS Specificity in communities of Symbiodinium in corals from Johnston Atoll	ITS2 primers: ITSD and ITS2rev2, cloning & sequencing of PCR products; verification of intragenomic variants & pseudogenes			ITSD and ITS2rev2
5484	Acropora cytherea	ITS2	Cladocopium C3	C3		Johnston Atoll, Hawaii	Eastern Indo-Pacific	Hawaii	Hawaii	3	7	18.078	-169.533	GenBank	GenBank	Cloning of ITS2 & sequencing, verification of clones	6	2006	6	2006	Stat 2009 MEPS Specificity in communities of Symbiodinium in corals from Johnston Atoll	ITS2 primers: ITSD and ITS2rev2, cloning & sequencing of PCR products; verification of intragenomic variants & pseudogenes			ITSD and ITS2rev2
5485	Acropora cytherea	ITS2	Cladocopium C3	C3		Johnston Atoll, Hawaii	Eastern Indo-Pacific	Hawaii	Hawaii	3	7	18.078	-169.533	GenBank	GenBank	Cloning of ITS2 & sequencing, verification of clones	6	2006	6	2006	Stat 2009 MEPS Specificity in communities of Symbiodinium in corals from Johnston Atoll	ITS2 primers: ITSD and ITS2rev2, cloning & sequencing of PCR products; verification of intragenomic variants & pseudogenes			ITSD and ITS2rev2
5486	Acropora cytherea	ITS2	Cladocopium C3	C3		Johnston Atoll, Hawaii	Eastern Indo-Pacific	Hawaii	Hawaii	2	4	18.078	-169.533	GenBank	GenBank	Cloning of ITS2 & sequencing, verification of clones	6	2006	6	2006	Stat 2009 MEPS Specificity in communities of Symbiodinium in corals from Johnston Atoll	ITS2 primers: ITSD and ITS2rev2, cloning & sequencing of PCR products; verification of intragenomic variants & pseudogenes			ITSD and ITS2rev2
5487	Acropora cytherea	ITS2	Cladocopium C3	C3		Johnston Atoll, Hawaii	Eastern Indo-Pacific	Hawaii	Hawaii	2	4	18.078	-169.533	GenBank	GenBank	Cloning of ITS2 & sequencing, verification of clones	6	2006	6	2006	Stat 2009 MEPS Specificity in communities of Symbiodinium in corals from Johnston Atoll	ITS2 primers: ITSD and ITS2rev2, cloning & sequencing of PCR products; verification of intragenomic variants & pseudogenes			ITSD and ITS2rev2
5488	Acropora cytherea	ITS2	Cladocopium C3	C3		Johnston Atoll, Hawaii	Eastern Indo-Pacific	Hawaii	Hawaii	2	4	18.078	-169.533	GenBank	GenBank	Cloning of ITS2 & sequencing, verification of clones	6	2006	6	2006	Stat 2009 MEPS Specificity in communities of Symbiodinium in corals from Johnston Atoll	ITS2 primers: ITSD and ITS2rev2, cloning & sequencing of PCR products; verification of intragenomic variants & pseudogenes			ITSD and ITS2rev2
5489	Acropora cytherea	ITS2	Cladocopium C3	C3		Johnston Atoll, Hawaii	Eastern Indo-Pacific	Hawaii	Hawaii	2	4	18.078	-169.533	GenBank	GenBank	Cloning of ITS2 & sequencing, verification of clones	6	2006	6	2006	Stat 2009 MEPS Specificity in communities of Symbiodinium in corals from Johnston Atoll	ITS2 primers: ITSD and ITS2rev2, cloning & sequencing of PCR products; verification of intragenomic variants & pseudogenes			ITSD and ITS2rev2
5490	Acropora cytherea	ITS2	Cladocopium C3	C3		Johnston Atoll, Hawaii	Eastern Indo-Pacific	Hawaii	Hawaii	2	4	18.078	-169.533	GenBank	GenBank	Cloning of ITS2 & sequencing, verification of clones	6	2006	6	2006	Stat 2009 MEPS Specificity in communities of Symbiodinium in corals from Johnston Atoll	ITS2 primers: ITSD and ITS2rev2, cloning & sequencing of PCR products; verification of intragenomic variants & pseudogenes			ITSD and ITS2rev2
5491	Acropora cytherea	ITS2	Cladocopium C3	C3		Johnston Atoll, Hawaii	Eastern Indo-Pacific	Hawaii	Hawaii	2	4	18.078	-169.533	GenBank	GenBank	Cloning of ITS2 & sequencing, verification of clones	6	2006	6	2006	Stat 2009 MEPS Specificity in communities of Symbiodinium in corals from Johnston Atoll	ITS2 primers: ITSD and ITS2rev2, cloning & sequencing of PCR products; verification of intragenomic variants & pseudogenes			ITSD and ITS2rev2
5492	Acropora cytherea	ITS2	Cladocopium C3	C3		Johnston Atoll, Hawaii	Eastern Indo-Pacific	Hawaii	Hawaii	2	4	18.078	-169.533	GenBank	GenBank	Cloning of ITS2 & sequencing, verification of clones	6	2006	6	2006	Stat 2009 MEPS Specificity in communities of Symbiodinium in corals from Johnston Atoll	ITS2 primers: ITSD and ITS2rev2, cloning & sequencing of PCR products; verification of intragenomic variants & pseudogenes			ITSD and ITS2rev2
5493	Acropora cytherea	ITS2	Cladocopium C3	C3		Johnston Atoll, Hawaii	Eastern Indo-Pacific	Hawaii	Hawaii	2	4	18.078	-169.533	GenBank	GenBank	Cloning of ITS2 & sequencing, verification of clones	6	2006	6	2006	Stat 2009 MEPS Specificity in communities of Symbiodinium in corals from Johnston Atoll	ITS2 primers: ITSD and ITS2rev2, cloning & sequencing of PCR products; verification of intragenomic variants & pseudogenes			ITSD and ITS2rev2
5494	Acropora cytherea	ITS2	Cladocopium C3	C3		Johnston Atoll, Hawaii	Eastern Indo-Pacific	Hawaii	Hawaii	3	7	18.078	-169.533	GenBank	GenBank	Cloning of ITS2 & sequencing, verification of clones	6	2006	6	2006	Stat 2009 MEPS Specificity in communities of Symbiodinium in corals from Johnston Atoll	ITS2 primers: ITSD and ITS2rev2, cloning & sequencing of PCR products; verification of intragenomic variants & pseudogenes			ITSD and ITS2rev2
5495	Acropora cytherea	ITS2	Cladocopium C3	C3		Johnston Atoll, Hawaii	Eastern Indo-Pacific	Hawaii	Hawaii	3	7	18.078	-169.533	GenBank	GenBank	Cloning of ITS2 & sequencing, verification of clones	6	2006	6	2006	Stat 2009 MEPS Specificity in communities of Symbiodinium in corals from Johnston Atoll	ITS2 primers: ITSD and ITS2rev2, cloning & sequencing of PCR products; verification of intragenomic variants & pseudogenes			ITSD and ITS2rev2
5496	Acropora cytherea	ITS2	Cladocopium C3	C3		Johnston Atoll, Hawaii	Eastern Indo-Pacific	Hawaii	Hawaii	3	7	18.078	-169.533	GenBank	GenBank	Cloning of ITS2 & sequencing, verification of clones	6	2006	6	2006	Stat 2009 MEPS Specificity in communities of Symbiodinium in corals from Johnston Atoll	ITS2 primers: ITSD and ITS2rev2, cloning & sequencing of PCR products; verification of intragenomic variants & pseudogenes			ITSD and ITS2rev2
5497	Acropora cytherea	ITS2	Cladocopium C3	C3		Johnston Atoll, Hawaii	Eastern Indo-Pacific	Hawaii	Hawaii	3	7	18.078	-169.533	GenBank	GenBank	Cloning of ITS2 & sequencing, verification of clones	6	2006	6	2006	Stat 2009 MEPS Specificity in communities of Symbiodinium in corals from Johnston Atoll	ITS2 primers: ITSD and ITS2rev2, cloning & sequencing of PCR products; verification of intragenomic variants & pseudogenes			ITSD and ITS2rev2
5498	Acropora cytherea	ITS2	Cladocopium C3	C3		Johnston Atoll, Hawaii	Eastern Indo-Pacific	Hawaii	Hawaii	3	7	18.078	-169.533	GenBank	GenBank	Cloning of ITS2 & sequencing, verification of clones	6	2006	6	2006	Stat 2009 MEPS Specificity in communities of Symbiodinium in corals from Johnston Atoll	ITS2 primers: ITSD and ITS2rev2, cloning & sequencing of PCR products; verification of intragenomic variants & pseudogenes			ITSD and ITS2rev2
16677	Acropora cytherea	ITS2	Cladocopium C3	C3		French Frigate Shoals	Eastern Indo-Pacific	Hawaii	Hawaii	10	20	23.7592	-164.807	Original pub	Original pub	Cloning of ITS2 & sequencing	NA	2005	NA	2009	Stat 2015 CoralReefs Geographic structure and host specificity	ITS2 primers: ITSD and ITS2rev2, cloning & sequencing of PCR products; verification of intragenomic variants & pseudogenes			ITSD and ITS2rev2
16678	Acropora cytherea	ITS2	Cladocopium C3	C3		French Frigate Shoals	Eastern Indo-Pacific	Hawaii	Hawaii	10	20	23.7592	-164.807	Original pub	Original pub	Cloning of ITS2 & sequencing	NA	2005	NA	2009	Stat 2015 CoralReefs Geographic structure and host specificity	ITS2 primers: ITSD and ITS2rev2, cloning & sequencing of PCR products; verification of intragenomic variants & pseudogenes			ITSD and ITS2rev2
16128	Acropora cytherea	ITS2	Cladocopium C3	C3		Penguin Spit Inner	Eastern Indo-Pacific	Central Polynesia	Line Islands	2	3	5.87389	-162.105	Original publication	Original publication	DGGE of ITS2 & sequencing	6	2007	6	2007	Wicks 2012 Host tolerance, not symbiont tolerance, determinesthe distribution of coral species in relation to their environmentat a Central Pacific atoll	ITS2 primers: ITSintfor2 and ITS2Clamp, dominant DGGE bands were excised amplified and sequenced.			ITSintfor2 and ITS2Clamp
16129	Acropora cytherea	ITS2	Cladocopium C3	C3		Penguin Spit Inner	Eastern Indo-Pacific	Central Polynesia	Line Islands	2	3	5.87389	-162.105	Original publication	Original publication	DGGE of ITS2 & sequencing	6	2007	6	2007	Wicks 2012 Host tolerance, not symbiont tolerance, determinesthe distribution of coral species in relation to their environmentat a Central Pacific atoll	ITS2 primers: ITSintfor2 and ITS2Clamp, dominant DGGE bands were excised amplified and sequenced.			ITSintfor2 and ITS2Clamp
16130	Acropora cytherea	ITS2	Cladocopium C3	C3		Penguin Spit Inner	Eastern Indo-Pacific	Central Polynesia	Line Islands	2	3	5.87389	-162.105	Original publication	Original publication	DGGE of ITS2 & sequencing	6	2007	6	2007	Wicks 2012 Host tolerance, not symbiont tolerance, determinesthe distribution of coral species in relation to their environmentat a Central Pacific atoll	ITS2 primers: ITSintfor2 and ITS2Clamp, dominant DGGE bands were excised amplified and sequenced.			ITSintfor2 and ITS2Clamp
16131	Acropora cytherea	ITS2	Cladocopium C3	C3		Penguin Spit Mid	Eastern Indo-Pacific	Central Polynesia	Line Islands	2	3	5.8721	-162.108	Original publication	Original publication	DGGE of ITS2 & sequencing	6	2007	6	2007	Wicks 2012 Host tolerance, not symbiont tolerance, determinesthe distribution of coral species in relation to their environmentat a Central Pacific atoll	ITS2 primers: ITSintfor2 and ITS2Clamp, dominant DGGE bands were excised amplified and sequenced.			ITSintfor2 and ITS2Clamp
16132	Acropora cytherea	ITS2	Cladocopium C3	C3		Penguin Spit Mid	Eastern Indo-Pacific	Central Polynesia	Line Islands	2	3	5.8721	-162.108	Original publication	Original publication	DGGE of ITS2 & sequencing	6	2007	6	2007	Wicks 2012 Host tolerance, not symbiont tolerance, determinesthe distribution of coral species in relation to their environmentat a Central Pacific atoll	ITS2 primers: ITSintfor2 and ITS2Clamp, dominant DGGE bands were excised amplified and sequenced.			ITSintfor2 and ITS2Clamp
16133	Acropora cytherea	ITS2	Cladocopium C3	C3		Penguin Spit Mid	Eastern Indo-Pacific	Central Polynesia	Line Islands	2	3	5.8721	-162.108	Original publication	Original publication	DGGE of ITS2 & sequencing	6	2007	6	2007	Wicks 2012 Host tolerance, not symbiont tolerance, determinesthe distribution of coral species in relation to their environmentat a Central Pacific atoll	ITS2 primers: ITSintfor2 and ITS2Clamp, dominant DGGE bands were excised amplified and sequenced.			ITSintfor2 and ITS2Clamp
5511	Acropora cytherea	ITS2	Cladocopium C3.10	C3.10		Johnston Atoll, Hawaii	Eastern Indo-Pacific	Hawaii	Hawaii	3	7	18.078	-169.533	GenBank	GenBank	Cloning of ITS2 & sequencing, verification of clones	6	2006	6	2006	Stat 2009 MEPS Specificity in communities of Symbiodinium in corals from Johnston Atoll	ITS2 primers: ITSD and ITS2rev2, cloning & sequencing of PCR products; verification of intragenomic variants & pseudogenes			ITSD and ITS2rev2
5512	Acropora cytherea	ITS2	Cladocopium C3.10	C3.10		Johnston Atoll, Hawaii	Eastern Indo-Pacific	Hawaii	Hawaii	3	7	18.078	-169.533	GenBank	GenBank	Cloning of ITS2 & sequencing, verification of clones	6	2006	6	2006	Stat 2009 MEPS Specificity in communities of Symbiodinium in corals from Johnston Atoll	ITS2 primers: ITSD and ITS2rev2, cloning & sequencing of PCR products; verification of intragenomic variants & pseudogenes			ITSD and ITS2rev2
5513	Acropora cytherea	ITS2	Cladocopium C3.11	C3.11		Johnston Atoll, Hawaii	Eastern Indo-Pacific	Hawaii	Hawaii	5	10	18.078	-169.533	GenBank	GenBank	Cloning of ITS2 & sequencing, verification of clones	6	2006	6	2006	Stat 2009 MEPS Specificity in communities of Symbiodinium in corals from Johnston Atoll	ITS2 primers: ITSD and ITS2rev2, cloning & sequencing of PCR products; verification of intragenomic variants & pseudogenes			ITSD and ITS2rev2
5514	Acropora cytherea	ITS2	Cladocopium C3.11	C3.11		Johnston Atoll, Hawaii	Eastern Indo-Pacific	Hawaii	Hawaii	3	7	18.078	-169.533	GenBank	GenBank	Cloning of ITS2 & sequencing, verification of clones	6	2006	6	2006	Stat 2009 MEPS Specificity in communities of Symbiodinium in corals from Johnston Atoll	ITS2 primers: ITSD and ITS2rev2, cloning & sequencing of PCR products; verification of intragenomic variants & pseudogenes			ITSD and ITS2rev2
5499	Acropora cytherea	ITS2	Cladocopium C3.2	C3.2		Johnston Atoll, Hawaii	Eastern Indo-Pacific	Hawaii	Hawaii	5	10	18.078	-169.533	GenBank	GenBank	Cloning of ITS2 & sequencing, verification of clones	6	2006	6	2006	Stat 2009 MEPS Specificity in communities of Symbiodinium in corals from Johnston Atoll	ITS2 primers: ITSD and ITS2rev2, cloning & sequencing of PCR products; verification of intragenomic variants & pseudogenes			ITSD and ITS2rev2
5500	Acropora cytherea	ITS2	Cladocopium C3.2	C3.2		Johnston Atoll, Hawaii	Eastern Indo-Pacific	Hawaii	Hawaii	5	10	18.078	-169.533	GenBank	GenBank	Cloning of ITS2 & sequencing, verification of clones	6	2006	6	2006	Stat 2009 MEPS Specificity in communities of Symbiodinium in corals from Johnston Atoll	ITS2 primers: ITSD and ITS2rev2, cloning & sequencing of PCR products; verification of intragenomic variants & pseudogenes			ITSD and ITS2rev2
5501	Acropora cytherea	ITS2	Cladocopium C3.2	C3.2		Johnston Atoll, Hawaii	Eastern Indo-Pacific	Hawaii	Hawaii	2	4	18.078	-169.533	GenBank	GenBank	Cloning of ITS2 & sequencing, verification of clones	6	2006	6	2006	Stat 2009 MEPS Specificity in communities of Symbiodinium in corals from Johnston Atoll	ITS2 primers: ITSD and ITS2rev2, cloning & sequencing of PCR products; verification of intragenomic variants & pseudogenes			ITSD and ITS2rev2
5502	Acropora cytherea	ITS2	Cladocopium C3.2	C3.2		Johnston Atoll, Hawaii	Eastern Indo-Pacific	Hawaii	Hawaii	3	7	18.078	-169.533	GenBank	GenBank	Cloning of ITS2 & sequencing, verification of clones	6	2006	6	2006	Stat 2009 MEPS Specificity in communities of Symbiodinium in corals from Johnston Atoll	ITS2 primers: ITSD and ITS2rev2, cloning & sequencing of PCR products; verification of intragenomic variants & pseudogenes			ITSD and ITS2rev2
5503	Acropora cytherea	ITS2	Cladocopium C3.2	C3.2		Johnston Atoll, Hawaii	Eastern Indo-Pacific	Hawaii	Hawaii	3	7	18.078	-169.533	GenBank	GenBank	Cloning of ITS2 & sequencing, verification of clones	6	2006	6	2006	Stat 2009 MEPS Specificity in communities of Symbiodinium in corals from Johnston Atoll	ITS2 primers: ITSD and ITS2rev2, cloning & sequencing of PCR products; verification of intragenomic variants & pseudogenes			ITSD and ITS2rev2
5504	Acropora cytherea	ITS2	Cladocopium C3.2	C3.2		Johnston Atoll, Hawaii	Eastern Indo-Pacific	Hawaii	Hawaii	2	4	18.078	-169.533	GenBank	GenBank	Cloning of ITS2 & sequencing, verification of clones	6	2006	6	2006	Stat 2009 MEPS Specificity in communities of Symbiodinium in corals from Johnston Atoll	ITS2 primers: ITSD and ITS2rev2, cloning & sequencing of PCR products; verification of intragenomic variants & pseudogenes			ITSD and ITS2rev2
5505	Acropora cytherea	ITS2	Cladocopium C3.7	C3.7		Johnston Atoll, Hawaii	Eastern Indo-Pacific	Hawaii	Hawaii	3	7	18.078	-169.533	GenBank	GenBank	Cloning of ITS2 & sequencing, verification of clones	6	2006	6	2006	Stat 2009 MEPS Specificity in communities of Symbiodinium in corals from Johnston Atoll	ITS2 primers: ITSD and ITS2rev2, cloning & sequencing of PCR products; verification of intragenomic variants & pseudogenes			ITSD and ITS2rev2
5506	Acropora cytherea	ITS2	Cladocopium C3.8	C3.8		Johnston Atoll, Hawaii	Eastern Indo-Pacific	Hawaii	Hawaii	5	10	18.078	-169.541	GenBank	GenBank	Cloning of ITS2 & sequencing, verification of clones	6	2006	6	2006	Stat 2009 MEPS Specificity in communities of Symbiodinium in corals from Johnston Atoll	ITS2 primers: ITSD and ITS2rev2, cloning & sequencing of PCR products; verification of intragenomic variants & pseudogenes			ITSD and ITS2rev2
5507	Acropora cytherea	ITS2	Cladocopium C3.8	C3.8		Johnston Atoll, Hawaii	Eastern Indo-Pacific	Hawaii	Hawaii	3	7	18.078	-169.533	GenBank	GenBank	Cloning of ITS2 & sequencing, verification of clones	6	2006	6	2006	Stat 2009 MEPS Specificity in communities of Symbiodinium in corals from Johnston Atoll	ITS2 primers: ITSD and ITS2rev2, cloning & sequencing of PCR products; verification of intragenomic variants & pseudogenes			ITSD and ITS2rev2
5508	Acropora cytherea	ITS2	Cladocopium C3.8	C3.8		Johnston Atoll, Hawaii	Eastern Indo-Pacific	Hawaii	Hawaii	2	4	18.078	-169.533	GenBank	GenBank	Cloning of ITS2 & sequencing, verification of clones	6	2006	6	2006	Stat 2009 MEPS Specificity in communities of Symbiodinium in corals from Johnston Atoll	ITS2 primers: ITSD and ITS2rev2, cloning & sequencing of PCR products; verification of intragenomic variants & pseudogenes			ITSD and ITS2rev2
5509	Acropora cytherea	ITS2	Cladocopium C3.9	C3.9		Johnston Atoll, Hawaii	Eastern Indo-Pacific	Hawaii	Hawaii	5	10	18.078	-169.533	GenBank	GenBank	Cloning of ITS2 & sequencing, verification of clones	6	2006	6	2006	Stat 2009 MEPS Specificity in communities of Symbiodinium in corals from Johnston Atoll	ITS2 primers: ITSD and ITS2rev2, cloning & sequencing of PCR products; verification of intragenomic variants & pseudogenes			ITSD and ITS2rev2
5510	Acropora cytherea	ITS2	Cladocopium C3.9	C3.9		Johnston Atoll, Hawaii	Eastern Indo-Pacific	Hawaii	Hawaii	3	7	18.078	-169.533	GenBank	GenBank	Cloning of ITS2 & sequencing, verification of clones	6	2006	6	2006	Stat 2009 MEPS Specificity in communities of Symbiodinium in corals from Johnston Atoll	ITS2 primers: ITSD and ITS2rev2, cloning & sequencing of PCR products; verification of intragenomic variants & pseudogenes			ITSD and ITS2rev2
5515	Acropora cytherea	ITS2	Cladocopium C3b	C3b		Johnston Atoll, Hawaii	Eastern Indo-Pacific	Hawaii	Hawaii	5	10	18.078	-169.533	GenBank	GenBank	Cloning of ITS2 & sequencing, verification of clones	6	2006	6	2006	Stat 2009 MEPS Specificity in communities of Symbiodinium in corals from Johnston Atoll	ITS2 primers: ITSD and ITS2rev2, cloning & sequencing of PCR products; verification of intragenomic variants & pseudogenes			ITSD and ITS2rev2
2439	Acropora cytherea	ITS2	Cladocopium C3z	C3z		Similan Islands	Western Indo-Pacific	Andaman	Andaman Sea Coral Coast	2	12	8.6525	97.6408	Geosymbio	Geosymbio	DGGE of ITS2 & sequencing	2	2007	2	2007	LaJeunesse 2010 JBiogeograph Long-standing environmental conditions isolation and host–symbiont specificity	ITS2 primers: ITSintfor2 and ITS2Clamp, representative dominant DGGE bands were excised & sequenced.			ITSintfor2 and ITS2Clamp
17213	Acropora cytherea	ITS2	Durusdinium D1	D1		Moorea	Eastern Indo-Pacific	Central Polynesia	Society Islands	2	2	-17.485	-149.834	Original Pub	Original Pub	Cloning of ITS2 & sequencing	NA	NA	NA	NA	Putnam 2012 ProcRSocB Endosymbiotic flexibility associates with environ sensitivity	ITS2 primers: ITS-DINO and ITS2rev2, cloning and sequencing of PCR products			S-DINO and ITS2Rev2
17216	Acropora cytherea	ITS2	Durusdinium D1	D1		Moorea	Eastern Indo-Pacific	Central Polynesia	Society Islands	6	6	-17.485	-149.834	Original Pub	Original Pub	Cloning of ITS2 & sequencing	NA	NA	NA	NA	Putnam 2012 ProcRSocB Endosymbiotic flexibility associates with environ sensitivity	ITS2 primers: ITS-DINO and ITS2rev2, cloning and sequencing of PCR products			S-DINO and ITS2Rev2
17217	Acropora cytherea	ITS2	Durusdinium D1.10	D1.10		Moorea	Eastern Indo-Pacific	Central Polynesia	Society Islands	6	6	-17.485	-149.834	Original Pub	Original Pub	Cloning of ITS2 & sequencing	NA	NA	NA	NA	Putnam 2012 ProcRSocB Endosymbiotic flexibility associates with environ sensitivity	ITS2 primers: ITS-DINO and ITS2rev2, cloning and sequencing of PCR products			S-DINO and ITS2Rev2
17214	Acropora cytherea	ITS2	Durusdinium D1.8	D1.8		Moorea	Eastern Indo-Pacific	Central Polynesia	Society Islands	2	2	-17.485	-149.834	Original Pub	Original Pub	Cloning of ITS2 & sequencing	NA	NA	NA	NA	Putnam 2012 ProcRSocB Endosymbiotic flexibility associates with environ sensitivity	ITS2 primers: ITS-DINO and ITS2rev2, cloning and sequencing of PCR products			S-DINO and ITS2Rev2
17215	Acropora cytherea	ITS2	Durusdinium D1-4	D1-4		Moorea	Eastern Indo-Pacific	Central Polynesia	Society Islands	2	2	-17.485	-149.834	Original Pub	Original Pub	Cloning of ITS2 & sequencing	NA	NA	NA	NA	Putnam 2012 ProcRSocB Endosymbiotic flexibility associates with environ sensitivity	ITS2 primers: ITS-DINO and ITS2rev2, cloning and sequencing of PCR products			S-DINO and ITS2Rev2
17218	Acropora cytherea	ITS2	Durusdinium D1-4	D1-4		Moorea	Eastern Indo-Pacific	Central Polynesia	Society Islands	6	6	-17.485	-149.834	Original Pub	Original Pub	Cloning of ITS2 & sequencing	NA	NA	NA	NA	Putnam 2012 ProcRSocB Endosymbiotic flexibility associates with environ sensitivity	ITS2 primers: ITS-DINO and ITS2rev2, cloning and sequencing of PCR products			S-DINO and ITS2Rev2
17046	Acropora digitifera	ITS2	Cladocopium C1	C1		Port Shelter	Central Indo-Pacific	South China Sea	Southern China	1	5	22.2	114.167	Original pub	Original pub	Direct sequencing of ITS2	6	2013	8	2013	Wong 2016 RegStudMarSci Symbiodinium clade C generality among common scleractinian corals	ITS2 primers: ITSintfor2 and ITS2Clamp, dominant DGGE bands were excised amplified and sequenced.			ITSintfor2 and ITS2Clamp
17047	Acropora digitifera	ITS2	Cladocopium C1	C1		Port Shelter	Central Indo-Pacific	South China Sea	Southern China	1	5	22.2	114.167	Original pub	Original pub	Direct sequencing of ITS2	6	2013	8	2013	Wong 2016 RegStudMarSci Symbiodinium clade C generality among common scleractinian corals	ITS2 primers: ITSintfor2 and ITS2Clamp, dominant DGGE bands were excised amplified and sequenced.			ITSintfor2 and ITS2Clamp
17048	Acropora digitifera	ITS2	Cladocopium C1	C1		Port Shelter	Central Indo-Pacific	South China Sea	Southern China	1	5	22.2	114.167	Original pub	Original pub	Direct sequencing of ITS2	6	2013	8	2013	Wong 2016 RegStudMarSci Symbiodinium clade C generality among common scleractinian corals	ITS2 primers: ITSintfor2 and ITS2Clamp, dominant DGGE bands were excised amplified and sequenced.			ITSintfor2 and ITS2Clamp
17049	Acropora digitifera	ITS2	Cladocopium C1	C1		Port Shelter	Central Indo-Pacific	South China Sea	Southern China	1	5	22.2	114.167	Original pub	Original pub	Direct sequencing of ITS2	6	2013	8	2013	Wong 2016 RegStudMarSci Symbiodinium clade C generality among common scleractinian corals	ITS2 primers: ITSintfor2 and ITS2Clamp, dominant DGGE bands were excised amplified and sequenced.			ITSintfor2 and ITS2Clamp
17050	Acropora digitifera	ITS2	Cladocopium C1	C1		Port Shelter	Central Indo-Pacific	South China Sea	Southern China	1	5	22.2	114.167	Original pub	Original pub	Direct sequencing of ITS2	6	2013	8	2013	Wong 2016 RegStudMarSci Symbiodinium clade C generality among common scleractinian corals	ITS2 primers: ITSintfor2 and ITS2Clamp, dominant DGGE bands were excised amplified and sequenced.			ITSintfor2 and ITS2Clamp
17051	Acropora digitifera	ITS2	Cladocopium C1	C1		Port Shelter	Central Indo-Pacific	South China Sea	Southern China	1	5	22.2	114.167	Original pub	Original pub	Direct sequencing of ITS2	6	2013	8	2013	Wong 2016 RegStudMarSci Symbiodinium clade C generality among common scleractinian corals	ITS2 primers: ITSintfor2 and ITS2Clamp, dominant DGGE bands were excised amplified and sequenced.			ITSintfor2 and ITS2Clamp
17052	Acropora digitifera	ITS2	Cladocopium C1	C1		Port Shelter	Central Indo-Pacific	South China Sea	Southern China	1	5	22.2	114.167	Original pub	Original pub	Direct sequencing of ITS2	6	2013	8	2013	Wong 2016 RegStudMarSci Symbiodinium clade C generality among common scleractinian corals	ITS2 primers: ITSintfor2 and ITS2Clamp, dominant DGGE bands were excised amplified and sequenced.			ITSintfor2 and ITS2Clamp
17053	Acropora digitifera	ITS2	Cladocopium C1	C1		Port Shelter	Central Indo-Pacific	South China Sea	Southern China	1	5	22.2	114.167	Original pub	Original pub	Direct sequencing of ITS2	6	2013	8	2013	Wong 2016 RegStudMarSci Symbiodinium clade C generality among common scleractinian corals	ITS2 primers: ITSintfor2 and ITS2Clamp, dominant DGGE bands were excised amplified and sequenced.			ITSintfor2 and ITS2Clamp
17054	Acropora digitifera	ITS2	Cladocopium C1	C1		Port Shelter	Central Indo-Pacific	South China Sea	Southern China	1	5	22.2	114.167	Original pub	Original pub	Direct sequencing of ITS2	6	2013	8	2013	Wong 2016 RegStudMarSci Symbiodinium clade C generality among common scleractinian corals	ITS2 primers: ITSintfor2 and ITS2Clamp, dominant DGGE bands were excised amplified and sequenced.			ITSintfor2 and ITS2Clamp
17230	Acropora digitifera	ITS2	Cladocopium C1.1	C1.1		Moorea	Eastern Indo-Pacific	Central Polynesia	Society Islands	9	9	-17.475	-149.837	Original Pub	Original Pub	Cloning of ITS2 & sequencing	NA	NA	NA	NA	Putnam 2012 ProcRSocB Endosymbiotic flexibility associates with environ sensitivity	ITS2 primers: ITS-DINO and ITS2rev2, cloning and sequencing of PCR products			S-DINO and ITS2Rev2
17236	Acropora digitifera	ITS2	Cladocopium C1.15	C1.15		Moorea	Eastern Indo-Pacific	Central Polynesia	Society Islands	9	9	-17.475	-149.837	Original Pub	Original Pub	Cloning of ITS2 & sequencing	NA	NA	NA	NA	Putnam 2012 ProcRSocB Endosymbiotic flexibility associates with environ sensitivity	ITS2 primers: ITS-DINO and ITS2rev2, cloning and sequencing of PCR products			S-DINO and ITS2Rev2
17235	Acropora digitifera	ITS2	Cladocopium C21.12	C21.12		Moorea	Eastern Indo-Pacific	Central Polynesia	Society Islands	9	9	-17.475	-149.837	Original Pub	Original Pub	Cloning of ITS2 & sequencing	NA	NA	NA	NA	Putnam 2012 ProcRSocB Endosymbiotic flexibility associates with environ sensitivity	ITS2 primers: ITS-DINO and ITS2rev2, cloning and sequencing of PCR products			S-DINO and ITS2Rev2
17240	Acropora digitifera	ITS2	Cladocopium C21.12	C21.12		Moorea	Eastern Indo-Pacific	Central Polynesia	Society Islands	9	9	-17.475	-149.837	Original Pub	Original Pub	Cloning of ITS2 & sequencing	NA	NA	NA	NA	Putnam 2012 ProcRSocB Endosymbiotic flexibility associates with environ sensitivity	ITS2 primers: ITS-DINO and ITS2rev2, cloning and sequencing of PCR products			S-DINO and ITS2Rev2
3126	Acropora digitifera	ITS2	Cladocopium C3	C3		Heron Island, GBR	Central Indo-Pacific	Northeast Australian Shelf	Central and Southern GBR	3	3	-23	152	Aquarist	Riddle 2011, Advanced Aquarist, Advanced Aquarist	DGGE of ITS2 & sequencing	2	2002	3	2002	LaJeunesse 2003 LimnolOceanogr Low symbiont diversity in southern Great Barrier Reef	ITS2 primers: ITSintfor2 and ITS2Clamp, representative dominant DGGE bands were excised & sequenced.			ITSintfor2 and ITS2Clamp
2960	Acropora digitifera	ITS2	Cladocopium C3	C3		Zamami Island, Japan	Central Indo-Pacific	South Kuroshio	South Kuroshio	1	10	26.2346	127.305	Aquarist	Riddle 2011, Advanced Aquarist, Advanced Aquarist	DGGE of ITS2 & sequencing	3	2002	3	2002	LaJeunesse 2004 MEPS Closely related Symbiodinium spp differ in relative dominance	ITS2 primers: ITSintfor2 and ITS2Clamp, representative dominant DGGE bands were excised & sequenced.			ITSintfor2 and ITS2Clamp
2961	Acropora digitifera	ITS2	Cladocopium C3	C3		Zamami Island, Japan	Central Indo-Pacific	South Kuroshio	South Kuroshio	1	10	26.2346	127.305	Aquarist	Riddle 2011, Advanced Aquarist, Advanced Aquarist	DGGE of ITS2 & sequencing	3	2002	3	2002	LaJeunesse 2004 MEPS Closely related Symbiodinium spp differ in relative dominance	ITS2 primers: ITSintfor2 and ITS2Clamp, representative dominant DGGE bands were excised & sequenced.			ITSintfor2 and ITS2Clamp
17219	Acropora digitifera	ITS2	Cladocopium C3	C3		Moorea	Eastern Indo-Pacific	Central Polynesia	Society Islands	20	20	-17.5475	-149.769	Original Pub	Original Pub	Cloning of ITS2 & sequencing	NA	NA	NA	NA	Putnam 2012 ProcRSocB Endosymbiotic flexibility associates with environ sensitivity	ITS2 primers: ITS-DINO and ITS2rev2, cloning and sequencing of PCR products			S-DINO and ITS2Rev2
17224	Acropora digitifera	ITS2	Cladocopium C3	C3		Moorea	Eastern Indo-Pacific	Central Polynesia	Society Islands	18	18	-17.5475	-149.769	Original Pub	Original Pub	Cloning of ITS2 & sequencing	NA	NA	NA	NA	Putnam 2012 ProcRSocB Endosymbiotic flexibility associates with environ sensitivity	ITS2 primers: ITS-DINO and ITS2rev2, cloning and sequencing of PCR products			S-DINO and ITS2Rev2
17228	Acropora digitifera	ITS2	Cladocopium C3	C3		Moorea	Eastern Indo-Pacific	Central Polynesia	Society Islands	20	20	-17.5475	-149.769	Original Pub	Original Pub	Cloning of ITS2 & sequencing	NA	NA	NA	NA	Putnam 2012 ProcRSocB Endosymbiotic flexibility associates with environ sensitivity	ITS2 primers: ITS-DINO and ITS2rev2, cloning and sequencing of PCR products			S-DINO and ITS2Rev2
17231	Acropora digitifera	ITS2	Cladocopium C3	C3		Moorea	Eastern Indo-Pacific	Central Polynesia	Society Islands	9	9	-17.475	-149.837	Original Pub	Original Pub	Cloning of ITS2 & sequencing	NA	NA	NA	NA	Putnam 2012 ProcRSocB Endosymbiotic flexibility associates with environ sensitivity	ITS2 primers: ITS-DINO and ITS2rev2, cloning and sequencing of PCR products			S-DINO and ITS2Rev2
17237	Acropora digitifera	ITS2	Cladocopium C3	C3		Moorea	Eastern Indo-Pacific	Central Polynesia	Society Islands	9	9	-17.475	-149.837	Original Pub	Original Pub	Cloning of ITS2 & sequencing	NA	NA	NA	NA	Putnam 2012 ProcRSocB Endosymbiotic flexibility associates with environ sensitivity	ITS2 primers: ITS-DINO and ITS2rev2, cloning and sequencing of PCR products			S-DINO and ITS2Rev2
15128	Acropora digitifera	ITS2	Cladocopium C3	C3		Ximao Island (Xidao on Google Maps)	Central Indo-Pacific	South China Sea	Gulf of Tonkin	1	10	18.2353	109.374	Original pub	Original pub	DGGE of ITS2 & sequencing	10	2008	10	2008	Zhou 2011 JSysEvol Low genetic diversity of symbiotic dinoflagellates	ITS2 primers: ITSintfor2 and ITS2Clamp, dominant DGGE bands were excised amplified and sequenced.			ITSintfor2 and ITS2Clamp
17220	Acropora digitifera	ITS2	Cladocopium C3.18	C3.18		Moorea	Eastern Indo-Pacific	Central Polynesia	Society Islands	20	20	-17.5475	-149.769	Original Pub	Original Pub	Cloning of ITS2 & sequencing	NA	NA	NA	NA	Putnam 2012 ProcRSocB Endosymbiotic flexibility associates with environ sensitivity	ITS2 primers: ITS-DINO and ITS2rev2, cloning and sequencing of PCR products			S-DINO and ITS2Rev2
17225	Acropora digitifera	ITS2	Cladocopium C3.20	C3.20		Moorea	Eastern Indo-Pacific	Central Polynesia	Society Islands	18	18	-17.5475	-149.769	Original Pub	Original Pub	Cloning of ITS2 & sequencing	NA	NA	NA	NA	Putnam 2012 ProcRSocB Endosymbiotic flexibility associates with environ sensitivity	ITS2 primers: ITS-DINO and ITS2rev2, cloning and sequencing of PCR products			S-DINO and ITS2Rev2
17227	Acropora digitifera	ITS2	Cladocopium C3.20	C3.20		Moorea	Eastern Indo-Pacific	Central Polynesia	Society Islands	20	20	-17.5475	-149.769	Original Pub	Original Pub	Cloning of ITS2 & sequencing	NA	NA	NA	NA	Putnam 2012 ProcRSocB Endosymbiotic flexibility associates with environ sensitivity	ITS2 primers: ITS-DINO and ITS2rev2, cloning and sequencing of PCR products			S-DINO and ITS2Rev2
17233	Acropora digitifera	ITS2	Cladocopium C3.21	C3.21		Moorea	Eastern Indo-Pacific	Central Polynesia	Society Islands	9	9	-17.475	-149.837	Original Pub	Original Pub	Cloning of ITS2 & sequencing	NA	NA	NA	NA	Putnam 2012 ProcRSocB Endosymbiotic flexibility associates with environ sensitivity	ITS2 primers: ITS-DINO and ITS2rev2, cloning and sequencing of PCR products			S-DINO and ITS2Rev2
17221	Acropora digitifera	ITS2	Cladocopium C3.23	C3.23		Moorea	Eastern Indo-Pacific	Central Polynesia	Society Islands	20	20	-17.5475	-149.769	Original Pub	Original Pub	Cloning of ITS2 & sequencing	NA	NA	NA	NA	Putnam 2012 ProcRSocB Endosymbiotic flexibility associates with environ sensitivity	ITS2 primers: ITS-DINO and ITS2rev2, cloning and sequencing of PCR products			S-DINO and ITS2Rev2
17238	Acropora digitifera	ITS2	Cladocopium C3.23	C3.23		Moorea	Eastern Indo-Pacific	Central Polynesia	Society Islands	9	9	-17.475	-149.837	Original Pub	Original Pub	Cloning of ITS2 & sequencing	NA	NA	NA	NA	Putnam 2012 ProcRSocB Endosymbiotic flexibility associates with environ sensitivity	ITS2 primers: ITS-DINO and ITS2rev2, cloning and sequencing of PCR products			S-DINO and ITS2Rev2
17229	Acropora digitifera	ITS2	Cladocopium C3.24	C3.24		Moorea	Eastern Indo-Pacific	Central Polynesia	Society Islands	20	20	-17.5475	-149.769	Original Pub	Original Pub	Cloning of ITS2 & sequencing	NA	NA	NA	NA	Putnam 2012 ProcRSocB Endosymbiotic flexibility associates with environ sensitivity	ITS2 primers: ITS-DINO and ITS2rev2, cloning and sequencing of PCR products			S-DINO and ITS2Rev2
17234	Acropora digitifera	ITS2	Cladocopium C3.24	C3.24		Moorea	Eastern Indo-Pacific	Central Polynesia	Society Islands	9	9	-17.475	-149.837	Original Pub	Original Pub	Cloning of ITS2 & sequencing	NA	NA	NA	NA	Putnam 2012 ProcRSocB Endosymbiotic flexibility associates with environ sensitivity	ITS2 primers: ITS-DINO and ITS2rev2, cloning and sequencing of PCR products			S-DINO and ITS2Rev2
17239	Acropora digitifera	ITS2	Cladocopium C3.24	C3.24		Moorea	Eastern Indo-Pacific	Central Polynesia	Society Islands	9	9	-17.475	-149.837	Original Pub	Original Pub	Cloning of ITS2 & sequencing	NA	NA	NA	NA	Putnam 2012 ProcRSocB Endosymbiotic flexibility associates with environ sensitivity	ITS2 primers: ITS-DINO and ITS2rev2, cloning and sequencing of PCR products			S-DINO and ITS2Rev2
17226	Acropora digitifera	ITS2	Cladocopium C3b	C3b		Moorea	Eastern Indo-Pacific	Central Polynesia	Society Islands	20	20	-17.5475	-149.769	Original Pub	Original Pub	Cloning of ITS2 & sequencing	NA	NA	NA	NA	Putnam 2012 ProcRSocB Endosymbiotic flexibility associates with environ sensitivity	ITS2 primers: ITS-DINO and ITS2rev2, cloning and sequencing of PCR products			S-DINO and ITS2Rev2
17232	Acropora digitifera	ITS2	Cladocopium C3b	C3b		Moorea	Eastern Indo-Pacific	Central Polynesia	Society Islands	9	9	-17.475	-149.837	Original Pub	Original Pub	Cloning of ITS2 & sequencing	NA	NA	NA	NA	Putnam 2012 ProcRSocB Endosymbiotic flexibility associates with environ sensitivity	ITS2 primers: ITS-DINO and ITS2rev2, cloning and sequencing of PCR products			S-DINO and ITS2Rev2
2963	Acropora digitifera	ITS2	Cladocopium C3i	C3i		Curaçao Island	Central Indo-Pacific	Northeast Australian Shelf	Central and Southern Great Barrier Reef	1	8	-18.67	146.549	Aquarist	Riddle 2011, Advanced Aquarist, Advanced Aquarist	DGGE of ITS2 & sequencing	5	2003	5	2003	LaJeunesse 2004 MEPS Closely related Symbiodinium spp differ in relative dominance	ITS2 primers: ITSintfor2 and ITS2Clamp, representative dominant DGGE bands were excised & sequenced.			ITSintfor2 and ITS2Clamp
2964	Acropora digitifera	ITS2	Cladocopium C3i	C3i		Curaçao Island	Central Indo-Pacific	Northeast Australian Shelf	Central and Southern Great Barrier Reef	1	8	-18.67	146.549	Aquarist	Riddle 2011, Advanced Aquarist, Advanced Aquarist	DGGE of ITS2 & sequencing	5	2003	5	2003	LaJeunesse 2004 MEPS Closely related Symbiodinium spp differ in relative dominance	ITS2 primers: ITSintfor2 and ITS2Clamp, representative dominant DGGE bands were excised & sequenced.			ITSintfor2 and ITS2Clamp
2962	Acropora digitifera	ITS2	Cladocopium C3k	C3k		Rib Reef GBR	Central Indo-Pacific	Northeast Australian Shelf	Central and Southern Great Barrier Reef	1	8	-18.4781	146.871	Aquarist	Riddle 2011, Advanced Aquarist, Advanced Aquarist	DGGE of ITS2 & sequencing	5	2003	5	2003	LaJeunesse 2004 MEPS Closely related Symbiodinium spp differ in relative dominance	ITS2 primers: ITSintfor2 and ITS2Clamp, representative dominant DGGE bands were excised & sequenced.			ITSintfor2 and ITS2Clamp
2440	Acropora digitifera	ITS2	Cladocopium C3u	C3u		Cape Panwa	Western Indo-Pacific	Andaman	Andaman Sea Coral Coast	0	5	7.8073	98.4092	Geosymbio	Geosymbio	DGGE of ITS2 & sequencing	2	2007	2	2007	LaJeunesse 2010 JBiogeograph Long-standing environmental conditions isolation and host–symbiont specificity	ITS2 primers: ITSintfor2 and ITS2Clamp, representative dominant DGGE bands were excised & sequenced.			ITSintfor2 and ITS2Clamp
2441	Acropora digitifera	ITS2	Cladocopium C3u	C3u		Cape Panwa	Western Indo-Pacific	Andaman	Andaman Sea Coral Coast	0	5	7.8073	98.4092	Geosymbio	Geosymbio	DGGE of ITS2 & sequencing	2	2007	2	2007	LaJeunesse 2010 JBiogeograph Long-standing environmental conditions isolation and host–symbiont specificity	ITS2 primers: ITSintfor2 and ITS2Clamp, representative dominant DGGE bands were excised & sequenced.			ITSintfor2 and ITS2Clamp
17222	Acropora digitifera	ITS2	Durusdinium D1	D1		Moorea	Eastern Indo-Pacific	Central Polynesia	Society Islands	20	20	-17.5475	-149.769	Original Pub	Original Pub	Cloning of ITS2 & sequencing	NA	NA	NA	NA	Putnam 2012 ProcRSocB Endosymbiotic flexibility associates with environ sensitivity	ITS2 primers: ITS-DINO and ITS2rev2, cloning and sequencing of PCR products			S-DINO and ITS2Rev2
17241	Acropora digitifera	ITS2	Durusdinium D1	D1		Moorea	Eastern Indo-Pacific	Central Polynesia	Society Islands	9	9	-17.475	-149.837	Original Pub	Original Pub	Cloning of ITS2 & sequencing	NA	NA	NA	NA	Putnam 2012 ProcRSocB Endosymbiotic flexibility associates with environ sensitivity	ITS2 primers: ITS-DINO and ITS2rev2, cloning and sequencing of PCR products			S-DINO and ITS2Rev2
2442	Acropora digitifera	ITS2	Durusdinium D1-4	D1-4		Cape Panwa	Western Indo-Pacific	Andaman	Andaman Sea Coral Coast	0	5	7.8073	98.4092	Geosymbio	Geosymbio	DGGE of ITS2 & sequencing	2	2007	2	2007	LaJeunesse 2010 JBiogeograph Long-standing environmental conditions isolation and host–symbiont specificity	ITS2 primers: ITSintfor2 and ITS2Clamp, representative dominant DGGE bands were excised & sequenced.			ITSintfor2 and ITS2Clamp
17223	Acropora digitifera	ITS2	Durusdinium D1-4	D1-4		Moorea	Eastern Indo-Pacific	Central Polynesia	Society Islands	20	20	-17.5475	-149.769	Original Pub	Original Pub	Cloning of ITS2 & sequencing	NA	NA	NA	NA	Putnam 2012 ProcRSocB Endosymbiotic flexibility associates with environ sensitivity	ITS2 primers: ITS-DINO and ITS2rev2, cloning and sequencing of PCR products			S-DINO and ITS2Rev2
8149	Acropora gemmifera	ITS2	Cladocopium C109b	C109b		Zanzibar	Western Indo-Pacific	Western Indian Ocean	East African Coral Coast	1	7	-6.15262	39.136	Direct from publication	Direct from publication	DGGE of ITS2 & sequencing	4	2008	4	2008	Chauka 2012 WIndOceaJMarSci Diversity of Symbiodinium in Tanzania	ITS2 primers: ITSintfor2 and ITSintrev2, dominant bands were excised & sequenced. Intragenomic variants identified.			ITSintfor2 and ITSintrev2
8934	Acropora gemmifera	ITS2	Cladocopium C109b	C109b		Changuu	Western Indo-Pacific	Western Indian Ocean	East African Coral Coast	2	6	-6.12007	39.1681	Geosymbio	Geosymbio	DGGE of ITS2 & sequencing	4	2007	4	2007	LaJeunesse 2010 JBiogeograph Long-standing environmental conditions isolation and host–symbiont specificity	ITS2 primers: ITSintfor2 and ITS2Clamp, representative dominant DGGE bands were excised & sequenced.			ITSintfor2 and ITS2Clamp
9826	Acropora gemmifera	ITS2	Cladocopium C3	C3		Orpheus Island, GBR	Central Indo-Pacific	Northeast Australian Shelf	Central and Southern GBR	NA	NA	-18.6061	146.491	Original pub	Original pub	SSCP of ITS1	NA	2003	NA	2006	Abrego 2009 MolEcol Highly infectious symbiont dominates	ITS1 Primers: symITSFP and SymITSRP; SSCP sensitivity ~10%; single SSCP band for most samples; few samples w >1 band were reported as mixed Symbio types		symITSFP and SymITSRP
9827	Acropora gemmifera	ITS2	Cladocopium C3	C3		Orpheus Island, GBR	Central Indo-Pacific	Northeast Australian Shelf	Central and Southern GBR	NA	NA	-18.6061	146.491	Original pub	Original pub	SSCP of ITS1	NA	2003	NA	2006	Abrego 2009 MolEcol Highly infectious symbiont dominates	ITS1 Primers: symITSFP and SymITSRP; SSCP sensitivity ~10%; single SSCP band for most samples; few samples w >1 band were reported as mixed Symbio types		symITSFP and SymITSRP
9828	Acropora gemmifera	ITS2	Cladocopium C3	C3		Orpheus Island, GBR	Central Indo-Pacific	Northeast Australian Shelf	Central and Southern GBR	NA	NA	-18.6061	146.491	Original pub	Original pub	SSCP of ITS1	NA	2003	NA	2006	Abrego 2009 MolEcol Highly infectious symbiont dominates	ITS1 Primers: symITSFP and SymITSRP; SSCP sensitivity ~10%; single SSCP band for most samples; few samples w >1 band were reported as mixed Symbio types		symITSFP and SymITSRP
16040	Acropora gemmifera	ITS2	Cladocopium C3	C3		Vohemar	Western Indo-Pacific	Western Indian Ocean	Western and Northern Madagascar	1	30	-13.4	50	Original publication	Original publication	DGGE of ITS2 & sequencing	9	2001	9	2001	Boonstra 2011 Diss Latitudinal Patterns in the Distribution of Algal Symbionts	ITS2 primers: ITSintfor2 and ITS2Clamp, dominant bands of each characteristic profile were excised & sequenced. Variants co-occuring with main bands were identified.			ITSintfor2 and ITS2Clamp
16041	Acropora gemmifera	ITS2	Cladocopium C3	C3		Vohemar	Western Indo-Pacific	Western Indian Ocean	Western and Northern Madagascar	1	30	-13.4	50	Original publication	Original publication	DGGE of ITS2 & sequencing	9	2001	9	2001	Boonstra 2011 Diss Latitudinal Patterns in the Distribution of Algal Symbionts	ITS2 primers: ITSintfor2 and ITS2Clamp, dominant bands of each characteristic profile were excised & sequenced. Variants co-occuring with main bands were identified.			ITSintfor2 and ITS2Clamp
8798	Acropora gemmifera	ITS2	Cladocopium C3	C3		Heron Island, GBR	Central Indo-Pacific	Northeast Australian Shelf	Central and Southern GBR	10	10	-23	152	Original pub	Original pub	DGGE of ITS2 & sequencing	2	2002	3	2002	LaJeunesse 2003 LimnolOceanogr Low symbiont diversity in southern Great Barrier Reef	ITS2 primers: ITSintfor2 and ITS2Clamp, representative dominant DGGE bands were excised & sequenced.			ITSintfor2 and ITS2Clamp
9641	Acropora gemmifera	ITS2	Cladocopium C3i	C3i		Curaçao Island	Central Indo-Pacific	Northeast Australian Shelf	Central and Southern Great Barrier Reef	1	6	-18.67	146.549	Riddle 2011	Riddle 2011, Advanced Aquarist	DGGE of ITS2 & sequencing	5	2003	5	2003	LaJeunesse 2004 MEPS Closely related Symbiodinium spp differ in relative dominance	ITS2 primers: ITSintfor2 and ITS2Clamp, representative dominant DGGE bands were excised & sequenced.			ITSintfor2 and ITS2Clamp
9454	Acropora gemmifera	ITS2	Cladocopium C3i	C3i		Trunk Reef, GBR	Central Indo-Pacific	Northeast Australian Shelf	Central and Southern GBR	NA	NA	-18.3498	146.827	Original pub	Original pub	SSCP of ITS1	NA	1998	NA	1998	van Oppen 2001 ProcRSocB Patterns of coral–dinoflagellate associations in Acropora	ITS1 Primers: symITSFP and SymITSRP; SSCP analysis and sequencing			symITSFP and SymITSRP
9455	Acropora gemmifera	ITS2	Cladocopium C3i	C3i		Trunk Reef, GBR	Central Indo-Pacific	Northeast Australian Shelf	Central and Southern GBR	NA	NA	-18.3498	146.827	Original pub	Original pub	SSCP of ITS1	NA	1998	NA	1998	van Oppen 2001 ProcRSocB Patterns of coral–dinoflagellate associations in Acropora	ITS1 Primers: symITSFP and SymITSRP; SSCP analysis and sequencing			symITSFP and SymITSRP
9456	Acropora gemmifera	ITS2	Cladocopium C3i	C3i		Trunk Reef, GBR	Central Indo-Pacific	Northeast Australian Shelf	Central and Southern GBR	NA	NA	-18.3498	146.827	Original pub	Original pub	SSCP of ITS1	NA	1998	NA	1998	van Oppen 2001 ProcRSocB Patterns of coral–dinoflagellate associations in Acropora	ITS1 Primers: symITSFP and SymITSRP; SSCP analysis and sequencing			symITSFP and SymITSRP
9457	Acropora gemmifera	ITS2	Cladocopium C3i	C3i		Trunk Reef, GBR	Central Indo-Pacific	Northeast Australian Shelf	Central and Southern GBR	NA	NA	-18.3498	146.827	Original pub	Original pub	SSCP of ITS1	NA	1998	NA	1998	van Oppen 2001 ProcRSocB Patterns of coral–dinoflagellate associations in Acropora	ITS1 Primers: symITSFP and SymITSRP; SSCP analysis and sequencing			symITSFP and SymITSRP
8143	Acropora gemmifera	ITS2	Cladocopium C3u	C3u		Tanga	Western Indo-Pacific	Western Indian Ocean	East African Coral Coast	1	7	-5.15382	39.115	Direct from publication	Direct from publication	DGGE of ITS2 & sequencing	8	2008	8	2008	Chauka 2012 WIndOceaJMarSci Diversity of Symbiodinium in Tanzania	ITS2 primers: ITSintfor2 and ITSintrev2, dominant bands were excised & sequenced. Intragenomic variants identified.			ITSintfor2 and ITSintrev2
8144	Acropora gemmifera	ITS2	Cladocopium C3u	C3u		Tanga	Western Indo-Pacific	Western Indian Ocean	East African Coral Coast	1	7	-5.15382	39.115	Direct from publication	Direct from publication	DGGE of ITS2 & sequencing	8	2008	8	2008	Chauka 2012 WIndOceaJMarSci Diversity of Symbiodinium in Tanzania	ITS2 primers: ITSintfor2 and ITSintrev2, dominant bands were excised & sequenced. Intragenomic variants identified.			ITSintfor2 and ITSintrev2
8145	Acropora gemmifera	ITS2	Cladocopium C3u	C3u		Tanga	Western Indo-Pacific	Western Indian Ocean	East African Coral Coast	1	7	-5.15382	39.115	Direct from publication	Direct from publication	DGGE of ITS2 & sequencing	8	2008	8	2008	Chauka 2012 WIndOceaJMarSci Diversity of Symbiodinium in Tanzania	ITS2 primers: ITSintfor2 and ITSintrev2, dominant bands were excised & sequenced. Intragenomic variants identified.			ITSintfor2 and ITSintrev2
8146	Acropora gemmifera	ITS2	Cladocopium C3u	C3u		Tanga	Western Indo-Pacific	Western Indian Ocean	East African Coral Coast	1	7	-5.15382	39.115	Direct from publication	Direct from publication	DGGE of ITS2 & sequencing	8	2008	8	2008	Chauka 2012 WIndOceaJMarSci Diversity of Symbiodinium in Tanzania	ITS2 primers: ITSintfor2 and ITSintrev2, dominant bands were excised & sequenced. Intragenomic variants identified.			ITSintfor2 and ITSintrev2
8147	Acropora gemmifera	ITS2	Cladocopium C3u	C3u		Tanga	Western Indo-Pacific	Western Indian Ocean	East African Coral Coast	1	7	-5.15382	39.115	Direct from publication	Direct from publication	DGGE of ITS2 & sequencing	8	2008	8	2008	Chauka 2012 WIndOceaJMarSci Diversity of Symbiodinium in Tanzania	ITS2 primers: ITSintfor2 and ITSintrev2, dominant bands were excised & sequenced. Intragenomic variants identified.			ITSintfor2 and ITSintrev2
8148	Acropora gemmifera	ITS2	Cladocopium C3u	C3u		Tanga	Western Indo-Pacific	Western Indian Ocean	East African Coral Coast	1	7	-5.15382	39.115	Direct from publication	Direct from publication	DGGE of ITS2 & sequencing	8	2008	8	2008	Chauka 2012 WIndOceaJMarSci Diversity of Symbiodinium in Tanzania	ITS2 primers: ITSintfor2 and ITSintrev2, dominant bands were excised & sequenced. Intragenomic variants identified.			ITSintfor2 and ITSintrev2
15495	Acropora gemmifera	ITS2	Cladocopium C3z	C3z		Nosy Bé	Western Indo-Pacific	Western Indian Ocean	Western and Northern Madagascar	1	30	-13.4	48	Original publication	Original publication	DGGE of ITS2 & sequencing	9	2001	9	2001	Boonstra 2011 Diss Latitudinal Patterns in the Distribution of Algal Symbionts	ITS2 primers: ITSintfor2 and ITS2Clamp, dominant bands of each characteristic profile were excised & sequenced. Variants co-occuring with main bands were identified.			ITSintfor2 and ITS2Clamp
8935	Acropora gemmifera	ITS2	Cladocopium C3z	C3z		Racha	Western Indo-Pacific	Andaman	Andaman Sea Coral Coast	2	5	7.6101	98.3706	Geosymbio	Geosymbio	DGGE of ITS2 & sequencing	2	2007	2	2007	LaJeunesse 2010 JBiogeograph Long-standing environmental conditions isolation and host–symbiont specificity	ITS2 primers: ITSintfor2 and ITS2Clamp, representative dominant DGGE bands were excised & sequenced.			ITSintfor2 and ITS2Clamp
8936	Acropora gemmifera	ITS2	Cladocopium C3z	C3z		Similan Islands	Western Indo-Pacific	Andaman	Andaman Sea Coral Coast	2	12	8.6525	97.6408	Geosymbio	Geosymbio	DGGE of ITS2 & sequencing	2	2007	2	2007	LaJeunesse 2010 JBiogeograph Long-standing environmental conditions isolation and host–symbiont specificity	ITS2 primers: ITSintfor2 and ITS2Clamp, representative dominant DGGE bands were excised & sequenced.			ITSintfor2 and ITS2Clamp
16042	Acropora humilis	ITS2	Symbiodinium A1	A1		Vohemar	Western Indo-Pacific	Western Indian Ocean	Western and Northern Madagascar	1	30	-13.4	50	Original publication	Original publication	DGGE of ITS2 & sequencing	9	2001	9	2001	Boonstra 2011 Diss Latitudinal Patterns in the Distribution of Algal Symbionts	ITS2 primers: ITSintfor2 and ITS2Clamp, dominant bands of each characteristic profile were excised & sequenced. Variants co-occuring with main bands were identified.			ITSintfor2 and ITS2Clamp
16680	Acropora humilis	ITS2	Symbiodinium A1	A1		French Frigate Shoals	Eastern Indo-Pacific	Hawaii	Hawaii	10	20	23.7592	-164.807	Original pub	Original pub	Cloning of ITS2 & sequencing	NA	2005	NA	2009	Stat 2015 CoralReefs Geographic structure and host specificity	ITS2 primers: ITSD and ITS2rev2, cloning & sequencing of PCR products; verification of intragenomic variants & pseudogenes			ITSD and ITS2rev2
16681	Acropora humilis	ITS2	Symbiodinium A1	A1		French Frigate Shoals	Eastern Indo-Pacific	Hawaii	Hawaii	10	20	23.7592	-164.807	Original pub	Original pub	Cloning of ITS2 & sequencing	NA	2005	NA	2009	Stat 2015 CoralReefs Geographic structure and host specificity	ITS2 primers: ITSD and ITS2rev2, cloning & sequencing of PCR products; verification of intragenomic variants & pseudogenes			ITSD and ITS2rev2
16682	Acropora humilis	ITS2	Symbiodinium A1	A1		French Frigate Shoals	Eastern Indo-Pacific	Hawaii	Hawaii	10	20	23.7592	-164.807	Original pub	Original pub	Cloning of ITS2 & sequencing	NA	2005	NA	2009	Stat 2015 CoralReefs Geographic structure and host specificity	ITS2 primers: ITSD and ITS2rev2, cloning & sequencing of PCR products; verification of intragenomic variants & pseudogenes			ITSD and ITS2rev2
15848	Acropora humilis	ITS2	Cladocopium C1	C1		Tuléar	Western Indo-Pacific	Western Indian Ocean	Western and Northern Madagascar	1	30	-23.3	43.6	Original publication	Original publication	DGGE of ITS2 & sequencing	3	2007	3	2007	Boonstra 2011 Diss Latitudinal Patterns in the Distribution of Algal Symbionts	ITS2 primers: ITSintfor2 and ITS2Clamp, dominant bands of each characteristic profile were excised & sequenced. Variants co-occuring with main bands were identified.			ITSintfor2 and ITS2Clamp
15849	Acropora humilis	ITS2	Cladocopium C1	C1		Tuléar	Western Indo-Pacific	Western Indian Ocean	Western and Northern Madagascar	1	30	-23.3	43.6	Original publication	Original publication	DGGE of ITS2 & sequencing	3	2007	3	2007	Boonstra 2011 Diss Latitudinal Patterns in the Distribution of Algal Symbionts	ITS2 primers: ITSintfor2 and ITS2Clamp, dominant bands of each characteristic profile were excised & sequenced. Variants co-occuring with main bands were identified.			ITSintfor2 and ITS2Clamp
15850	Acropora humilis	ITS2	Cladocopium C1	C1		Tuléar	Western Indo-Pacific	Western Indian Ocean	Western and Northern Madagascar	1	30	-23.3	43.6	Original publication	Original publication	DGGE of ITS2 & sequencing	3	2007	3	2007	Boonstra 2011 Diss Latitudinal Patterns in the Distribution of Algal Symbionts	ITS2 primers: ITSintfor2 and ITS2Clamp, dominant bands of each characteristic profile were excised & sequenced. Variants co-occuring with main bands were identified.			ITSintfor2 and ITS2Clamp
15851	Acropora humilis	ITS2	Cladocopium C1	C1		Tuléar	Western Indo-Pacific	Western Indian Ocean	Western and Northern Madagascar	1	30	-23.3	43.6	Original publication	Original publication	DGGE of ITS2 & sequencing	3	2007	3	2007	Boonstra 2011 Diss Latitudinal Patterns in the Distribution of Algal Symbionts	ITS2 primers: ITSintfor2 and ITS2Clamp, dominant bands of each characteristic profile were excised & sequenced. Variants co-occuring with main bands were identified.			ITSintfor2 and ITS2Clamp
15852	Acropora humilis	ITS2	Cladocopium C1	C1		Tuléar	Western Indo-Pacific	Western Indian Ocean	Western and Northern Madagascar	1	30	-23.3	43.6	Original publication	Original publication	DGGE of ITS2 & sequencing	3	2007	3	2007	Boonstra 2011 Diss Latitudinal Patterns in the Distribution of Algal Symbionts	ITS2 primers: ITSintfor2 and ITS2Clamp, dominant bands of each characteristic profile were excised & sequenced. Variants co-occuring with main bands were identified.			ITSintfor2 and ITS2Clamp
15853	Acropora humilis	ITS2	Cladocopium C1	C1		Tuléar	Western Indo-Pacific	Western Indian Ocean	Western and Northern Madagascar	1	30	-23.3	43.6	Original publication	Original publication	DGGE of ITS2 & sequencing	3	2007	3	2007	Boonstra 2011 Diss Latitudinal Patterns in the Distribution of Algal Symbionts	ITS2 primers: ITSintfor2 and ITS2Clamp, dominant bands of each characteristic profile were excised & sequenced. Variants co-occuring with main bands were identified.			ITSintfor2 and ITS2Clamp
15854	Acropora humilis	ITS2	Cladocopium C1	C1		Tuléar	Western Indo-Pacific	Western Indian Ocean	Western and Northern Madagascar	1	30	-23.3	43.6	Original publication	Original publication	DGGE of ITS2 & sequencing	3	2007	3	2007	Boonstra 2011 Diss Latitudinal Patterns in the Distribution of Algal Symbionts	ITS2 primers: ITSintfor2 and ITS2Clamp, dominant bands of each characteristic profile were excised & sequenced. Variants co-occuring with main bands were identified.			ITSintfor2 and ITS2Clamp
15855	Acropora humilis	ITS2	Cladocopium C1	C1		Tuléar	Western Indo-Pacific	Western Indian Ocean	Western and Northern Madagascar	1	30	-23.3	43.6	Original publication	Original publication	DGGE of ITS2 & sequencing	3	2007	3	2007	Boonstra 2011 Diss Latitudinal Patterns in the Distribution of Algal Symbionts	ITS2 primers: ITSintfor2 and ITS2Clamp, dominant bands of each characteristic profile were excised & sequenced. Variants co-occuring with main bands were identified.			ITSintfor2 and ITS2Clamp
15856	Acropora humilis	ITS2	Cladocopium C1	C1		Tuléar	Western Indo-Pacific	Western Indian Ocean	Western and Northern Madagascar	1	30	-23.3	43.6	Original publication	Original publication	DGGE of ITS2 & sequencing	3	2007	3	2007	Boonstra 2011 Diss Latitudinal Patterns in the Distribution of Algal Symbionts	ITS2 primers: ITSintfor2 and ITS2Clamp, dominant bands of each characteristic profile were excised & sequenced. Variants co-occuring with main bands were identified.			ITSintfor2 and ITS2Clamp
16683	Acropora humilis	ITS2	Cladocopium C1	C1		French Frigate Shoals	Eastern Indo-Pacific	Hawaii	Hawaii	10	20	23.7592	-164.807	Original pub	Original pub	Cloning of ITS2 & sequencing	NA	2005	NA	2009	Stat 2015 CoralReefs Geographic structure and host specificity	ITS2 primers: ITSD and ITS2rev2, cloning & sequencing of PCR products; verification of intragenomic variants & pseudogenes			ITSD and ITS2rev2
16684	Acropora humilis	ITS2	Cladocopium C1	C1		French Frigate Shoals	Eastern Indo-Pacific	Hawaii	Hawaii	10	20	23.7592	-164.807	Original pub	Original pub	Cloning of ITS2 & sequencing	NA	2005	NA	2009	Stat 2015 CoralReefs Geographic structure and host specificity	ITS2 primers: ITSD and ITS2rev2, cloning & sequencing of PCR products; verification of intragenomic variants & pseudogenes			ITSD and ITS2rev2
9458	Acropora humilis	ITS2	Cladocopium C1	C1		Trunk Reef, GBR	Central Indo-Pacific	Northeast Australian Shelf	Central and Southern GBR	NA	NA	-18.3498	146.827	Original pub	Original pub	SSCP of ITS1	NA	1998	NA	1998	van Oppen 2001 ProcRSocB Patterns of coral–dinoflagellate associations in Acropora	ITS1 Primers: symITSFP and SymITSRP; SSCP analysis and sequencing			symITSFP and SymITSRP
2444	Acropora humilis	ITS2	Cladocopium C101	C101		Racha	Western Indo-Pacific	Andaman	Andaman Sea Coral Coast	2	5	7.6101	98.3706	Geosymbio	Geosymbio	DGGE of ITS2 & sequencing	2	2007	2	2007	LaJeunesse 2010 JBiogeograph Long-standing environmental conditions isolation and host–symbiont specificity	ITS2 primers: ITSintfor2 and ITS2Clamp, representative dominant DGGE bands were excised & sequenced.			ITSintfor2 and ITS2Clamp
2445	Acropora humilis	ITS2	Cladocopium C101	C101		Koh Hae	Western Indo-Pacific	Andaman	Andaman Sea Coral Coast	2	6	7.7456	98.3763	Geosymbio	Geosymbio	DGGE of ITS2 & sequencing	2	2007	2	2007	LaJeunesse 2010 JBiogeograph Long-standing environmental conditions isolation and host–symbiont specificity	ITS2 primers: ITSintfor2 and ITS2Clamp, representative dominant DGGE bands were excised & sequenced.			ITSintfor2 and ITS2Clamp
15929	Acropora humilis	ITS2	Cladocopium C115	C115		Tuléar	Western Indo-Pacific	Western Indian Ocean	Western and Northern Madagascar	1	30	-23.3	43.6	Original publication	Original publication	DGGE of ITS2 & sequencing	11	2009	11	2009	Boonstra 2011 Diss Latitudinal Patterns in the Distribution of Algal Symbionts	ITS2 primers: ITSintfor2 and ITS2Clamp, dominant bands of each characteristic profile were excised & sequenced. Variants co-occuring with main bands were identified.			ITSintfor2 and ITS2Clamp
15924	Acropora humilis	ITS2	Cladocopium C1g	C1g		Tuléar	Western Indo-Pacific	Western Indian Ocean	Western and Northern Madagascar	1	30	-23.3	43.6	Original publication	Original publication	DGGE of ITS2 & sequencing	11	2009	11	2009	Boonstra 2011 Diss Latitudinal Patterns in the Distribution of Algal Symbionts	ITS2 primers: ITSintfor2 and ITS2Clamp, dominant bands of each characteristic profile were excised & sequenced. Variants co-occuring with main bands were identified.			ITSintfor2 and ITS2Clamp
15925	Acropora humilis	ITS2	Cladocopium C1g	C1g		Tuléar	Western Indo-Pacific	Western Indian Ocean	Western and Northern Madagascar	1	30	-23.3	43.6	Original publication	Original publication	DGGE of ITS2 & sequencing	11	2009	11	2009	Boonstra 2011 Diss Latitudinal Patterns in the Distribution of Algal Symbionts	ITS2 primers: ITSintfor2 and ITS2Clamp, dominant bands of each characteristic profile were excised & sequenced. Variants co-occuring with main bands were identified.			ITSintfor2 and ITS2Clamp
15926	Acropora humilis	ITS2	Cladocopium C1g	C1g		Tuléar	Western Indo-Pacific	Western Indian Ocean	Western and Northern Madagascar	1	30	-23.3	43.6	Original publication	Original publication	DGGE of ITS2 & sequencing	11	2009	11	2009	Boonstra 2011 Diss Latitudinal Patterns in the Distribution of Algal Symbionts	ITS2 primers: ITSintfor2 and ITS2Clamp, dominant bands of each characteristic profile were excised & sequenced. Variants co-occuring with main bands were identified.			ITSintfor2 and ITS2Clamp
15927	Acropora humilis	ITS2	Cladocopium C1g	C1g		Tuléar	Western Indo-Pacific	Western Indian Ocean	Western and Northern Madagascar	1	30	-23.3	43.6	Original publication	Original publication	DGGE of ITS2 & sequencing	11	2009	11	2009	Boonstra 2011 Diss Latitudinal Patterns in the Distribution of Algal Symbionts	ITS2 primers: ITSintfor2 and ITS2Clamp, dominant bands of each characteristic profile were excised & sequenced. Variants co-occuring with main bands were identified.			ITSintfor2 and ITS2Clamp
15930	Acropora humilis	ITS2	Cladocopium C1g	C1g		Tuléar	Western Indo-Pacific	Western Indian Ocean	Western and Northern Madagascar	1	30	-23.3	43.6	Original publication	Original publication	DGGE of ITS2 & sequencing	11	2009	11	2009	Boonstra 2011 Diss Latitudinal Patterns in the Distribution of Algal Symbionts	ITS2 primers: ITSintfor2 and ITS2Clamp, dominant bands of each characteristic profile were excised & sequenced. Variants co-occuring with main bands were identified.			ITSintfor2 and ITS2Clamp
15931	Acropora humilis	ITS2	Cladocopium C1g	C1g		Tuléar	Western Indo-Pacific	Western Indian Ocean	Western and Northern Madagascar	1	30	-23.3	43.6	Original publication	Original publication	DGGE of ITS2 & sequencing	11	2009	11	2009	Boonstra 2011 Diss Latitudinal Patterns in the Distribution of Algal Symbionts	ITS2 primers: ITSintfor2 and ITS2Clamp, dominant bands of each characteristic profile were excised & sequenced. Variants co-occuring with main bands were identified.			ITSintfor2 and ITS2Clamp
16689	Acropora humilis	ITS2	Cladocopium C27	C27		French Frigate Shoals	Eastern Indo-Pacific	Hawaii	Hawaii	10	20	23.7592	-164.807	Original pub	Original pub	Cloning of ITS2 & sequencing	NA	2005	NA	2009	Stat 2015 CoralReefs Geographic structure and host specificity	ITS2 primers: ITSD and ITS2rev2, cloning & sequencing of PCR products; verification of intragenomic variants & pseudogenes			ITSD and ITS2rev2
16690	Acropora humilis	ITS2	Cladocopium C27	C27		French Frigate Shoals	Eastern Indo-Pacific	Hawaii	Hawaii	10	20	23.7592	-164.807	Original pub	Original pub	Cloning of ITS2 & sequencing	NA	2005	NA	2009	Stat 2015 CoralReefs Geographic structure and host specificity	ITS2 primers: ITSD and ITS2rev2, cloning & sequencing of PCR products; verification of intragenomic variants & pseudogenes			ITSD and ITS2rev2
16691	Acropora humilis	ITS2	Cladocopium C27	C27		French Frigate Shoals	Eastern Indo-Pacific	Hawaii	Hawaii	10	20	23.7592	-164.807	Original pub	Original pub	Cloning of ITS2 & sequencing	NA	2005	NA	2009	Stat 2015 CoralReefs Geographic structure and host specificity	ITS2 primers: ITSD and ITS2rev2, cloning & sequencing of PCR products; verification of intragenomic variants & pseudogenes			ITSD and ITS2rev2
15928	Acropora humilis	ITS2	Cladocopium C3	C3		Tuléar	Western Indo-Pacific	Western Indian Ocean	Western and Northern Madagascar	1	30	-23.3	43.6	Original publication	Original publication	DGGE of ITS2 & sequencing	11	2009	11	2009	Boonstra 2011 Diss Latitudinal Patterns in the Distribution of Algal Symbionts	ITS2 primers: ITSintfor2 and ITS2Clamp, dominant bands of each characteristic profile were excised & sequenced. Variants co-occuring with main bands were identified.			ITSintfor2 and ITS2Clamp
16043	Acropora humilis	ITS2	Cladocopium C3	C3		Vohemar	Western Indo-Pacific	Western Indian Ocean	Western and Northern Madagascar	1	30	-13.4	50	Original publication	Original publication	DGGE of ITS2 & sequencing	9	2001	9	2001	Boonstra 2011 Diss Latitudinal Patterns in the Distribution of Algal Symbionts	ITS2 primers: ITSintfor2 and ITS2Clamp, dominant bands of each characteristic profile were excised & sequenced. Variants co-occuring with main bands were identified.			ITSintfor2 and ITS2Clamp
16044	Acropora humilis	ITS2	Cladocopium C3	C3		Vohemar	Western Indo-Pacific	Western Indian Ocean	Western and Northern Madagascar	1	30	-13.4	50	Original publication	Original publication	DGGE of ITS2 & sequencing	9	2001	9	2001	Boonstra 2011 Diss Latitudinal Patterns in the Distribution of Algal Symbionts	ITS2 primers: ITSintfor2 and ITS2Clamp, dominant bands of each characteristic profile were excised & sequenced. Variants co-occuring with main bands were identified.			ITSintfor2 and ITS2Clamp
3127	Acropora humilis	ITS2	Cladocopium C3	C3		Heron Island, GBR	Central Indo-Pacific	Northeast Australian Shelf	Central and Southern GBR	3	3	-23	152	Aquarist	Riddle 2011, Advanced Aquarist, Advanced Aquarist	DGGE of ITS2 & sequencing	2	2002	3	2002	LaJeunesse 2003 LimnolOceanogr Low symbiont diversity in southern Great Barrier Reef	ITS2 primers: ITSintfor2 and ITS2Clamp, representative dominant DGGE bands were excised & sequenced.			ITSintfor2 and ITS2Clamp
3128	Acropora humilis	ITS2	Cladocopium C3	C3		Heron Island, GBR	Central Indo-Pacific	Northeast Australian Shelf	Central and Southern GBR	3	3	-23	152	Aquarist	Riddle 2011, Advanced Aquarist, Advanced Aquarist	DGGE of ITS2 & sequencing	2	2002	3	2002	LaJeunesse 2003 LimnolOceanogr Low symbiont diversity in southern Great Barrier Reef	ITS2 primers: ITSintfor2 and ITS2Clamp, representative dominant DGGE bands were excised & sequenced.			ITSintfor2 and ITS2Clamp
16685	Acropora humilis	ITS2	Cladocopium C3	C3		French Frigate Shoals	Eastern Indo-Pacific	Hawaii	Hawaii	10	20	23.7592	-164.807	Original pub	Original pub	Cloning of ITS2 & sequencing	NA	2005	NA	2009	Stat 2015 CoralReefs Geographic structure and host specificity	ITS2 primers: ITSD and ITS2rev2, cloning & sequencing of PCR products; verification of intragenomic variants & pseudogenes			ITSD and ITS2rev2
16686	Acropora humilis	ITS2	Cladocopium C3	C3		French Frigate Shoals	Eastern Indo-Pacific	Hawaii	Hawaii	10	20	23.7592	-164.807	Original pub	Original pub	Cloning of ITS2 & sequencing	NA	2005	NA	2009	Stat 2015 CoralReefs Geographic structure and host specificity	ITS2 primers: ITSD and ITS2rev2, cloning & sequencing of PCR products; verification of intragenomic variants & pseudogenes			ITSD and ITS2rev2
16687	Acropora humilis	ITS2	Cladocopium C3	C3		French Frigate Shoals	Eastern Indo-Pacific	Hawaii	Hawaii	10	20	23.7592	-164.807	Original pub	Original pub	Cloning of ITS2 & sequencing	NA	2005	NA	2009	Stat 2015 CoralReefs Geographic structure and host specificity	ITS2 primers: ITSD and ITS2rev2, cloning & sequencing of PCR products; verification of intragenomic variants & pseudogenes			ITSD and ITS2rev2
16688	Acropora humilis	ITS2	Cladocopium C3	C3		French Frigate Shoals	Eastern Indo-Pacific	Hawaii	Hawaii	10	20	23.7592	-164.807	Original pub	Original pub	Cloning of ITS2 & sequencing	NA	2005	NA	2009	Stat 2015 CoralReefs Geographic structure and host specificity	ITS2 primers: ITSD and ITS2rev2, cloning & sequencing of PCR products; verification of intragenomic variants & pseudogenes			ITSD and ITS2rev2
18166	Acropora humilis	ITS2	Cladocopium C3	C3		Kenting National Park, Taiwan	Central Indo-Pacific	South Kuroshio	South Kuroshio	0	5	21.9317	120.746	Original Publication	Original Publication	DGGE of ITS2 & sequencing	10	2008	6	2009	Wang 2011 MEPS Photosystem II breakdown induced by reactiveoxygen species in freshly-isolated Symbiodiniumfrom Montipora(Scleractinia; Acroporidae)	ITS2 primers: ITSintfor2 and ITS2Clamp, dominant DGGE bands were excised and sequenced			ITSintfor2 and ITS2Clamp
18167	Acropora humilis	ITS2	Cladocopium C3	C3		Kenting National Park, Taiwan	Central Indo-Pacific	South Kuroshio	South Kuroshio	0	5	21.9317	120.746	Original Publication	Original Publication	DGGE of ITS2 & sequencing	10	2008	6	2009	Wang 2011 MEPS Photosystem II breakdown induced by reactiveoxygen species in freshly-isolated Symbiodiniumfrom Montipora(Scleractinia; Acroporidae)	ITS2 primers: ITSintfor2 and ITS2Clamp, dominant DGGE bands were excised and sequenced			ITSintfor2 and ITS2Clamp
18168	Acropora humilis	ITS2	Cladocopium C3	C3		Kenting National Park, Taiwan	Central Indo-Pacific	South Kuroshio	South Kuroshio	0	5	21.9317	120.746	Original Publication	Original Publication	DGGE of ITS2 & sequencing	10	2008	6	2009	Wang 2011 MEPS Photosystem II breakdown induced by reactiveoxygen species in freshly-isolated Symbiodiniumfrom Montipora(Scleractinia; Acroporidae)	ITS2 primers: ITSintfor2 and ITS2Clamp, dominant DGGE bands were excised and sequenced			ITSintfor2 and ITS2Clamp
18169	Acropora humilis	ITS2	Cladocopium C3	C3		Kenting National Park, Taiwan	Central Indo-Pacific	South Kuroshio	South Kuroshio	0	5	21.9317	120.746	Original Publication	Original Publication	DGGE of ITS2 & sequencing	10	2008	6	2009	Wang 2011 MEPS Photosystem II breakdown induced by reactiveoxygen species in freshly-isolated Symbiodiniumfrom Montipora(Scleractinia; Acroporidae)	ITS2 primers: ITSintfor2 and ITS2Clamp, dominant DGGE bands were excised and sequenced			ITSintfor2 and ITS2Clamp
18170	Acropora humilis	ITS2	Cladocopium C3	C3		Kenting National Park, Taiwan	Central Indo-Pacific	South Kuroshio	South Kuroshio	0	5	21.9317	120.746	Original Publication	Original Publication	DGGE of ITS2 & sequencing	10	2008	6	2009	Wang 2011 MEPS Photosystem II breakdown induced by reactiveoxygen species in freshly-isolated Symbiodiniumfrom Montipora(Scleractinia; Acroporidae)	ITS2 primers: ITSintfor2 and ITS2Clamp, dominant DGGE bands were excised and sequenced			ITSintfor2 and ITS2Clamp
18171	Acropora humilis	ITS2	Cladocopium C3	C3		Kenting National Park, Taiwan	Central Indo-Pacific	South Kuroshio	South Kuroshio	0	5	21.9317	120.746	Original Publication	Original Publication	DGGE of ITS2 & sequencing	10	2008	6	2009	Wang 2011 MEPS Photosystem II breakdown induced by reactiveoxygen species in freshly-isolated Symbiodiniumfrom Montipora(Scleractinia; Acroporidae)	ITS2 primers: ITSintfor2 and ITS2Clamp, dominant DGGE bands were excised and sequenced			ITSintfor2 and ITS2Clamp
18172	Acropora humilis	ITS2	Cladocopium C3	C3		Kenting National Park, Taiwan	Central Indo-Pacific	South Kuroshio	South Kuroshio	0	5	21.9317	120.746	Original Publication	Original Publication	DGGE of ITS2 & sequencing	10	2008	6	2009	Wang 2011 MEPS Photosystem II breakdown induced by reactiveoxygen species in freshly-isolated Symbiodiniumfrom Montipora(Scleractinia; Acroporidae)	ITS2 primers: ITSintfor2 and ITS2Clamp, dominant DGGE bands were excised and sequenced			ITSintfor2 and ITS2Clamp
18173	Acropora humilis	ITS2	Cladocopium C3	C3		Kenting National Park, Taiwan	Central Indo-Pacific	South Kuroshio	South Kuroshio	0	5	21.9317	120.746	Original Publication	Original Publication	DGGE of ITS2 & sequencing	10	2008	6	2009	Wang 2011 MEPS Photosystem II breakdown induced by reactiveoxygen species in freshly-isolated Symbiodiniumfrom Montipora(Scleractinia; Acroporidae)	ITS2 primers: ITSintfor2 and ITS2Clamp, dominant DGGE bands were excised and sequenced			ITSintfor2 and ITS2Clamp
18174	Acropora humilis	ITS2	Cladocopium C3	C3		Kenting National Park, Taiwan	Central Indo-Pacific	South Kuroshio	South Kuroshio	0	5	21.9317	120.746	Original Publication	Original Publication	DGGE of ITS2 & sequencing	10	2008	6	2009	Wang 2011 MEPS Photosystem II breakdown induced by reactiveoxygen species in freshly-isolated Symbiodiniumfrom Montipora(Scleractinia; Acroporidae)	ITS2 primers: ITSintfor2 and ITS2Clamp, dominant DGGE bands were excised and sequenced			ITSintfor2 and ITS2Clamp
15136	Acropora humilis	ITS2	Cladocopium C3	C3		Luhuitou Bay	Central Indo-Pacific	South China Sea	Gulf of Tonkin	1	10	18.2217	109.495	Original pub	Original pub	DGGE of ITS2 & sequencing	10	2008	10	2008	Zhou 2011 JSysEvol Low genetic diversity of symbiotic dinoflagellates	ITS2 primers: ITSintfor2 and ITS2Clamp, dominant DGGE bands were excised amplified and sequenced.			ITSintfor2 and ITS2Clamp
2967	Acropora humilis	ITS2	Cladocopium C3i	C3i		Feather Reef GBR	Central Indo-Pacific	Northeast Australian Shelf	Central and Southern Great Barrier Reef	1	8	-17.5083	146.377	Aquarist	Riddle 2011, Advanced Aquarist, Advanced Aquarist	DGGE of ITS2 & sequencing	5	2003	5	2003	LaJeunesse 2004 MEPS Closely related Symbiodinium spp differ in relative dominance	ITS2 primers: ITSintfor2 and ITS2Clamp, representative dominant DGGE bands were excised & sequenced.			ITSintfor2 and ITS2Clamp
9459	Acropora humilis	ITS2	Cladocopium C3i	C3i		Trunk Reef, GBR	Central Indo-Pacific	Northeast Australian Shelf	Central and Southern GBR	NA	NA	-18.3498	146.827	Original pub	Original pub	SSCP of ITS1	NA	1998	NA	1998	van Oppen 2001 ProcRSocB Patterns of coral–dinoflagellate associations in Acropora	ITS1 Primers: symITSFP and SymITSRP; SSCP analysis and sequencing			symITSFP and SymITSRP
9460	Acropora humilis	ITS2	Cladocopium C3i	C3i		Trunk Reef, GBR	Central Indo-Pacific	Northeast Australian Shelf	Central and Southern GBR	NA	NA	-18.3498	146.827	Original pub	Original pub	SSCP of ITS1	NA	1998	NA	1998	van Oppen 2001 ProcRSocB Patterns of coral–dinoflagellate associations in Acropora	ITS1 Primers: symITSFP and SymITSRP; SSCP analysis and sequencing			symITSFP and SymITSRP
2965	Acropora humilis	ITS2	Cladocopium C3k	C3k		Feather Reef GBR	Central Indo-Pacific	Northeast Australian Shelf	Central and Southern Great Barrier Reef	1	8	-17.5083	146.377	Aquarist	Riddle 2011, Advanced Aquarist, Advanced Aquarist	DGGE of ITS2 & sequencing	5	2003	5	2003	LaJeunesse 2004 MEPS Closely related Symbiodinium spp differ in relative dominance	ITS2 primers: ITSintfor2 and ITS2Clamp, representative dominant DGGE bands were excised & sequenced.			ITSintfor2 and ITS2Clamp
2966	Acropora humilis	ITS2	Cladocopium C3k	C3k		Feather Reef GBR	Central Indo-Pacific	Northeast Australian Shelf	Central and Southern Great Barrier Reef	1	8	-17.5083	146.377	Aquarist	Riddle 2011, Advanced Aquarist, Advanced Aquarist	DGGE of ITS2 & sequencing	5	2003	5	2003	LaJeunesse 2004 MEPS Closely related Symbiodinium spp differ in relative dominance	ITS2 primers: ITSintfor2 and ITS2Clamp, representative dominant DGGE bands were excised & sequenced.			ITSintfor2 and ITS2Clamp
2446	Acropora humilis	ITS2	Cladocopium C3u	C3u		Cape Panwa	Western Indo-Pacific	Andaman	Andaman Sea Coral Coast	0	5	7.8073	98.4092	Geosymbio	Geosymbio	DGGE of ITS2 & sequencing	2	2007	2	2007	LaJeunesse 2010 JBiogeograph Long-standing environmental conditions isolation and host–symbiont specificity	ITS2 primers: ITSintfor2 and ITS2Clamp, representative dominant DGGE bands were excised & sequenced.			ITSintfor2 and ITS2Clamp
2447	Acropora humilis	ITS2	Cladocopium C3u	C3u		Cape Panwa	Western Indo-Pacific	Andaman	Andaman Sea Coral Coast	0	5	7.8073	98.4092	Geosymbio	Geosymbio	DGGE of ITS2 & sequencing	2	2007	2	2007	LaJeunesse 2010 JBiogeograph Long-standing environmental conditions isolation and host–symbiont specificity	ITS2 primers: ITSintfor2 and ITS2Clamp, representative dominant DGGE bands were excised & sequenced.			ITSintfor2 and ITS2Clamp
2448	Acropora humilis	ITS2	Cladocopium C3u	C3u		Cape Panwa	Western Indo-Pacific	Andaman	Andaman Sea Coral Coast	0	5	7.8073	98.4092	Geosymbio	Geosymbio	DGGE of ITS2 & sequencing	2	2007	2	2007	LaJeunesse 2010 JBiogeograph Long-standing environmental conditions isolation and host–symbiont specificity	ITS2 primers: ITSintfor2 and ITS2Clamp, representative dominant DGGE bands were excised & sequenced.			ITSintfor2 and ITS2Clamp
15496	Acropora humilis	ITS2	Cladocopium C3z	C3z		Nosy Bé	Western Indo-Pacific	Western Indian Ocean	Western and Northern Madagascar	1	30	-13.4	48	Original publication	Original publication	DGGE of ITS2 & sequencing	9	2001	9	2001	Boonstra 2011 Diss Latitudinal Patterns in the Distribution of Algal Symbionts	ITS2 primers: ITSintfor2 and ITS2Clamp, dominant bands of each characteristic profile were excised & sequenced. Variants co-occuring with main bands were identified.			ITSintfor2 and ITS2Clamp
15568	Acropora humilis	ITS2	Cladocopium C3z	C3z		Nosy Bé	Western Indo-Pacific	Western Indian Ocean	Western and Northern Madagascar	1	30	-13.4	48	Original publication	Original publication	DGGE of ITS2 & sequencing	3	2007	3	2007	Boonstra 2011 Diss Latitudinal Patterns in the Distribution of Algal Symbionts	ITS2 primers: ITSintfor2 and ITS2Clamp, dominant bands of each characteristic profile were excised & sequenced. Variants co-occuring with main bands were identified.			ITSintfor2 and ITS2Clamp
15569	Acropora humilis	ITS2	Cladocopium C3z	C3z		Nosy Bé	Western Indo-Pacific	Western Indian Ocean	Western and Northern Madagascar	1	30	-13.4	48	Original publication	Original publication	DGGE of ITS2 & sequencing	3	2007	3	2007	Boonstra 2011 Diss Latitudinal Patterns in the Distribution of Algal Symbionts	ITS2 primers: ITSintfor2 and ITS2Clamp, dominant bands of each characteristic profile were excised & sequenced. Variants co-occuring with main bands were identified.			ITSintfor2 and ITS2Clamp
15570	Acropora humilis	ITS2	Cladocopium C3z	C3z		Nosy Bé	Western Indo-Pacific	Western Indian Ocean	Western and Northern Madagascar	1	30	-13.4	48	Original publication	Original publication	DGGE of ITS2 & sequencing	3	2007	3	2007	Boonstra 2011 Diss Latitudinal Patterns in the Distribution of Algal Symbionts	ITS2 primers: ITSintfor2 and ITS2Clamp, dominant bands of each characteristic profile were excised & sequenced. Variants co-occuring with main bands were identified.			ITSintfor2 and ITS2Clamp
15571	Acropora humilis	ITS2	Cladocopium C3z	C3z		Nosy Bé	Western Indo-Pacific	Western Indian Ocean	Western and Northern Madagascar	1	30	-13.4	48	Original publication	Original publication	DGGE of ITS2 & sequencing	3	2007	3	2007	Boonstra 2011 Diss Latitudinal Patterns in the Distribution of Algal Symbionts	ITS2 primers: ITSintfor2 and ITS2Clamp, dominant bands of each characteristic profile were excised & sequenced. Variants co-occuring with main bands were identified.			ITSintfor2 and ITS2Clamp
15572	Acropora humilis	ITS2	Cladocopium C3z	C3z		Nosy Bé	Western Indo-Pacific	Western Indian Ocean	Western and Northern Madagascar	1	30	-13.4	48	Original publication	Original publication	DGGE of ITS2 & sequencing	3	2007	3	2007	Boonstra 2011 Diss Latitudinal Patterns in the Distribution of Algal Symbionts	ITS2 primers: ITSintfor2 and ITS2Clamp, dominant bands of each characteristic profile were excised & sequenced. Variants co-occuring with main bands were identified.			ITSintfor2 and ITS2Clamp
15573	Acropora humilis	ITS2	Cladocopium C3z	C3z		Nosy Bé	Western Indo-Pacific	Western Indian Ocean	Western and Northern Madagascar	1	30	-13.4	48	Original publication	Original publication	DGGE of ITS2 & sequencing	3	2007	3	2007	Boonstra 2011 Diss Latitudinal Patterns in the Distribution of Algal Symbionts	ITS2 primers: ITSintfor2 and ITS2Clamp, dominant bands of each characteristic profile were excised & sequenced. Variants co-occuring with main bands were identified.			ITSintfor2 and ITS2Clamp
15574	Acropora humilis	ITS2	Cladocopium C3z	C3z		Nosy Bé	Western Indo-Pacific	Western Indian Ocean	Western and Northern Madagascar	1	30	-13.4	48	Original publication	Original publication	DGGE of ITS2 & sequencing	3	2007	3	2007	Boonstra 2011 Diss Latitudinal Patterns in the Distribution of Algal Symbionts	ITS2 primers: ITSintfor2 and ITS2Clamp, dominant bands of each characteristic profile were excised & sequenced. Variants co-occuring with main bands were identified.			ITSintfor2 and ITS2Clamp
15575	Acropora humilis	ITS2	Cladocopium C3z	C3z		Nosy Bé	Western Indo-Pacific	Western Indian Ocean	Western and Northern Madagascar	1	30	-13.4	48	Original publication	Original publication	DGGE of ITS2 & sequencing	3	2007	3	2007	Boonstra 2011 Diss Latitudinal Patterns in the Distribution of Algal Symbionts	ITS2 primers: ITSintfor2 and ITS2Clamp, dominant bands of each characteristic profile were excised & sequenced. Variants co-occuring with main bands were identified.			ITSintfor2 and ITS2Clamp
15576	Acropora humilis	ITS2	Cladocopium C3z	C3z		Nosy Bé	Western Indo-Pacific	Western Indian Ocean	Western and Northern Madagascar	1	30	-13.4	48	Original publication	Original publication	DGGE of ITS2 & sequencing	3	2007	3	2007	Boonstra 2011 Diss Latitudinal Patterns in the Distribution of Algal Symbionts	ITS2 primers: ITSintfor2 and ITS2Clamp, dominant bands of each characteristic profile were excised & sequenced. Variants co-occuring with main bands were identified.			ITSintfor2 and ITS2Clamp
15577	Acropora humilis	ITS2	Cladocopium C3z	C3z		Nosy Bé	Western Indo-Pacific	Western Indian Ocean	Western and Northern Madagascar	1	30	-13.4	48	Original publication	Original publication	DGGE of ITS2 & sequencing	3	2007	3	2007	Boonstra 2011 Diss Latitudinal Patterns in the Distribution of Algal Symbionts	ITS2 primers: ITSintfor2 and ITS2Clamp, dominant bands of each characteristic profile were excised & sequenced. Variants co-occuring with main bands were identified.			ITSintfor2 and ITS2Clamp
15578	Acropora humilis	ITS2	Cladocopium C3z	C3z		Nosy Bé	Western Indo-Pacific	Western Indian Ocean	Western and Northern Madagascar	1	30	-13.4	48	Original publication	Original publication	DGGE of ITS2 & sequencing	3	2007	3	2007	Boonstra 2011 Diss Latitudinal Patterns in the Distribution of Algal Symbionts	ITS2 primers: ITSintfor2 and ITS2Clamp, dominant bands of each characteristic profile were excised & sequenced. Variants co-occuring with main bands were identified.			ITSintfor2 and ITS2Clamp
15579	Acropora humilis	ITS2	Cladocopium C3z	C3z		Nosy Bé	Western Indo-Pacific	Western Indian Ocean	Western and Northern Madagascar	1	30	-13.4	48	Original publication	Original publication	DGGE of ITS2 & sequencing	3	2007	3	2007	Boonstra 2011 Diss Latitudinal Patterns in the Distribution of Algal Symbionts	ITS2 primers: ITSintfor2 and ITS2Clamp, dominant bands of each characteristic profile were excised & sequenced. Variants co-occuring with main bands were identified.			ITSintfor2 and ITS2Clamp
15580	Acropora humilis	ITS2	Cladocopium C3z	C3z		Nosy Bé	Western Indo-Pacific	Western Indian Ocean	Western and Northern Madagascar	1	30	-13.4	48	Original publication	Original publication	DGGE of ITS2 & sequencing	3	2007	3	2007	Boonstra 2011 Diss Latitudinal Patterns in the Distribution of Algal Symbionts	ITS2 primers: ITSintfor2 and ITS2Clamp, dominant bands of each characteristic profile were excised & sequenced. Variants co-occuring with main bands were identified.			ITSintfor2 and ITS2Clamp
15581	Acropora humilis	ITS2	Cladocopium C3z	C3z		Nosy Bé	Western Indo-Pacific	Western Indian Ocean	Western and Northern Madagascar	1	30	-13.4	48	Original publication	Original publication	DGGE of ITS2 & sequencing	3	2007	3	2007	Boonstra 2011 Diss Latitudinal Patterns in the Distribution of Algal Symbionts	ITS2 primers: ITSintfor2 and ITS2Clamp, dominant bands of each characteristic profile were excised & sequenced. Variants co-occuring with main bands were identified.			ITSintfor2 and ITS2Clamp
15582	Acropora humilis	ITS2	Cladocopium C3z	C3z		Nosy Bé	Western Indo-Pacific	Western Indian Ocean	Western and Northern Madagascar	1	30	-13.4	48	Original publication	Original publication	DGGE of ITS2 & sequencing	3	2007	3	2007	Boonstra 2011 Diss Latitudinal Patterns in the Distribution of Algal Symbionts	ITS2 primers: ITSintfor2 and ITS2Clamp, dominant bands of each characteristic profile were excised & sequenced. Variants co-occuring with main bands were identified.			ITSintfor2 and ITS2Clamp
15583	Acropora humilis	ITS2	Cladocopium C3z	C3z		Nosy Bé	Western Indo-Pacific	Western Indian Ocean	Western and Northern Madagascar	1	30	-13.4	48	Original publication	Original publication	DGGE of ITS2 & sequencing	3	2007	3	2007	Boonstra 2011 Diss Latitudinal Patterns in the Distribution of Algal Symbionts	ITS2 primers: ITSintfor2 and ITS2Clamp, dominant bands of each characteristic profile were excised & sequenced. Variants co-occuring with main bands were identified.			ITSintfor2 and ITS2Clamp
15584	Acropora humilis	ITS2	Cladocopium C3z	C3z		Nosy Bé	Western Indo-Pacific	Western Indian Ocean	Western and Northern Madagascar	1	30	-13.4	48	Original publication	Original publication	DGGE of ITS2 & sequencing	3	2007	3	2007	Boonstra 2011 Diss Latitudinal Patterns in the Distribution of Algal Symbionts	ITS2 primers: ITSintfor2 and ITS2Clamp, dominant bands of each characteristic profile were excised & sequenced. Variants co-occuring with main bands were identified.			ITSintfor2 and ITS2Clamp
15585	Acropora humilis	ITS2	Cladocopium C3z	C3z		Nosy Bé	Western Indo-Pacific	Western Indian Ocean	Western and Northern Madagascar	1	30	-13.4	48	Original publication	Original publication	DGGE of ITS2 & sequencing	3	2007	3	2007	Boonstra 2011 Diss Latitudinal Patterns in the Distribution of Algal Symbionts	ITS2 primers: ITSintfor2 and ITS2Clamp, dominant bands of each characteristic profile were excised & sequenced. Variants co-occuring with main bands were identified.			ITSintfor2 and ITS2Clamp
15586	Acropora humilis	ITS2	Cladocopium C3z	C3z		Nosy Bé	Western Indo-Pacific	Western Indian Ocean	Western and Northern Madagascar	1	30	-13.4	48	Original publication	Original publication	DGGE of ITS2 & sequencing	3	2007	3	2007	Boonstra 2011 Diss Latitudinal Patterns in the Distribution of Algal Symbionts	ITS2 primers: ITSintfor2 and ITS2Clamp, dominant bands of each characteristic profile were excised & sequenced. Variants co-occuring with main bands were identified.			ITSintfor2 and ITS2Clamp
15587	Acropora humilis	ITS2	Cladocopium C3z	C3z		Nosy Bé	Western Indo-Pacific	Western Indian Ocean	Western and Northern Madagascar	1	30	-13.4	48	Original publication	Original publication	DGGE of ITS2 & sequencing	3	2007	3	2007	Boonstra 2011 Diss Latitudinal Patterns in the Distribution of Algal Symbionts	ITS2 primers: ITSintfor2 and ITS2Clamp, dominant bands of each characteristic profile were excised & sequenced. Variants co-occuring with main bands were identified.			ITSintfor2 and ITS2Clamp
15588	Acropora humilis	ITS2	Cladocopium C3z	C3z		Nosy Bé	Western Indo-Pacific	Western Indian Ocean	Western and Northern Madagascar	1	30	-13.4	48	Original publication	Original publication	DGGE of ITS2 & sequencing	3	2007	3	2007	Boonstra 2011 Diss Latitudinal Patterns in the Distribution of Algal Symbionts	ITS2 primers: ITSintfor2 and ITS2Clamp, dominant bands of each characteristic profile were excised & sequenced. Variants co-occuring with main bands were identified.			ITSintfor2 and ITS2Clamp
15589	Acropora humilis	ITS2	Cladocopium C3z	C3z		Nosy Bé	Western Indo-Pacific	Western Indian Ocean	Western and Northern Madagascar	1	30	-13.4	48	Original publication	Original publication	DGGE of ITS2 & sequencing	3	2007	3	2007	Boonstra 2011 Diss Latitudinal Patterns in the Distribution of Algal Symbionts	ITS2 primers: ITSintfor2 and ITS2Clamp, dominant bands of each characteristic profile were excised & sequenced. Variants co-occuring with main bands were identified.			ITSintfor2 and ITS2Clamp
2449	Acropora humilis	ITS2	Cladocopium C3z	C3z		Similan Islands	Western Indo-Pacific	Andaman	Andaman Sea Coral Coast	2	12	8.6525	97.6408	Geosymbio	Geosymbio	DGGE of ITS2 & sequencing	2	2007	2	2007	LaJeunesse 2010 JBiogeograph Long-standing environmental conditions isolation and host–symbiont specificity	ITS2 primers: ITSintfor2 and ITS2Clamp, representative dominant DGGE bands were excised & sequenced.			ITSintfor2 and ITS2Clamp
15475	Acropora humilis	ITS2	Cladocopium C94a	C94a		NA	NA	NA	NA	NA	NA	NA	NA	Original pub	Original pub	DGGE of ITS2 & sequencing	NA	NA	NA	NA	Smith 2009 JPhycol symbiodinium (dinophyta) diversity and stability in aquarium	ITS2 primers: ITSintfor2 and ITS2Clamp, dominant DGGE bands were excised and sequenced			ITSintfor2 and ITS2Clamp
16045	Acropora humilis	ITS2	Durusdinium D1-4	D1-4		Vohemar	Western Indo-Pacific	Western Indian Ocean	Western and Northern Madagascar	1	30	-13.4	50	Original publication	Original publication	DGGE of ITS2 & sequencing	9	2001	9	2001	Boonstra 2011 Diss Latitudinal Patterns in the Distribution of Algal Symbionts	ITS2 primers: ITSintfor2 and ITS2Clamp, dominant bands of each characteristic profile were excised & sequenced. Variants co-occuring with main bands were identified.			ITSintfor2 and ITS2Clamp
17259	Acropora hyacinthus	ITS2	Symbiodinium A1	A1		Moorea	Eastern Indo-Pacific	Central Polynesia	Society Islands	1	1	-17.4772	-149.802	Original Pub	Original Pub	Cloning of ITS2 & sequencing	NA	NA	NA	NA	Putnam 2012 ProcRSocB Endosymbiotic flexibility associates with environ sensitivity	ITS2 primers: ITS-DINO and ITS2rev2, cloning and sequencing of PCR products			S-DINO and ITS2Rev2
17260	Acropora hyacinthus	ITS2	Symbiodinium A1.4	A1.4		Moorea	Eastern Indo-Pacific	Central Polynesia	Society Islands	1	1	-17.4772	-149.802	Original Pub	Original Pub	Cloning of ITS2 & sequencing	NA	NA	NA	NA	Putnam 2012 ProcRSocB Endosymbiotic flexibility associates with environ sensitivity	ITS2 primers: ITS-DINO and ITS2rev2, cloning and sequencing of PCR products			S-DINO and ITS2Rev2
17261	Acropora hyacinthus	ITS2	Symbiodinium A3	A3		Moorea	Eastern Indo-Pacific	Central Polynesia	Society Islands	1	1	-17.4772	-149.802	Original Pub	Original Pub	Cloning of ITS2 & sequencing	NA	NA	NA	NA	Putnam 2012 ProcRSocB Endosymbiotic flexibility associates with environ sensitivity	ITS2 primers: ITS-DINO and ITS2rev2, cloning and sequencing of PCR products			S-DINO and ITS2Rev2
17263	Acropora hyacinthus	ITS2	Cladocopium C1	C1		Moorea	Eastern Indo-Pacific	Central Polynesia	Society Islands	1	1	-17.4772	-149.802	Original Pub	Original Pub	Cloning of ITS2 & sequencing	NA	NA	NA	NA	Putnam 2012 ProcRSocB Endosymbiotic flexibility associates with environ sensitivity	ITS2 primers: ITS-DINO and ITS2rev2, cloning and sequencing of PCR products			S-DINO and ITS2Rev2
9461	Acropora hyacinthus	ITS2	Cladocopium C1	C1		Geoffrey Bay, Magnetic Island, GBR	Central Indo-Pacific	Northeast Australian Shelf	Central and Southern GBR	NA	NA	-19.1517	146.866	Original pub	Original pub	SSCP of ITS1	NA	2000	NA	2000	van Oppen 2001 ProcRSocB Patterns of coral–dinoflagellate associations in Acropora	ITS1 Primers: symITSFP and SymITSRP; SSCP analysis and sequencing			symITSFP and SymITSRP
9462	Acropora hyacinthus	ITS2	Cladocopium C1	C1		Geoffrey Bay, Magnetic Island, GBR	Central Indo-Pacific	Northeast Australian Shelf	Central and Southern GBR	NA	NA	-19.1517	146.866	Original pub	Original pub	SSCP of ITS1	NA	2000	NA	2000	van Oppen 2001 ProcRSocB Patterns of coral–dinoflagellate associations in Acropora	ITS1 Primers: symITSFP and SymITSRP; SSCP analysis and sequencing			symITSFP and SymITSRP
2450	Acropora hyacinthus	ITS2	Cladocopium C101	C101		Cape Panwa	Western Indo-Pacific	Andaman	Andaman Sea Coral Coast	0	5	7.8073	98.4092	Geosymbio	Geosymbio	DGGE of ITS2 & sequencing	2	2007	2	2007	LaJeunesse 2010 JBiogeograph Long-standing environmental conditions isolation and host–symbiont specificity	ITS2 primers: ITSintfor2 and ITS2Clamp, representative dominant DGGE bands were excised & sequenced.			ITSintfor2 and ITS2Clamp
2451	Acropora hyacinthus	ITS2	Cladocopium C101a	C101a		Racha	Western Indo-Pacific	Andaman	Andaman Sea Coral Coast	2	5	7.6101	98.3706	Geosymbio	Geosymbio	DGGE of ITS2 & sequencing	2	2007	2	2007	LaJeunesse 2010 JBiogeograph Long-standing environmental conditions isolation and host–symbiont specificity	ITS2 primers: ITSintfor2 and ITS2Clamp, representative dominant DGGE bands were excised & sequenced.			ITSintfor2 and ITS2Clamp
17257	Acropora hyacinthus	ITS2	Cladocopium C21	C21		Moorea	Eastern Indo-Pacific	Central Polynesia	Society Islands	7	7	-17.5475	-149.769	Original Pub	Original Pub	Cloning of ITS2 & sequencing	NA	NA	NA	NA	Putnam 2012 ProcRSocB Endosymbiotic flexibility associates with environ sensitivity	ITS2 primers: ITS-DINO and ITS2rev2, cloning and sequencing of PCR products			S-DINO and ITS2Rev2
17252	Acropora hyacinthus	ITS2	Cladocopium C21.12	C21.12		Moorea	Eastern Indo-Pacific	Central Polynesia	Society Islands	7	7	-17.5146	-149.762	Original Pub	Original Pub	Cloning of ITS2 & sequencing	NA	NA	NA	NA	Putnam 2012 ProcRSocB Endosymbiotic flexibility associates with environ sensitivity	ITS2 primers: ITS-DINO and ITS2rev2, cloning and sequencing of PCR products			S-DINO and ITS2Rev2
17258	Acropora hyacinthus	ITS2	Cladocopium C21.12	C21.12		Moorea	Eastern Indo-Pacific	Central Polynesia	Society Islands	7	7	-17.5146	-149.762	Original Pub	Original Pub	Cloning of ITS2 & sequencing	NA	NA	NA	NA	Putnam 2012 ProcRSocB Endosymbiotic flexibility associates with environ sensitivity	ITS2 primers: ITS-DINO and ITS2rev2, cloning and sequencing of PCR products			S-DINO and ITS2Rev2
17262	Acropora hyacinthus	ITS2	Cladocopium C21.20	C21.20		Moorea	Eastern Indo-Pacific	Central Polynesia	Society Islands	1	1	-17.4772	-149.802	Original Pub	Original Pub	Cloning of ITS2 & sequencing	NA	NA	NA	NA	Putnam 2012 ProcRSocB Endosymbiotic flexibility associates with environ sensitivity	ITS2 primers: ITS-DINO and ITS2rev2, cloning and sequencing of PCR products			S-DINO and ITS2Rev2
9832	Acropora hyacinthus	ITS2	Cladocopium C3	C3		Orpheus Island, GBR	Central Indo-Pacific	Northeast Australian Shelf	Central and Southern GBR	NA	NA	-18.6061	146.491	Original pub	Original pub	SSCP of ITS1	NA	2003	NA	2006	Abrego 2009 MolEcol Highly infectious symbiont dominates	ITS1 Primers: symITSFP and SymITSRP; SSCP sensitivity ~10%; single SSCP band for most samples; few samples w >1 band were reported as mixed Symbio types		symITSFP and SymITSRP
9833	Acropora hyacinthus	ITS2	Cladocopium C3	C3		Orpheus Island, GBR	Central Indo-Pacific	Northeast Australian Shelf	Central and Southern GBR	NA	NA	-18.6061	146.491	Original pub	Original pub	SSCP of ITS1	NA	2003	NA	2006	Abrego 2009 MolEcol Highly infectious symbiont dominates	ITS1 Primers: symITSFP and SymITSRP; SSCP sensitivity ~10%; single SSCP band for most samples; few samples w >1 band were reported as mixed Symbio types		symITSFP and SymITSRP
3129	Acropora hyacinthus	ITS2	Cladocopium C3	C3		Heron Island, GBR	Central Indo-Pacific	Northeast Australian Shelf	Central and Southern GBR	3	3	-23	152	Aquarist	Riddle 2011, Advanced Aquarist, Advanced Aquarist	DGGE of ITS2 & sequencing	2	2002	3	2002	LaJeunesse 2003 LimnolOceanogr Low symbiont diversity in southern Great Barrier Reef	ITS2 primers: ITSintfor2 and ITS2Clamp, representative dominant DGGE bands were excised & sequenced.			ITSintfor2 and ITS2Clamp
2969	Acropora hyacinthus	ITS2	Cladocopium C3	C3		Curaçao Island	Central Indo-Pacific	Northeast Australian Shelf	Central and Southern Great Barrier Reef	1	6	-18.67	146.549	Aquarist	Riddle 2011, Advanced Aquarist, Advanced Aquarist	DGGE of ITS2 & sequencing	5	2003	5	2003	LaJeunesse 2004 MEPS Closely related Symbiodinium spp differ in relative dominance	ITS2 primers: ITSintfor2 and ITS2Clamp, representative dominant DGGE bands were excised & sequenced.			ITSintfor2 and ITS2Clamp
3335	Acropora hyacinthus	ITS2	Cladocopium C3	C3		Ofu Island, American Samoa	Eastern Indo-Pacific	Central Polynesia	Samoa Islands	1	3	-14.177	-169.652	Aquarist	Riddle 2011, Advanced Aquarist, Advanced Aquarist	Direct sequencing of ITS1	3	2007	3	2007	Oliver 2011 CoralReefs Many corals host thermally resistant symbionts in high-temperature habit	ITS1 primers: S-DINO and D1R-rev, direct sequencing of PCR products		S-DINO and D1R-rev
3336	Acropora hyacinthus	ITS2	Cladocopium C3	C3		Ofu Island, American Samoa	Eastern Indo-Pacific	Central Polynesia	Samoa Islands	1	3	-14.177	-169.652	Aquarist	Riddle 2011, Advanced Aquarist, Advanced Aquarist	Direct sequencing of ITS1	3	2007	3	2007	Oliver 2011 CoralReefs Many corals host thermally resistant symbionts in high-temperature habit	ITS1 primers: S-DINO and D1R-rev, direct sequencing of PCR products		S-DINO and D1R-rev
3337	Acropora hyacinthus	ITS2	Cladocopium C3	C3		Ofu Island, American Samoa	Eastern Indo-Pacific	Central Polynesia	Samoa Islands	1	3	-14.177	-169.652	Aquarist	Riddle 2011, Advanced Aquarist, Advanced Aquarist	Direct sequencing of ITS1	3	2007	3	2007	Oliver 2011 CoralReefs Many corals host thermally resistant symbionts in high-temperature habit	ITS1 primers: S-DINO and D1R-rev, direct sequencing of PCR products		S-DINO and D1R-rev
3338	Acropora hyacinthus	ITS2	Cladocopium C3	C3		Ofu Island, American Samoa	Eastern Indo-Pacific	Central Polynesia	Samoa Islands	1	3	-14.177	-169.652	Aquarist	Riddle 2011, Advanced Aquarist, Advanced Aquarist	Direct sequencing of ITS1	3	2007	3	2007	Oliver 2011 CoralReefs Many corals host thermally resistant symbionts in high-temperature habit	ITS1 primers: S-DINO and D1R-rev, direct sequencing of PCR products		S-DINO and D1R-rev
3339	Acropora hyacinthus	ITS2	Cladocopium C3	C3		Ofu Island, American Samoa	Eastern Indo-Pacific	Central Polynesia	Samoa Islands	1	3	-14.177	-169.652	Aquarist	Riddle 2011, Advanced Aquarist, Advanced Aquarist	Direct sequencing of ITS1	3	2007	3	2007	Oliver 2011 CoralReefs Many corals host thermally resistant symbionts in high-temperature habit	ITS1 primers: S-DINO and D1R-rev, direct sequencing of PCR products		S-DINO and D1R-rev
3340	Acropora hyacinthus	ITS2	Cladocopium C3	C3		Ofu Island, American Samoa	Eastern Indo-Pacific	Central Polynesia	Samoa Islands	1	3	-14.177	-169.652	Aquarist	Riddle 2011, Advanced Aquarist, Advanced Aquarist	Direct sequencing of ITS1	3	2007	3	2007	Oliver 2011 CoralReefs Many corals host thermally resistant symbionts in high-temperature habit	ITS1 primers: S-DINO and D1R-rev, direct sequencing of PCR products		S-DINO and D1R-rev
3341	Acropora hyacinthus	ITS2	Cladocopium C3	C3		Ofu Island, American Samoa	Eastern Indo-Pacific	Central Polynesia	Samoa Islands	1	3	-14.177	-169.652	Aquarist	Riddle 2011, Advanced Aquarist, Advanced Aquarist	Direct sequencing of ITS1	3	2007	3	2007	Oliver 2011 CoralReefs Many corals host thermally resistant symbionts in high-temperature habit	ITS1 primers: S-DINO and D1R-rev, direct sequencing of PCR products		S-DINO and D1R-rev
3342	Acropora hyacinthus	ITS2	Cladocopium C3	C3		Ofu Island, American Samoa	Eastern Indo-Pacific	Central Polynesia	Samoa Islands	1	3	-14.177	-169.652	Aquarist	Riddle 2011, Advanced Aquarist, Advanced Aquarist	Direct sequencing of ITS1	3	2007	3	2007	Oliver 2011 CoralReefs Many corals host thermally resistant symbionts in high-temperature habit	ITS1 primers: S-DINO and D1R-rev, direct sequencing of PCR products		S-DINO and D1R-rev
3343	Acropora hyacinthus	ITS2	Cladocopium C3	C3		Ofu Island, American Samoa	Eastern Indo-Pacific	Central Polynesia	Samoa Islands	1	3	-14.177	-169.652	Aquarist	Riddle 2011, Advanced Aquarist, Advanced Aquarist	Direct sequencing of ITS1	3	2007	3	2007	Oliver 2011 CoralReefs Many corals host thermally resistant symbionts in high-temperature habit	ITS1 primers: S-DINO and D1R-rev, direct sequencing of PCR products		S-DINO and D1R-rev
17248	Acropora hyacinthus	ITS2	Cladocopium C3	C3		Moorea	Eastern Indo-Pacific	Central Polynesia	Society Islands	7	7	-17.5146	-149.762	Original Pub	Original Pub	Cloning of ITS2 & sequencing	NA	NA	NA	NA	Putnam 2012 ProcRSocB Endosymbiotic flexibility associates with environ sensitivity	ITS2 primers: ITS-DINO and ITS2rev2, cloning and sequencing of PCR products			S-DINO and ITS2Rev2
17253	Acropora hyacinthus	ITS2	Cladocopium C3	C3		Moorea	Eastern Indo-Pacific	Central Polynesia	Society Islands	7	7	-17.5475	-149.769	Original Pub	Original Pub	Cloning of ITS2 & sequencing	NA	NA	NA	NA	Putnam 2012 ProcRSocB Endosymbiotic flexibility associates with environ sensitivity	ITS2 primers: ITS-DINO and ITS2rev2, cloning and sequencing of PCR products			S-DINO and ITS2Rev2
15123	Acropora hyacinthus	ITS2	Cladocopium C3	C3		Luhuitou Bay	Central Indo-Pacific	South China Sea	Gulf of Tonkin	1	10	18.2217	109.495	Original pub	Original pub	DGGE of ITS2 & sequencing	10	2008	10	2008	Zhou 2011 JSysEvol Low genetic diversity of symbiotic dinoflagellates	ITS2 primers: ITSintfor2 and ITS2Clamp, dominant DGGE bands were excised amplified and sequenced.			ITSintfor2 and ITS2Clamp
17249	Acropora hyacinthus	ITS2	Cladocopium C3.18	C3.18		Moorea	Eastern Indo-Pacific	Central Polynesia	Society Islands	7	7	-17.5146	-149.762	Original Pub	Original Pub	Cloning of ITS2 & sequencing	NA	NA	NA	NA	Putnam 2012 ProcRSocB Endosymbiotic flexibility associates with environ sensitivity	ITS2 primers: ITS-DINO and ITS2rev2, cloning and sequencing of PCR products			S-DINO and ITS2Rev2
17254	Acropora hyacinthus	ITS2	Cladocopium C3.18	C3.18		Moorea	Eastern Indo-Pacific	Central Polynesia	Society Islands	7	7	-17.5475	-149.769	Original Pub	Original Pub	Cloning of ITS2 & sequencing	NA	NA	NA	NA	Putnam 2012 ProcRSocB Endosymbiotic flexibility associates with environ sensitivity	ITS2 primers: ITS-DINO and ITS2rev2, cloning and sequencing of PCR products			S-DINO and ITS2Rev2
17250	Acropora hyacinthus	ITS2	Cladocopium C3.23	C3.23		Moorea	Eastern Indo-Pacific	Central Polynesia	Society Islands	7	7	-17.5146	-149.762	Original Pub	Original Pub	Cloning of ITS2 & sequencing	NA	NA	NA	NA	Putnam 2012 ProcRSocB Endosymbiotic flexibility associates with environ sensitivity	ITS2 primers: ITS-DINO and ITS2rev2, cloning and sequencing of PCR products			S-DINO and ITS2Rev2
17255	Acropora hyacinthus	ITS2	Cladocopium C3.23	C3.23		Moorea	Eastern Indo-Pacific	Central Polynesia	Society Islands	7	7	-17.5475	-149.769	Original Pub	Original Pub	Cloning of ITS2 & sequencing	NA	NA	NA	NA	Putnam 2012 ProcRSocB Endosymbiotic flexibility associates with environ sensitivity	ITS2 primers: ITS-DINO and ITS2rev2, cloning and sequencing of PCR products			S-DINO and ITS2Rev2
17251	Acropora hyacinthus	ITS2	Cladocopium C3.24	C3.24		Moorea	Eastern Indo-Pacific	Central Polynesia	Society Islands	7	7	-17.5146	-149.762	Original Pub	Original Pub	Cloning of ITS2 & sequencing	NA	NA	NA	NA	Putnam 2012 ProcRSocB Endosymbiotic flexibility associates with environ sensitivity	ITS2 primers: ITS-DINO and ITS2rev2, cloning and sequencing of PCR products			S-DINO and ITS2Rev2
17256	Acropora hyacinthus	ITS2	Cladocopium C3.24	C3.24		Moorea	Eastern Indo-Pacific	Central Polynesia	Society Islands	7	7	-17.5475	-149.769	Original Pub	Original Pub	Cloning of ITS2 & sequencing	NA	NA	NA	NA	Putnam 2012 ProcRSocB Endosymbiotic flexibility associates with environ sensitivity	ITS2 primers: ITS-DINO and ITS2rev2, cloning and sequencing of PCR products			S-DINO and ITS2Rev2
2968	Acropora hyacinthus	ITS2	Cladocopium C3k	C3k		Feather Reef GBR	Central Indo-Pacific	Northeast Australian Shelf	Central and Southern Great Barrier Reef	1	8	-17.5083	146.377	SymbioGBR	SymbioGBR	DGGE of ITS2 & sequencing	5	2003	5	2003	LaJeunesse 2004 MEPS Closely related Symbiodinium spp differ in relative dominance	ITS2 primers: ITSintfor2 and ITS2Clamp, representative dominant DGGE bands were excised & sequenced.			ITSintfor2 and ITS2Clamp
2452	Acropora hyacinthus	ITS2	Cladocopium C3u	C3u		Cape Panwa	Western Indo-Pacific	Andaman	Andaman Sea Coral Coast	0	5	7.8073	98.4092	Geosymbio	Geosymbio	DGGE of ITS2 & sequencing	2	2007	2	2007	LaJeunesse 2010 JBiogeograph Long-standing environmental conditions isolation and host–symbiont specificity	ITS2 primers: ITSintfor2 and ITS2Clamp, representative dominant DGGE bands were excised & sequenced.			ITSintfor2 and ITS2Clamp
2453	Acropora hyacinthus	ITS2	Cladocopium C3u	C3u		Cape Panwa	Western Indo-Pacific	Andaman	Andaman Sea Coral Coast	0	5	7.8073	98.4092	Geosymbio	Geosymbio	DGGE of ITS2 & sequencing	2	2007	2	2007	LaJeunesse 2010 JBiogeograph Long-standing environmental conditions isolation and host–symbiont specificity	ITS2 primers: ITSintfor2 and ITS2Clamp, representative dominant DGGE bands were excised & sequenced.			ITSintfor2 and ITS2Clamp
2454	Acropora hyacinthus	ITS2	Cladocopium C3u	C3u		Ko Phi Phi Don	Western Indo-Pacific	Andaman	Andaman Sea Coral Coast	2	6	7.7333	98.7667	Geosymbio	Geosymbio	DGGE of ITS2 & sequencing	2	2007	2	2007	LaJeunesse 2010 JBiogeograph Long-standing environmental conditions isolation and host–symbiont specificity	ITS2 primers: ITSintfor2 and ITS2Clamp, representative dominant DGGE bands were excised & sequenced.			ITSintfor2 and ITS2Clamp
2455	Acropora hyacinthus	ITS2	Cladocopium C3u	C3u		Ko Phi Phi Leh	Western Indo-Pacific	Andaman	Andaman Sea Coral Coast	6	12	7.7333	98.7667	Geosymbio	Geosymbio	DGGE of ITS2 & sequencing	2	2007	2	2007	LaJeunesse 2010 JBiogeograph Long-standing environmental conditions isolation and host–symbiont specificity	ITS2 primers: ITSintfor2 and ITS2Clamp, representative dominant DGGE bands were excised & sequenced.			ITSintfor2 and ITS2Clamp
2456	Acropora hyacinthus	ITS2	Cladocopium C94a	C94a		Koh Hae	Western Indo-Pacific	Andaman	Andaman Sea Coral Coast	2	6	7.7456	98.3763	Geosymbio	Geosymbio	DGGE of ITS2 & sequencing	2	2007	2	2007	LaJeunesse 2010 JBiogeograph Long-standing environmental conditions isolation and host–symbiont specificity	ITS2 primers: ITSintfor2 and ITS2Clamp, representative dominant DGGE bands were excised & sequenced.			ITSintfor2 and ITS2Clamp
3310	Acropora hyacinthus	ITS2	Durusdinium D1-4	D1-4		Ofu Island, American Samoa	Eastern Indo-Pacific	Central Polynesia	Samoa Islands	1	3	-14.177	-169.652	Aquarist	Riddle 2011, Advanced Aquarist, Advanced Aquarist	Direct sequencing of ITS1	3	2007	3	2007	Oliver 2011 CoralReefs Many corals host thermally resistant symbionts in high-temperature habit	ITS1 primers: S-DINO and D1R-rev, direct sequencing of PCR products		S-DINO and D1R-rev
3311	Acropora hyacinthus	ITS2	Durusdinium D1-4	D1-4		Ofu Island, American Samoa	Eastern Indo-Pacific	Central Polynesia	Samoa Islands	1	3	-14.177	-169.652	Aquarist	Riddle 2011, Advanced Aquarist, Advanced Aquarist	Direct sequencing of ITS1	3	2007	3	2007	Oliver 2011 CoralReefs Many corals host thermally resistant symbionts in high-temperature habit	ITS1 primers: S-DINO and D1R-rev, direct sequencing of PCR products		S-DINO and D1R-rev
3312	Acropora hyacinthus	ITS2	Durusdinium D1-4	D1-4		Ofu Island, American Samoa	Eastern Indo-Pacific	Central Polynesia	Samoa Islands	1	3	-14.177	-169.652	Aquarist	Riddle 2011, Advanced Aquarist, Advanced Aquarist	Direct sequencing of ITS1	3	2007	3	2007	Oliver 2011 CoralReefs Many corals host thermally resistant symbionts in high-temperature habit	ITS1 primers: S-DINO and D1R-rev, direct sequencing of PCR products		S-DINO and D1R-rev
3313	Acropora hyacinthus	ITS2	Durusdinium D1-4	D1-4		Ofu Island, American Samoa	Eastern Indo-Pacific	Central Polynesia	Samoa Islands	1	3	-14.177	-169.652	Aquarist	Riddle 2011, Advanced Aquarist, Advanced Aquarist	Direct sequencing of ITS1	3	2007	3	2007	Oliver 2011 CoralReefs Many corals host thermally resistant symbionts in high-temperature habit	ITS1 primers: S-DINO and D1R-rev, direct sequencing of PCR products		S-DINO and D1R-rev
3314	Acropora hyacinthus	ITS2	Durusdinium D1-4	D1-4		Ofu Island, American Samoa	Eastern Indo-Pacific	Central Polynesia	Samoa Islands	1	3	-14.177	-169.652	Aquarist	Riddle 2011, Advanced Aquarist, Advanced Aquarist	Direct sequencing of ITS1	3	2007	3	2007	Oliver 2011 CoralReefs Many corals host thermally resistant symbionts in high-temperature habit	ITS1 primers: S-DINO and D1R-rev, direct sequencing of PCR products		S-DINO and D1R-rev
3315	Acropora hyacinthus	ITS2	Durusdinium D1-4	D1-4		Ofu Island, American Samoa	Eastern Indo-Pacific	Central Polynesia	Samoa Islands	1	3	-14.177	-169.652	Aquarist	Riddle 2011, Advanced Aquarist, Advanced Aquarist	Direct sequencing of ITS1	3	2007	3	2007	Oliver 2011 CoralReefs Many corals host thermally resistant symbionts in high-temperature habit	ITS1 primers: S-DINO and D1R-rev, direct sequencing of PCR products		S-DINO and D1R-rev
3316	Acropora hyacinthus	ITS2	Durusdinium D1-4	D1-4		Ofu Island, American Samoa	Eastern Indo-Pacific	Central Polynesia	Samoa Islands	1	3	-14.177	-169.652	Aquarist	Riddle 2011, Advanced Aquarist, Advanced Aquarist	Direct sequencing of ITS1	3	2007	3	2007	Oliver 2011 CoralReefs Many corals host thermally resistant symbionts in high-temperature habit	ITS1 primers: S-DINO and D1R-rev, direct sequencing of PCR products		S-DINO and D1R-rev
3317	Acropora hyacinthus	ITS2	Durusdinium D1-4	D1-4		Ofu Island, American Samoa	Eastern Indo-Pacific	Central Polynesia	Samoa Islands	1	3	-14.177	-169.652	Aquarist	Riddle 2011, Advanced Aquarist, Advanced Aquarist	Direct sequencing of ITS1	3	2007	3	2007	Oliver 2011 CoralReefs Many corals host thermally resistant symbionts in high-temperature habit	ITS1 primers: S-DINO and D1R-rev, direct sequencing of PCR products		S-DINO and D1R-rev
3318	Acropora hyacinthus	ITS2	Durusdinium D1-4	D1-4		Ofu Island, American Samoa	Eastern Indo-Pacific	Central Polynesia	Samoa Islands	1	3	-14.177	-169.652	Aquarist	Riddle 2011, Advanced Aquarist, Advanced Aquarist	Direct sequencing of ITS1	3	2007	3	2007	Oliver 2011 CoralReefs Many corals host thermally resistant symbionts in high-temperature habit	ITS1 primers: S-DINO and D1R-rev, direct sequencing of PCR products		S-DINO and D1R-rev
3319	Acropora hyacinthus	ITS2	Durusdinium D1-4	D1-4		Ofu Island, American Samoa	Eastern Indo-Pacific	Central Polynesia	Samoa Islands	1	3	-14.177	-169.652	Aquarist	Riddle 2011, Advanced Aquarist, Advanced Aquarist	Direct sequencing of ITS1	3	2007	3	2007	Oliver 2011 CoralReefs Many corals host thermally resistant symbionts in high-temperature habit	ITS1 primers: S-DINO and D1R-rev, direct sequencing of PCR products		S-DINO and D1R-rev
3320	Acropora hyacinthus	ITS2	Durusdinium D1-4	D1-4		Ofu Island, American Samoa	Eastern Indo-Pacific	Central Polynesia	Samoa Islands	1	3	-14.177	-169.652	Aquarist	Riddle 2011, Advanced Aquarist, Advanced Aquarist	Direct sequencing of ITS1	3	2007	3	2007	Oliver 2011 CoralReefs Many corals host thermally resistant symbionts in high-temperature habit	ITS1 primers: S-DINO and D1R-rev, direct sequencing of PCR products		S-DINO and D1R-rev
3321	Acropora hyacinthus	ITS2	Durusdinium D1-4	D1-4		Ofu Island, American Samoa	Eastern Indo-Pacific	Central Polynesia	Samoa Islands	1	3	-14.177	-169.652	Aquarist	Riddle 2011, Advanced Aquarist, Advanced Aquarist	Direct sequencing of ITS1	3	2007	3	2007	Oliver 2011 CoralReefs Many corals host thermally resistant symbionts in high-temperature habit	ITS1 primers: S-DINO and D1R-rev, direct sequencing of PCR products		S-DINO and D1R-rev
3322	Acropora hyacinthus	ITS2	Durusdinium D1-4	D1-4		Ofu Island, American Samoa	Eastern Indo-Pacific	Central Polynesia	Samoa Islands	1	3	-14.177	-169.652	Aquarist	Riddle 2011, Advanced Aquarist, Advanced Aquarist	Direct sequencing of ITS1	3	2007	3	2007	Oliver 2011 CoralReefs Many corals host thermally resistant symbionts in high-temperature habit	ITS1 primers: S-DINO and D1R-rev, direct sequencing of PCR products		S-DINO and D1R-rev
3323	Acropora hyacinthus	ITS2	Durusdinium D1-4	D1-4		Ofu Island, American Samoa	Eastern Indo-Pacific	Central Polynesia	Samoa Islands	1	3	-14.177	-169.652	Aquarist	Riddle 2011, Advanced Aquarist, Advanced Aquarist	Direct sequencing of ITS1	3	2007	3	2007	Oliver 2011 CoralReefs Many corals host thermally resistant symbionts in high-temperature habit	ITS1 primers: S-DINO and D1R-rev, direct sequencing of PCR products		S-DINO and D1R-rev
3324	Acropora hyacinthus	ITS2	Durusdinium D1-4	D1-4		Ofu Island, American Samoa	Eastern Indo-Pacific	Central Polynesia	Samoa Islands	1	3	-14.177	-169.652	Aquarist	Riddle 2011, Advanced Aquarist, Advanced Aquarist	Direct sequencing of ITS1	3	2007	3	2007	Oliver 2011 CoralReefs Many corals host thermally resistant symbionts in high-temperature habit	ITS1 primers: S-DINO and D1R-rev, direct sequencing of PCR products		S-DINO and D1R-rev
3325	Acropora hyacinthus	ITS2	Durusdinium DOli11	DOli11		Ofu Island, American Samoa	Eastern Indo-Pacific	Central Polynesia	Samoa Islands	1	3	-14.177	-169.652	Aquarist	Riddle 2011, Advanced Aquarist, Advanced Aquarist	Direct sequencing of ITS1	3	2007	3	2007	Oliver 2011 CoralReefs Many corals host thermally resistant symbionts in high-temperature habit	ITS1 primers: S-DINO and D1R-rev, direct sequencing of PCR products		S-DINO and D1R-rev
3326	Acropora hyacinthus	ITS2	Durusdinium DOli11	DOli11		Ofu Island, American Samoa	Eastern Indo-Pacific	Central Polynesia	Samoa Islands	1	3	-14.177	-169.652	Aquarist	Riddle 2011, Advanced Aquarist, Advanced Aquarist	Direct sequencing of ITS1	3	2007	3	2007	Oliver 2011 CoralReefs Many corals host thermally resistant symbionts in high-temperature habit	ITS1 primers: S-DINO and D1R-rev, direct sequencing of PCR products		S-DINO and D1R-rev
3327	Acropora hyacinthus	ITS2	Durusdinium DOli11	DOli11		Ofu Island, American Samoa	Eastern Indo-Pacific	Central Polynesia	Samoa Islands	1	3	-14.177	-169.652	Aquarist	Riddle 2011, Advanced Aquarist, Advanced Aquarist	Direct sequencing of ITS1	3	2007	3	2007	Oliver 2011 CoralReefs Many corals host thermally resistant symbionts in high-temperature habit	ITS1 primers: S-DINO and D1R-rev, direct sequencing of PCR products		S-DINO and D1R-rev
3328	Acropora hyacinthus	ITS2	Durusdinium DOli11	DOli11		Ofu Island, American Samoa	Eastern Indo-Pacific	Central Polynesia	Samoa Islands	1	3	-14.177	-169.652	Aquarist	Riddle 2011, Advanced Aquarist, Advanced Aquarist	Direct sequencing of ITS1	3	2007	3	2007	Oliver 2011 CoralReefs Many corals host thermally resistant symbionts in high-temperature habit	ITS1 primers: S-DINO and D1R-rev, direct sequencing of PCR products		S-DINO and D1R-rev
3329	Acropora hyacinthus	ITS2	Durusdinium DOli11	DOli11		Ofu Island, American Samoa	Eastern Indo-Pacific	Central Polynesia	Samoa Islands	1	3	-14.177	-169.652	Aquarist	Riddle 2011, Advanced Aquarist, Advanced Aquarist	Direct sequencing of ITS1	3	2007	3	2007	Oliver 2011 CoralReefs Many corals host thermally resistant symbionts in high-temperature habit	ITS1 primers: S-DINO and D1R-rev, direct sequencing of PCR products		S-DINO and D1R-rev
3330	Acropora hyacinthus	ITS2	Durusdinium DOli11	DOli11		Ofu Island, American Samoa	Eastern Indo-Pacific	Central Polynesia	Samoa Islands	1	3	-14.177	-169.652	Aquarist	Riddle 2011, Advanced Aquarist, Advanced Aquarist	Direct sequencing of ITS1	3	2007	3	2007	Oliver 2011 CoralReefs Many corals host thermally resistant symbionts in high-temperature habit	ITS1 primers: S-DINO and D1R-rev, direct sequencing of PCR products		S-DINO and D1R-rev
3331	Acropora hyacinthus	ITS2	Durusdinium DOli11	DOli11		Ofu Island, American Samoa	Eastern Indo-Pacific	Central Polynesia	Samoa Islands	1	3	-14.177	-169.652	Aquarist	Riddle 2011, Advanced Aquarist, Advanced Aquarist	Direct sequencing of ITS1	3	2007	3	2007	Oliver 2011 CoralReefs Many corals host thermally resistant symbionts in high-temperature habit	ITS1 primers: S-DINO and D1R-rev, direct sequencing of PCR products		S-DINO and D1R-rev
3332	Acropora hyacinthus	ITS2	Durusdinium DOli11	DOli11		Ofu Island, American Samoa	Eastern Indo-Pacific	Central Polynesia	Samoa Islands	1	3	-14.177	-169.652	Aquarist	Riddle 2011, Advanced Aquarist, Advanced Aquarist	Direct sequencing of ITS1	3	2007	3	2007	Oliver 2011 CoralReefs Many corals host thermally resistant symbionts in high-temperature habit	ITS1 primers: S-DINO and D1R-rev, direct sequencing of PCR products		S-DINO and D1R-rev
3333	Acropora hyacinthus	ITS2	Durusdinium DOli11	DOli11		Ofu Island, American Samoa	Eastern Indo-Pacific	Central Polynesia	Samoa Islands	1	3	-14.177	-169.652	Aquarist	Riddle 2011, Advanced Aquarist, Advanced Aquarist	Direct sequencing of ITS1	3	2007	3	2007	Oliver 2011 CoralReefs Many corals host thermally resistant symbionts in high-temperature habit	ITS1 primers: S-DINO and D1R-rev, direct sequencing of PCR products		S-DINO and D1R-rev
15935	Acropora latistella	ITS2	Cladocopium C115	C115		Tuléar	Western Indo-Pacific	Western Indian Ocean	Western and Northern Madagascar	1	30	-23.3	43.6	Original publication	Original publication	DGGE of ITS2 & sequencing	11	2009	11	2009	Boonstra 2011 Diss Latitudinal Patterns in the Distribution of Algal Symbionts	ITS2 primers: ITSintfor2 and ITS2Clamp, dominant bands of each characteristic profile were excised & sequenced. Variants co-occuring with main bands were identified.			ITSintfor2 and ITS2Clamp
15937	Acropora latistella	ITS2	Cladocopium C115	C115		Tuléar	Western Indo-Pacific	Western Indian Ocean	Western and Northern Madagascar	1	30	-23.3	43.6	Original publication	Original publication	DGGE of ITS2 & sequencing	11	2009	11	2009	Boonstra 2011 Diss Latitudinal Patterns in the Distribution of Algal Symbionts	ITS2 primers: ITSintfor2 and ITS2Clamp, dominant bands of each characteristic profile were excised & sequenced. Variants co-occuring with main bands were identified.			ITSintfor2 and ITS2Clamp
15932	Acropora latistella	ITS2	Cladocopium C1g	C1g		Tuléar	Western Indo-Pacific	Western Indian Ocean	Western and Northern Madagascar	1	30	-23.3	43.6	Original publication	Original publication	DGGE of ITS2 & sequencing	11	2009	11	2009	Boonstra 2011 Diss Latitudinal Patterns in the Distribution of Algal Symbionts	ITS2 primers: ITSintfor2 and ITS2Clamp, dominant bands of each characteristic profile were excised & sequenced. Variants co-occuring with main bands were identified.			ITSintfor2 and ITS2Clamp
15933	Acropora latistella	ITS2	Cladocopium C1g	C1g		Tuléar	Western Indo-Pacific	Western Indian Ocean	Western and Northern Madagascar	1	30	-23.3	43.6	Original publication	Original publication	DGGE of ITS2 & sequencing	11	2009	11	2009	Boonstra 2011 Diss Latitudinal Patterns in the Distribution of Algal Symbionts	ITS2 primers: ITSintfor2 and ITS2Clamp, dominant bands of each characteristic profile were excised & sequenced. Variants co-occuring with main bands were identified.			ITSintfor2 and ITS2Clamp
9644	Acropora latistella	ITS2	Cladocopium C21	C21		Curaçao Island	Central Indo-Pacific	Northeast Australian Shelf	Central and Southern Great Barrier Reef	1	6	-18.67	146.549	Riddle 2011	Riddle 2011, Advanced Aquarist	DGGE of ITS2 & sequencing	5	2003	5	2003	LaJeunesse 2004 MEPS Closely related Symbiodinium spp differ in relative dominance	ITS2 primers: ITSintfor2 and ITS2Clamp, representative dominant DGGE bands were excised & sequenced.			ITSintfor2 and ITS2Clamp
15934	Acropora latistella	ITS2	Cladocopium C3	C3		Tuléar	Western Indo-Pacific	Western Indian Ocean	Western and Northern Madagascar	1	30	-23.3	43.6	Original publication	Original publication	DGGE of ITS2 & sequencing	11	2009	11	2009	Boonstra 2011 Diss Latitudinal Patterns in the Distribution of Algal Symbionts	ITS2 primers: ITSintfor2 and ITS2Clamp, dominant bands of each characteristic profile were excised & sequenced. Variants co-occuring with main bands were identified.			ITSintfor2 and ITS2Clamp
15936	Acropora latistella	ITS2	Cladocopium C3	C3		Tuléar	Western Indo-Pacific	Western Indian Ocean	Western and Northern Madagascar	1	30	-23.3	43.6	Original publication	Original publication	DGGE of ITS2 & sequencing	11	2009	11	2009	Boonstra 2011 Diss Latitudinal Patterns in the Distribution of Algal Symbionts	ITS2 primers: ITSintfor2 and ITS2Clamp, dominant bands of each characteristic profile were excised & sequenced. Variants co-occuring with main bands were identified.			ITSintfor2 and ITS2Clamp
8799	Acropora latistella	ITS2	Cladocopium C3	C3		Heron Island, GBR	Central Indo-Pacific	Northeast Australian Shelf	Central and Southern GBR	3	3	-23	152	Original pub	Original pub	DGGE of ITS2 & sequencing	2	2002	3	2002	LaJeunesse 2003 LimnolOceanogr Low symbiont diversity in southern Great Barrier Reef	ITS2 primers: ITSintfor2 and ITS2Clamp, representative dominant DGGE bands were excised & sequenced.			ITSintfor2 and ITS2Clamp
8800	Acropora latistella	ITS2	Cladocopium C3	C3		Heron Island, GBR	Central Indo-Pacific	Northeast Australian Shelf	Central and Southern GBR	10	10	-23	152	Original pub	Original pub	DGGE of ITS2 & sequencing	2	2002	3	2002	LaJeunesse 2003 LimnolOceanogr Low symbiont diversity in southern Great Barrier Reef	ITS2 primers: ITSintfor2 and ITS2Clamp, representative dominant DGGE bands were excised & sequenced.			ITSintfor2 and ITS2Clamp
13350	Acropora latistella	ITS2	Cladocopium C3	C3		Stephens Hole (Lord Howe Island)	Central Indo-Pacific	Lord Howe and Norfolk Islands	Lord Howe and Norfolk Islands	2	3	-31.5322	-159.504	Direct From Source	Direct From Source	DGGE of ITS2 & sequencing	1	2007	1	2007	Wicks 2010 CoralReefs Local endemicity and high diversity characterise high-latitudecoral–Symbiodiniumpartnerships	ITS2 primers: ITSintfor2 and ITS2Clamp, dominant DGGE bands were excised amplified and sequenced. Main bands were verified			ITSintfor2 and ITS2Clamp
13351	Acropora latistella	ITS2	Cladocopium C3	C3		Stephens Hole (Lord Howe Island)	Central Indo-Pacific	Lord Howe and Norfolk Islands	Lord Howe and Norfolk Islands	2	3	-31.5322	-159.504	Direct From Source	Direct From Source	DGGE of ITS2 & sequencing	1	2007	1	2007	Wicks 2010 CoralReefs Local endemicity and high diversity characterise high-latitudecoral–Symbiodiniumpartnerships	ITS2 primers: ITSintfor2 and ITS2Clamp, dominant DGGE bands were excised amplified and sequenced. Main bands were verified			ITSintfor2 and ITS2Clamp
13352	Acropora latistella	ITS2	Cladocopium C3	C3		Stephens Hole (Lord Howe Island)	Central Indo-Pacific	Lord Howe and Norfolk Islands	Lord Howe and Norfolk Islands	2	3	-31.5322	-159.504	Direct From Source	Direct From Source	DGGE of ITS2 & sequencing	1	2007	1	2007	Wicks 2010 CoralReefs Local endemicity and high diversity characterise high-latitudecoral–Symbiodiniumpartnerships	ITS2 primers: ITSintfor2 and ITS2Clamp, dominant DGGE bands were excised amplified and sequenced. Main bands were verified			ITSintfor2 and ITS2Clamp
14068	Acropora latistella	ITS2	Cladocopium C3ii	C3ii		Dampier	Central Indo-Pacific	Northwest Australian Shelf	Exmouth to Broome	0	7	-20.6595	116.708			DGGE of ITS2 & sequencing	6	2005	6	2005	Silverstein 2011 MEPS Novel algal symbiont diversity in reef corals of Western Australia	ITS2 primers: ITSintfor2 and ITS2Clamp, dominant DGGE bands were excised and sequenced			ITSintfor2 and ITS2Clamp
8158	Acropora latistella	ITS2	Cladocopium C3u	C3u		Tanga	Western Indo-Pacific	Western Indian Ocean	East African Coral Coast	1	7	-5.15382	39.115	Direct from publication	Direct from publication	DGGE of ITS2 & sequencing	8	2008	8	2008	Chauka 2012 WIndOceaJMarSci Diversity of Symbiodinium in Tanzania	ITS2 primers: ITSintfor2 and ITSintrev2, dominant bands were excised & sequenced. Intragenomic variants identified.			ITSintfor2 and ITSintrev2
8159	Acropora latistella	ITS2	Cladocopium C3u	C3u		Tanga	Western Indo-Pacific	Western Indian Ocean	East African Coral Coast	1	7	-5.15382	39.115	Direct from publication	Direct from publication	DGGE of ITS2 & sequencing	8	2008	8	2008	Chauka 2012 WIndOceaJMarSci Diversity of Symbiodinium in Tanzania	ITS2 primers: ITSintfor2 and ITSintrev2, dominant bands were excised & sequenced. Intragenomic variants identified.			ITSintfor2 and ITSintrev2
8160	Acropora latistella	ITS2	Cladocopium C3u	C3u		Tanga	Western Indo-Pacific	Western Indian Ocean	East African Coral Coast	1	7	-5.15382	39.115	Direct from publication	Direct from publication	DGGE of ITS2 & sequencing	8	2008	8	2008	Chauka 2012 WIndOceaJMarSci Diversity of Symbiodinium in Tanzania	ITS2 primers: ITSintfor2 and ITSintrev2, dominant bands were excised & sequenced. Intragenomic variants identified.			ITSintfor2 and ITSintrev2
8161	Acropora latistella	ITS2	Cladocopium C3u	C3u		Tanga	Western Indo-Pacific	Western Indian Ocean	East African Coral Coast	1	7	-5.15382	39.115	Direct from publication	Direct from publication	DGGE of ITS2 & sequencing	8	2008	8	2008	Chauka 2012 WIndOceaJMarSci Diversity of Symbiodinium in Tanzania	ITS2 primers: ITSintfor2 and ITSintrev2, dominant bands were excised & sequenced. Intragenomic variants identified.			ITSintfor2 and ITSintrev2
8162	Acropora latistella	ITS2	Cladocopium C3u	C3u		Tanga	Western Indo-Pacific	Western Indian Ocean	East African Coral Coast	1	7	-5.15382	39.115	Direct from publication	Direct from publication	DGGE of ITS2 & sequencing	8	2008	8	2008	Chauka 2012 WIndOceaJMarSci Diversity of Symbiodinium in Tanzania	ITS2 primers: ITSintfor2 and ITSintrev2, dominant bands were excised & sequenced. Intragenomic variants identified.			ITSintfor2 and ITSintrev2
8163	Acropora latistella	ITS2	Cladocopium C3u	C3u		Tanga	Western Indo-Pacific	Western Indian Ocean	East African Coral Coast	1	7	-5.15382	39.115	Direct from publication	Direct from publication	DGGE of ITS2 & sequencing	8	2008	8	2008	Chauka 2012 WIndOceaJMarSci Diversity of Symbiodinium in Tanzania	ITS2 primers: ITSintfor2 and ITSintrev2, dominant bands were excised & sequenced. Intragenomic variants identified.			ITSintfor2 and ITSintrev2
8164	Acropora latistella	ITS2	Cladocopium C3z	C3z		Zanzibar	Western Indo-Pacific	Western Indian Ocean	East African Coral Coast	1	7	-6.15262	39.136	Direct from publication	Direct from publication	DGGE of ITS2 & sequencing	4	2008	4	2008	Chauka 2012 WIndOceaJMarSci Diversity of Symbiodinium in Tanzania	ITS2 primers: ITSintfor2 and ITSintrev2, dominant bands were excised & sequenced. Intragenomic variants identified.			ITSintfor2 and ITSintrev2
8165	Acropora latistella	ITS2	Cladocopium C3z	C3z		Zanzibar	Western Indo-Pacific	Western Indian Ocean	East African Coral Coast	1	7	-6.15262	39.136	Direct from publication	Direct from publication	DGGE of ITS2 & sequencing	4	2008	4	2008	Chauka 2012 WIndOceaJMarSci Diversity of Symbiodinium in Tanzania	ITS2 primers: ITSintfor2 and ITSintrev2, dominant bands were excised & sequenced. Intragenomic variants identified.			ITSintfor2 and ITSintrev2
8166	Acropora latistella	ITS2	Cladocopium C3z	C3z		Zanzibar	Western Indo-Pacific	Western Indian Ocean	East African Coral Coast	1	7	-6.15262	39.136	Direct from publication	Direct from publication	DGGE of ITS2 & sequencing	4	2008	4	2008	Chauka 2012 WIndOceaJMarSci Diversity of Symbiodinium in Tanzania	ITS2 primers: ITSintfor2 and ITSintrev2, dominant bands were excised & sequenced. Intragenomic variants identified.			ITSintfor2 and ITSintrev2
8167	Acropora latistella	ITS2	Cladocopium C3z	C3z		Zanzibar	Western Indo-Pacific	Western Indian Ocean	East African Coral Coast	1	7	-6.15262	39.136	Direct from publication	Direct from publication	DGGE of ITS2 & sequencing	4	2008	4	2008	Chauka 2012 WIndOceaJMarSci Diversity of Symbiodinium in Tanzania	ITS2 primers: ITSintfor2 and ITSintrev2, dominant bands were excised & sequenced. Intragenomic variants identified.			ITSintfor2 and ITSintrev2
8943	Acropora latistella	ITS2	Cladocopium C3z	C3z		Bawe	Western Indo-Pacific	Western Indian Ocean	East African Coral Coast	2	6	-6.15054	39.1315	Geosymbio	Geosymbio	DGGE of ITS2 & sequencing	4	2007	4	2007	LaJeunesse 2010 JBiogeograph Long-standing environmental conditions isolation and host–symbiont specificity	ITS2 primers: ITSintfor2 and ITS2Clamp, representative dominant DGGE bands were excised & sequenced.			ITSintfor2 and ITS2Clamp
8944	Acropora latistella	ITS2	Cladocopium C3z	C3z		Bawe	Western Indo-Pacific	Western Indian Ocean	East African Coral Coast	2	6	-6.15054	39.1315	Geosymbio	Geosymbio	DGGE of ITS2 & sequencing	4	2007	4	2007	LaJeunesse 2010 JBiogeograph Long-standing environmental conditions isolation and host–symbiont specificity	ITS2 primers: ITSintfor2 and ITS2Clamp, representative dominant DGGE bands were excised & sequenced.			ITSintfor2 and ITS2Clamp
8945	Acropora latistella	ITS2	Cladocopium C3z	C3z		Changuu	Western Indo-Pacific	Western Indian Ocean	East African Coral Coast	2	6	-6.12007	39.1681	Geosymbio	Geosymbio	DGGE of ITS2 & sequencing	4	2007	4	2007	LaJeunesse 2010 JBiogeograph Long-standing environmental conditions isolation and host–symbiont specificity	ITS2 primers: ITSintfor2 and ITS2Clamp, representative dominant DGGE bands were excised & sequenced.			ITSintfor2 and ITS2Clamp
14069	Acropora latistella	ITS2	Cladocopium C40	C40		Dampier	Central Indo-Pacific	Northwest Australian Shelf	Exmouth to Broome	0	7	-20.6595	116.708			DGGE of ITS2 & sequencing	6	2005	6	2005	Silverstein 2011 MEPS Novel algal symbiont diversity in reef corals of Western Australia	ITS2 primers: ITSintfor2 and ITS2Clamp, dominant DGGE bands were excised and sequenced			ITSintfor2 and ITS2Clamp
14070	Acropora latistella	ITS2	Cladocopium C40	C40		Dampier	Central Indo-Pacific	Northwest Australian Shelf	Exmouth to Broome	0	7	-20.6595	116.708			DGGE of ITS2 & sequencing	6	2005	6	2005	Silverstein 2011 MEPS Novel algal symbiont diversity in reef corals of Western Australia	ITS2 primers: ITSintfor2 and ITS2Clamp, dominant DGGE bands were excised and sequenced			ITSintfor2 and ITS2Clamp
14071	Acropora latistella	ITS2	Cladocopium C40	C40		Dampier	Central Indo-Pacific	Northwest Australian Shelf	Exmouth to Broome	0	7	-20.6595	116.708			DGGE of ITS2 & sequencing	6	2005	6	2005	Silverstein 2011 MEPS Novel algal symbiont diversity in reef corals of Western Australia	ITS2 primers: ITSintfor2 and ITS2Clamp, dominant DGGE bands were excised and sequenced			ITSintfor2 and ITS2Clamp
14072	Acropora latistella	ITS2	Durusdinium D1-4	D1-4		Dampier	Central Indo-Pacific	Northwest Australian Shelf	Exmouth to Broome	0	7	-20.6595	116.708			DGGE of ITS2 & sequencing	6	2005	6	2005	Silverstein 2011 MEPS Novel algal symbiont diversity in reef corals of Western Australia	ITS2 primers: ITSintfor2 and ITS2Clamp, dominant DGGE bands were excised and sequenced			ITSintfor2 and ITS2Clamp
9838	Acropora loripes	ITS2	Cladocopium C3	C3		Orpheus Island, GBR	Central Indo-Pacific	Northeast Australian Shelf	Central and Southern GBR	NA	NA	-18.6061	146.491	Original pub	Original pub	SSCP of ITS1	NA	2003	NA	2006	Abrego 2009 MolEcol Highly infectious symbiont dominates	ITS1 Primers: symITSFP and SymITSRP; SSCP sensitivity ~10%; single SSCP band for most samples; few samples w >1 band were reported as mixed Symbio types		symITSFP and SymITSRP
9646	Acropora loripes	ITS2	Cladocopium C3	C3		Rib Reef GBR	Central Indo-Pacific	Northeast Australian Shelf	Central and Southern Great Barrier Reef	1	8	-18.4781	146.871	Riddle 2011	Riddle 2011, Advanced Aquarist	DGGE of ITS2 & sequencing	5	2003	5	2003	LaJeunesse 2004 MEPS Closely related Symbiodinium spp differ in relative dominance	ITS2 primers: ITSintfor2 and ITS2Clamp, representative dominant DGGE bands were excised & sequenced.			ITSintfor2 and ITS2Clamp
9474	Acropora loripes	ITS2	Cladocopium C3i	C3i		Trunk Reef, GBR	Central Indo-Pacific	Northeast Australian Shelf	Central and Southern GBR	NA	NA	-18.3498	146.827	Original pub	Original pub	SSCP of ITS1	NA	1998	NA	1998	van Oppen 2001 ProcRSocB Patterns of coral–dinoflagellate associations in Acropora	ITS1 Primers: symITSFP and SymITSRP; SSCP analysis and sequencing			symITSFP and SymITSRP
9475	Acropora loripes	ITS2	Cladocopium C3i	C3i		Trunk Reef, GBR	Central Indo-Pacific	Northeast Australian Shelf	Central and Southern GBR	NA	NA	-18.3498	146.827	Original pub	Original pub	SSCP of ITS1	NA	1998	NA	1998	van Oppen 2001 ProcRSocB Patterns of coral–dinoflagellate associations in Acropora	ITS1 Primers: symITSFP and SymITSRP; SSCP analysis and sequencing			symITSFP and SymITSRP
9476	Acropora loripes	ITS2	Cladocopium C3i	C3i		Trunk Reef, GBR	Central Indo-Pacific	Northeast Australian Shelf	Central and Southern GBR	NA	NA	-18.3498	146.827	Original pub	Original pub	SSCP of ITS1	NA	1998	NA	1998	van Oppen 2001 ProcRSocB Patterns of coral–dinoflagellate associations in Acropora	ITS1 Primers: symITSFP and SymITSRP; SSCP analysis and sequencing			symITSFP and SymITSRP
8168	Acropora loripes	ITS2	Cladocopium C3u	C3u		Tanga	Western Indo-Pacific	Western Indian Ocean	East African Coral Coast	1	7	-5.15382	39.115	Direct from publication	Direct from publication	DGGE of ITS2 & sequencing	8	2008	8	2008	Chauka 2012 WIndOceaJMarSci Diversity of Symbiodinium in Tanzania	ITS2 primers: ITSintfor2 and ITSintrev2, dominant bands were excised & sequenced. Intragenomic variants identified.			ITSintfor2 and ITSintrev2
8169	Acropora loripes	ITS2	Cladocopium C3u	C3u		Tanga	Western Indo-Pacific	Western Indian Ocean	East African Coral Coast	1	7	-5.15382	39.115	Direct from publication	Direct from publication	DGGE of ITS2 & sequencing	8	2008	8	2008	Chauka 2012 WIndOceaJMarSci Diversity of Symbiodinium in Tanzania	ITS2 primers: ITSintfor2 and ITSintrev2, dominant bands were excised & sequenced. Intragenomic variants identified.			ITSintfor2 and ITSintrev2
8170	Acropora loripes	ITS2	Cladocopium C3u	C3u		Tanga	Western Indo-Pacific	Western Indian Ocean	East African Coral Coast	1	7	-5.15382	39.115	Direct from publication	Direct from publication	DGGE of ITS2 & sequencing	8	2008	8	2008	Chauka 2012 WIndOceaJMarSci Diversity of Symbiodinium in Tanzania	ITS2 primers: ITSintfor2 and ITSintrev2, dominant bands were excised & sequenced. Intragenomic variants identified.			ITSintfor2 and ITSintrev2
8171	Acropora loripes	ITS2	Cladocopium C3u	C3u		Tanga	Western Indo-Pacific	Western Indian Ocean	East African Coral Coast	1	7	-5.15382	39.115	Direct from publication	Direct from publication	DGGE of ITS2 & sequencing	8	2008	8	2008	Chauka 2012 WIndOceaJMarSci Diversity of Symbiodinium in Tanzania	ITS2 primers: ITSintfor2 and ITSintrev2, dominant bands were excised & sequenced. Intragenomic variants identified.			ITSintfor2 and ITSintrev2
8172	Acropora loripes	ITS2	Cladocopium C3u	C3u		Tanga	Western Indo-Pacific	Western Indian Ocean	East African Coral Coast	1	7	-5.15382	39.115	Direct from publication	Direct from publication	DGGE of ITS2 & sequencing	8	2008	8	2008	Chauka 2012 WIndOceaJMarSci Diversity of Symbiodinium in Tanzania	ITS2 primers: ITSintfor2 and ITSintrev2, dominant bands were excised & sequenced. Intragenomic variants identified.			ITSintfor2 and ITSintrev2
8173	Acropora loripes	ITS2	Cladocopium C3u	C3u		Tanga	Western Indo-Pacific	Western Indian Ocean	East African Coral Coast	1	7	-5.15382	39.115	Direct from publication	Direct from publication	DGGE of ITS2 & sequencing	8	2008	8	2008	Chauka 2012 WIndOceaJMarSci Diversity of Symbiodinium in Tanzania	ITS2 primers: ITSintfor2 and ITSintrev2, dominant bands were excised & sequenced. Intragenomic variants identified.			ITSintfor2 and ITSintrev2
8175	Acropora loripes	ITS2	Cladocopium C3u	C3u		Zanzibar	Western Indo-Pacific	Western Indian Ocean	East African Coral Coast	1	7	-6.15262	39.136	Direct from publication	Direct from publication	DGGE of ITS2 & sequencing	4	2008	4	2008	Chauka 2012 WIndOceaJMarSci Diversity of Symbiodinium in Tanzania	ITS2 primers: ITSintfor2 and ITSintrev2, dominant bands were excised & sequenced. Intragenomic variants identified.			ITSintfor2 and ITSintrev2
8176	Acropora loripes	ITS2	Cladocopium C3u	C3u		Zanzibar	Western Indo-Pacific	Western Indian Ocean	East African Coral Coast	1	7	-6.15262	39.136	Direct from publication	Direct from publication	DGGE of ITS2 & sequencing	4	2008	4	2008	Chauka 2012 WIndOceaJMarSci Diversity of Symbiodinium in Tanzania	ITS2 primers: ITSintfor2 and ITSintrev2, dominant bands were excised & sequenced. Intragenomic variants identified.			ITSintfor2 and ITSintrev2
8174	Acropora loripes	ITS2	Cladocopium C3z	C3z		Zanzibar	Western Indo-Pacific	Western Indian Ocean	East African Coral Coast	1	7	-6.15262	39.136	Direct from publication	Direct from publication	DGGE of ITS2 & sequencing	4	2008	4	2008	Chauka 2012 WIndOceaJMarSci Diversity of Symbiodinium in Tanzania	ITS2 primers: ITSintfor2 and ITSintrev2, dominant bands were excised & sequenced. Intragenomic variants identified.			ITSintfor2 and ITSintrev2
8946	Acropora loripes	ITS2	Cladocopium C3z	C3z		Bawe	Western Indo-Pacific	Western Indian Ocean	East African Coral Coast	2	6	-6.15054	39.1315	Geosymbio	Geosymbio	DGGE of ITS2 & sequencing	4	2007	4	2007	LaJeunesse 2010 JBiogeograph Long-standing environmental conditions isolation and host–symbiont specificity	ITS2 primers: ITSintfor2 and ITS2Clamp, representative dominant DGGE bands were excised & sequenced.			ITSintfor2 and ITS2Clamp
9647	Acropora loripes	ITS2	Durusdinium D2	D2		Feather Reef GBR	Central Indo-Pacific	Northeast Australian Shelf	Central and Southern Great Barrier Reef	10	17	-17.5083	146.377	Riddle 2011	Riddle 2011, Advanced Aquarist	DGGE of ITS2 & sequencing	5	2003	5	2003	LaJeunesse 2004 MEPS Closely related Symbiodinium spp differ in relative dominance	ITS2 primers: ITSintfor2 and ITS2Clamp, representative dominant DGGE bands were excised & sequenced.			ITSintfor2 and ITS2Clamp
7476	Acropora millepora	ITS2	Cladocopium C1	C1		Pioneer Bay, Orpheus Island, GBR	Central Indo-Pacific	Northeast Australian Shelf	Central and Southern GBR	NA	NA	-18.597	146.491	Original pub	Original pub	SSCP of ITS1	NA	2000	NA	2000	van Oppen 2001 ProcRSocB Patterns of coral–dinoflagellate associations in Acropora	ITS1 Primers: symITSFP and SymITSRP; SSCP analysis and sequencing			symITSFP and SymITSRP
2457	Acropora millepora	ITS2	Cladocopium C101	C101		Similan Islands	Western Indo-Pacific	Andaman	Andaman Sea Coral Coast	2	12	8.6525	97.6408	Geosymbio	Geosymbio	DGGE of ITS2 & sequencing	2	2007	2	2007	LaJeunesse 2010 JBiogeograph Long-standing environmental conditions isolation and host–symbiont specificity	ITS2 primers: ITSintfor2 and ITS2Clamp, representative dominant DGGE bands were excised & sequenced.			ITSintfor2 and ITS2Clamp
15466	Acropora millepora	ITS2	Cladocopium C21	C21		NA	NA	NA	NA	NA	NA	NA	NA	Original pub	Original pub	DGGE of ITS2 & sequencing	NA	NA	NA	NA	Smith 2009 JPhycol symbiodinium (dinophyta) diversity and stability in aquarium	ITS2 primers: ITSintfor2 and ITS2Clamp, dominant DGGE bands were excised and sequenced			ITSintfor2 and ITS2Clamp
9839	Acropora millepora	ITS2	Cladocopium C3	C3		Orpheus Island, GBR	Central Indo-Pacific	Northeast Australian Shelf	Central and Southern GBR	NA	NA	-18.6061	146.491	Original pub	Original pub	SSCP of ITS1	NA	2003	NA	2006	Abrego 2009 MolEcol Highly infectious symbiont dominates	ITS1 Primers: symITSFP and SymITSRP; SSCP sensitivity ~10%; single SSCP band for most samples; few samples w >1 band were reported as mixed Symbio types		symITSFP and SymITSRP
9840	Acropora millepora	ITS2	Cladocopium C3	C3		Orpheus Island, GBR	Central Indo-Pacific	Northeast Australian Shelf	Central and Southern GBR	NA	NA	-18.6061	146.491	Original pub	Original pub	SSCP of ITS1	NA	2003	NA	2006	Abrego 2009 MolEcol Highly infectious symbiont dominates	ITS1 Primers: symITSFP and SymITSRP; SSCP sensitivity ~10%; single SSCP band for most samples; few samples w >1 band were reported as mixed Symbio types		symITSFP and SymITSRP
9841	Acropora millepora	ITS2	Cladocopium C3	C3		Orpheus Island, GBR	Central Indo-Pacific	Northeast Australian Shelf	Central and Southern GBR	NA	NA	-18.6061	146.491	Original pub	Original pub	SSCP of ITS1	NA	2003	NA	2006	Abrego 2009 MolEcol Highly infectious symbiont dominates	ITS1 Primers: symITSFP and SymITSRP; SSCP sensitivity ~10%; single SSCP band for most samples; few samples w >1 band were reported as mixed Symbio types		symITSFP and SymITSRP
9842	Acropora millepora	ITS2	Cladocopium C3	C3		Orpheus Island, GBR	Central Indo-Pacific	Northeast Australian Shelf	Central and Southern GBR	NA	NA	-18.6061	146.491	Original pub	Original pub	SSCP of ITS1	NA	2003	NA	2006	Abrego 2009 MolEcol Highly infectious symbiont dominates	ITS1 Primers: symITSFP and SymITSRP; SSCP sensitivity ~10%; single SSCP band for most samples; few samples w >1 band were reported as mixed Symbio types		symITSFP and SymITSRP
9843	Acropora millepora	ITS2	Cladocopium C3	C3		Orpheus Island, GBR	Central Indo-Pacific	Northeast Australian Shelf	Central and Southern GBR	NA	NA	-18.6061	146.491	Original pub	Original pub	SSCP of ITS1	NA	2003	NA	2006	Abrego 2009 MolEcol Highly infectious symbiont dominates	ITS1 Primers: symITSFP and SymITSRP; SSCP sensitivity ~10%; single SSCP band for most samples; few samples w >1 band were reported as mixed Symbio types		symITSFP and SymITSRP
9844	Acropora millepora	ITS2	Cladocopium C3	C3		Orpheus Island, GBR	Central Indo-Pacific	Northeast Australian Shelf	Central and Southern GBR	NA	NA	-18.6061	146.491	Original pub	Original pub	SSCP of ITS1	NA	2003	NA	2006	Abrego 2009 MolEcol Highly infectious symbiont dominates	ITS1 Primers: symITSFP and SymITSRP; SSCP sensitivity ~10%; single SSCP band for most samples; few samples w >1 band were reported as mixed Symbio types		symITSFP and SymITSRP
9845	Acropora millepora	ITS2	Cladocopium C3	C3		Orpheus Island, GBR	Central Indo-Pacific	Northeast Australian Shelf	Central and Southern GBR	NA	NA	-18.6061	146.491	Original pub	Original pub	SSCP of ITS1	NA	2003	NA	2006	Abrego 2009 MolEcol Highly infectious symbiont dominates	ITS1 Primers: symITSFP and SymITSRP; SSCP sensitivity ~10%; single SSCP band for most samples; few samples w >1 band were reported as mixed Symbio types		symITSFP and SymITSRP
9846	Acropora millepora	ITS2	Cladocopium C3	C3		Orpheus Island, GBR	Central Indo-Pacific	Northeast Australian Shelf	Central and Southern GBR	NA	NA	-18.6061	146.491	Original pub	Original pub	SSCP of ITS1	NA	2003	NA	2006	Abrego 2009 MolEcol Highly infectious symbiont dominates	ITS1 Primers: symITSFP and SymITSRP; SSCP sensitivity ~10%; single SSCP band for most samples; few samples w >1 band were reported as mixed Symbio types		symITSFP and SymITSRP
9847	Acropora millepora	ITS2	Cladocopium C3	C3		Orpheus Island, GBR	Central Indo-Pacific	Northeast Australian Shelf	Central and Southern GBR	NA	NA	-18.6061	146.491	Original pub	Original pub	SSCP of ITS1	NA	2003	NA	2006	Abrego 2009 MolEcol Highly infectious symbiont dominates	ITS1 Primers: symITSFP and SymITSRP; SSCP sensitivity ~10%; single SSCP band for most samples; few samples w >1 band were reported as mixed Symbio types		symITSFP and SymITSRP
9848	Acropora millepora	ITS2	Cladocopium C3	C3		Orpheus Island, GBR	Central Indo-Pacific	Northeast Australian Shelf	Central and Southern GBR	NA	NA	-18.6061	146.491	Original pub	Original pub	SSCP of ITS1	NA	2003	NA	2006	Abrego 2009 MolEcol Highly infectious symbiont dominates	ITS1 Primers: symITSFP and SymITSRP; SSCP sensitivity ~10%; single SSCP band for most samples; few samples w >1 band were reported as mixed Symbio types		symITSFP and SymITSRP
9849	Acropora millepora	ITS2	Cladocopium C3	C3		Orpheus Island, GBR	Central Indo-Pacific	Northeast Australian Shelf	Central and Southern GBR	NA	NA	-18.6061	146.491	Original pub	Original pub	SSCP of ITS1	NA	2003	NA	2006	Abrego 2009 MolEcol Highly infectious symbiont dominates	ITS1 Primers: symITSFP and SymITSRP; SSCP sensitivity ~10%; single SSCP band for most samples; few samples w >1 band were reported as mixed Symbio types		symITSFP and SymITSRP
9850	Acropora millepora	ITS2	Cladocopium C3	C3		Orpheus Island, GBR	Central Indo-Pacific	Northeast Australian Shelf	Central and Southern GBR	NA	NA	-18.6061	146.491	Original pub	Original pub	SSCP of ITS1	NA	2003	NA	2006	Abrego 2009 MolEcol Highly infectious symbiont dominates	ITS1 Primers: symITSFP and SymITSRP; SSCP sensitivity ~10%; single SSCP band for most samples; few samples w >1 band were reported as mixed Symbio types		symITSFP and SymITSRP
9851	Acropora millepora	ITS2	Cladocopium C3	C3		Orpheus Island, GBR	Central Indo-Pacific	Northeast Australian Shelf	Central and Southern GBR	NA	NA	-18.6061	146.491	Original pub	Original pub	SSCP of ITS1	NA	2003	NA	2006	Abrego 2009 MolEcol Highly infectious symbiont dominates	ITS1 Primers: symITSFP and SymITSRP; SSCP sensitivity ~10%; single SSCP band for most samples; few samples w >1 band were reported as mixed Symbio types		symITSFP and SymITSRP
9852	Acropora millepora	ITS2	Cladocopium C3	C3		Orpheus Island, GBR	Central Indo-Pacific	Northeast Australian Shelf	Central and Southern GBR	NA	NA	-18.6061	146.491	Original pub	Original pub	SSCP of ITS1	NA	2003	NA	2006	Abrego 2009 MolEcol Highly infectious symbiont dominates	ITS1 Primers: symITSFP and SymITSRP; SSCP sensitivity ~10%; single SSCP band for most samples; few samples w >1 band were reported as mixed Symbio types		symITSFP and SymITSRP
9853	Acropora millepora	ITS2	Cladocopium C3	C3		Orpheus Island, GBR	Central Indo-Pacific	Northeast Australian Shelf	Central and Southern GBR	NA	NA	-18.6061	146.491	Original pub	Original pub	SSCP of ITS1	NA	2003	NA	2006	Abrego 2009 MolEcol Highly infectious symbiont dominates	ITS1 Primers: symITSFP and SymITSRP; SSCP sensitivity ~10%; single SSCP band for most samples; few samples w >1 band were reported as mixed Symbio types		symITSFP and SymITSRP
208	Acropora millepora	ITS2	Cladocopium C3	C3		Keppels, GBR	Central Indo-Pacific	Northeast Australian Shelf	Central and Southern GBR	2	4	-23.06	150.9	Aquarist	Riddle 2011, Advanced Aquarist, Advanced Aquarist	SSCP of ITS1 & sequencing	7	2002	7	2002	Berkelmans 2006 ProcSocRoyB The role of zooxanthellae in the thermal tolerance of corals a nugget of hope	ITS1 Primers: symITSFP and SymITSRP; SSCP(sensitivity ~5-10%) and sequencing analysis		symITSFP and SymITSRP
209	Acropora millepora	ITS2	Cladocopium C3	C3		Keppels, GBR	Central Indo-Pacific	Northeast Australian Shelf	Central and Southern GBR	2	4	-23.06	150.9	Aquarist	Riddle 2011, Advanced Aquarist, Advanced Aquarist	SSCP of ITS1 & sequencing	7	2002	7	2002	Berkelmans 2006 ProcSocRoyB The role of zooxanthellae in the thermal tolerance of corals a nugget of hope	ITS1 Primers: symITSFP and SymITSRP; SSCP(sensitivity ~5-10%) and sequencing analysis		symITSFP and SymITSRP
210	Acropora millepora	ITS2	Cladocopium C3	C3		Keppels, GBR	Central Indo-Pacific	Northeast Australian Shelf	Central and Southern GBR	2	4	-23.06	150.9	Aquarist	Riddle 2011, Advanced Aquarist, Advanced Aquarist	SSCP of ITS1 & sequencing	7	2002	7	2002	Berkelmans 2006 ProcSocRoyB The role of zooxanthellae in the thermal tolerance of corals a nugget of hope	ITS1 Primers: symITSFP and SymITSRP; SSCP(sensitivity ~5-10%) and sequencing analysis		symITSFP and SymITSRP
211	Acropora millepora	ITS2	Cladocopium C3	C3		Keppels, GBR	Central Indo-Pacific	Northeast Australian Shelf	Central and Southern GBR	2	4	-23.06	150.9	Aquarist	Riddle 2011, Advanced Aquarist, Advanced Aquarist	SSCP of ITS1 & sequencing	7	2002	7	2002	Berkelmans 2006 ProcSocRoyB The role of zooxanthellae in the thermal tolerance of corals a nugget of hope	ITS1 Primers: symITSFP and SymITSRP; SSCP(sensitivity ~5-10%) and sequencing analysis		symITSFP and SymITSRP
212	Acropora millepora	ITS2	Cladocopium C3	C3		Keppels, GBR	Central Indo-Pacific	Northeast Australian Shelf	Central and Southern GBR	2	4	-23.06	150.9	Aquarist	Riddle 2011, Advanced Aquarist, Advanced Aquarist	SSCP of ITS1 & sequencing	7	2002	7	2002	Berkelmans 2006 ProcSocRoyB The role of zooxanthellae in the thermal tolerance of corals a nugget of hope	ITS1 Primers: symITSFP and SymITSRP; SSCP(sensitivity ~5-10%) and sequencing analysis		symITSFP and SymITSRP
213	Acropora millepora	ITS2	Cladocopium C3	C3		Keppels, GBR	Central Indo-Pacific	Northeast Australian Shelf	Central and Southern GBR	2	4	-23.06	150.9	Aquarist	Riddle 2011, Advanced Aquarist, Advanced Aquarist	SSCP of ITS1 & sequencing	7	2002	7	2002	Berkelmans 2006 ProcSocRoyB The role of zooxanthellae in the thermal tolerance of corals a nugget of hope	ITS1 Primers: symITSFP and SymITSRP; SSCP(sensitivity ~5-10%) and sequencing analysis		symITSFP and SymITSRP
214	Acropora millepora	ITS2	Cladocopium C3	C3		Keppels, GBR	Central Indo-Pacific	Northeast Australian Shelf	Central and Southern GBR	2	4	-23.06	150.9	Aquarist	Riddle 2011, Advanced Aquarist, Advanced Aquarist	SSCP of ITS1 & sequencing	7	2002	7	2002	Berkelmans 2006 ProcSocRoyB The role of zooxanthellae in the thermal tolerance of corals a nugget of hope	ITS1 Primers: symITSFP and SymITSRP; SSCP(sensitivity ~5-10%) and sequencing analysis		symITSFP and SymITSRP
215	Acropora millepora	ITS2	Cladocopium C3	C3		Keppels, GBR	Central Indo-Pacific	Northeast Australian Shelf	Central and Southern GBR	2	4	-23.06	150.9	Aquarist	Riddle 2011, Advanced Aquarist, Advanced Aquarist	SSCP of ITS1 & sequencing	7	2002	7	2002	Berkelmans 2006 ProcSocRoyB The role of zooxanthellae in the thermal tolerance of corals a nugget of hope	ITS1 Primers: symITSFP and SymITSRP; SSCP(sensitivity ~5-10%) and sequencing analysis		symITSFP and SymITSRP
216	Acropora millepora	ITS2	Cladocopium C3	C3		Keppels, GBR	Central Indo-Pacific	Northeast Australian Shelf	Central and Southern GBR	2	4	-23.06	150.9	Aquarist	Riddle 2011, Advanced Aquarist, Advanced Aquarist	SSCP of ITS1 & sequencing	7	2002	7	2002	Berkelmans 2006 ProcSocRoyB The role of zooxanthellae in the thermal tolerance of corals a nugget of hope	ITS1 Primers: symITSFP and SymITSRP; SSCP(sensitivity ~5-10%) and sequencing analysis		symITSFP and SymITSRP
217	Acropora millepora	ITS2	Cladocopium C3	C3		Keppels, GBR	Central Indo-Pacific	Northeast Australian Shelf	Central and Southern GBR	2	4	-23.06	150.9	Aquarist	Riddle 2011, Advanced Aquarist, Advanced Aquarist	SSCP of ITS1 & sequencing	7	2002	7	2002	Berkelmans 2006 ProcSocRoyB The role of zooxanthellae in the thermal tolerance of corals a nugget of hope	ITS1 Primers: symITSFP and SymITSRP; SSCP(sensitivity ~5-10%) and sequencing analysis		symITSFP and SymITSRP
218	Acropora millepora	ITS2	Cladocopium C3	C3		Keppels, GBR	Central Indo-Pacific	Northeast Australian Shelf	Central and Southern GBR	2	4	-23.06	150.9	Aquarist	Riddle 2011, Advanced Aquarist, Advanced Aquarist	SSCP of ITS1 & sequencing	7	2002	7	2002	Berkelmans 2006 ProcSocRoyB The role of zooxanthellae in the thermal tolerance of corals a nugget of hope	ITS1 Primers: symITSFP and SymITSRP; SSCP(sensitivity ~5-10%) and sequencing analysis		symITSFP and SymITSRP
219	Acropora millepora	ITS2	Cladocopium C3	C3		Keppels, GBR	Central Indo-Pacific	Northeast Australian Shelf	Central and Southern GBR	2	4	-23.06	150.9	Aquarist	Riddle 2011, Advanced Aquarist, Advanced Aquarist	SSCP of ITS1 & sequencing	7	2002	7	2002	Berkelmans 2006 ProcSocRoyB The role of zooxanthellae in the thermal tolerance of corals a nugget of hope	ITS1 Primers: symITSFP and SymITSRP; SSCP(sensitivity ~5-10%) and sequencing analysis		symITSFP and SymITSRP
220	Acropora millepora	ITS2	Cladocopium C3	C3		Keppels, GBR	Central Indo-Pacific	Northeast Australian Shelf	Central and Southern GBR	2	4	-23.06	150.9	Aquarist	Riddle 2011, Advanced Aquarist, Advanced Aquarist	SSCP of ITS1 & sequencing	7	2002	7	2002	Berkelmans 2006 ProcSocRoyB The role of zooxanthellae in the thermal tolerance of corals a nugget of hope	ITS1 Primers: symITSFP and SymITSRP; SSCP(sensitivity ~5-10%) and sequencing analysis		symITSFP and SymITSRP
221	Acropora millepora	ITS2	Cladocopium C3	C3		Keppels, GBR	Central Indo-Pacific	Northeast Australian Shelf	Central and Southern GBR	2	4	-23.06	150.9	Aquarist	Riddle 2011, Advanced Aquarist, Advanced Aquarist	SSCP of ITS1 & sequencing	7	2002	7	2002	Berkelmans 2006 ProcSocRoyB The role of zooxanthellae in the thermal tolerance of corals a nugget of hope	ITS1 Primers: symITSFP and SymITSRP; SSCP(sensitivity ~5-10%) and sequencing analysis		symITSFP and SymITSRP
222	Acropora millepora	ITS2	Cladocopium C3	C3		Keppels, GBR	Central Indo-Pacific	Northeast Australian Shelf	Central and Southern GBR	2	4	-23.06	150.9	Aquarist	Riddle 2011, Advanced Aquarist, Advanced Aquarist	SSCP of ITS1 & sequencing	7	2002	7	2002	Berkelmans 2006 ProcSocRoyB The role of zooxanthellae in the thermal tolerance of corals a nugget of hope	ITS1 Primers: symITSFP and SymITSRP; SSCP(sensitivity ~5-10%) and sequencing analysis		symITSFP and SymITSRP
223	Acropora millepora	ITS2	Cladocopium C3	C3		Keppels, GBR	Central Indo-Pacific	Northeast Australian Shelf	Central and Southern GBR	2	4	-23.06	150.9	Aquarist	Riddle 2011, Advanced Aquarist, Advanced Aquarist	SSCP of ITS1 & sequencing	7	2002	7	2002	Berkelmans 2006 ProcSocRoyB The role of zooxanthellae in the thermal tolerance of corals a nugget of hope	ITS1 Primers: symITSFP and SymITSRP; SSCP(sensitivity ~5-10%) and sequencing analysis		symITSFP and SymITSRP
224	Acropora millepora	ITS2	Cladocopium C3	C3		Keppels, GBR	Central Indo-Pacific	Northeast Australian Shelf	Central and Southern GBR	2	4	-23.06	150.9	Aquarist	Riddle 2011, Advanced Aquarist, Advanced Aquarist	SSCP of ITS1 & sequencing	7	2002	7	2002	Berkelmans 2006 ProcSocRoyB The role of zooxanthellae in the thermal tolerance of corals a nugget of hope	ITS1 Primers: symITSFP and SymITSRP; SSCP(sensitivity ~5-10%) and sequencing analysis		symITSFP and SymITSRP
225	Acropora millepora	ITS2	Cladocopium C3	C3		Keppels, GBR	Central Indo-Pacific	Northeast Australian Shelf	Central and Southern GBR	2	4	-23.06	150.9	Aquarist	Riddle 2011, Advanced Aquarist, Advanced Aquarist	SSCP of ITS1 & sequencing	7	2002	7	2002	Berkelmans 2006 ProcSocRoyB The role of zooxanthellae in the thermal tolerance of corals a nugget of hope	ITS1 Primers: symITSFP and SymITSRP; SSCP(sensitivity ~5-10%) and sequencing analysis		symITSFP and SymITSRP
1614	Acropora millepora	ITS2	Cladocopium C3	C3		Heron Island, GBR	Central Indo-Pacific	Northeast Australian Shelf	Central and Southern GBR	0	1	-23.43	151.9	SymbioGBR	SymbioGBR	SSCP of ITS2 & sequencing	12	2002	12	2002	Fisher 2012 CoralReefs The effect of temperature stress on coral-Symbiodinium associations	ITS2 primers: ITSintfor2 and ITS-Reverse , dominant bands in SSCP profiles were randomly excised & sequenced			ITSintfor2 and ITS-Reverse
1615	Acropora millepora	ITS2	Cladocopium C3	C3		Heron Island, GBR	Central Indo-Pacific	Northeast Australian Shelf	Central and Southern GBR	0	1	-23.43	151.9	SymbioGBR	SymbioGBR	SSCP of ITS2 & sequencing	12	2002	12	2002	Fisher 2012 CoralReefs The effect of temperature stress on coral-Symbiodinium associations	ITS2 primers: ITSintfor2 and ITS-Reverse , dominant bands in SSCP profiles were randomly excised & sequenced			ITSintfor2 and ITS-Reverse
1616	Acropora millepora	ITS2	Cladocopium C3	C3		Heron Island, GBR	Central Indo-Pacific	Northeast Australian Shelf	Central and Southern GBR	0	1	-23.43	151.9	SymbioGBR	SymbioGBR	SSCP of ITS2 & sequencing	12	2002	12	2002	Fisher 2012 CoralReefs The effect of temperature stress on coral-Symbiodinium associations	ITS2 primers: ITSintfor2 and ITS-Reverse , dominant bands in SSCP profiles were randomly excised & sequenced			ITSintfor2 and ITS-Reverse
1617	Acropora millepora	ITS2	Cladocopium C3	C3		Heron Island, GBR	Central Indo-Pacific	Northeast Australian Shelf	Central and Southern GBR	0	1	-23.43	151.9	SymbioGBR	SymbioGBR	SSCP of ITS2 & sequencing	12	2002	12	2002	Fisher 2012 CoralReefs The effect of temperature stress on coral-Symbiodinium associations	ITS2 primers: ITSintfor2 and ITS-Reverse , dominant bands in SSCP profiles were randomly excised & sequenced			ITSintfor2 and ITS-Reverse
1618	Acropora millepora	ITS2	Cladocopium C3	C3		Heron Island, GBR	Central Indo-Pacific	Northeast Australian Shelf	Central and Southern GBR	0	1	-23.43	151.9	SymbioGBR	SymbioGBR	SSCP of ITS2 & sequencing	12	2002	12	2002	Fisher 2012 CoralReefs The effect of temperature stress on coral-Symbiodinium associations	ITS2 primers: ITSintfor2 and ITS-Reverse , dominant bands in SSCP profiles were randomly excised & sequenced			ITSintfor2 and ITS-Reverse
1619	Acropora millepora	ITS2	Cladocopium C3	C3		Heron Island, GBR	Central Indo-Pacific	Northeast Australian Shelf	Central and Southern GBR	0	1	-23.43	151.9	SymbioGBR	SymbioGBR	SSCP of ITS2 & sequencing	12	2002	12	2002	Fisher 2012 CoralReefs The effect of temperature stress on coral-Symbiodinium associations	ITS2 primers: ITSintfor2 and ITS-Reverse , dominant bands in SSCP profiles were randomly excised & sequenced			ITSintfor2 and ITS-Reverse
19882	Acropora millepora	ITS2	Cladocopium C3	C3		Heron Island, GBR	Central Indo-Pacific	Northeast Australian Shelf	Central and Southern GBR	0	1	-23.43	151.9	SymbioGBR	SymbioGBR	SSCP of ITS2 & sequencing	12	2002	12	2002	Fisher 2012 CoralReefs The effect of temperature stress on coral-Symbiodinium associations	ITS2 primers: ITSintfor2 and ITS-Reverse , dominant bands in SSCP profiles were randomly excised & sequenced			ITSintfor2 and ITS-Reverse
1760	Acropora millepora	ITS2	Cladocopium C3	C3		Miall Island	Central Indo-Pacific	Northeast Australian Shelf	Central and Southern GBR	0	3	-23.15	150.9	Direct from Pub	Direct from Pub	SSCP of ITS1, cloning & sequencing	9	2004	3	2005	Jones 2008 ProcRSocB Community change in the endosymbionts of a coral after a bleaching event	ITS1 primers: symITSFP and SymITSRP, novel SSCP profiles were cloned and sequenced		symITSFP and SymITSRP
1761	Acropora millepora	ITS2	Cladocopium C3	C3		Miall Island	Central Indo-Pacific	Northeast Australian Shelf	Central and Southern GBR	0	3	-23.15	150.9	Direct from Pub	Direct from Pub	SSCP of ITS1, cloning & sequencing	9	2004	3	2005	Jones 2008 ProcRSocB Community change in the endosymbionts of a coral after a bleaching event	ITS1 primers: symITSFP and SymITSRP, novel SSCP profiles were cloned and sequenced		symITSFP and SymITSRP
1762	Acropora millepora	ITS2	Cladocopium C3	C3		Miall Island	Central Indo-Pacific	Northeast Australian Shelf	Central and Southern GBR	0	3	-23.15	150.9	Direct from Pub	Direct from Pub	SSCP of ITS1, cloning & sequencing	9	2004	3	2005	Jones 2008 ProcRSocB Community change in the endosymbionts of a coral after a bleaching event	ITS1 primers: symITSFP and SymITSRP, novel SSCP profiles were cloned and sequenced		symITSFP and SymITSRP
1763	Acropora millepora	ITS2	Cladocopium C3	C3		Miall Island	Central Indo-Pacific	Northeast Australian Shelf	Central and Southern GBR	0	3	-23.15	150.9	Direct from Pub	Direct from Pub	SSCP of ITS1, cloning & sequencing	9	2004	3	2005	Jones 2008 ProcRSocB Community change in the endosymbionts of a coral after a bleaching event	ITS1 primers: symITSFP and SymITSRP, novel SSCP profiles were cloned and sequenced		symITSFP and SymITSRP
1764	Acropora millepora	ITS2	Cladocopium C3	C3		Miall Island	Central Indo-Pacific	Northeast Australian Shelf	Central and Southern GBR	0	3	-23.15	150.9	Direct from Pub	Direct from Pub	SSCP of ITS1, cloning & sequencing	9	2004	3	2005	Jones 2008 ProcRSocB Community change in the endosymbionts of a coral after a bleaching event	ITS1 primers: symITSFP and SymITSRP, novel SSCP profiles were cloned and sequenced		symITSFP and SymITSRP
1765	Acropora millepora	ITS2	Cladocopium C3	C3		Miall Island	Central Indo-Pacific	Northeast Australian Shelf	Central and Southern GBR	0	3	-23.15	150.9	Direct from Pub	Direct from Pub	SSCP of ITS1, cloning & sequencing	9	2004	3	2005	Jones 2008 ProcRSocB Community change in the endosymbionts of a coral after a bleaching event	ITS1 primers: symITSFP and SymITSRP, novel SSCP profiles were cloned and sequenced		symITSFP and SymITSRP
1766	Acropora millepora	ITS2	Cladocopium C3	C3		Miall Island	Central Indo-Pacific	Northeast Australian Shelf	Central and Southern GBR	0	3	-23.15	150.9	Direct from Pub	Direct from Pub	SSCP of ITS1, cloning & sequencing	9	2004	3	2005	Jones 2008 ProcRSocB Community change in the endosymbionts of a coral after a bleaching event	ITS1 primers: symITSFP and SymITSRP, novel SSCP profiles were cloned and sequenced		symITSFP and SymITSRP
1767	Acropora millepora	ITS2	Cladocopium C3	C3		Miall Island	Central Indo-Pacific	Northeast Australian Shelf	Central and Southern GBR	0	3	-23.15	150.9	Direct from Pub	Direct from Pub	SSCP of ITS1, cloning & sequencing	9	2004	3	2005	Jones 2008 ProcRSocB Community change in the endosymbionts of a coral after a bleaching event	ITS1 primers: symITSFP and SymITSRP, novel SSCP profiles were cloned and sequenced		symITSFP and SymITSRP
1768	Acropora millepora	ITS2	Cladocopium C3	C3		Miall Island	Central Indo-Pacific	Northeast Australian Shelf	Central and Southern GBR	0	3	-23.15	150.9	Direct from Pub	Direct from Pub	SSCP of ITS1, cloning & sequencing	9	2004	3	2005	Jones 2008 ProcRSocB Community change in the endosymbionts of a coral after a bleaching event	ITS1 primers: symITSFP and SymITSRP, novel SSCP profiles were cloned and sequenced		symITSFP and SymITSRP
1769	Acropora millepora	ITS2	Cladocopium C3	C3		Miall Island	Central Indo-Pacific	Northeast Australian Shelf	Central and Southern GBR	0	3	-23.15	150.9	Direct from Pub	Direct from Pub	SSCP of ITS1, cloning & sequencing	9	2004	3	2005	Jones 2008 ProcRSocB Community change in the endosymbionts of a coral after a bleaching event	ITS1 primers: symITSFP and SymITSRP, novel SSCP profiles were cloned and sequenced		symITSFP and SymITSRP
1770	Acropora millepora	ITS2	Cladocopium C3	C3		Miall Island	Central Indo-Pacific	Northeast Australian Shelf	Central and Southern GBR	0	3	-23.15	150.9	Direct from Pub	Direct from Pub	SSCP of ITS1, cloning & sequencing	9	2004	3	2005	Jones 2008 ProcRSocB Community change in the endosymbionts of a coral after a bleaching event	ITS1 primers: symITSFP and SymITSRP, novel SSCP profiles were cloned and sequenced		symITSFP and SymITSRP
1771	Acropora millepora	ITS2	Cladocopium C3	C3		Miall Island	Central Indo-Pacific	Northeast Australian Shelf	Central and Southern GBR	0	3	-23.15	150.9	Direct from Pub	Direct from Pub	SSCP of ITS1, cloning & sequencing	9	2004	3	2005	Jones 2008 ProcRSocB Community change in the endosymbionts of a coral after a bleaching event	ITS1 primers: symITSFP and SymITSRP, novel SSCP profiles were cloned and sequenced		symITSFP and SymITSRP
1772	Acropora millepora	ITS2	Cladocopium C3	C3		Miall Island	Central Indo-Pacific	Northeast Australian Shelf	Central and Southern GBR	0	3	-23.15	150.9	Direct from Pub	Direct from Pub	SSCP of ITS1, cloning & sequencing	9	2004	3	2005	Jones 2008 ProcRSocB Community change in the endosymbionts of a coral after a bleaching event	ITS1 primers: symITSFP and SymITSRP, novel SSCP profiles were cloned and sequenced		symITSFP and SymITSRP
1773	Acropora millepora	ITS2	Cladocopium C3	C3		Miall Island	Central Indo-Pacific	Northeast Australian Shelf	Central and Southern GBR	0	3	-23.15	150.9	Direct from Pub	Direct from Pub	SSCP of ITS1, cloning & sequencing	9	2004	3	2005	Jones 2008 ProcRSocB Community change in the endosymbionts of a coral after a bleaching event	ITS1 primers: symITSFP and SymITSRP, novel SSCP profiles were cloned and sequenced		symITSFP and SymITSRP
1774	Acropora millepora	ITS2	Cladocopium C3	C3		Miall Island	Central Indo-Pacific	Northeast Australian Shelf	Central and Southern GBR	0	3	-23.15	150.9	Direct from Pub	Direct from Pub	SSCP of ITS1, cloning & sequencing	9	2004	3	2005	Jones 2008 ProcRSocB Community change in the endosymbionts of a coral after a bleaching event	ITS1 primers: symITSFP and SymITSRP, novel SSCP profiles were cloned and sequenced		symITSFP and SymITSRP
1775	Acropora millepora	ITS2	Cladocopium C3	C3		Miall Island	Central Indo-Pacific	Northeast Australian Shelf	Central and Southern GBR	0	3	-23.15	150.9	Direct from Pub	Direct from Pub	SSCP of ITS1, cloning & sequencing	9	2004	3	2005	Jones 2008 ProcRSocB Community change in the endosymbionts of a coral after a bleaching event	ITS1 primers: symITSFP and SymITSRP, novel SSCP profiles were cloned and sequenced		symITSFP and SymITSRP
1776	Acropora millepora	ITS2	Cladocopium C3	C3		Miall Island	Central Indo-Pacific	Northeast Australian Shelf	Central and Southern GBR	0	3	-23.15	150.9	Direct from Pub	Direct from Pub	SSCP of ITS1, cloning & sequencing	9	2004	3	2005	Jones 2008 ProcRSocB Community change in the endosymbionts of a coral after a bleaching event	ITS1 primers: symITSFP and SymITSRP, novel SSCP profiles were cloned and sequenced		symITSFP and SymITSRP
1777	Acropora millepora	ITS2	Cladocopium C3	C3		Miall Island	Central Indo-Pacific	Northeast Australian Shelf	Central and Southern GBR	0	3	-23.15	150.9	Direct from Pub	Direct from Pub	SSCP of ITS1, cloning & sequencing	9	2004	3	2005	Jones 2008 ProcRSocB Community change in the endosymbionts of a coral after a bleaching event	ITS1 primers: symITSFP and SymITSRP, novel SSCP profiles were cloned and sequenced		symITSFP and SymITSRP
1778	Acropora millepora	ITS2	Cladocopium C3	C3		Miall Island	Central Indo-Pacific	Northeast Australian Shelf	Central and Southern GBR	0	3	-23.15	150.9	Direct from Pub	Direct from Pub	SSCP of ITS1, cloning & sequencing	9	2004	3	2005	Jones 2008 ProcRSocB Community change in the endosymbionts of a coral after a bleaching event	ITS1 primers: symITSFP and SymITSRP, novel SSCP profiles were cloned and sequenced		symITSFP and SymITSRP
1779	Acropora millepora	ITS2	Cladocopium C3	C3		Miall Island	Central Indo-Pacific	Northeast Australian Shelf	Central and Southern GBR	0	3	-23.15	150.9	Direct from Pub	Direct from Pub	SSCP of ITS1, cloning & sequencing	9	2004	3	2005	Jones 2008 ProcRSocB Community change in the endosymbionts of a coral after a bleaching event	ITS1 primers: symITSFP and SymITSRP, novel SSCP profiles were cloned and sequenced		symITSFP and SymITSRP
1780	Acropora millepora	ITS2	Cladocopium C3	C3		Miall Island	Central Indo-Pacific	Northeast Australian Shelf	Central and Southern GBR	0	3	-23.15	150.9	Direct from Pub	Direct from Pub	SSCP of ITS1, cloning & sequencing	9	2004	3	2005	Jones 2008 ProcRSocB Community change in the endosymbionts of a coral after a bleaching event	ITS1 primers: symITSFP and SymITSRP, novel SSCP profiles were cloned and sequenced		symITSFP and SymITSRP
1781	Acropora millepora	ITS2	Cladocopium C3	C3		Miall Island	Central Indo-Pacific	Northeast Australian Shelf	Central and Southern GBR	0	3	-23.15	150.9	Direct from Pub	Direct from Pub	SSCP of ITS1, cloning & sequencing	9	2004	3	2005	Jones 2008 ProcRSocB Community change in the endosymbionts of a coral after a bleaching event	ITS1 primers: symITSFP and SymITSRP, novel SSCP profiles were cloned and sequenced		symITSFP and SymITSRP
1782	Acropora millepora	ITS2	Cladocopium C3	C3		Miall Island	Central Indo-Pacific	Northeast Australian Shelf	Central and Southern GBR	0	3	-23.15	150.9	Direct from Pub	Direct from Pub	SSCP of ITS1, cloning & sequencing	9	2004	3	2005	Jones 2008 ProcRSocB Community change in the endosymbionts of a coral after a bleaching event	ITS1 primers: symITSFP and SymITSRP, novel SSCP profiles were cloned and sequenced		symITSFP and SymITSRP
1783	Acropora millepora	ITS2	Cladocopium C3	C3		Miall Island	Central Indo-Pacific	Northeast Australian Shelf	Central and Southern GBR	0	3	-23.15	150.9	Direct from Pub	Direct from Pub	SSCP of ITS1, cloning & sequencing	9	2004	3	2005	Jones 2008 ProcRSocB Community change in the endosymbionts of a coral after a bleaching event	ITS1 primers: symITSFP and SymITSRP, novel SSCP profiles were cloned and sequenced		symITSFP and SymITSRP
1784	Acropora millepora	ITS2	Cladocopium C3	C3		Miall Island	Central Indo-Pacific	Northeast Australian Shelf	Central and Southern GBR	0	3	-23.15	150.9	Direct from Pub	Direct from Pub	SSCP of ITS1, cloning & sequencing	9	2004	3	2005	Jones 2008 ProcRSocB Community change in the endosymbionts of a coral after a bleaching event	ITS1 primers: symITSFP and SymITSRP, novel SSCP profiles were cloned and sequenced		symITSFP and SymITSRP
1785	Acropora millepora	ITS2	Cladocopium C3	C3		Miall Island	Central Indo-Pacific	Northeast Australian Shelf	Central and Southern GBR	0	3	-23.15	150.9	Direct from Pub	Direct from Pub	SSCP of ITS1, cloning & sequencing	9	2004	3	2005	Jones 2008 ProcRSocB Community change in the endosymbionts of a coral after a bleaching event	ITS1 primers: symITSFP and SymITSRP, novel SSCP profiles were cloned and sequenced		symITSFP and SymITSRP
1786	Acropora millepora	ITS2	Cladocopium C3	C3		Miall Island	Central Indo-Pacific	Northeast Australian Shelf	Central and Southern GBR	0	3	-23.15	150.9	Direct from Pub	Direct from Pub	SSCP of ITS1, cloning & sequencing	9	2004	3	2005	Jones 2008 ProcRSocB Community change in the endosymbionts of a coral after a bleaching event	ITS1 primers: symITSFP and SymITSRP, novel SSCP profiles were cloned and sequenced		symITSFP and SymITSRP
1787	Acropora millepora	ITS2	Cladocopium C3	C3		Miall Island	Central Indo-Pacific	Northeast Australian Shelf	Central and Southern GBR	0	3	-23.15	150.9	Direct from Pub	Direct from Pub	SSCP of ITS1, cloning & sequencing	9	2004	3	2005	Jones 2008 ProcRSocB Community change in the endosymbionts of a coral after a bleaching event	ITS1 primers: symITSFP and SymITSRP, novel SSCP profiles were cloned and sequenced		symITSFP and SymITSRP
1788	Acropora millepora	ITS2	Cladocopium C3	C3		Miall Island	Central Indo-Pacific	Northeast Australian Shelf	Central and Southern GBR	0	3	-23.15	150.9	Direct from Pub	Direct from Pub	SSCP of ITS1, cloning & sequencing	9	2004	3	2005	Jones 2008 ProcRSocB Community change in the endosymbionts of a coral after a bleaching event	ITS1 primers: symITSFP and SymITSRP, novel SSCP profiles were cloned and sequenced		symITSFP and SymITSRP
1789	Acropora millepora	ITS2	Cladocopium C3	C3		Miall Island	Central Indo-Pacific	Northeast Australian Shelf	Central and Southern GBR	0	3	-23.15	150.9	Direct from Pub	Direct from Pub	SSCP of ITS1, cloning & sequencing	9	2004	3	2005	Jones 2008 ProcRSocB Community change in the endosymbionts of a coral after a bleaching event	ITS1 primers: symITSFP and SymITSRP, novel SSCP profiles were cloned and sequenced		symITSFP and SymITSRP
1790	Acropora millepora	ITS2	Cladocopium C3	C3		Miall Island	Central Indo-Pacific	Northeast Australian Shelf	Central and Southern GBR	0	3	-23.15	150.9	Direct from Pub	Direct from Pub	SSCP of ITS1, cloning & sequencing	9	2004	3	2005	Jones 2008 ProcRSocB Community change in the endosymbionts of a coral after a bleaching event	ITS1 primers: symITSFP and SymITSRP, novel SSCP profiles were cloned and sequenced		symITSFP and SymITSRP
1791	Acropora millepora	ITS2	Cladocopium C3	C3		Miall Island	Central Indo-Pacific	Northeast Australian Shelf	Central and Southern GBR	0	3	-23.15	150.9	Direct from Pub	Direct from Pub	SSCP of ITS1, cloning & sequencing	9	2004	3	2005	Jones 2008 ProcRSocB Community change in the endosymbionts of a coral after a bleaching event	ITS1 primers: symITSFP and SymITSRP, novel SSCP profiles were cloned and sequenced		symITSFP and SymITSRP
1792	Acropora millepora	ITS2	Cladocopium C3	C3		Miall Island	Central Indo-Pacific	Northeast Australian Shelf	Central and Southern GBR	0	3	-23.15	150.9	Direct from Pub	Direct from Pub	SSCP of ITS1, cloning & sequencing	9	2004	3	2005	Jones 2008 ProcRSocB Community change in the endosymbionts of a coral after a bleaching event	ITS1 primers: symITSFP and SymITSRP, novel SSCP profiles were cloned and sequenced		symITSFP and SymITSRP
1793	Acropora millepora	ITS2	Cladocopium C3	C3		Miall Island	Central Indo-Pacific	Northeast Australian Shelf	Central and Southern GBR	0	3	-23.15	150.9	Direct from Pub	Direct from Pub	SSCP of ITS1, cloning & sequencing	9	2004	3	2005	Jones 2008 ProcRSocB Community change in the endosymbionts of a coral after a bleaching event	ITS1 primers: symITSFP and SymITSRP, novel SSCP profiles were cloned and sequenced		symITSFP and SymITSRP
1794	Acropora millepora	ITS2	Cladocopium C3	C3		Miall Island	Central Indo-Pacific	Northeast Australian Shelf	Central and Southern GBR	0	3	-23.15	150.9	Direct from Pub	Direct from Pub	SSCP of ITS1, cloning & sequencing	9	2004	3	2005	Jones 2008 ProcRSocB Community change in the endosymbionts of a coral after a bleaching event	ITS1 primers: symITSFP and SymITSRP, novel SSCP profiles were cloned and sequenced		symITSFP and SymITSRP
1795	Acropora millepora	ITS2	Cladocopium C3	C3		Miall Island	Central Indo-Pacific	Northeast Australian Shelf	Central and Southern GBR	0	3	-23.15	150.9	Direct from Pub	Direct from Pub	SSCP of ITS1, cloning & sequencing	9	2004	3	2005	Jones 2008 ProcRSocB Community change in the endosymbionts of a coral after a bleaching event	ITS1 primers: symITSFP and SymITSRP, novel SSCP profiles were cloned and sequenced		symITSFP and SymITSRP
1796	Acropora millepora	ITS2	Cladocopium C3	C3		Miall Island	Central Indo-Pacific	Northeast Australian Shelf	Central and Southern GBR	0	3	-23.15	150.9	Direct from Pub	Direct from Pub	SSCP of ITS1, cloning & sequencing	9	2004	3	2005	Jones 2008 ProcRSocB Community change in the endosymbionts of a coral after a bleaching event	ITS1 primers: symITSFP and SymITSRP, novel SSCP profiles were cloned and sequenced		symITSFP and SymITSRP
1797	Acropora millepora	ITS2	Cladocopium C3	C3		Miall Island	Central Indo-Pacific	Northeast Australian Shelf	Central and Southern GBR	0	3	-23.15	150.9	Direct from Pub	Direct from Pub	SSCP of ITS1, cloning & sequencing	9	2004	3	2005	Jones 2008 ProcRSocB Community change in the endosymbionts of a coral after a bleaching event	ITS1 primers: symITSFP and SymITSRP, novel SSCP profiles were cloned and sequenced		symITSFP and SymITSRP
1798	Acropora millepora	ITS2	Cladocopium C3	C3		Miall Island	Central Indo-Pacific	Northeast Australian Shelf	Central and Southern GBR	0	3	-23.15	150.9	Direct from Pub	Direct from Pub	SSCP of ITS1, cloning & sequencing	9	2004	3	2005	Jones 2008 ProcRSocB Community change in the endosymbionts of a coral after a bleaching event	ITS1 primers: symITSFP and SymITSRP, novel SSCP profiles were cloned and sequenced		symITSFP and SymITSRP
1799	Acropora millepora	ITS2	Cladocopium C3	C3		Miall Island	Central Indo-Pacific	Northeast Australian Shelf	Central and Southern GBR	0	3	-23.15	150.9	Direct from Pub	Direct from Pub	SSCP of ITS1, cloning & sequencing	9	2004	3	2005	Jones 2008 ProcRSocB Community change in the endosymbionts of a coral after a bleaching event	ITS1 primers: symITSFP and SymITSRP, novel SSCP profiles were cloned and sequenced		symITSFP and SymITSRP
1800	Acropora millepora	ITS2	Cladocopium C3	C3		Miall Island	Central Indo-Pacific	Northeast Australian Shelf	Central and Southern GBR	0	3	-23.15	150.9	Direct from Pub	Direct from Pub	SSCP of ITS1, cloning & sequencing	9	2004	3	2005	Jones 2008 ProcRSocB Community change in the endosymbionts of a coral after a bleaching event	ITS1 primers: symITSFP and SymITSRP, novel SSCP profiles were cloned and sequenced		symITSFP and SymITSRP
1801	Acropora millepora	ITS2	Cladocopium C3	C3		Miall Island	Central Indo-Pacific	Northeast Australian Shelf	Central and Southern GBR	0	3	-23.15	150.9	Direct from Pub	Direct from Pub	SSCP of ITS1, cloning & sequencing	9	2004	3	2005	Jones 2008 ProcRSocB Community change in the endosymbionts of a coral after a bleaching event	ITS1 primers: symITSFP and SymITSRP, novel SSCP profiles were cloned and sequenced		symITSFP and SymITSRP
1802	Acropora millepora	ITS2	Cladocopium C3	C3		Miall Island	Central Indo-Pacific	Northeast Australian Shelf	Central and Southern GBR	0	3	-23.15	150.9	Direct from Pub	Direct from Pub	SSCP of ITS1, cloning & sequencing	9	2004	3	2005	Jones 2008 ProcRSocB Community change in the endosymbionts of a coral after a bleaching event	ITS1 primers: symITSFP and SymITSRP, novel SSCP profiles were cloned and sequenced		symITSFP and SymITSRP
1803	Acropora millepora	ITS2	Cladocopium C3	C3		Miall Island	Central Indo-Pacific	Northeast Australian Shelf	Central and Southern GBR	0	3	-23.15	150.9	Direct from Pub	Direct from Pub	SSCP of ITS1, cloning & sequencing	9	2004	3	2005	Jones 2008 ProcRSocB Community change in the endosymbionts of a coral after a bleaching event	ITS1 primers: symITSFP and SymITSRP, novel SSCP profiles were cloned and sequenced		symITSFP and SymITSRP
1804	Acropora millepora	ITS2	Cladocopium C3	C3		Miall Island	Central Indo-Pacific	Northeast Australian Shelf	Central and Southern GBR	0	3	-23.15	150.9	Direct from Pub	Direct from Pub	SSCP of ITS1, cloning & sequencing	9	2004	3	2005	Jones 2008 ProcRSocB Community change in the endosymbionts of a coral after a bleaching event	ITS1 primers: symITSFP and SymITSRP, novel SSCP profiles were cloned and sequenced		symITSFP and SymITSRP
1805	Acropora millepora	ITS2	Cladocopium C3	C3		Miall Island	Central Indo-Pacific	Northeast Australian Shelf	Central and Southern GBR	0	3	-23.15	150.9	Direct from Pub	Direct from Pub	SSCP of ITS1, cloning & sequencing	9	2004	3	2005	Jones 2008 ProcRSocB Community change in the endosymbionts of a coral after a bleaching event	ITS1 primers: symITSFP and SymITSRP, novel SSCP profiles were cloned and sequenced		symITSFP and SymITSRP
1806	Acropora millepora	ITS2	Cladocopium C3	C3		Miall Island	Central Indo-Pacific	Northeast Australian Shelf	Central and Southern GBR	0	3	-23.15	150.9	Direct from Pub	Direct from Pub	SSCP of ITS1, cloning & sequencing	9	2004	3	2005	Jones 2008 ProcRSocB Community change in the endosymbionts of a coral after a bleaching event	ITS1 primers: symITSFP and SymITSRP, novel SSCP profiles were cloned and sequenced		symITSFP and SymITSRP
1807	Acropora millepora	ITS2	Cladocopium C3	C3		Miall Island	Central Indo-Pacific	Northeast Australian Shelf	Central and Southern GBR	0	3	-23.15	150.9	Direct from Pub	Direct from Pub	SSCP of ITS1, cloning & sequencing	9	2004	3	2005	Jones 2008 ProcRSocB Community change in the endosymbionts of a coral after a bleaching event	ITS1 primers: symITSFP and SymITSRP, novel SSCP profiles were cloned and sequenced		symITSFP and SymITSRP
1808	Acropora millepora	ITS2	Cladocopium C3	C3		Miall Island	Central Indo-Pacific	Northeast Australian Shelf	Central and Southern GBR	0	3	-23.15	150.9	Direct from Pub	Direct from Pub	SSCP of ITS1, cloning & sequencing	9	2004	3	2005	Jones 2008 ProcRSocB Community change in the endosymbionts of a coral after a bleaching event	ITS1 primers: symITSFP and SymITSRP, novel SSCP profiles were cloned and sequenced		symITSFP and SymITSRP
1809	Acropora millepora	ITS2	Cladocopium C3	C3		Miall Island	Central Indo-Pacific	Northeast Australian Shelf	Central and Southern GBR	0	3	-23.15	150.9	Direct from Pub	Direct from Pub	SSCP of ITS1, cloning & sequencing	9	2004	3	2005	Jones 2008 ProcRSocB Community change in the endosymbionts of a coral after a bleaching event	ITS1 primers: symITSFP and SymITSRP, novel SSCP profiles were cloned and sequenced		symITSFP and SymITSRP
1810	Acropora millepora	ITS2	Cladocopium C3	C3		Miall Island	Central Indo-Pacific	Northeast Australian Shelf	Central and Southern GBR	0	3	-23.15	150.9	Direct from Pub	Direct from Pub	SSCP of ITS1, cloning & sequencing	9	2004	3	2005	Jones 2008 ProcRSocB Community change in the endosymbionts of a coral after a bleaching event	ITS1 primers: symITSFP and SymITSRP, novel SSCP profiles were cloned and sequenced		symITSFP and SymITSRP
1811	Acropora millepora	ITS2	Cladocopium C3	C3		Miall Island	Central Indo-Pacific	Northeast Australian Shelf	Central and Southern GBR	0	3	-23.15	150.9	Direct from Pub	Direct from Pub	SSCP of ITS1, cloning & sequencing	9	2004	3	2005	Jones 2008 ProcRSocB Community change in the endosymbionts of a coral after a bleaching event	ITS1 primers: symITSFP and SymITSRP, novel SSCP profiles were cloned and sequenced		symITSFP and SymITSRP
1812	Acropora millepora	ITS2	Cladocopium C3	C3		Miall Island	Central Indo-Pacific	Northeast Australian Shelf	Central and Southern GBR	0	3	-23.15	150.9	Direct from Pub	Direct from Pub	SSCP of ITS1, cloning & sequencing	9	2004	3	2005	Jones 2008 ProcRSocB Community change in the endosymbionts of a coral after a bleaching event	ITS1 primers: symITSFP and SymITSRP, novel SSCP profiles were cloned and sequenced		symITSFP and SymITSRP
1813	Acropora millepora	ITS2	Cladocopium C3	C3		Miall Island	Central Indo-Pacific	Northeast Australian Shelf	Central and Southern GBR	0	3	-23.15	150.9	Direct from Pub	Direct from Pub	SSCP of ITS1, cloning & sequencing	9	2004	3	2005	Jones 2008 ProcRSocB Community change in the endosymbionts of a coral after a bleaching event	ITS1 primers: symITSFP and SymITSRP, novel SSCP profiles were cloned and sequenced		symITSFP and SymITSRP
1814	Acropora millepora	ITS2	Cladocopium C3	C3		Miall Island	Central Indo-Pacific	Northeast Australian Shelf	Central and Southern GBR	0	3	-23.15	150.9	Direct from Pub	Direct from Pub	SSCP of ITS1, cloning & sequencing	9	2004	3	2005	Jones 2008 ProcRSocB Community change in the endosymbionts of a coral after a bleaching event	ITS1 primers: symITSFP and SymITSRP, novel SSCP profiles were cloned and sequenced		symITSFP and SymITSRP
1815	Acropora millepora	ITS2	Cladocopium C3	C3		Miall Island	Central Indo-Pacific	Northeast Australian Shelf	Central and Southern GBR	0	3	-23.15	150.9	Direct from Pub	Direct from Pub	SSCP of ITS1, cloning & sequencing	9	2004	3	2005	Jones 2008 ProcRSocB Community change in the endosymbionts of a coral after a bleaching event	ITS1 primers: symITSFP and SymITSRP, novel SSCP profiles were cloned and sequenced		symITSFP and SymITSRP
1816	Acropora millepora	ITS2	Cladocopium C3	C3		Miall Island	Central Indo-Pacific	Northeast Australian Shelf	Central and Southern GBR	0	3	-23.15	150.9	Direct from Pub	Direct from Pub	SSCP of ITS1, cloning & sequencing	9	2004	3	2005	Jones 2008 ProcRSocB Community change in the endosymbionts of a coral after a bleaching event	ITS1 primers: symITSFP and SymITSRP, novel SSCP profiles were cloned and sequenced		symITSFP and SymITSRP
1817	Acropora millepora	ITS2	Cladocopium C3	C3		Miall Island	Central Indo-Pacific	Northeast Australian Shelf	Central and Southern GBR	0	3	-23.15	150.9	Direct from Pub	Direct from Pub	SSCP of ITS1, cloning & sequencing	9	2004	3	2005	Jones 2008 ProcRSocB Community change in the endosymbionts of a coral after a bleaching event	ITS1 primers: symITSFP and SymITSRP, novel SSCP profiles were cloned and sequenced		symITSFP and SymITSRP
1818	Acropora millepora	ITS2	Cladocopium C3	C3		Miall Island	Central Indo-Pacific	Northeast Australian Shelf	Central and Southern GBR	0	3	-23.15	150.9	Direct from Pub	Direct from Pub	SSCP of ITS1, cloning & sequencing	9	2004	3	2005	Jones 2008 ProcRSocB Community change in the endosymbionts of a coral after a bleaching event	ITS1 primers: symITSFP and SymITSRP, novel SSCP profiles were cloned and sequenced		symITSFP and SymITSRP
1819	Acropora millepora	ITS2	Cladocopium C3	C3		Miall Island	Central Indo-Pacific	Northeast Australian Shelf	Central and Southern GBR	0	3	-23.15	150.9	Direct from Pub	Direct from Pub	SSCP of ITS1, cloning & sequencing	9	2004	3	2005	Jones 2008 ProcRSocB Community change in the endosymbionts of a coral after a bleaching event	ITS1 primers: symITSFP and SymITSRP, novel SSCP profiles were cloned and sequenced		symITSFP and SymITSRP
1820	Acropora millepora	ITS2	Cladocopium C3	C3		Miall Island	Central Indo-Pacific	Northeast Australian Shelf	Central and Southern GBR	0	3	-23.15	150.9	Direct from Pub	Direct from Pub	SSCP of ITS1, cloning & sequencing	9	2004	3	2005	Jones 2008 ProcRSocB Community change in the endosymbionts of a coral after a bleaching event	ITS1 primers: symITSFP and SymITSRP, novel SSCP profiles were cloned and sequenced		symITSFP and SymITSRP
1821	Acropora millepora	ITS2	Cladocopium C3	C3		Miall Island	Central Indo-Pacific	Northeast Australian Shelf	Central and Southern GBR	0	3	-23.15	150.9	Direct from Pub	Direct from Pub	SSCP of ITS1, cloning & sequencing	9	2004	3	2005	Jones 2008 ProcRSocB Community change in the endosymbionts of a coral after a bleaching event	ITS1 primers: symITSFP and SymITSRP, novel SSCP profiles were cloned and sequenced		symITSFP and SymITSRP
1822	Acropora millepora	ITS2	Cladocopium C3	C3		Miall Island	Central Indo-Pacific	Northeast Australian Shelf	Central and Southern GBR	0	3	-23.15	150.9	Direct from Pub	Direct from Pub	SSCP of ITS1, cloning & sequencing	9	2004	3	2005	Jones 2008 ProcRSocB Community change in the endosymbionts of a coral after a bleaching event	ITS1 primers: symITSFP and SymITSRP, novel SSCP profiles were cloned and sequenced		symITSFP and SymITSRP
1823	Acropora millepora	ITS2	Cladocopium C3	C3		Miall Island	Central Indo-Pacific	Northeast Australian Shelf	Central and Southern GBR	0	3	-23.15	150.9	Direct from Pub	Direct from Pub	SSCP of ITS1, cloning & sequencing	9	2004	3	2005	Jones 2008 ProcRSocB Community change in the endosymbionts of a coral after a bleaching event	ITS1 primers: symITSFP and SymITSRP, novel SSCP profiles were cloned and sequenced		symITSFP and SymITSRP
1824	Acropora millepora	ITS2	Cladocopium C3	C3		Miall Island	Central Indo-Pacific	Northeast Australian Shelf	Central and Southern GBR	0	3	-23.15	150.9	Direct from Pub	Direct from Pub	SSCP of ITS1, cloning & sequencing	9	2004	3	2005	Jones 2008 ProcRSocB Community change in the endosymbionts of a coral after a bleaching event	ITS1 primers: symITSFP and SymITSRP, novel SSCP profiles were cloned and sequenced		symITSFP and SymITSRP
1825	Acropora millepora	ITS2	Cladocopium C3	C3		Miall Island	Central Indo-Pacific	Northeast Australian Shelf	Central and Southern GBR	0	3	-23.15	150.9	Direct from Pub	Direct from Pub	SSCP of ITS1, cloning & sequencing	9	2004	3	2005	Jones 2008 ProcRSocB Community change in the endosymbionts of a coral after a bleaching event	ITS1 primers: symITSFP and SymITSRP, novel SSCP profiles were cloned and sequenced		symITSFP and SymITSRP
1826	Acropora millepora	ITS2	Cladocopium C3	C3		Miall Island	Central Indo-Pacific	Northeast Australian Shelf	Central and Southern GBR	0	3	-23.15	150.9	Direct from Pub	Direct from Pub	SSCP of ITS1, cloning & sequencing	9	2004	3	2005	Jones 2008 ProcRSocB Community change in the endosymbionts of a coral after a bleaching event	ITS1 primers: symITSFP and SymITSRP, novel SSCP profiles were cloned and sequenced		symITSFP and SymITSRP
1827	Acropora millepora	ITS2	Cladocopium C3	C3		Miall Island	Central Indo-Pacific	Northeast Australian Shelf	Central and Southern GBR	0	3	-23.15	150.9	Direct from Pub	Direct from Pub	SSCP of ITS1, cloning & sequencing	9	2004	3	2005	Jones 2008 ProcRSocB Community change in the endosymbionts of a coral after a bleaching event	ITS1 primers: symITSFP and SymITSRP, novel SSCP profiles were cloned and sequenced		symITSFP and SymITSRP
1828	Acropora millepora	ITS2	Cladocopium C3	C3		Miall Island	Central Indo-Pacific	Northeast Australian Shelf	Central and Southern GBR	0	3	-23.15	150.9	Direct from Pub	Direct from Pub	SSCP of ITS1, cloning & sequencing	9	2004	3	2005	Jones 2008 ProcRSocB Community change in the endosymbionts of a coral after a bleaching event	ITS1 primers: symITSFP and SymITSRP, novel SSCP profiles were cloned and sequenced		symITSFP and SymITSRP
1829	Acropora millepora	ITS2	Cladocopium C3	C3		Miall Island	Central Indo-Pacific	Northeast Australian Shelf	Central and Southern GBR	0	3	-23.15	150.9	Direct from Pub	Direct from Pub	SSCP of ITS1, cloning & sequencing	9	2004	3	2005	Jones 2008 ProcRSocB Community change in the endosymbionts of a coral after a bleaching event	ITS1 primers: symITSFP and SymITSRP, novel SSCP profiles were cloned and sequenced		symITSFP and SymITSRP
1830	Acropora millepora	ITS2	Cladocopium C3	C3		Miall Island	Central Indo-Pacific	Northeast Australian Shelf	Central and Southern GBR	0	3	-23.15	150.9	Direct from Pub	Direct from Pub	SSCP of ITS1, cloning & sequencing	9	2004	3	2005	Jones 2008 ProcRSocB Community change in the endosymbionts of a coral after a bleaching event	ITS1 primers: symITSFP and SymITSRP, novel SSCP profiles were cloned and sequenced		symITSFP and SymITSRP
1831	Acropora millepora	ITS2	Cladocopium C3	C3		Miall Island	Central Indo-Pacific	Northeast Australian Shelf	Central and Southern GBR	0	3	-23.15	150.9	Direct from Pub	Direct from Pub	SSCP of ITS1, cloning & sequencing	9	2004	3	2005	Jones 2008 ProcRSocB Community change in the endosymbionts of a coral after a bleaching event	ITS1 primers: symITSFP and SymITSRP, novel SSCP profiles were cloned and sequenced		symITSFP and SymITSRP
1832	Acropora millepora	ITS2	Cladocopium C3	C3		Miall Island	Central Indo-Pacific	Northeast Australian Shelf	Central and Southern GBR	0	3	-23.15	150.9	Direct from Pub	Direct from Pub	SSCP of ITS1, cloning & sequencing	9	2004	3	2005	Jones 2008 ProcRSocB Community change in the endosymbionts of a coral after a bleaching event	ITS1 primers: symITSFP and SymITSRP, novel SSCP profiles were cloned and sequenced		symITSFP and SymITSRP
1833	Acropora millepora	ITS2	Cladocopium C3	C3		Miall Island	Central Indo-Pacific	Northeast Australian Shelf	Central and Southern GBR	0	3	-23.15	150.9	Direct from Pub	Direct from Pub	SSCP of ITS1, cloning & sequencing	9	2004	3	2005	Jones 2008 ProcRSocB Community change in the endosymbionts of a coral after a bleaching event	ITS1 primers: symITSFP and SymITSRP, novel SSCP profiles were cloned and sequenced		symITSFP and SymITSRP
1834	Acropora millepora	ITS2	Cladocopium C3	C3		Miall Island	Central Indo-Pacific	Northeast Australian Shelf	Central and Southern GBR	0	3	-23.15	150.9	Direct from Pub	Direct from Pub	SSCP of ITS1, cloning & sequencing	9	2004	3	2005	Jones 2008 ProcRSocB Community change in the endosymbionts of a coral after a bleaching event	ITS1 primers: symITSFP and SymITSRP, novel SSCP profiles were cloned and sequenced		symITSFP and SymITSRP
1835	Acropora millepora	ITS2	Cladocopium C3	C3		Miall Island	Central Indo-Pacific	Northeast Australian Shelf	Central and Southern GBR	0	3	-23.15	150.9	Direct from Pub	Direct from Pub	SSCP of ITS1, cloning & sequencing	9	2004	3	2005	Jones 2008 ProcRSocB Community change in the endosymbionts of a coral after a bleaching event	ITS1 primers: symITSFP and SymITSRP, novel SSCP profiles were cloned and sequenced		symITSFP and SymITSRP
1836	Acropora millepora	ITS2	Cladocopium C3	C3		Miall Island	Central Indo-Pacific	Northeast Australian Shelf	Central and Southern GBR	0	3	-23.15	150.9	Direct from Pub	Direct from Pub	SSCP of ITS1, cloning & sequencing	9	2004	3	2005	Jones 2008 ProcRSocB Community change in the endosymbionts of a coral after a bleaching event	ITS1 primers: symITSFP and SymITSRP, novel SSCP profiles were cloned and sequenced		symITSFP and SymITSRP
1837	Acropora millepora	ITS2	Cladocopium C3	C3		Miall Island	Central Indo-Pacific	Northeast Australian Shelf	Central and Southern GBR	0	3	-23.15	150.9	Direct from Pub	Direct from Pub	SSCP of ITS1, cloning & sequencing	9	2004	3	2005	Jones 2008 ProcRSocB Community change in the endosymbionts of a coral after a bleaching event	ITS1 primers: symITSFP and SymITSRP, novel SSCP profiles were cloned and sequenced		symITSFP and SymITSRP
1838	Acropora millepora	ITS2	Cladocopium C3	C3		Miall Island	Central Indo-Pacific	Northeast Australian Shelf	Central and Southern GBR	0	3	-23.15	150.9	Direct from Pub	Direct from Pub	SSCP of ITS1, cloning & sequencing	9	2004	3	2005	Jones 2008 ProcRSocB Community change in the endosymbionts of a coral after a bleaching event	ITS1 primers: symITSFP and SymITSRP, novel SSCP profiles were cloned and sequenced		symITSFP and SymITSRP
1839	Acropora millepora	ITS2	Cladocopium C3	C3		Miall Island	Central Indo-Pacific	Northeast Australian Shelf	Central and Southern GBR	0	3	-23.15	150.9	Direct from Pub	Direct from Pub	SSCP of ITS1, cloning & sequencing	9	2004	3	2005	Jones 2008 ProcRSocB Community change in the endosymbionts of a coral after a bleaching event	ITS1 primers: symITSFP and SymITSRP, novel SSCP profiles were cloned and sequenced		symITSFP and SymITSRP
1840	Acropora millepora	ITS2	Cladocopium C3	C3		Miall Island	Central Indo-Pacific	Northeast Australian Shelf	Central and Southern GBR	0	3	-23.15	150.9	Direct from Pub	Direct from Pub	SSCP of ITS1, cloning & sequencing	9	2004	3	2005	Jones 2008 ProcRSocB Community change in the endosymbionts of a coral after a bleaching event	ITS1 primers: symITSFP and SymITSRP, novel SSCP profiles were cloned and sequenced		symITSFP and SymITSRP
1841	Acropora millepora	ITS2	Cladocopium C3	C3		Miall Island	Central Indo-Pacific	Northeast Australian Shelf	Central and Southern GBR	0	3	-23.15	150.9	Direct from Pub	Direct from Pub	SSCP of ITS1, cloning & sequencing	9	2004	3	2005	Jones 2008 ProcRSocB Community change in the endosymbionts of a coral after a bleaching event	ITS1 primers: symITSFP and SymITSRP, novel SSCP profiles were cloned and sequenced		symITSFP and SymITSRP
1842	Acropora millepora	ITS2	Cladocopium C3	C3		Miall Island	Central Indo-Pacific	Northeast Australian Shelf	Central and Southern GBR	0	3	-23.15	150.9	Direct from Pub	Direct from Pub	SSCP of ITS1, cloning & sequencing	9	2004	3	2005	Jones 2008 ProcRSocB Community change in the endosymbionts of a coral after a bleaching event	ITS1 primers: symITSFP and SymITSRP, novel SSCP profiles were cloned and sequenced		symITSFP and SymITSRP
1843	Acropora millepora	ITS2	Cladocopium C3	C3		Miall Island	Central Indo-Pacific	Northeast Australian Shelf	Central and Southern GBR	0	3	-23.15	150.9	Direct from Pub	Direct from Pub	SSCP of ITS1, cloning & sequencing	9	2004	3	2005	Jones 2008 ProcRSocB Community change in the endosymbionts of a coral after a bleaching event	ITS1 primers: symITSFP and SymITSRP, novel SSCP profiles were cloned and sequenced		symITSFP and SymITSRP
1844	Acropora millepora	ITS2	Cladocopium C3	C3		Miall Island	Central Indo-Pacific	Northeast Australian Shelf	Central and Southern GBR	0	3	-23.15	150.9	Direct from Pub	Direct from Pub	SSCP of ITS1, cloning & sequencing	9	2004	3	2005	Jones 2008 ProcRSocB Community change in the endosymbionts of a coral after a bleaching event	ITS1 primers: symITSFP and SymITSRP, novel SSCP profiles were cloned and sequenced		symITSFP and SymITSRP
1845	Acropora millepora	ITS2	Cladocopium C3	C3		Miall Island	Central Indo-Pacific	Northeast Australian Shelf	Central and Southern GBR	0	3	-23.15	150.9	Direct from Pub	Direct from Pub	SSCP of ITS1, cloning & sequencing	9	2004	3	2005	Jones 2008 ProcRSocB Community change in the endosymbionts of a coral after a bleaching event	ITS1 primers: symITSFP and SymITSRP, novel SSCP profiles were cloned and sequenced		symITSFP and SymITSRP
1846	Acropora millepora	ITS2	Cladocopium C3	C3		Miall Island	Central Indo-Pacific	Northeast Australian Shelf	Central and Southern GBR	0	3	-23.15	150.9	Direct from Pub	Direct from Pub	SSCP of ITS1, cloning & sequencing	9	2004	3	2005	Jones 2008 ProcRSocB Community change in the endosymbionts of a coral after a bleaching event	ITS1 primers: symITSFP and SymITSRP, novel SSCP profiles were cloned and sequenced		symITSFP and SymITSRP
1847	Acropora millepora	ITS2	Cladocopium C3	C3		Miall Island	Central Indo-Pacific	Northeast Australian Shelf	Central and Southern GBR	0	3	-23.15	150.9	Direct from Pub	Direct from Pub	SSCP of ITS1, cloning & sequencing	9	2004	3	2005	Jones 2008 ProcRSocB Community change in the endosymbionts of a coral after a bleaching event	ITS1 primers: symITSFP and SymITSRP, novel SSCP profiles were cloned and sequenced		symITSFP and SymITSRP
1848	Acropora millepora	ITS2	Cladocopium C3	C3		Miall Island	Central Indo-Pacific	Northeast Australian Shelf	Central and Southern GBR	0	3	-23.15	150.9	Direct from Pub	Direct from Pub	SSCP of ITS1, cloning & sequencing	9	2004	3	2005	Jones 2008 ProcRSocB Community change in the endosymbionts of a coral after a bleaching event	ITS1 primers: symITSFP and SymITSRP, novel SSCP profiles were cloned and sequenced		symITSFP and SymITSRP
1849	Acropora millepora	ITS2	Cladocopium C3	C3		Miall Island	Central Indo-Pacific	Northeast Australian Shelf	Central and Southern GBR	0	3	-23.15	150.9	Direct from Pub	Direct from Pub	SSCP of ITS1, cloning & sequencing	9	2004	3	2005	Jones 2008 ProcRSocB Community change in the endosymbionts of a coral after a bleaching event	ITS1 primers: symITSFP and SymITSRP, novel SSCP profiles were cloned and sequenced		symITSFP and SymITSRP
1850	Acropora millepora	ITS2	Cladocopium C3	C3		Miall Island	Central Indo-Pacific	Northeast Australian Shelf	Central and Southern GBR	0	3	-23.15	150.9	Direct from Pub	Direct from Pub	SSCP of ITS1, cloning & sequencing	9	2004	3	2005	Jones 2008 ProcRSocB Community change in the endosymbionts of a coral after a bleaching event	ITS1 primers: symITSFP and SymITSRP, novel SSCP profiles were cloned and sequenced		symITSFP and SymITSRP
1851	Acropora millepora	ITS2	Cladocopium C3	C3		Miall Island	Central Indo-Pacific	Northeast Australian Shelf	Central and Southern GBR	0	3	-23.15	150.9	Direct from Pub	Direct from Pub	SSCP of ITS1, cloning & sequencing	9	2004	3	2005	Jones 2008 ProcRSocB Community change in the endosymbionts of a coral after a bleaching event	ITS1 primers: symITSFP and SymITSRP, novel SSCP profiles were cloned and sequenced		symITSFP and SymITSRP
1852	Acropora millepora	ITS2	Cladocopium C3	C3		Miall Island	Central Indo-Pacific	Northeast Australian Shelf	Central and Southern GBR	0	3	-23.15	150.9	Direct from Pub	Direct from Pub	SSCP of ITS1, cloning & sequencing	9	2004	3	2005	Jones 2008 ProcRSocB Community change in the endosymbionts of a coral after a bleaching event	ITS1 primers: symITSFP and SymITSRP, novel SSCP profiles were cloned and sequenced		symITSFP and SymITSRP
1853	Acropora millepora	ITS2	Cladocopium C3	C3		Miall Island	Central Indo-Pacific	Northeast Australian Shelf	Central and Southern GBR	0	3	-23.15	150.9	Direct from Pub	Direct from Pub	SSCP of ITS1, cloning & sequencing	9	2004	3	2005	Jones 2008 ProcRSocB Community change in the endosymbionts of a coral after a bleaching event	ITS1 primers: symITSFP and SymITSRP, novel SSCP profiles were cloned and sequenced		symITSFP and SymITSRP
1854	Acropora millepora	ITS2	Cladocopium C3	C3		Miall Island	Central Indo-Pacific	Northeast Australian Shelf	Central and Southern GBR	0	3	-23.15	150.9	Direct from Pub	Direct from Pub	SSCP of ITS1, cloning & sequencing	9	2004	3	2005	Jones 2008 ProcRSocB Community change in the endosymbionts of a coral after a bleaching event	ITS1 primers: symITSFP and SymITSRP, novel SSCP profiles were cloned and sequenced		symITSFP and SymITSRP
1855	Acropora millepora	ITS2	Cladocopium C3	C3		Miall Island	Central Indo-Pacific	Northeast Australian Shelf	Central and Southern GBR	0	3	-23.15	150.9	Direct from Pub	Direct from Pub	SSCP of ITS1, cloning & sequencing	9	2004	3	2005	Jones 2008 ProcRSocB Community change in the endosymbionts of a coral after a bleaching event	ITS1 primers: symITSFP and SymITSRP, novel SSCP profiles were cloned and sequenced		symITSFP and SymITSRP
1856	Acropora millepora	ITS2	Cladocopium C3	C3		Miall Island	Central Indo-Pacific	Northeast Australian Shelf	Central and Southern GBR	0	3	-23.15	150.9	Direct from Pub	Direct from Pub	SSCP of ITS1, cloning & sequencing	9	2004	3	2005	Jones 2008 ProcRSocB Community change in the endosymbionts of a coral after a bleaching event	ITS1 primers: symITSFP and SymITSRP, novel SSCP profiles were cloned and sequenced		symITSFP and SymITSRP
1857	Acropora millepora	ITS2	Cladocopium C3	C3		Miall Island	Central Indo-Pacific	Northeast Australian Shelf	Central and Southern GBR	0	3	-23.15	150.9	Direct from Pub	Direct from Pub	SSCP of ITS1, cloning & sequencing	9	2004	3	2005	Jones 2008 ProcRSocB Community change in the endosymbionts of a coral after a bleaching event	ITS1 primers: symITSFP and SymITSRP, novel SSCP profiles were cloned and sequenced		symITSFP and SymITSRP
1858	Acropora millepora	ITS2	Cladocopium C3	C3		Miall Island	Central Indo-Pacific	Northeast Australian Shelf	Central and Southern GBR	0	3	-23.15	150.9	Direct from Pub	Direct from Pub	SSCP of ITS1, cloning & sequencing	9	2004	3	2005	Jones 2008 ProcRSocB Community change in the endosymbionts of a coral after a bleaching event	ITS1 primers: symITSFP and SymITSRP, novel SSCP profiles were cloned and sequenced		symITSFP and SymITSRP
1859	Acropora millepora	ITS2	Cladocopium C3	C3		Miall Island	Central Indo-Pacific	Northeast Australian Shelf	Central and Southern GBR	0	3	-23.15	150.9	Direct from Pub	Direct from Pub	SSCP of ITS1, cloning & sequencing	9	2004	3	2005	Jones 2008 ProcRSocB Community change in the endosymbionts of a coral after a bleaching event	ITS1 primers: symITSFP and SymITSRP, novel SSCP profiles were cloned and sequenced		symITSFP and SymITSRP
1860	Acropora millepora	ITS2	Cladocopium C3	C3		Miall Island	Central Indo-Pacific	Northeast Australian Shelf	Central and Southern GBR	0	3	-23.15	150.9	Direct from Pub	Direct from Pub	SSCP of ITS1, cloning & sequencing	9	2004	3	2005	Jones 2008 ProcRSocB Community change in the endosymbionts of a coral after a bleaching event	ITS1 primers: symITSFP and SymITSRP, novel SSCP profiles were cloned and sequenced		symITSFP and SymITSRP
1861	Acropora millepora	ITS2	Cladocopium C3	C3		Miall Island	Central Indo-Pacific	Northeast Australian Shelf	Central and Southern GBR	0	3	-23.15	150.9	Direct from Pub	Direct from Pub	SSCP of ITS1, cloning & sequencing	9	2004	3	2005	Jones 2008 ProcRSocB Community change in the endosymbionts of a coral after a bleaching event	ITS1 primers: symITSFP and SymITSRP, novel SSCP profiles were cloned and sequenced		symITSFP and SymITSRP
1862	Acropora millepora	ITS2	Cladocopium C3	C3		Miall Island	Central Indo-Pacific	Northeast Australian Shelf	Central and Southern GBR	0	3	-23.15	150.9	Direct from Pub	Direct from Pub	SSCP of ITS1, cloning & sequencing	9	2004	3	2005	Jones 2008 ProcRSocB Community change in the endosymbionts of a coral after a bleaching event	ITS1 primers: symITSFP and SymITSRP, novel SSCP profiles were cloned and sequenced		symITSFP and SymITSRP
1863	Acropora millepora	ITS2	Cladocopium C3	C3		Miall Island	Central Indo-Pacific	Northeast Australian Shelf	Central and Southern GBR	0	3	-23.15	150.9	Direct from Pub	Direct from Pub	SSCP of ITS1, cloning & sequencing	9	2004	3	2005	Jones 2008 ProcRSocB Community change in the endosymbionts of a coral after a bleaching event	ITS1 primers: symITSFP and SymITSRP, novel SSCP profiles were cloned and sequenced		symITSFP and SymITSRP
1864	Acropora millepora	ITS2	Cladocopium C3	C3		Miall Island	Central Indo-Pacific	Northeast Australian Shelf	Central and Southern GBR	0	3	-23.15	150.9	Direct from Pub	Direct from Pub	SSCP of ITS1, cloning & sequencing	9	2004	3	2005	Jones 2008 ProcRSocB Community change in the endosymbionts of a coral after a bleaching event	ITS1 primers: symITSFP and SymITSRP, novel SSCP profiles were cloned and sequenced		symITSFP and SymITSRP
1865	Acropora millepora	ITS2	Cladocopium C3	C3		Miall Island	Central Indo-Pacific	Northeast Australian Shelf	Central and Southern GBR	0	3	-23.15	150.9	Direct from Pub	Direct from Pub	SSCP of ITS1, cloning & sequencing	9	2004	3	2005	Jones 2008 ProcRSocB Community change in the endosymbionts of a coral after a bleaching event	ITS1 primers: symITSFP and SymITSRP, novel SSCP profiles were cloned and sequenced		symITSFP and SymITSRP
1866	Acropora millepora	ITS2	Cladocopium C3	C3		Miall Island	Central Indo-Pacific	Northeast Australian Shelf	Central and Southern GBR	0	3	-23.15	150.9	Direct from Pub	Direct from Pub	SSCP of ITS1, cloning & sequencing	9	2004	3	2005	Jones 2008 ProcRSocB Community change in the endosymbionts of a coral after a bleaching event	ITS1 primers: symITSFP and SymITSRP, novel SSCP profiles were cloned and sequenced		symITSFP and SymITSRP
1867	Acropora millepora	ITS2	Cladocopium C3	C3		Miall Island	Central Indo-Pacific	Northeast Australian Shelf	Central and Southern GBR	0	3	-23.15	150.9	Direct from Pub	Direct from Pub	SSCP of ITS1, cloning & sequencing	9	2004	3	2005	Jones 2008 ProcRSocB Community change in the endosymbionts of a coral after a bleaching event	ITS1 primers: symITSFP and SymITSRP, novel SSCP profiles were cloned and sequenced		symITSFP and SymITSRP
1868	Acropora millepora	ITS2	Cladocopium C3	C3		Miall Island	Central Indo-Pacific	Northeast Australian Shelf	Central and Southern GBR	0	3	-23.15	150.9	Direct from Pub	Direct from Pub	SSCP of ITS1, cloning & sequencing	9	2004	3	2005	Jones 2008 ProcRSocB Community change in the endosymbionts of a coral after a bleaching event	ITS1 primers: symITSFP and SymITSRP, novel SSCP profiles were cloned and sequenced		symITSFP and SymITSRP
1869	Acropora millepora	ITS2	Cladocopium C3	C3		Miall Island	Central Indo-Pacific	Northeast Australian Shelf	Central and Southern GBR	0	3	-23.15	150.9	Direct from Pub	Direct from Pub	SSCP of ITS1, cloning & sequencing	9	2004	3	2005	Jones 2008 ProcRSocB Community change in the endosymbionts of a coral after a bleaching event	ITS1 primers: symITSFP and SymITSRP, novel SSCP profiles were cloned and sequenced		symITSFP and SymITSRP
1870	Acropora millepora	ITS2	Cladocopium C3	C3		Miall Island	Central Indo-Pacific	Northeast Australian Shelf	Central and Southern GBR	0	3	-23.15	150.9	Direct from Pub	Direct from Pub	SSCP of ITS1, cloning & sequencing	9	2004	3	2005	Jones 2008 ProcRSocB Community change in the endosymbionts of a coral after a bleaching event	ITS1 primers: symITSFP and SymITSRP, novel SSCP profiles were cloned and sequenced		symITSFP and SymITSRP
1871	Acropora millepora	ITS2	Cladocopium C3	C3		Miall Island	Central Indo-Pacific	Northeast Australian Shelf	Central and Southern GBR	0	3	-23.15	150.9	Direct from Pub	Direct from Pub	SSCP of ITS1, cloning & sequencing	9	2004	3	2005	Jones 2008 ProcRSocB Community change in the endosymbionts of a coral after a bleaching event	ITS1 primers: symITSFP and SymITSRP, novel SSCP profiles were cloned and sequenced		symITSFP and SymITSRP
1872	Acropora millepora	ITS2	Cladocopium C3	C3		Miall Island	Central Indo-Pacific	Northeast Australian Shelf	Central and Southern GBR	0	3	-23.15	150.9	Direct from Pub	Direct from Pub	SSCP of ITS1, cloning & sequencing	9	2004	3	2005	Jones 2008 ProcRSocB Community change in the endosymbionts of a coral after a bleaching event	ITS1 primers: symITSFP and SymITSRP, novel SSCP profiles were cloned and sequenced		symITSFP and SymITSRP
1873	Acropora millepora	ITS2	Cladocopium C3	C3		Miall Island	Central Indo-Pacific	Northeast Australian Shelf	Central and Southern GBR	0	3	-23.15	150.9	Direct from Pub	Direct from Pub	SSCP of ITS1, cloning & sequencing	9	2004	3	2005	Jones 2008 ProcRSocB Community change in the endosymbionts of a coral after a bleaching event	ITS1 primers: symITSFP and SymITSRP, novel SSCP profiles were cloned and sequenced		symITSFP and SymITSRP
1874	Acropora millepora	ITS2	Cladocopium C3	C3		Miall Island	Central Indo-Pacific	Northeast Australian Shelf	Central and Southern GBR	0	3	-23.15	150.9	Direct from Pub	Direct from Pub	SSCP of ITS1, cloning & sequencing	9	2004	3	2005	Jones 2008 ProcRSocB Community change in the endosymbionts of a coral after a bleaching event	ITS1 primers: symITSFP and SymITSRP, novel SSCP profiles were cloned and sequenced		symITSFP and SymITSRP
1875	Acropora millepora	ITS2	Cladocopium C3	C3		Miall Island	Central Indo-Pacific	Northeast Australian Shelf	Central and Southern GBR	0	3	-23.15	150.9	Direct from Pub	Direct from Pub	SSCP of ITS1, cloning & sequencing	9	2004	3	2005	Jones 2008 ProcRSocB Community change in the endosymbionts of a coral after a bleaching event	ITS1 primers: symITSFP and SymITSRP, novel SSCP profiles were cloned and sequenced		symITSFP and SymITSRP
1876	Acropora millepora	ITS2	Cladocopium C3	C3		Miall Island	Central Indo-Pacific	Northeast Australian Shelf	Central and Southern GBR	0	3	-23.15	150.9	Direct from Pub	Direct from Pub	SSCP of ITS1, cloning & sequencing	9	2004	3	2005	Jones 2008 ProcRSocB Community change in the endosymbionts of a coral after a bleaching event	ITS1 primers: symITSFP and SymITSRP, novel SSCP profiles were cloned and sequenced		symITSFP and SymITSRP
1877	Acropora millepora	ITS2	Cladocopium C3	C3		Miall Island	Central Indo-Pacific	Northeast Australian Shelf	Central and Southern GBR	0	3	-23.15	150.9	Direct from Pub	Direct from Pub	SSCP of ITS1, cloning & sequencing	9	2004	3	2005	Jones 2008 ProcRSocB Community change in the endosymbionts of a coral after a bleaching event	ITS1 primers: symITSFP and SymITSRP, novel SSCP profiles were cloned and sequenced		symITSFP and SymITSRP
1878	Acropora millepora	ITS2	Cladocopium C3	C3		Miall Island	Central Indo-Pacific	Northeast Australian Shelf	Central and Southern GBR	0	3	-23.15	150.9	Direct from Pub	Direct from Pub	SSCP of ITS1, cloning & sequencing	9	2004	3	2005	Jones 2008 ProcRSocB Community change in the endosymbionts of a coral after a bleaching event	ITS1 primers: symITSFP and SymITSRP, novel SSCP profiles were cloned and sequenced		symITSFP and SymITSRP
1879	Acropora millepora	ITS2	Cladocopium C3	C3		Miall Island	Central Indo-Pacific	Northeast Australian Shelf	Central and Southern GBR	0	3	-23.15	150.9	Direct from Pub	Direct from Pub	SSCP of ITS1, cloning & sequencing	9	2004	3	2005	Jones 2008 ProcRSocB Community change in the endosymbionts of a coral after a bleaching event	ITS1 primers: symITSFP and SymITSRP, novel SSCP profiles were cloned and sequenced		symITSFP and SymITSRP
1880	Acropora millepora	ITS2	Cladocopium C3	C3		Miall Island	Central Indo-Pacific	Northeast Australian Shelf	Central and Southern GBR	0	3	-23.15	150.9	Direct from Pub	Direct from Pub	SSCP of ITS1, cloning & sequencing	9	2004	3	2005	Jones 2008 ProcRSocB Community change in the endosymbionts of a coral after a bleaching event	ITS1 primers: symITSFP and SymITSRP, novel SSCP profiles were cloned and sequenced		symITSFP and SymITSRP
1881	Acropora millepora	ITS2	Cladocopium C3	C3		Miall Island	Central Indo-Pacific	Northeast Australian Shelf	Central and Southern GBR	0	3	-23.15	150.9	Direct from Pub	Direct from Pub	SSCP of ITS1, cloning & sequencing	9	2004	3	2005	Jones 2008 ProcRSocB Community change in the endosymbionts of a coral after a bleaching event	ITS1 primers: symITSFP and SymITSRP, novel SSCP profiles were cloned and sequenced		symITSFP and SymITSRP
1882	Acropora millepora	ITS2	Cladocopium C3	C3		Miall Island	Central Indo-Pacific	Northeast Australian Shelf	Central and Southern GBR	0	3	-23.15	150.9	Direct from Pub	Direct from Pub	SSCP of ITS1, cloning & sequencing	9	2004	3	2005	Jones 2008 ProcRSocB Community change in the endosymbionts of a coral after a bleaching event	ITS1 primers: symITSFP and SymITSRP, novel SSCP profiles were cloned and sequenced		symITSFP and SymITSRP
1883	Acropora millepora	ITS2	Cladocopium C3	C3		Miall Island	Central Indo-Pacific	Northeast Australian Shelf	Central and Southern GBR	0	3	-23.15	150.9	Direct from Pub	Direct from Pub	SSCP of ITS1, cloning & sequencing	9	2004	3	2005	Jones 2008 ProcRSocB Community change in the endosymbionts of a coral after a bleaching event	ITS1 primers: symITSFP and SymITSRP, novel SSCP profiles were cloned and sequenced		symITSFP and SymITSRP
1884	Acropora millepora	ITS2	Cladocopium C3	C3		Miall Island	Central Indo-Pacific	Northeast Australian Shelf	Central and Southern GBR	0	3	-23.15	150.9	Direct from Pub	Direct from Pub	SSCP of ITS1, cloning & sequencing	9	2004	3	2005	Jones 2008 ProcRSocB Community change in the endosymbionts of a coral after a bleaching event	ITS1 primers: symITSFP and SymITSRP, novel SSCP profiles were cloned and sequenced		symITSFP and SymITSRP
1885	Acropora millepora	ITS2	Cladocopium C3	C3		Miall Island	Central Indo-Pacific	Northeast Australian Shelf	Central and Southern GBR	0	3	-23.15	150.9	Direct from Pub	Direct from Pub	SSCP of ITS1, cloning & sequencing	9	2004	3	2005	Jones 2008 ProcRSocB Community change in the endosymbionts of a coral after a bleaching event	ITS1 primers: symITSFP and SymITSRP, novel SSCP profiles were cloned and sequenced		symITSFP and SymITSRP
1886	Acropora millepora	ITS2	Cladocopium C3	C3		Miall Island	Central Indo-Pacific	Northeast Australian Shelf	Central and Southern GBR	0	3	-23.15	150.9	Direct from Pub	Direct from Pub	SSCP of ITS1, cloning & sequencing	9	2004	3	2005	Jones 2008 ProcRSocB Community change in the endosymbionts of a coral after a bleaching event	ITS1 primers: symITSFP and SymITSRP, novel SSCP profiles were cloned and sequenced		symITSFP and SymITSRP
1887	Acropora millepora	ITS2	Cladocopium C3	C3		Miall Island	Central Indo-Pacific	Northeast Australian Shelf	Central and Southern GBR	0	3	-23.15	150.9	Direct from Pub	Direct from Pub	SSCP of ITS1, cloning & sequencing	9	2004	3	2005	Jones 2008 ProcRSocB Community change in the endosymbionts of a coral after a bleaching event	ITS1 primers: symITSFP and SymITSRP, novel SSCP profiles were cloned and sequenced		symITSFP and SymITSRP
1888	Acropora millepora	ITS2	Cladocopium C3	C3		Miall Island	Central Indo-Pacific	Northeast Australian Shelf	Central and Southern GBR	0	3	-23.15	150.9	Direct from Pub	Direct from Pub	SSCP of ITS1, cloning & sequencing	9	2004	3	2005	Jones 2008 ProcRSocB Community change in the endosymbionts of a coral after a bleaching event	ITS1 primers: symITSFP and SymITSRP, novel SSCP profiles were cloned and sequenced		symITSFP and SymITSRP
1889	Acropora millepora	ITS2	Cladocopium C3	C3		Miall Island	Central Indo-Pacific	Northeast Australian Shelf	Central and Southern GBR	0	3	-23.15	150.9	Direct from Pub	Direct from Pub	SSCP of ITS1, cloning & sequencing	9	2004	3	2005	Jones 2008 ProcRSocB Community change in the endosymbionts of a coral after a bleaching event	ITS1 primers: symITSFP and SymITSRP, novel SSCP profiles were cloned and sequenced		symITSFP and SymITSRP
1890	Acropora millepora	ITS2	Cladocopium C3	C3		Miall Island	Central Indo-Pacific	Northeast Australian Shelf	Central and Southern GBR	0	3	-23.15	150.9	Direct from Pub	Direct from Pub	SSCP of ITS1, cloning & sequencing	9	2004	3	2005	Jones 2008 ProcRSocB Community change in the endosymbionts of a coral after a bleaching event	ITS1 primers: symITSFP and SymITSRP, novel SSCP profiles were cloned and sequenced		symITSFP and SymITSRP
1891	Acropora millepora	ITS2	Cladocopium C3	C3		Miall Island	Central Indo-Pacific	Northeast Australian Shelf	Central and Southern GBR	0	3	-23.15	150.9	Direct from Pub	Direct from Pub	SSCP of ITS1, cloning & sequencing	9	2004	3	2005	Jones 2008 ProcRSocB Community change in the endosymbionts of a coral after a bleaching event	ITS1 primers: symITSFP and SymITSRP, novel SSCP profiles were cloned and sequenced		symITSFP and SymITSRP
1892	Acropora millepora	ITS2	Cladocopium C3	C3		Miall Island	Central Indo-Pacific	Northeast Australian Shelf	Central and Southern GBR	0	3	-23.15	150.9	Direct from Pub	Direct from Pub	SSCP of ITS1, cloning & sequencing	9	2004	3	2005	Jones 2008 ProcRSocB Community change in the endosymbionts of a coral after a bleaching event	ITS1 primers: symITSFP and SymITSRP, novel SSCP profiles were cloned and sequenced		symITSFP and SymITSRP
1893	Acropora millepora	ITS2	Cladocopium C3	C3		Miall Island	Central Indo-Pacific	Northeast Australian Shelf	Central and Southern GBR	0	3	-23.15	150.9	Direct from Pub	Direct from Pub	SSCP of ITS1, cloning & sequencing	9	2004	3	2005	Jones 2008 ProcRSocB Community change in the endosymbionts of a coral after a bleaching event	ITS1 primers: symITSFP and SymITSRP, novel SSCP profiles were cloned and sequenced		symITSFP and SymITSRP
1894	Acropora millepora	ITS2	Cladocopium C3	C3		Miall Island	Central Indo-Pacific	Northeast Australian Shelf	Central and Southern GBR	0	3	-23.15	150.9	Direct from Pub	Direct from Pub	SSCP of ITS1, cloning & sequencing	9	2004	3	2005	Jones 2008 ProcRSocB Community change in the endosymbionts of a coral after a bleaching event	ITS1 primers: symITSFP and SymITSRP, novel SSCP profiles were cloned and sequenced		symITSFP and SymITSRP
1895	Acropora millepora	ITS2	Cladocopium C3	C3		Miall Island	Central Indo-Pacific	Northeast Australian Shelf	Central and Southern GBR	0	3	-23.15	150.9	Direct from Pub	Direct from Pub	SSCP of ITS1, cloning & sequencing	9	2004	3	2005	Jones 2008 ProcRSocB Community change in the endosymbionts of a coral after a bleaching event	ITS1 primers: symITSFP and SymITSRP, novel SSCP profiles were cloned and sequenced		symITSFP and SymITSRP
1896	Acropora millepora	ITS2	Cladocopium C3	C3		Miall Island	Central Indo-Pacific	Northeast Australian Shelf	Central and Southern GBR	0	3	-23.15	150.9	Direct from Pub	Direct from Pub	SSCP of ITS1, cloning & sequencing	9	2004	3	2005	Jones 2008 ProcRSocB Community change in the endosymbionts of a coral after a bleaching event	ITS1 primers: symITSFP and SymITSRP, novel SSCP profiles were cloned and sequenced		symITSFP and SymITSRP
1897	Acropora millepora	ITS2	Cladocopium C3	C3		Miall Island	Central Indo-Pacific	Northeast Australian Shelf	Central and Southern GBR	0	3	-23.15	150.9	Direct from Pub	Direct from Pub	SSCP of ITS1, cloning & sequencing	9	2004	3	2005	Jones 2008 ProcRSocB Community change in the endosymbionts of a coral after a bleaching event	ITS1 primers: symITSFP and SymITSRP, novel SSCP profiles were cloned and sequenced		symITSFP and SymITSRP
1898	Acropora millepora	ITS2	Cladocopium C3	C3		Miall Island	Central Indo-Pacific	Northeast Australian Shelf	Central and Southern GBR	0	3	-23.15	150.9	Direct from Pub	Direct from Pub	SSCP of ITS1, cloning & sequencing	9	2004	3	2005	Jones 2008 ProcRSocB Community change in the endosymbionts of a coral after a bleaching event	ITS1 primers: symITSFP and SymITSRP, novel SSCP profiles were cloned and sequenced		symITSFP and SymITSRP
1899	Acropora millepora	ITS2	Cladocopium C3	C3		Miall Island	Central Indo-Pacific	Northeast Australian Shelf	Central and Southern GBR	0	3	-23.15	150.9	Direct from Pub	Direct from Pub	SSCP of ITS1, cloning & sequencing	9	2004	3	2005	Jones 2008 ProcRSocB Community change in the endosymbionts of a coral after a bleaching event	ITS1 primers: symITSFP and SymITSRP, novel SSCP profiles were cloned and sequenced		symITSFP and SymITSRP
1900	Acropora millepora	ITS2	Cladocopium C3	C3		Miall Island	Central Indo-Pacific	Northeast Australian Shelf	Central and Southern GBR	0	3	-23.15	150.9	Direct from Pub	Direct from Pub	SSCP of ITS1, cloning & sequencing	9	2004	3	2005	Jones 2008 ProcRSocB Community change in the endosymbionts of a coral after a bleaching event	ITS1 primers: symITSFP and SymITSRP, novel SSCP profiles were cloned and sequenced		symITSFP and SymITSRP
1901	Acropora millepora	ITS2	Cladocopium C3	C3		Miall Island	Central Indo-Pacific	Northeast Australian Shelf	Central and Southern GBR	0	3	-23.15	150.9	Direct from Pub	Direct from Pub	SSCP of ITS1, cloning & sequencing	9	2004	3	2005	Jones 2008 ProcRSocB Community change in the endosymbionts of a coral after a bleaching event	ITS1 primers: symITSFP and SymITSRP, novel SSCP profiles were cloned and sequenced		symITSFP and SymITSRP
1902	Acropora millepora	ITS2	Cladocopium C3	C3		Miall Island	Central Indo-Pacific	Northeast Australian Shelf	Central and Southern GBR	0	3	-23.15	150.9	Direct from Pub	Direct from Pub	SSCP of ITS1, cloning & sequencing	9	2004	3	2005	Jones 2008 ProcRSocB Community change in the endosymbionts of a coral after a bleaching event	ITS1 primers: symITSFP and SymITSRP, novel SSCP profiles were cloned and sequenced		symITSFP and SymITSRP
1903	Acropora millepora	ITS2	Cladocopium C3	C3		Miall Island	Central Indo-Pacific	Northeast Australian Shelf	Central and Southern GBR	0	3	-23.15	150.9	Direct from Pub	Direct from Pub	SSCP of ITS1, cloning & sequencing	9	2004	3	2005	Jones 2008 ProcRSocB Community change in the endosymbionts of a coral after a bleaching event	ITS1 primers: symITSFP and SymITSRP, novel SSCP profiles were cloned and sequenced		symITSFP and SymITSRP
1904	Acropora millepora	ITS2	Cladocopium C3	C3		Miall Island	Central Indo-Pacific	Northeast Australian Shelf	Central and Southern GBR	0	3	-23.15	150.9	Direct from Pub	Direct from Pub	SSCP of ITS1, cloning & sequencing	9	2004	3	2005	Jones 2008 ProcRSocB Community change in the endosymbionts of a coral after a bleaching event	ITS1 primers: symITSFP and SymITSRP, novel SSCP profiles were cloned and sequenced		symITSFP and SymITSRP
1905	Acropora millepora	ITS2	Cladocopium C3	C3		Miall Island	Central Indo-Pacific	Northeast Australian Shelf	Central and Southern GBR	0	3	-23.15	150.9	Direct from Pub	Direct from Pub	SSCP of ITS1, cloning & sequencing	9	2004	3	2005	Jones 2008 ProcRSocB Community change in the endosymbionts of a coral after a bleaching event	ITS1 primers: symITSFP and SymITSRP, novel SSCP profiles were cloned and sequenced		symITSFP and SymITSRP
1906	Acropora millepora	ITS2	Cladocopium C3	C3		Miall Island	Central Indo-Pacific	Northeast Australian Shelf	Central and Southern GBR	0	3	-23.15	150.9	Direct from Pub	Direct from Pub	SSCP of ITS1, cloning & sequencing	9	2004	3	2005	Jones 2008 ProcRSocB Community change in the endosymbionts of a coral after a bleaching event	ITS1 primers: symITSFP and SymITSRP, novel SSCP profiles were cloned and sequenced		symITSFP and SymITSRP
1907	Acropora millepora	ITS2	Cladocopium C3	C3		Miall Island	Central Indo-Pacific	Northeast Australian Shelf	Central and Southern GBR	0	3	-23.15	150.9	Direct from Pub	Direct from Pub	SSCP of ITS1, cloning & sequencing	9	2004	3	2005	Jones 2008 ProcRSocB Community change in the endosymbionts of a coral after a bleaching event	ITS1 primers: symITSFP and SymITSRP, novel SSCP profiles were cloned and sequenced		symITSFP and SymITSRP
1908	Acropora millepora	ITS2	Cladocopium C3	C3		Miall Island	Central Indo-Pacific	Northeast Australian Shelf	Central and Southern GBR	0	3	-23.15	150.9	Direct from Pub	Direct from Pub	SSCP of ITS1, cloning & sequencing	9	2004	3	2005	Jones 2008 ProcRSocB Community change in the endosymbionts of a coral after a bleaching event	ITS1 primers: symITSFP and SymITSRP, novel SSCP profiles were cloned and sequenced		symITSFP and SymITSRP
1909	Acropora millepora	ITS2	Cladocopium C3	C3		Miall Island	Central Indo-Pacific	Northeast Australian Shelf	Central and Southern GBR	0	3	-23.15	150.9	Direct from Pub	Direct from Pub	SSCP of ITS1, cloning & sequencing	9	2004	3	2005	Jones 2008 ProcRSocB Community change in the endosymbionts of a coral after a bleaching event	ITS1 primers: symITSFP and SymITSRP, novel SSCP profiles were cloned and sequenced		symITSFP and SymITSRP
1910	Acropora millepora	ITS2	Cladocopium C3	C3		Miall Island	Central Indo-Pacific	Northeast Australian Shelf	Central and Southern GBR	0	3	-23.15	150.9	Direct from Pub	Direct from Pub	SSCP of ITS1, cloning & sequencing	9	2004	3	2005	Jones 2008 ProcRSocB Community change in the endosymbionts of a coral after a bleaching event	ITS1 primers: symITSFP and SymITSRP, novel SSCP profiles were cloned and sequenced		symITSFP and SymITSRP
1911	Acropora millepora	ITS2	Cladocopium C3	C3		Miall Island	Central Indo-Pacific	Northeast Australian Shelf	Central and Southern GBR	0	3	-23.15	150.9	Direct from Pub	Direct from Pub	SSCP of ITS1, cloning & sequencing	9	2004	3	2005	Jones 2008 ProcRSocB Community change in the endosymbionts of a coral after a bleaching event	ITS1 primers: symITSFP and SymITSRP, novel SSCP profiles were cloned and sequenced		symITSFP and SymITSRP
1912	Acropora millepora	ITS2	Cladocopium C3	C3		Miall Island	Central Indo-Pacific	Northeast Australian Shelf	Central and Southern GBR	0	3	-23.15	150.9	Direct from Pub	Direct from Pub	SSCP of ITS1, cloning & sequencing	9	2004	3	2005	Jones 2008 ProcRSocB Community change in the endosymbionts of a coral after a bleaching event	ITS1 primers: symITSFP and SymITSRP, novel SSCP profiles were cloned and sequenced		symITSFP and SymITSRP
1913	Acropora millepora	ITS2	Cladocopium C3	C3		Miall Island	Central Indo-Pacific	Northeast Australian Shelf	Central and Southern GBR	0	3	-23.15	150.9	Direct from Pub	Direct from Pub	SSCP of ITS1, cloning & sequencing	9	2004	3	2005	Jones 2008 ProcRSocB Community change in the endosymbionts of a coral after a bleaching event	ITS1 primers: symITSFP and SymITSRP, novel SSCP profiles were cloned and sequenced		symITSFP and SymITSRP
1914	Acropora millepora	ITS2	Cladocopium C3	C3		Miall Island	Central Indo-Pacific	Northeast Australian Shelf	Central and Southern GBR	0	3	-23.15	150.9	Direct from Pub	Direct from Pub	SSCP of ITS1, cloning & sequencing	9	2004	3	2005	Jones 2008 ProcRSocB Community change in the endosymbionts of a coral after a bleaching event	ITS1 primers: symITSFP and SymITSRP, novel SSCP profiles were cloned and sequenced		symITSFP and SymITSRP
1915	Acropora millepora	ITS2	Cladocopium C3	C3		Miall Island	Central Indo-Pacific	Northeast Australian Shelf	Central and Southern GBR	0	3	-23.15	150.9	Direct from Pub	Direct from Pub	SSCP of ITS1, cloning & sequencing	9	2004	3	2005	Jones 2008 ProcRSocB Community change in the endosymbionts of a coral after a bleaching event	ITS1 primers: symITSFP and SymITSRP, novel SSCP profiles were cloned and sequenced		symITSFP and SymITSRP
1916	Acropora millepora	ITS2	Cladocopium C3	C3		Miall Island	Central Indo-Pacific	Northeast Australian Shelf	Central and Southern GBR	0	3	-23.15	150.9	Direct from Pub	Direct from Pub	SSCP of ITS1, cloning & sequencing	9	2004	3	2005	Jones 2008 ProcRSocB Community change in the endosymbionts of a coral after a bleaching event	ITS1 primers: symITSFP and SymITSRP, novel SSCP profiles were cloned and sequenced		symITSFP and SymITSRP
1917	Acropora millepora	ITS2	Cladocopium C3	C3		Miall Island	Central Indo-Pacific	Northeast Australian Shelf	Central and Southern GBR	0	3	-23.15	150.9	Direct from Pub	Direct from Pub	SSCP of ITS1, cloning & sequencing	9	2004	3	2005	Jones 2008 ProcRSocB Community change in the endosymbionts of a coral after a bleaching event	ITS1 primers: symITSFP and SymITSRP, novel SSCP profiles were cloned and sequenced		symITSFP and SymITSRP
1918	Acropora millepora	ITS2	Cladocopium C3	C3		Miall Island	Central Indo-Pacific	Northeast Australian Shelf	Central and Southern GBR	0	3	-23.15	150.9	Direct from Pub	Direct from Pub	SSCP of ITS1, cloning & sequencing	9	2004	3	2005	Jones 2008 ProcRSocB Community change in the endosymbionts of a coral after a bleaching event	ITS1 primers: symITSFP and SymITSRP, novel SSCP profiles were cloned and sequenced		symITSFP and SymITSRP
1919	Acropora millepora	ITS2	Cladocopium C3	C3		Miall Island	Central Indo-Pacific	Northeast Australian Shelf	Central and Southern GBR	0	3	-23.15	150.9	Direct from Pub	Direct from Pub	SSCP of ITS1, cloning & sequencing	9	2004	3	2005	Jones 2008 ProcRSocB Community change in the endosymbionts of a coral after a bleaching event	ITS1 primers: symITSFP and SymITSRP, novel SSCP profiles were cloned and sequenced		symITSFP and SymITSRP
1920	Acropora millepora	ITS2	Cladocopium C3	C3		Miall Island	Central Indo-Pacific	Northeast Australian Shelf	Central and Southern GBR	0	3	-23.15	150.9	Direct from Pub	Direct from Pub	SSCP of ITS1, cloning & sequencing	9	2004	3	2005	Jones 2008 ProcRSocB Community change in the endosymbionts of a coral after a bleaching event	ITS1 primers: symITSFP and SymITSRP, novel SSCP profiles were cloned and sequenced		symITSFP and SymITSRP
1921	Acropora millepora	ITS2	Cladocopium C3	C3		Miall Island	Central Indo-Pacific	Northeast Australian Shelf	Central and Southern GBR	0	3	-23.15	150.9	Direct from Pub	Direct from Pub	SSCP of ITS1, cloning & sequencing	9	2004	3	2005	Jones 2008 ProcRSocB Community change in the endosymbionts of a coral after a bleaching event	ITS1 primers: symITSFP and SymITSRP, novel SSCP profiles were cloned and sequenced		symITSFP and SymITSRP
1922	Acropora millepora	ITS2	Cladocopium C3	C3		Miall Island	Central Indo-Pacific	Northeast Australian Shelf	Central and Southern GBR	0	3	-23.15	150.9	Direct from Pub	Direct from Pub	SSCP of ITS1, cloning & sequencing	9	2004	3	2005	Jones 2008 ProcRSocB Community change in the endosymbionts of a coral after a bleaching event	ITS1 primers: symITSFP and SymITSRP, novel SSCP profiles were cloned and sequenced		symITSFP and SymITSRP
1923	Acropora millepora	ITS2	Cladocopium C3	C3		Miall Island	Central Indo-Pacific	Northeast Australian Shelf	Central and Southern GBR	0	3	-23.15	150.9	Direct from Pub	Direct from Pub	SSCP of ITS1, cloning & sequencing	9	2004	3	2005	Jones 2008 ProcRSocB Community change in the endosymbionts of a coral after a bleaching event	ITS1 primers: symITSFP and SymITSRP, novel SSCP profiles were cloned and sequenced		symITSFP and SymITSRP
1924	Acropora millepora	ITS2	Cladocopium C3	C3		Miall Island	Central Indo-Pacific	Northeast Australian Shelf	Central and Southern GBR	0	3	-23.15	150.9	Direct from Pub	Direct from Pub	SSCP of ITS1, cloning & sequencing	9	2004	3	2005	Jones 2008 ProcRSocB Community change in the endosymbionts of a coral after a bleaching event	ITS1 primers: symITSFP and SymITSRP, novel SSCP profiles were cloned and sequenced		symITSFP and SymITSRP
1925	Acropora millepora	ITS2	Cladocopium C3	C3		Miall Island	Central Indo-Pacific	Northeast Australian Shelf	Central and Southern GBR	0	3	-23.15	150.9	Direct from Pub	Direct from Pub	SSCP of ITS1, cloning & sequencing	9	2004	3	2005	Jones 2008 ProcRSocB Community change in the endosymbionts of a coral after a bleaching event	ITS1 primers: symITSFP and SymITSRP, novel SSCP profiles were cloned and sequenced		symITSFP and SymITSRP
1926	Acropora millepora	ITS2	Cladocopium C3	C3		Miall Island	Central Indo-Pacific	Northeast Australian Shelf	Central and Southern GBR	0	3	-23.15	150.9	Direct from Pub	Direct from Pub	SSCP of ITS1, cloning & sequencing	9	2004	3	2005	Jones 2008 ProcRSocB Community change in the endosymbionts of a coral after a bleaching event	ITS1 primers: symITSFP and SymITSRP, novel SSCP profiles were cloned and sequenced		symITSFP and SymITSRP
1927	Acropora millepora	ITS2	Cladocopium C3	C3		Miall Island	Central Indo-Pacific	Northeast Australian Shelf	Central and Southern GBR	0	3	-23.15	150.9	Direct from Pub	Direct from Pub	SSCP of ITS1, cloning & sequencing	9	2004	3	2005	Jones 2008 ProcRSocB Community change in the endosymbionts of a coral after a bleaching event	ITS1 primers: symITSFP and SymITSRP, novel SSCP profiles were cloned and sequenced		symITSFP and SymITSRP
1928	Acropora millepora	ITS2	Cladocopium C3	C3		Miall Island	Central Indo-Pacific	Northeast Australian Shelf	Central and Southern GBR	0	3	-23.15	150.9	Direct from Pub	Direct from Pub	SSCP of ITS1, cloning & sequencing	9	2004	3	2005	Jones 2008 ProcRSocB Community change in the endosymbionts of a coral after a bleaching event	ITS1 primers: symITSFP and SymITSRP, novel SSCP profiles were cloned and sequenced		symITSFP and SymITSRP
1929	Acropora millepora	ITS2	Cladocopium C3	C3		Miall Island	Central Indo-Pacific	Northeast Australian Shelf	Central and Southern GBR	0	3	-23.15	150.9	Direct from Pub	Direct from Pub	SSCP of ITS1, cloning & sequencing	9	2004	3	2005	Jones 2008 ProcRSocB Community change in the endosymbionts of a coral after a bleaching event	ITS1 primers: symITSFP and SymITSRP, novel SSCP profiles were cloned and sequenced		symITSFP and SymITSRP
1930	Acropora millepora	ITS2	Cladocopium C3	C3		Miall Island	Central Indo-Pacific	Northeast Australian Shelf	Central and Southern GBR	0	3	-23.15	150.9	Direct from Pub	Direct from Pub	SSCP of ITS1, cloning & sequencing	9	2004	3	2005	Jones 2008 ProcRSocB Community change in the endosymbionts of a coral after a bleaching event	ITS1 primers: symITSFP and SymITSRP, novel SSCP profiles were cloned and sequenced		symITSFP and SymITSRP
1931	Acropora millepora	ITS2	Cladocopium C3	C3		Miall Island	Central Indo-Pacific	Northeast Australian Shelf	Central and Southern GBR	0	3	-23.15	150.9	Direct from Pub	Direct from Pub	SSCP of ITS1, cloning & sequencing	9	2004	3	2005	Jones 2008 ProcRSocB Community change in the endosymbionts of a coral after a bleaching event	ITS1 primers: symITSFP and SymITSRP, novel SSCP profiles were cloned and sequenced		symITSFP and SymITSRP
1932	Acropora millepora	ITS2	Cladocopium C3	C3		Miall Island	Central Indo-Pacific	Northeast Australian Shelf	Central and Southern GBR	0	3	-23.15	150.9	Direct from Pub	Direct from Pub	SSCP of ITS1, cloning & sequencing	9	2004	3	2005	Jones 2008 ProcRSocB Community change in the endosymbionts of a coral after a bleaching event	ITS1 primers: symITSFP and SymITSRP, novel SSCP profiles were cloned and sequenced		symITSFP and SymITSRP
1933	Acropora millepora	ITS2	Cladocopium C3	C3		Miall Island	Central Indo-Pacific	Northeast Australian Shelf	Central and Southern GBR	0	3	-23.15	150.9	Direct from Pub	Direct from Pub	SSCP of ITS1, cloning & sequencing	9	2004	3	2005	Jones 2008 ProcRSocB Community change in the endosymbionts of a coral after a bleaching event	ITS1 primers: symITSFP and SymITSRP, novel SSCP profiles were cloned and sequenced		symITSFP and SymITSRP
1934	Acropora millepora	ITS2	Cladocopium C3	C3		Miall Island	Central Indo-Pacific	Northeast Australian Shelf	Central and Southern GBR	0	3	-23.15	150.9	Direct from Pub	Direct from Pub	SSCP of ITS1, cloning & sequencing	9	2004	3	2005	Jones 2008 ProcRSocB Community change in the endosymbionts of a coral after a bleaching event	ITS1 primers: symITSFP and SymITSRP, novel SSCP profiles were cloned and sequenced		symITSFP and SymITSRP
1935	Acropora millepora	ITS2	Cladocopium C3	C3		Miall Island	Central Indo-Pacific	Northeast Australian Shelf	Central and Southern GBR	0	3	-23.15	150.9	Direct from Pub	Direct from Pub	SSCP of ITS1, cloning & sequencing	9	2004	3	2005	Jones 2008 ProcRSocB Community change in the endosymbionts of a coral after a bleaching event	ITS1 primers: symITSFP and SymITSRP, novel SSCP profiles were cloned and sequenced		symITSFP and SymITSRP
1936	Acropora millepora	ITS2	Cladocopium C3	C3		Miall Island	Central Indo-Pacific	Northeast Australian Shelf	Central and Southern GBR	0	3	-23.15	150.9	Direct from Pub	Direct from Pub	SSCP of ITS1, cloning & sequencing	9	2004	3	2005	Jones 2008 ProcRSocB Community change in the endosymbionts of a coral after a bleaching event	ITS1 primers: symITSFP and SymITSRP, novel SSCP profiles were cloned and sequenced		symITSFP and SymITSRP
1937	Acropora millepora	ITS2	Cladocopium C3	C3		Miall Island	Central Indo-Pacific	Northeast Australian Shelf	Central and Southern GBR	0	3	-23.15	150.9	Direct from Pub	Direct from Pub	SSCP of ITS1, cloning & sequencing	9	2004	3	2005	Jones 2008 ProcRSocB Community change in the endosymbionts of a coral after a bleaching event	ITS1 primers: symITSFP and SymITSRP, novel SSCP profiles were cloned and sequenced		symITSFP and SymITSRP
1938	Acropora millepora	ITS2	Cladocopium C3	C3		Miall Island	Central Indo-Pacific	Northeast Australian Shelf	Central and Southern GBR	0	3	-23.15	150.9	Direct from Pub	Direct from Pub	SSCP of ITS1, cloning & sequencing	9	2004	3	2005	Jones 2008 ProcRSocB Community change in the endosymbionts of a coral after a bleaching event	ITS1 primers: symITSFP and SymITSRP, novel SSCP profiles were cloned and sequenced		symITSFP and SymITSRP
1939	Acropora millepora	ITS2	Cladocopium C3	C3		Miall Island	Central Indo-Pacific	Northeast Australian Shelf	Central and Southern GBR	0	3	-23.15	150.9	Direct from Pub	Direct from Pub	SSCP of ITS1, cloning & sequencing	9	2004	3	2005	Jones 2008 ProcRSocB Community change in the endosymbionts of a coral after a bleaching event	ITS1 primers: symITSFP and SymITSRP, novel SSCP profiles were cloned and sequenced		symITSFP and SymITSRP
1940	Acropora millepora	ITS2	Cladocopium C3	C3		Miall Island	Central Indo-Pacific	Northeast Australian Shelf	Central and Southern GBR	0	3	-23.15	150.9	Direct from Pub	Direct from Pub	SSCP of ITS1, cloning & sequencing	9	2004	3	2005	Jones 2008 ProcRSocB Community change in the endosymbionts of a coral after a bleaching event	ITS1 primers: symITSFP and SymITSRP, novel SSCP profiles were cloned and sequenced		symITSFP and SymITSRP
1941	Acropora millepora	ITS2	Cladocopium C3	C3		Miall Island	Central Indo-Pacific	Northeast Australian Shelf	Central and Southern GBR	0	3	-23.15	150.9	Direct from Pub	Direct from Pub	SSCP of ITS1, cloning & sequencing	9	2004	3	2005	Jones 2008 ProcRSocB Community change in the endosymbionts of a coral after a bleaching event	ITS1 primers: symITSFP and SymITSRP, novel SSCP profiles were cloned and sequenced		symITSFP and SymITSRP
1942	Acropora millepora	ITS2	Cladocopium C3	C3		Miall Island	Central Indo-Pacific	Northeast Australian Shelf	Central and Southern GBR	0	3	-23.15	150.9	Direct from Pub	Direct from Pub	SSCP of ITS1, cloning & sequencing	9	2004	3	2005	Jones 2008 ProcRSocB Community change in the endosymbionts of a coral after a bleaching event	ITS1 primers: symITSFP and SymITSRP, novel SSCP profiles were cloned and sequenced		symITSFP and SymITSRP
1943	Acropora millepora	ITS2	Cladocopium C3	C3		Miall Island	Central Indo-Pacific	Northeast Australian Shelf	Central and Southern GBR	0	3	-23.15	150.9	Direct from Pub	Direct from Pub	SSCP of ITS1, cloning & sequencing	9	2004	3	2005	Jones 2008 ProcRSocB Community change in the endosymbionts of a coral after a bleaching event	ITS1 primers: symITSFP and SymITSRP, novel SSCP profiles were cloned and sequenced		symITSFP and SymITSRP
1944	Acropora millepora	ITS2	Cladocopium C3	C3		Miall Island	Central Indo-Pacific	Northeast Australian Shelf	Central and Southern GBR	0	3	-23.15	150.9	Direct from Pub	Direct from Pub	SSCP of ITS1, cloning & sequencing	9	2004	3	2005	Jones 2008 ProcRSocB Community change in the endosymbionts of a coral after a bleaching event	ITS1 primers: symITSFP and SymITSRP, novel SSCP profiles were cloned and sequenced		symITSFP and SymITSRP
1945	Acropora millepora	ITS2	Cladocopium C3	C3		Miall Island	Central Indo-Pacific	Northeast Australian Shelf	Central and Southern GBR	0	3	-23.15	150.9	Direct from Pub	Direct from Pub	SSCP of ITS1, cloning & sequencing	9	2004	3	2005	Jones 2008 ProcRSocB Community change in the endosymbionts of a coral after a bleaching event	ITS1 primers: symITSFP and SymITSRP, novel SSCP profiles were cloned and sequenced		symITSFP and SymITSRP
1946	Acropora millepora	ITS2	Cladocopium C3	C3		Miall Island	Central Indo-Pacific	Northeast Australian Shelf	Central and Southern GBR	0	3	-23.15	150.9	Direct from Pub	Direct from Pub	SSCP of ITS1, cloning & sequencing	9	2004	3	2005	Jones 2008 ProcRSocB Community change in the endosymbionts of a coral after a bleaching event	ITS1 primers: symITSFP and SymITSRP, novel SSCP profiles were cloned and sequenced		symITSFP and SymITSRP
1947	Acropora millepora	ITS2	Cladocopium C3	C3		Miall Island	Central Indo-Pacific	Northeast Australian Shelf	Central and Southern GBR	0	3	-23.15	150.9	Direct from Pub	Direct from Pub	SSCP of ITS1, cloning & sequencing	9	2004	3	2005	Jones 2008 ProcRSocB Community change in the endosymbionts of a coral after a bleaching event	ITS1 primers: symITSFP and SymITSRP, novel SSCP profiles were cloned and sequenced		symITSFP and SymITSRP
1948	Acropora millepora	ITS2	Cladocopium C3	C3		Miall Island	Central Indo-Pacific	Northeast Australian Shelf	Central and Southern GBR	0	3	-23.15	150.9	Direct from Pub	Direct from Pub	SSCP of ITS1, cloning & sequencing	9	2004	3	2005	Jones 2008 ProcRSocB Community change in the endosymbionts of a coral after a bleaching event	ITS1 primers: symITSFP and SymITSRP, novel SSCP profiles were cloned and sequenced		symITSFP and SymITSRP
1949	Acropora millepora	ITS2	Cladocopium C3	C3		Miall Island	Central Indo-Pacific	Northeast Australian Shelf	Central and Southern GBR	0	3	-23.15	150.9	Direct from Pub	Direct from Pub	SSCP of ITS1, cloning & sequencing	9	2004	3	2005	Jones 2008 ProcRSocB Community change in the endosymbionts of a coral after a bleaching event	ITS1 primers: symITSFP and SymITSRP, novel SSCP profiles were cloned and sequenced		symITSFP and SymITSRP
1950	Acropora millepora	ITS2	Cladocopium C3	C3		Miall Island	Central Indo-Pacific	Northeast Australian Shelf	Central and Southern GBR	0	3	-23.15	150.9	Direct from Pub	Direct from Pub	SSCP of ITS1, cloning & sequencing	9	2004	3	2005	Jones 2008 ProcRSocB Community change in the endosymbionts of a coral after a bleaching event	ITS1 primers: symITSFP and SymITSRP, novel SSCP profiles were cloned and sequenced		symITSFP and SymITSRP
1951	Acropora millepora	ITS2	Cladocopium C3	C3		Miall Island	Central Indo-Pacific	Northeast Australian Shelf	Central and Southern GBR	0	3	-23.15	150.9	Direct from Pub	Direct from Pub	SSCP of ITS1, cloning & sequencing	9	2004	3	2005	Jones 2008 ProcRSocB Community change in the endosymbionts of a coral after a bleaching event	ITS1 primers: symITSFP and SymITSRP, novel SSCP profiles were cloned and sequenced		symITSFP and SymITSRP
1952	Acropora millepora	ITS2	Cladocopium C3	C3		Miall Island	Central Indo-Pacific	Northeast Australian Shelf	Central and Southern GBR	0	3	-23.15	150.9	Direct from Pub	Direct from Pub	SSCP of ITS1, cloning & sequencing	9	2004	3	2005	Jones 2008 ProcRSocB Community change in the endosymbionts of a coral after a bleaching event	ITS1 primers: symITSFP and SymITSRP, novel SSCP profiles were cloned and sequenced		symITSFP and SymITSRP
1953	Acropora millepora	ITS2	Cladocopium C3	C3		Miall Island	Central Indo-Pacific	Northeast Australian Shelf	Central and Southern GBR	0	3	-23.15	150.9	Direct from Pub	Direct from Pub	SSCP of ITS1, cloning & sequencing	9	2004	3	2005	Jones 2008 ProcRSocB Community change in the endosymbionts of a coral after a bleaching event	ITS1 primers: symITSFP and SymITSRP, novel SSCP profiles were cloned and sequenced		symITSFP and SymITSRP
1954	Acropora millepora	ITS2	Cladocopium C3	C3		Miall Island	Central Indo-Pacific	Northeast Australian Shelf	Central and Southern GBR	0	3	-23.15	150.9	Direct from Pub	Direct from Pub	SSCP of ITS1, cloning & sequencing	9	2004	3	2005	Jones 2008 ProcRSocB Community change in the endosymbionts of a coral after a bleaching event	ITS1 primers: symITSFP and SymITSRP, novel SSCP profiles were cloned and sequenced		symITSFP and SymITSRP
1955	Acropora millepora	ITS2	Cladocopium C3	C3		Miall Island	Central Indo-Pacific	Northeast Australian Shelf	Central and Southern GBR	0	3	-23.15	150.9	Direct from Pub	Direct from Pub	SSCP of ITS1, cloning & sequencing	9	2004	3	2005	Jones 2008 ProcRSocB Community change in the endosymbionts of a coral after a bleaching event	ITS1 primers: symITSFP and SymITSRP, novel SSCP profiles were cloned and sequenced		symITSFP and SymITSRP
1956	Acropora millepora	ITS2	Cladocopium C3	C3		Miall Island	Central Indo-Pacific	Northeast Australian Shelf	Central and Southern GBR	0	3	-23.15	150.9	Direct from Pub	Direct from Pub	SSCP of ITS1, cloning & sequencing	9	2004	3	2005	Jones 2008 ProcRSocB Community change in the endosymbionts of a coral after a bleaching event	ITS1 primers: symITSFP and SymITSRP, novel SSCP profiles were cloned and sequenced		symITSFP and SymITSRP
1957	Acropora millepora	ITS2	Cladocopium C3	C3		Miall Island	Central Indo-Pacific	Northeast Australian Shelf	Central and Southern GBR	0	3	-23.15	150.9	Direct from Pub	Direct from Pub	SSCP of ITS1, cloning & sequencing	9	2004	3	2005	Jones 2008 ProcRSocB Community change in the endosymbionts of a coral after a bleaching event	ITS1 primers: symITSFP and SymITSRP, novel SSCP profiles were cloned and sequenced		symITSFP and SymITSRP
1958	Acropora millepora	ITS2	Cladocopium C3	C3		Miall Island	Central Indo-Pacific	Northeast Australian Shelf	Central and Southern GBR	0	3	-23.15	150.9	Direct from Pub	Direct from Pub	SSCP of ITS1, cloning & sequencing	9	2004	3	2005	Jones 2008 ProcRSocB Community change in the endosymbionts of a coral after a bleaching event	ITS1 primers: symITSFP and SymITSRP, novel SSCP profiles were cloned and sequenced		symITSFP and SymITSRP
1959	Acropora millepora	ITS2	Cladocopium C3	C3		Miall Island	Central Indo-Pacific	Northeast Australian Shelf	Central and Southern GBR	0	3	-23.15	150.9	Direct from Pub	Direct from Pub	SSCP of ITS1, cloning & sequencing	9	2004	3	2005	Jones 2008 ProcRSocB Community change in the endosymbionts of a coral after a bleaching event	ITS1 primers: symITSFP and SymITSRP, novel SSCP profiles were cloned and sequenced		symITSFP and SymITSRP
1960	Acropora millepora	ITS2	Cladocopium C3	C3		Miall Island	Central Indo-Pacific	Northeast Australian Shelf	Central and Southern GBR	0	3	-23.15	150.9	Direct from Pub	Direct from Pub	SSCP of ITS1, cloning & sequencing	9	2004	3	2005	Jones 2008 ProcRSocB Community change in the endosymbionts of a coral after a bleaching event	ITS1 primers: symITSFP and SymITSRP, novel SSCP profiles were cloned and sequenced		symITSFP and SymITSRP
1961	Acropora millepora	ITS2	Cladocopium C3	C3		Miall Island	Central Indo-Pacific	Northeast Australian Shelf	Central and Southern GBR	0	3	-23.15	150.9	Direct from Pub	Direct from Pub	SSCP of ITS1, cloning & sequencing	9	2004	3	2005	Jones 2008 ProcRSocB Community change in the endosymbionts of a coral after a bleaching event	ITS1 primers: symITSFP and SymITSRP, novel SSCP profiles were cloned and sequenced		symITSFP and SymITSRP
1962	Acropora millepora	ITS2	Cladocopium C3	C3		Miall Island	Central Indo-Pacific	Northeast Australian Shelf	Central and Southern GBR	0	3	-23.15	150.9	Direct from Pub	Direct from Pub	SSCP of ITS1, cloning & sequencing	9	2004	3	2005	Jones 2008 ProcRSocB Community change in the endosymbionts of a coral after a bleaching event	ITS1 primers: symITSFP and SymITSRP, novel SSCP profiles were cloned and sequenced		symITSFP and SymITSRP
1963	Acropora millepora	ITS2	Cladocopium C3	C3		Miall Island	Central Indo-Pacific	Northeast Australian Shelf	Central and Southern GBR	0	3	-23.15	150.9	Direct from Pub	Direct from Pub	SSCP of ITS1, cloning & sequencing	9	2004	3	2005	Jones 2008 ProcRSocB Community change in the endosymbionts of a coral after a bleaching event	ITS1 primers: symITSFP and SymITSRP, novel SSCP profiles were cloned and sequenced		symITSFP and SymITSRP
1964	Acropora millepora	ITS2	Cladocopium C3	C3		Miall Island	Central Indo-Pacific	Northeast Australian Shelf	Central and Southern GBR	0	3	-23.15	150.9	Direct from Pub	Direct from Pub	SSCP of ITS1, cloning & sequencing	9	2004	3	2005	Jones 2008 ProcRSocB Community change in the endosymbionts of a coral after a bleaching event	ITS1 primers: symITSFP and SymITSRP, novel SSCP profiles were cloned and sequenced		symITSFP and SymITSRP
1965	Acropora millepora	ITS2	Cladocopium C3	C3		Miall Island	Central Indo-Pacific	Northeast Australian Shelf	Central and Southern GBR	0	3	-23.15	150.9	Direct from Pub	Direct from Pub	SSCP of ITS1, cloning & sequencing	9	2004	3	2005	Jones 2008 ProcRSocB Community change in the endosymbionts of a coral after a bleaching event	ITS1 primers: symITSFP and SymITSRP, novel SSCP profiles were cloned and sequenced		symITSFP and SymITSRP
1966	Acropora millepora	ITS2	Cladocopium C3	C3		Miall Island	Central Indo-Pacific	Northeast Australian Shelf	Central and Southern GBR	0	3	-23.15	150.9	Direct from Pub	Direct from Pub	SSCP of ITS1, cloning & sequencing	9	2004	3	2005	Jones 2008 ProcRSocB Community change in the endosymbionts of a coral after a bleaching event	ITS1 primers: symITSFP and SymITSRP, novel SSCP profiles were cloned and sequenced		symITSFP and SymITSRP
1967	Acropora millepora	ITS2	Cladocopium C3	C3		Miall Island	Central Indo-Pacific	Northeast Australian Shelf	Central and Southern GBR	0	3	-23.15	150.9	Direct from Pub	Direct from Pub	SSCP of ITS1, cloning & sequencing	9	2004	3	2005	Jones 2008 ProcRSocB Community change in the endosymbionts of a coral after a bleaching event	ITS1 primers: symITSFP and SymITSRP, novel SSCP profiles were cloned and sequenced		symITSFP and SymITSRP
1968	Acropora millepora	ITS2	Cladocopium C3	C3		Miall Island	Central Indo-Pacific	Northeast Australian Shelf	Central and Southern GBR	0	3	-23.15	150.9	Direct from Pub	Direct from Pub	SSCP of ITS1, cloning & sequencing	9	2004	3	2005	Jones 2008 ProcRSocB Community change in the endosymbionts of a coral after a bleaching event	ITS1 primers: symITSFP and SymITSRP, novel SSCP profiles were cloned and sequenced		symITSFP and SymITSRP
1969	Acropora millepora	ITS2	Cladocopium C3	C3		Miall Island	Central Indo-Pacific	Northeast Australian Shelf	Central and Southern GBR	0	3	-23.15	150.9	Direct from Pub	Direct from Pub	SSCP of ITS1, cloning & sequencing	9	2004	3	2005	Jones 2008 ProcRSocB Community change in the endosymbionts of a coral after a bleaching event	ITS1 primers: symITSFP and SymITSRP, novel SSCP profiles were cloned and sequenced		symITSFP and SymITSRP
1970	Acropora millepora	ITS2	Cladocopium C3	C3		Miall Island	Central Indo-Pacific	Northeast Australian Shelf	Central and Southern GBR	0	3	-23.15	150.9	Direct from Pub	Direct from Pub	SSCP of ITS1, cloning & sequencing	9	2004	3	2005	Jones 2008 ProcRSocB Community change in the endosymbionts of a coral after a bleaching event	ITS1 primers: symITSFP and SymITSRP, novel SSCP profiles were cloned and sequenced		symITSFP and SymITSRP
1971	Acropora millepora	ITS2	Cladocopium C3	C3		Miall Island	Central Indo-Pacific	Northeast Australian Shelf	Central and Southern GBR	0	3	-23.15	150.9	Direct from Pub	Direct from Pub	SSCP of ITS1, cloning & sequencing	9	2004	3	2005	Jones 2008 ProcRSocB Community change in the endosymbionts of a coral after a bleaching event	ITS1 primers: symITSFP and SymITSRP, novel SSCP profiles were cloned and sequenced		symITSFP and SymITSRP
1972	Acropora millepora	ITS2	Cladocopium C3	C3		Miall Island	Central Indo-Pacific	Northeast Australian Shelf	Central and Southern GBR	0	3	-23.15	150.9	Direct from Pub	Direct from Pub	SSCP of ITS1, cloning & sequencing	9	2004	3	2005	Jones 2008 ProcRSocB Community change in the endosymbionts of a coral after a bleaching event	ITS1 primers: symITSFP and SymITSRP, novel SSCP profiles were cloned and sequenced		symITSFP and SymITSRP
1973	Acropora millepora	ITS2	Cladocopium C3	C3		Miall Island	Central Indo-Pacific	Northeast Australian Shelf	Central and Southern GBR	0	3	-23.15	150.9	Direct from Pub	Direct from Pub	SSCP of ITS1, cloning & sequencing	9	2004	3	2005	Jones 2008 ProcRSocB Community change in the endosymbionts of a coral after a bleaching event	ITS1 primers: symITSFP and SymITSRP, novel SSCP profiles were cloned and sequenced		symITSFP and SymITSRP
1974	Acropora millepora	ITS2	Cladocopium C3	C3		Miall Island	Central Indo-Pacific	Northeast Australian Shelf	Central and Southern GBR	0	3	-23.15	150.9	Direct from Pub	Direct from Pub	SSCP of ITS1, cloning & sequencing	9	2004	3	2005	Jones 2008 ProcRSocB Community change in the endosymbionts of a coral after a bleaching event	ITS1 primers: symITSFP and SymITSRP, novel SSCP profiles were cloned and sequenced		symITSFP and SymITSRP
1975	Acropora millepora	ITS2	Cladocopium C3	C3		Miall Island	Central Indo-Pacific	Northeast Australian Shelf	Central and Southern GBR	0	3	-23.15	150.9	Direct from Pub	Direct from Pub	SSCP of ITS1, cloning & sequencing	9	2004	3	2005	Jones 2008 ProcRSocB Community change in the endosymbionts of a coral after a bleaching event	ITS1 primers: symITSFP and SymITSRP, novel SSCP profiles were cloned and sequenced		symITSFP and SymITSRP
1976	Acropora millepora	ITS2	Cladocopium C3	C3		Miall Island	Central Indo-Pacific	Northeast Australian Shelf	Central and Southern GBR	0	3	-23.15	150.9	Direct from Pub	Direct from Pub	SSCP of ITS1, cloning & sequencing	9	2004	3	2005	Jones 2008 ProcRSocB Community change in the endosymbionts of a coral after a bleaching event	ITS1 primers: symITSFP and SymITSRP, novel SSCP profiles were cloned and sequenced		symITSFP and SymITSRP
1977	Acropora millepora	ITS2	Cladocopium C3	C3		Miall Island	Central Indo-Pacific	Northeast Australian Shelf	Central and Southern GBR	0	3	-23.15	150.9	Direct from Pub	Direct from Pub	SSCP of ITS1, cloning & sequencing	9	2004	3	2005	Jones 2008 ProcRSocB Community change in the endosymbionts of a coral after a bleaching event	ITS1 primers: symITSFP and SymITSRP, novel SSCP profiles were cloned and sequenced		symITSFP and SymITSRP
1978	Acropora millepora	ITS2	Cladocopium C3	C3		Miall Island	Central Indo-Pacific	Northeast Australian Shelf	Central and Southern GBR	0	3	-23.15	150.9	Direct from Pub	Direct from Pub	SSCP of ITS1, cloning & sequencing	9	2004	3	2005	Jones 2008 ProcRSocB Community change in the endosymbionts of a coral after a bleaching event	ITS1 primers: symITSFP and SymITSRP, novel SSCP profiles were cloned and sequenced		symITSFP and SymITSRP
1979	Acropora millepora	ITS2	Cladocopium C3	C3		Miall Island	Central Indo-Pacific	Northeast Australian Shelf	Central and Southern GBR	0	3	-23.15	150.9	Direct from Pub	Direct from Pub	SSCP of ITS1, cloning & sequencing	9	2004	3	2005	Jones 2008 ProcRSocB Community change in the endosymbionts of a coral after a bleaching event	ITS1 primers: symITSFP and SymITSRP, novel SSCP profiles were cloned and sequenced		symITSFP and SymITSRP
1980	Acropora millepora	ITS2	Cladocopium C3	C3		Miall Island	Central Indo-Pacific	Northeast Australian Shelf	Central and Southern GBR	0	3	-23.15	150.9	Direct from Pub	Direct from Pub	SSCP of ITS1, cloning & sequencing	9	2004	3	2005	Jones 2008 ProcRSocB Community change in the endosymbionts of a coral after a bleaching event	ITS1 primers: symITSFP and SymITSRP, novel SSCP profiles were cloned and sequenced		symITSFP and SymITSRP
1981	Acropora millepora	ITS2	Cladocopium C3	C3		Miall Island	Central Indo-Pacific	Northeast Australian Shelf	Central and Southern GBR	0	3	-23.15	150.9	Direct from Pub	Direct from Pub	SSCP of ITS1, cloning & sequencing	9	2004	3	2005	Jones 2008 ProcRSocB Community change in the endosymbionts of a coral after a bleaching event	ITS1 primers: symITSFP and SymITSRP, novel SSCP profiles were cloned and sequenced		symITSFP and SymITSRP
1982	Acropora millepora	ITS2	Cladocopium C3	C3		Miall Island	Central Indo-Pacific	Northeast Australian Shelf	Central and Southern GBR	0	3	-23.15	150.9	Direct from Pub	Direct from Pub	SSCP of ITS1, cloning & sequencing	9	2004	3	2005	Jones 2008 ProcRSocB Community change in the endosymbionts of a coral after a bleaching event	ITS1 primers: symITSFP and SymITSRP, novel SSCP profiles were cloned and sequenced		symITSFP and SymITSRP
1983	Acropora millepora	ITS2	Cladocopium C3	C3		Miall Island	Central Indo-Pacific	Northeast Australian Shelf	Central and Southern GBR	0	3	-23.15	150.9	Direct from Pub	Direct from Pub	SSCP of ITS1, cloning & sequencing	9	2004	3	2005	Jones 2008 ProcRSocB Community change in the endosymbionts of a coral after a bleaching event	ITS1 primers: symITSFP and SymITSRP, novel SSCP profiles were cloned and sequenced		symITSFP and SymITSRP
1984	Acropora millepora	ITS2	Cladocopium C3	C3		Miall Island	Central Indo-Pacific	Northeast Australian Shelf	Central and Southern GBR	0	3	-23.15	150.9	Direct from Pub	Direct from Pub	SSCP of ITS1, cloning & sequencing	9	2004	3	2005	Jones 2008 ProcRSocB Community change in the endosymbionts of a coral after a bleaching event	ITS1 primers: symITSFP and SymITSRP, novel SSCP profiles were cloned and sequenced		symITSFP and SymITSRP
1985	Acropora millepora	ITS2	Cladocopium C3	C3		Miall Island	Central Indo-Pacific	Northeast Australian Shelf	Central and Southern GBR	0	3	-23.15	150.9	Direct from Pub	Direct from Pub	SSCP of ITS1, cloning & sequencing	9	2004	3	2005	Jones 2008 ProcRSocB Community change in the endosymbionts of a coral after a bleaching event	ITS1 primers: symITSFP and SymITSRP, novel SSCP profiles were cloned and sequenced		symITSFP and SymITSRP
1986	Acropora millepora	ITS2	Cladocopium C3	C3		Miall Island	Central Indo-Pacific	Northeast Australian Shelf	Central and Southern GBR	0	3	-23.15	150.9	Direct from Pub	Direct from Pub	SSCP of ITS1, cloning & sequencing	9	2004	3	2005	Jones 2008 ProcRSocB Community change in the endosymbionts of a coral after a bleaching event	ITS1 primers: symITSFP and SymITSRP, novel SSCP profiles were cloned and sequenced		symITSFP and SymITSRP
1987	Acropora millepora	ITS2	Cladocopium C3	C3		Miall Island	Central Indo-Pacific	Northeast Australian Shelf	Central and Southern GBR	0	3	-23.15	150.9	Direct from Pub	Direct from Pub	SSCP of ITS1, cloning & sequencing	9	2004	3	2005	Jones 2008 ProcRSocB Community change in the endosymbionts of a coral after a bleaching event	ITS1 primers: symITSFP and SymITSRP, novel SSCP profiles were cloned and sequenced		symITSFP and SymITSRP
1988	Acropora millepora	ITS2	Cladocopium C3	C3		Miall Island	Central Indo-Pacific	Northeast Australian Shelf	Central and Southern GBR	0	3	-23.15	150.9	Direct from Pub	Direct from Pub	SSCP of ITS1, cloning & sequencing	9	2004	3	2005	Jones 2008 ProcRSocB Community change in the endosymbionts of a coral after a bleaching event	ITS1 primers: symITSFP and SymITSRP, novel SSCP profiles were cloned and sequenced		symITSFP and SymITSRP
1989	Acropora millepora	ITS2	Cladocopium C3	C3		Miall Island	Central Indo-Pacific	Northeast Australian Shelf	Central and Southern GBR	0	3	-23.15	150.9	Direct from Pub	Direct from Pub	SSCP of ITS1, cloning & sequencing	9	2004	3	2005	Jones 2008 ProcRSocB Community change in the endosymbionts of a coral after a bleaching event	ITS1 primers: symITSFP and SymITSRP, novel SSCP profiles were cloned and sequenced		symITSFP and SymITSRP
1990	Acropora millepora	ITS2	Cladocopium C3	C3		Miall Island	Central Indo-Pacific	Northeast Australian Shelf	Central and Southern GBR	0	3	-23.15	150.9	Direct from Pub	Direct from Pub	SSCP of ITS1, cloning & sequencing	9	2004	3	2005	Jones 2008 ProcRSocB Community change in the endosymbionts of a coral after a bleaching event	ITS1 primers: symITSFP and SymITSRP, novel SSCP profiles were cloned and sequenced		symITSFP and SymITSRP
1991	Acropora millepora	ITS2	Cladocopium C3	C3		Miall Island	Central Indo-Pacific	Northeast Australian Shelf	Central and Southern GBR	0	3	-23.15	150.9	Direct from Pub	Direct from Pub	SSCP of ITS1, cloning & sequencing	9	2004	3	2005	Jones 2008 ProcRSocB Community change in the endosymbionts of a coral after a bleaching event	ITS1 primers: symITSFP and SymITSRP, novel SSCP profiles were cloned and sequenced		symITSFP and SymITSRP
1992	Acropora millepora	ITS2	Cladocopium C3	C3		Miall Island	Central Indo-Pacific	Northeast Australian Shelf	Central and Southern GBR	0	3	-23.15	150.9	Direct from Pub	Direct from Pub	SSCP of ITS1, cloning & sequencing	9	2004	3	2005	Jones 2008 ProcRSocB Community change in the endosymbionts of a coral after a bleaching event	ITS1 primers: symITSFP and SymITSRP, novel SSCP profiles were cloned and sequenced		symITSFP and SymITSRP
1993	Acropora millepora	ITS2	Cladocopium C3	C3		Miall Island	Central Indo-Pacific	Northeast Australian Shelf	Central and Southern GBR	0	3	-23.15	150.9	Direct from Pub	Direct from Pub	SSCP of ITS1, cloning & sequencing	9	2004	3	2005	Jones 2008 ProcRSocB Community change in the endosymbionts of a coral after a bleaching event	ITS1 primers: symITSFP and SymITSRP, novel SSCP profiles were cloned and sequenced		symITSFP and SymITSRP
1994	Acropora millepora	ITS2	Cladocopium C3	C3		Miall Island	Central Indo-Pacific	Northeast Australian Shelf	Central and Southern GBR	0	3	-23.15	150.9	Direct from Pub	Direct from Pub	SSCP of ITS1, cloning & sequencing	9	2004	3	2005	Jones 2008 ProcRSocB Community change in the endosymbionts of a coral after a bleaching event	ITS1 primers: symITSFP and SymITSRP, novel SSCP profiles were cloned and sequenced		symITSFP and SymITSRP
1995	Acropora millepora	ITS2	Cladocopium C3	C3		Miall Island	Central Indo-Pacific	Northeast Australian Shelf	Central and Southern GBR	0	3	-23.15	150.9	Direct from Pub	Direct from Pub	SSCP of ITS1, cloning & sequencing	9	2004	3	2005	Jones 2008 ProcRSocB Community change in the endosymbionts of a coral after a bleaching event	ITS1 primers: symITSFP and SymITSRP, novel SSCP profiles were cloned and sequenced		symITSFP and SymITSRP
1996	Acropora millepora	ITS2	Cladocopium C3	C3		Miall Island	Central Indo-Pacific	Northeast Australian Shelf	Central and Southern GBR	0	3	-23.15	150.9	Direct from Pub	Direct from Pub	SSCP of ITS1, cloning & sequencing	9	2004	3	2005	Jones 2008 ProcRSocB Community change in the endosymbionts of a coral after a bleaching event	ITS1 primers: symITSFP and SymITSRP, novel SSCP profiles were cloned and sequenced		symITSFP and SymITSRP
1997	Acropora millepora	ITS2	Cladocopium C3	C3		Miall Island	Central Indo-Pacific	Northeast Australian Shelf	Central and Southern GBR	0	3	-23.15	150.9	Direct from Pub	Direct from Pub	SSCP of ITS1, cloning & sequencing	9	2004	3	2005	Jones 2008 ProcRSocB Community change in the endosymbionts of a coral after a bleaching event	ITS1 primers: symITSFP and SymITSRP, novel SSCP profiles were cloned and sequenced		symITSFP and SymITSRP
1998	Acropora millepora	ITS2	Cladocopium C3	C3		Miall Island	Central Indo-Pacific	Northeast Australian Shelf	Central and Southern GBR	0	3	-23.15	150.9	Direct from Pub	Direct from Pub	SSCP of ITS1, cloning & sequencing	9	2004	3	2005	Jones 2008 ProcRSocB Community change in the endosymbionts of a coral after a bleaching event	ITS1 primers: symITSFP and SymITSRP, novel SSCP profiles were cloned and sequenced		symITSFP and SymITSRP
1999	Acropora millepora	ITS2	Cladocopium C3	C3		Miall Island	Central Indo-Pacific	Northeast Australian Shelf	Central and Southern GBR	0	3	-23.15	150.9	Direct from Pub	Direct from Pub	SSCP of ITS1, cloning & sequencing	9	2004	3	2005	Jones 2008 ProcRSocB Community change in the endosymbionts of a coral after a bleaching event	ITS1 primers: symITSFP and SymITSRP, novel SSCP profiles were cloned and sequenced		symITSFP and SymITSRP
2000	Acropora millepora	ITS2	Cladocopium C3	C3		Miall Island	Central Indo-Pacific	Northeast Australian Shelf	Central and Southern GBR	0	3	-23.15	150.9	Direct from Pub	Direct from Pub	SSCP of ITS1, cloning & sequencing	9	2004	3	2005	Jones 2008 ProcRSocB Community change in the endosymbionts of a coral after a bleaching event	ITS1 primers: symITSFP and SymITSRP, novel SSCP profiles were cloned and sequenced		symITSFP and SymITSRP
2001	Acropora millepora	ITS2	Cladocopium C3	C3		Miall Island	Central Indo-Pacific	Northeast Australian Shelf	Central and Southern GBR	0	3	-23.15	150.9	Direct from Pub	Direct from Pub	SSCP of ITS1, cloning & sequencing	9	2004	3	2005	Jones 2008 ProcRSocB Community change in the endosymbionts of a coral after a bleaching event	ITS1 primers: symITSFP and SymITSRP, novel SSCP profiles were cloned and sequenced		symITSFP and SymITSRP
2002	Acropora millepora	ITS2	Cladocopium C3	C3		Miall Island	Central Indo-Pacific	Northeast Australian Shelf	Central and Southern GBR	0	3	-23.15	150.9	Direct from Pub	Direct from Pub	SSCP of ITS1, cloning & sequencing	9	2004	3	2005	Jones 2008 ProcRSocB Community change in the endosymbionts of a coral after a bleaching event	ITS1 primers: symITSFP and SymITSRP, novel SSCP profiles were cloned and sequenced		symITSFP and SymITSRP
2003	Acropora millepora	ITS2	Cladocopium C3	C3		Miall Island	Central Indo-Pacific	Northeast Australian Shelf	Central and Southern GBR	0	3	-23.15	150.9	Direct from Pub	Direct from Pub	SSCP of ITS1, cloning & sequencing	9	2004	3	2005	Jones 2008 ProcRSocB Community change in the endosymbionts of a coral after a bleaching event	ITS1 primers: symITSFP and SymITSRP, novel SSCP profiles were cloned and sequenced		symITSFP and SymITSRP
2004	Acropora millepora	ITS2	Cladocopium C3	C3		Miall Island	Central Indo-Pacific	Northeast Australian Shelf	Central and Southern GBR	0	3	-23.15	150.9	Direct from Pub	Direct from Pub	SSCP of ITS1, cloning & sequencing	9	2004	3	2005	Jones 2008 ProcRSocB Community change in the endosymbionts of a coral after a bleaching event	ITS1 primers: symITSFP and SymITSRP, novel SSCP profiles were cloned and sequenced		symITSFP and SymITSRP
2005	Acropora millepora	ITS2	Cladocopium C3	C3		Miall Island	Central Indo-Pacific	Northeast Australian Shelf	Central and Southern GBR	0	3	-23.15	150.9	Direct from Pub	Direct from Pub	SSCP of ITS1, cloning & sequencing	9	2004	3	2005	Jones 2008 ProcRSocB Community change in the endosymbionts of a coral after a bleaching event	ITS1 primers: symITSFP and SymITSRP, novel SSCP profiles were cloned and sequenced		symITSFP and SymITSRP
2006	Acropora millepora	ITS2	Cladocopium C3	C3		Miall Island	Central Indo-Pacific	Northeast Australian Shelf	Central and Southern GBR	0	3	-23.15	150.9	Direct from Pub	Direct from Pub	SSCP of ITS1, cloning & sequencing	9	2004	3	2005	Jones 2008 ProcRSocB Community change in the endosymbionts of a coral after a bleaching event	ITS1 primers: symITSFP and SymITSRP, novel SSCP profiles were cloned and sequenced		symITSFP and SymITSRP
2007	Acropora millepora	ITS2	Cladocopium C3	C3		Miall Island	Central Indo-Pacific	Northeast Australian Shelf	Central and Southern GBR	0	3	-23.15	150.9	Direct from Pub	Direct from Pub	SSCP of ITS1, cloning & sequencing	9	2004	3	2005	Jones 2008 ProcRSocB Community change in the endosymbionts of a coral after a bleaching event	ITS1 primers: symITSFP and SymITSRP, novel SSCP profiles were cloned and sequenced		symITSFP and SymITSRP
2008	Acropora millepora	ITS2	Cladocopium C3	C3		Miall Island	Central Indo-Pacific	Northeast Australian Shelf	Central and Southern GBR	0	3	-23.15	150.9	Direct from Pub	Direct from Pub	SSCP of ITS1, cloning & sequencing	9	2004	3	2005	Jones 2008 ProcRSocB Community change in the endosymbionts of a coral after a bleaching event	ITS1 primers: symITSFP and SymITSRP, novel SSCP profiles were cloned and sequenced		symITSFP and SymITSRP
2009	Acropora millepora	ITS2	Cladocopium C3	C3		Miall Island	Central Indo-Pacific	Northeast Australian Shelf	Central and Southern GBR	0	3	-23.15	150.9	Direct from Pub	Direct from Pub	SSCP of ITS1, cloning & sequencing	9	2004	3	2005	Jones 2008 ProcRSocB Community change in the endosymbionts of a coral after a bleaching event	ITS1 primers: symITSFP and SymITSRP, novel SSCP profiles were cloned and sequenced		symITSFP and SymITSRP
2010	Acropora millepora	ITS2	Cladocopium C3	C3		Miall Island	Central Indo-Pacific	Northeast Australian Shelf	Central and Southern GBR	0	3	-23.15	150.9	Direct from Pub	Direct from Pub	SSCP of ITS1, cloning & sequencing	9	2004	3	2005	Jones 2008 ProcRSocB Community change in the endosymbionts of a coral after a bleaching event	ITS1 primers: symITSFP and SymITSRP, novel SSCP profiles were cloned and sequenced		symITSFP and SymITSRP
2011	Acropora millepora	ITS2	Cladocopium C3	C3		Miall Island	Central Indo-Pacific	Northeast Australian Shelf	Central and Southern GBR	0	3	-23.15	150.9	Direct from Pub	Direct from Pub	SSCP of ITS1, cloning & sequencing	9	2004	3	2005	Jones 2008 ProcRSocB Community change in the endosymbionts of a coral after a bleaching event	ITS1 primers: symITSFP and SymITSRP, novel SSCP profiles were cloned and sequenced		symITSFP and SymITSRP
2012	Acropora millepora	ITS2	Cladocopium C3	C3		Miall Island	Central Indo-Pacific	Northeast Australian Shelf	Central and Southern GBR	0	3	-23.15	150.9	Direct from Pub	Direct from Pub	SSCP of ITS1, cloning & sequencing	9	2004	3	2005	Jones 2008 ProcRSocB Community change in the endosymbionts of a coral after a bleaching event	ITS1 primers: symITSFP and SymITSRP, novel SSCP profiles were cloned and sequenced		symITSFP and SymITSRP
2013	Acropora millepora	ITS2	Cladocopium C3	C3		Miall Island	Central Indo-Pacific	Northeast Australian Shelf	Central and Southern GBR	0	3	-23.15	150.9	Direct from Pub	Direct from Pub	SSCP of ITS1, cloning & sequencing	9	2004	3	2005	Jones 2008 ProcRSocB Community change in the endosymbionts of a coral after a bleaching event	ITS1 primers: symITSFP and SymITSRP, novel SSCP profiles were cloned and sequenced		symITSFP and SymITSRP
2014	Acropora millepora	ITS2	Cladocopium C3	C3		Miall Island	Central Indo-Pacific	Northeast Australian Shelf	Central and Southern GBR	0	3	-23.15	150.9	Direct from Pub	Direct from Pub	SSCP of ITS1, cloning & sequencing	9	2004	3	2005	Jones 2008 ProcRSocB Community change in the endosymbionts of a coral after a bleaching event	ITS1 primers: symITSFP and SymITSRP, novel SSCP profiles were cloned and sequenced		symITSFP and SymITSRP
2015	Acropora millepora	ITS2	Cladocopium C3	C3		Miall Island	Central Indo-Pacific	Northeast Australian Shelf	Central and Southern GBR	0	3	-23.15	150.9	Direct from Pub	Direct from Pub	SSCP of ITS1, cloning & sequencing	9	2004	3	2005	Jones 2008 ProcRSocB Community change in the endosymbionts of a coral after a bleaching event	ITS1 primers: symITSFP and SymITSRP, novel SSCP profiles were cloned and sequenced		symITSFP and SymITSRP
2016	Acropora millepora	ITS2	Cladocopium C3	C3		Miall Island	Central Indo-Pacific	Northeast Australian Shelf	Central and Southern GBR	0	3	-23.15	150.9	Direct from Pub	Direct from Pub	SSCP of ITS1, cloning & sequencing	9	2004	3	2005	Jones 2008 ProcRSocB Community change in the endosymbionts of a coral after a bleaching event	ITS1 primers: symITSFP and SymITSRP, novel SSCP profiles were cloned and sequenced		symITSFP and SymITSRP
2017	Acropora millepora	ITS2	Cladocopium C3	C3		Miall Island	Central Indo-Pacific	Northeast Australian Shelf	Central and Southern GBR	0	3	-23.15	150.9	Direct from Pub	Direct from Pub	SSCP of ITS1, cloning & sequencing	9	2004	3	2005	Jones 2008 ProcRSocB Community change in the endosymbionts of a coral after a bleaching event	ITS1 primers: symITSFP and SymITSRP, novel SSCP profiles were cloned and sequenced		symITSFP and SymITSRP
2018	Acropora millepora	ITS2	Cladocopium C3	C3		Miall Island	Central Indo-Pacific	Northeast Australian Shelf	Central and Southern GBR	0	3	-23.15	150.9	Direct from Pub	Direct from Pub	SSCP of ITS1, cloning & sequencing	9	2004	3	2005	Jones 2008 ProcRSocB Community change in the endosymbionts of a coral after a bleaching event	ITS1 primers: symITSFP and SymITSRP, novel SSCP profiles were cloned and sequenced		symITSFP and SymITSRP
2019	Acropora millepora	ITS2	Cladocopium C3	C3		Miall Island	Central Indo-Pacific	Northeast Australian Shelf	Central and Southern GBR	0	3	-23.15	150.9	Direct from Pub	Direct from Pub	SSCP of ITS1, cloning & sequencing	9	2004	3	2005	Jones 2008 ProcRSocB Community change in the endosymbionts of a coral after a bleaching event	ITS1 primers: symITSFP and SymITSRP, novel SSCP profiles were cloned and sequenced		symITSFP and SymITSRP
2020	Acropora millepora	ITS2	Cladocopium C3	C3		Miall Island	Central Indo-Pacific	Northeast Australian Shelf	Central and Southern GBR	0	3	-23.15	150.9	Direct from Pub	Direct from Pub	SSCP of ITS1, cloning & sequencing	9	2004	3	2005	Jones 2008 ProcRSocB Community change in the endosymbionts of a coral after a bleaching event	ITS1 primers: symITSFP and SymITSRP, novel SSCP profiles were cloned and sequenced		symITSFP and SymITSRP
2021	Acropora millepora	ITS2	Cladocopium C3	C3		Miall Island	Central Indo-Pacific	Northeast Australian Shelf	Central and Southern GBR	0	3	-23.15	150.9	Direct from Pub	Direct from Pub	SSCP of ITS1, cloning & sequencing	9	2004	3	2005	Jones 2008 ProcRSocB Community change in the endosymbionts of a coral after a bleaching event	ITS1 primers: symITSFP and SymITSRP, novel SSCP profiles were cloned and sequenced		symITSFP and SymITSRP
2022	Acropora millepora	ITS2	Cladocopium C3	C3		Miall Island	Central Indo-Pacific	Northeast Australian Shelf	Central and Southern GBR	0	3	-23.15	150.9	Direct from Pub	Direct from Pub	SSCP of ITS1, cloning & sequencing	9	2004	3	2005	Jones 2008 ProcRSocB Community change in the endosymbionts of a coral after a bleaching event	ITS1 primers: symITSFP and SymITSRP, novel SSCP profiles were cloned and sequenced		symITSFP and SymITSRP
2023	Acropora millepora	ITS2	Cladocopium C3	C3		Miall Island	Central Indo-Pacific	Northeast Australian Shelf	Central and Southern GBR	0	3	-23.15	150.9	Direct from Pub	Direct from Pub	SSCP of ITS1, cloning & sequencing	9	2004	3	2005	Jones 2008 ProcRSocB Community change in the endosymbionts of a coral after a bleaching event	ITS1 primers: symITSFP and SymITSRP, novel SSCP profiles were cloned and sequenced		symITSFP and SymITSRP
2024	Acropora millepora	ITS2	Cladocopium C3	C3		Miall Island	Central Indo-Pacific	Northeast Australian Shelf	Central and Southern GBR	0	3	-23.15	150.9	Direct from Pub	Direct from Pub	SSCP of ITS1, cloning & sequencing	9	2004	3	2005	Jones 2008 ProcRSocB Community change in the endosymbionts of a coral after a bleaching event	ITS1 primers: symITSFP and SymITSRP, novel SSCP profiles were cloned and sequenced		symITSFP and SymITSRP
2025	Acropora millepora	ITS2	Cladocopium C3	C3		Miall Island	Central Indo-Pacific	Northeast Australian Shelf	Central and Southern GBR	0	3	-23.15	150.9	Direct from Pub	Direct from Pub	SSCP of ITS1, cloning & sequencing	9	2004	3	2005	Jones 2008 ProcRSocB Community change in the endosymbionts of a coral after a bleaching event	ITS1 primers: symITSFP and SymITSRP, novel SSCP profiles were cloned and sequenced		symITSFP and SymITSRP
2026	Acropora millepora	ITS2	Cladocopium C3	C3		Miall Island	Central Indo-Pacific	Northeast Australian Shelf	Central and Southern GBR	0	3	-23.15	150.9	Direct from Pub	Direct from Pub	SSCP of ITS1, cloning & sequencing	9	2004	3	2005	Jones 2008 ProcRSocB Community change in the endosymbionts of a coral after a bleaching event	ITS1 primers: symITSFP and SymITSRP, novel SSCP profiles were cloned and sequenced		symITSFP and SymITSRP
2027	Acropora millepora	ITS2	Cladocopium C3	C3		Miall Island	Central Indo-Pacific	Northeast Australian Shelf	Central and Southern GBR	0	3	-23.15	150.9	Direct from Pub	Direct from Pub	SSCP of ITS1, cloning & sequencing	9	2004	3	2005	Jones 2008 ProcRSocB Community change in the endosymbionts of a coral after a bleaching event	ITS1 primers: symITSFP and SymITSRP, novel SSCP profiles were cloned and sequenced		symITSFP and SymITSRP
2028	Acropora millepora	ITS2	Cladocopium C3	C3		Miall Island	Central Indo-Pacific	Northeast Australian Shelf	Central and Southern GBR	0	3	-23.15	150.9	Direct from Pub	Direct from Pub	SSCP of ITS1, cloning & sequencing	9	2004	3	2005	Jones 2008 ProcRSocB Community change in the endosymbionts of a coral after a bleaching event	ITS1 primers: symITSFP and SymITSRP, novel SSCP profiles were cloned and sequenced		symITSFP and SymITSRP
2029	Acropora millepora	ITS2	Cladocopium C3	C3		Miall Island	Central Indo-Pacific	Northeast Australian Shelf	Central and Southern GBR	0	3	-23.15	150.9	Direct from Pub	Direct from Pub	SSCP of ITS1, cloning & sequencing	9	2004	3	2005	Jones 2008 ProcRSocB Community change in the endosymbionts of a coral after a bleaching event	ITS1 primers: symITSFP and SymITSRP, novel SSCP profiles were cloned and sequenced		symITSFP and SymITSRP
2030	Acropora millepora	ITS2	Cladocopium C3	C3		Miall Island	Central Indo-Pacific	Northeast Australian Shelf	Central and Southern GBR	0	3	-23.15	150.9	Direct from Pub	Direct from Pub	SSCP of ITS1, cloning & sequencing	9	2004	3	2005	Jones 2008 ProcRSocB Community change in the endosymbionts of a coral after a bleaching event	ITS1 primers: symITSFP and SymITSRP, novel SSCP profiles were cloned and sequenced		symITSFP and SymITSRP
2031	Acropora millepora	ITS2	Cladocopium C3	C3		Miall Island	Central Indo-Pacific	Northeast Australian Shelf	Central and Southern GBR	0	3	-23.15	150.9	Direct from Pub	Direct from Pub	SSCP of ITS1, cloning & sequencing	9	2004	3	2005	Jones 2008 ProcRSocB Community change in the endosymbionts of a coral after a bleaching event	ITS1 primers: symITSFP and SymITSRP, novel SSCP profiles were cloned and sequenced		symITSFP and SymITSRP
2032	Acropora millepora	ITS2	Cladocopium C3	C3		Miall Island	Central Indo-Pacific	Northeast Australian Shelf	Central and Southern GBR	0	3	-23.15	150.9	Direct from Pub	Direct from Pub	SSCP of ITS1, cloning & sequencing	9	2004	3	2005	Jones 2008 ProcRSocB Community change in the endosymbionts of a coral after a bleaching event	ITS1 primers: symITSFP and SymITSRP, novel SSCP profiles were cloned and sequenced		symITSFP and SymITSRP
2033	Acropora millepora	ITS2	Cladocopium C3	C3		Miall Island	Central Indo-Pacific	Northeast Australian Shelf	Central and Southern GBR	0	3	-23.15	150.9	Direct from Pub	Direct from Pub	SSCP of ITS1, cloning & sequencing	9	2004	3	2005	Jones 2008 ProcRSocB Community change in the endosymbionts of a coral after a bleaching event	ITS1 primers: symITSFP and SymITSRP, novel SSCP profiles were cloned and sequenced		symITSFP and SymITSRP
2034	Acropora millepora	ITS2	Cladocopium C3	C3		Miall Island	Central Indo-Pacific	Northeast Australian Shelf	Central and Southern GBR	0	3	-23.15	150.9	Direct from Pub	Direct from Pub	SSCP of ITS1, cloning & sequencing	9	2004	3	2005	Jones 2008 ProcRSocB Community change in the endosymbionts of a coral after a bleaching event	ITS1 primers: symITSFP and SymITSRP, novel SSCP profiles were cloned and sequenced		symITSFP and SymITSRP
2035	Acropora millepora	ITS2	Cladocopium C3	C3		Miall Island	Central Indo-Pacific	Northeast Australian Shelf	Central and Southern GBR	0	3	-23.15	150.9	Direct from Pub	Direct from Pub	SSCP of ITS1, cloning & sequencing	9	2004	3	2005	Jones 2008 ProcRSocB Community change in the endosymbionts of a coral after a bleaching event	ITS1 primers: symITSFP and SymITSRP, novel SSCP profiles were cloned and sequenced		symITSFP and SymITSRP
2036	Acropora millepora	ITS2	Cladocopium C3	C3		Miall Island	Central Indo-Pacific	Northeast Australian Shelf	Central and Southern GBR	0	3	-23.15	150.9	Direct from Pub	Direct from Pub	SSCP of ITS1, cloning & sequencing	9	2004	3	2005	Jones 2008 ProcRSocB Community change in the endosymbionts of a coral after a bleaching event	ITS1 primers: symITSFP and SymITSRP, novel SSCP profiles were cloned and sequenced		symITSFP and SymITSRP
2037	Acropora millepora	ITS2	Cladocopium C3	C3		Miall Island	Central Indo-Pacific	Northeast Australian Shelf	Central and Southern GBR	0	3	-23.15	150.9	Direct from Pub	Direct from Pub	SSCP of ITS1, cloning & sequencing	9	2004	3	2005	Jones 2008 ProcRSocB Community change in the endosymbionts of a coral after a bleaching event	ITS1 primers: symITSFP and SymITSRP, novel SSCP profiles were cloned and sequenced		symITSFP and SymITSRP
2038	Acropora millepora	ITS2	Cladocopium C3	C3		Miall Island	Central Indo-Pacific	Northeast Australian Shelf	Central and Southern GBR	0	3	-23.15	150.9	Direct from Pub	Direct from Pub	SSCP of ITS1, cloning & sequencing	9	2004	3	2005	Jones 2008 ProcRSocB Community change in the endosymbionts of a coral after a bleaching event	ITS1 primers: symITSFP and SymITSRP, novel SSCP profiles were cloned and sequenced		symITSFP and SymITSRP
2039	Acropora millepora	ITS2	Cladocopium C3	C3		Miall Island	Central Indo-Pacific	Northeast Australian Shelf	Central and Southern GBR	0	3	-23.15	150.9	Direct from Pub	Direct from Pub	SSCP of ITS1, cloning & sequencing	9	2004	3	2005	Jones 2008 ProcRSocB Community change in the endosymbionts of a coral after a bleaching event	ITS1 primers: symITSFP and SymITSRP, novel SSCP profiles were cloned and sequenced		symITSFP and SymITSRP
2040	Acropora millepora	ITS2	Cladocopium C3	C3		Miall Island	Central Indo-Pacific	Northeast Australian Shelf	Central and Southern GBR	0	3	-23.15	150.9	Direct from Pub	Direct from Pub	SSCP of ITS1, cloning & sequencing	9	2004	3	2005	Jones 2008 ProcRSocB Community change in the endosymbionts of a coral after a bleaching event	ITS1 primers: symITSFP and SymITSRP, novel SSCP profiles were cloned and sequenced		symITSFP and SymITSRP
2041	Acropora millepora	ITS2	Cladocopium C3	C3		Miall Island	Central Indo-Pacific	Northeast Australian Shelf	Central and Southern GBR	0	3	-23.15	150.9	Direct from Pub	Direct from Pub	SSCP of ITS1, cloning & sequencing	9	2004	3	2005	Jones 2008 ProcRSocB Community change in the endosymbionts of a coral after a bleaching event	ITS1 primers: symITSFP and SymITSRP, novel SSCP profiles were cloned and sequenced		symITSFP and SymITSRP
2042	Acropora millepora	ITS2	Cladocopium C3	C3		Miall Island	Central Indo-Pacific	Northeast Australian Shelf	Central and Southern GBR	0	3	-23.15	150.9	Direct from Pub	Direct from Pub	SSCP of ITS1, cloning & sequencing	9	2004	3	2005	Jones 2008 ProcRSocB Community change in the endosymbionts of a coral after a bleaching event	ITS1 primers: symITSFP and SymITSRP, novel SSCP profiles were cloned and sequenced		symITSFP and SymITSRP
2043	Acropora millepora	ITS2	Cladocopium C3	C3		Miall Island	Central Indo-Pacific	Northeast Australian Shelf	Central and Southern GBR	0	3	-23.15	150.9	Direct from Pub	Direct from Pub	SSCP of ITS1, cloning & sequencing	9	2004	3	2005	Jones 2008 ProcRSocB Community change in the endosymbionts of a coral after a bleaching event	ITS1 primers: symITSFP and SymITSRP, novel SSCP profiles were cloned and sequenced		symITSFP and SymITSRP
2044	Acropora millepora	ITS2	Cladocopium C3	C3		Miall Island	Central Indo-Pacific	Northeast Australian Shelf	Central and Southern GBR	0	3	-23.15	150.9	Direct from Pub	Direct from Pub	SSCP of ITS1, cloning & sequencing	9	2004	3	2005	Jones 2008 ProcRSocB Community change in the endosymbionts of a coral after a bleaching event	ITS1 primers: symITSFP and SymITSRP, novel SSCP profiles were cloned and sequenced		symITSFP and SymITSRP
2045	Acropora millepora	ITS2	Cladocopium C3	C3		Miall Island	Central Indo-Pacific	Northeast Australian Shelf	Central and Southern GBR	0	3	-23.15	150.9	Direct from Pub	Direct from Pub	SSCP of ITS1, cloning & sequencing	9	2004	3	2005	Jones 2008 ProcRSocB Community change in the endosymbionts of a coral after a bleaching event	ITS1 primers: symITSFP and SymITSRP, novel SSCP profiles were cloned and sequenced		symITSFP and SymITSRP
2046	Acropora millepora	ITS2	Cladocopium C3	C3		Miall Island	Central Indo-Pacific	Northeast Australian Shelf	Central and Southern GBR	0	3	-23.15	150.9	Direct from Pub	Direct from Pub	SSCP of ITS1, cloning & sequencing	9	2004	3	2005	Jones 2008 ProcRSocB Community change in the endosymbionts of a coral after a bleaching event	ITS1 primers: symITSFP and SymITSRP, novel SSCP profiles were cloned and sequenced		symITSFP and SymITSRP
2047	Acropora millepora	ITS2	Cladocopium C3	C3		Miall Island	Central Indo-Pacific	Northeast Australian Shelf	Central and Southern GBR	0	3	-23.15	150.9	Direct from Pub	Direct from Pub	SSCP of ITS1, cloning & sequencing	9	2004	3	2005	Jones 2008 ProcRSocB Community change in the endosymbionts of a coral after a bleaching event	ITS1 primers: symITSFP and SymITSRP, novel SSCP profiles were cloned and sequenced		symITSFP and SymITSRP
2048	Acropora millepora	ITS2	Cladocopium C3	C3		Miall Island	Central Indo-Pacific	Northeast Australian Shelf	Central and Southern GBR	0	3	-23.15	150.9	Direct from Pub	Direct from Pub	SSCP of ITS1, cloning & sequencing	9	2004	3	2005	Jones 2008 ProcRSocB Community change in the endosymbionts of a coral after a bleaching event	ITS1 primers: symITSFP and SymITSRP, novel SSCP profiles were cloned and sequenced		symITSFP and SymITSRP
2049	Acropora millepora	ITS2	Cladocopium C3	C3		Miall Island	Central Indo-Pacific	Northeast Australian Shelf	Central and Southern GBR	0	3	-23.15	150.9	Direct from Pub	Direct from Pub	SSCP of ITS1, cloning & sequencing	9	2004	3	2005	Jones 2008 ProcRSocB Community change in the endosymbionts of a coral after a bleaching event	ITS1 primers: symITSFP and SymITSRP, novel SSCP profiles were cloned and sequenced		symITSFP and SymITSRP
2050	Acropora millepora	ITS2	Cladocopium C3	C3		Miall Island	Central Indo-Pacific	Northeast Australian Shelf	Central and Southern GBR	0	3	-23.15	150.9	Direct from Pub	Direct from Pub	SSCP of ITS1, cloning & sequencing	9	2004	3	2005	Jones 2008 ProcRSocB Community change in the endosymbionts of a coral after a bleaching event	ITS1 primers: symITSFP and SymITSRP, novel SSCP profiles were cloned and sequenced		symITSFP and SymITSRP
2051	Acropora millepora	ITS2	Cladocopium C3	C3		Miall Island	Central Indo-Pacific	Northeast Australian Shelf	Central and Southern GBR	0	3	-23.15	150.9	Direct from Pub	Direct from Pub	SSCP of ITS1, cloning & sequencing	9	2004	3	2005	Jones 2008 ProcRSocB Community change in the endosymbionts of a coral after a bleaching event	ITS1 primers: symITSFP and SymITSRP, novel SSCP profiles were cloned and sequenced		symITSFP and SymITSRP
2052	Acropora millepora	ITS2	Cladocopium C3	C3		Miall Island	Central Indo-Pacific	Northeast Australian Shelf	Central and Southern GBR	0	3	-23.15	150.9	Direct from Pub	Direct from Pub	SSCP of ITS1, cloning & sequencing	9	2004	3	2005	Jones 2008 ProcRSocB Community change in the endosymbionts of a coral after a bleaching event	ITS1 primers: symITSFP and SymITSRP, novel SSCP profiles were cloned and sequenced		symITSFP and SymITSRP
2053	Acropora millepora	ITS2	Cladocopium C3	C3		Miall Island	Central Indo-Pacific	Northeast Australian Shelf	Central and Southern GBR	0	3	-23.15	150.9	Direct from Pub	Direct from Pub	SSCP of ITS1, cloning & sequencing	9	2004	3	2005	Jones 2008 ProcRSocB Community change in the endosymbionts of a coral after a bleaching event	ITS1 primers: symITSFP and SymITSRP, novel SSCP profiles were cloned and sequenced		symITSFP and SymITSRP
2054	Acropora millepora	ITS2	Cladocopium C3	C3		Miall Island	Central Indo-Pacific	Northeast Australian Shelf	Central and Southern GBR	0	3	-23.15	150.9	Direct from Pub	Direct from Pub	SSCP of ITS1, cloning & sequencing	9	2004	3	2005	Jones 2008 ProcRSocB Community change in the endosymbionts of a coral after a bleaching event	ITS1 primers: symITSFP and SymITSRP, novel SSCP profiles were cloned and sequenced		symITSFP and SymITSRP
2055	Acropora millepora	ITS2	Cladocopium C3	C3		Miall Island	Central Indo-Pacific	Northeast Australian Shelf	Central and Southern GBR	0	3	-23.15	150.9	Direct from Pub	Direct from Pub	SSCP of ITS1, cloning & sequencing	9	2004	3	2005	Jones 2008 ProcRSocB Community change in the endosymbionts of a coral after a bleaching event	ITS1 primers: symITSFP and SymITSRP, novel SSCP profiles were cloned and sequenced		symITSFP and SymITSRP
2056	Acropora millepora	ITS2	Cladocopium C3	C3		Miall Island	Central Indo-Pacific	Northeast Australian Shelf	Central and Southern GBR	0	3	-23.15	150.9	Direct from Pub	Direct from Pub	SSCP of ITS1, cloning & sequencing	9	2004	3	2005	Jones 2008 ProcRSocB Community change in the endosymbionts of a coral after a bleaching event	ITS1 primers: symITSFP and SymITSRP, novel SSCP profiles were cloned and sequenced		symITSFP and SymITSRP
2057	Acropora millepora	ITS2	Cladocopium C3	C3		Miall Island	Central Indo-Pacific	Northeast Australian Shelf	Central and Southern GBR	0	3	-23.15	150.9	Direct from Pub	Direct from Pub	SSCP of ITS1, cloning & sequencing	9	2004	3	2005	Jones 2008 ProcRSocB Community change in the endosymbionts of a coral after a bleaching event	ITS1 primers: symITSFP and SymITSRP, novel SSCP profiles were cloned and sequenced		symITSFP and SymITSRP
2058	Acropora millepora	ITS2	Cladocopium C3	C3		Miall Island	Central Indo-Pacific	Northeast Australian Shelf	Central and Southern GBR	0	3	-23.15	150.9	Direct from Pub	Direct from Pub	SSCP of ITS1, cloning & sequencing	9	2004	3	2005	Jones 2008 ProcRSocB Community change in the endosymbionts of a coral after a bleaching event	ITS1 primers: symITSFP and SymITSRP, novel SSCP profiles were cloned and sequenced		symITSFP and SymITSRP
2059	Acropora millepora	ITS2	Cladocopium C3	C3		Miall Island	Central Indo-Pacific	Northeast Australian Shelf	Central and Southern GBR	0	3	-23.15	150.9	Direct from Pub	Direct from Pub	SSCP of ITS1, cloning & sequencing	9	2004	3	2005	Jones 2008 ProcRSocB Community change in the endosymbionts of a coral after a bleaching event	ITS1 primers: symITSFP and SymITSRP, novel SSCP profiles were cloned and sequenced		symITSFP and SymITSRP
2060	Acropora millepora	ITS2	Cladocopium C3	C3		Miall Island	Central Indo-Pacific	Northeast Australian Shelf	Central and Southern GBR	0	3	-23.15	150.9	Direct from Pub	Direct from Pub	SSCP of ITS1, cloning & sequencing	9	2004	3	2005	Jones 2008 ProcRSocB Community change in the endosymbionts of a coral after a bleaching event	ITS1 primers: symITSFP and SymITSRP, novel SSCP profiles were cloned and sequenced		symITSFP and SymITSRP
2061	Acropora millepora	ITS2	Cladocopium C3	C3		Miall Island	Central Indo-Pacific	Northeast Australian Shelf	Central and Southern GBR	0	3	-23.15	150.9	Direct from Pub	Direct from Pub	SSCP of ITS1, cloning & sequencing	9	2004	3	2005	Jones 2008 ProcRSocB Community change in the endosymbionts of a coral after a bleaching event	ITS1 primers: symITSFP and SymITSRP, novel SSCP profiles were cloned and sequenced		symITSFP and SymITSRP
2062	Acropora millepora	ITS2	Cladocopium C3	C3		Miall Island	Central Indo-Pacific	Northeast Australian Shelf	Central and Southern GBR	0	3	-23.15	150.9	Direct from Pub	Direct from Pub	SSCP of ITS1, cloning & sequencing	9	2004	3	2005	Jones 2008 ProcRSocB Community change in the endosymbionts of a coral after a bleaching event	ITS1 primers: symITSFP and SymITSRP, novel SSCP profiles were cloned and sequenced		symITSFP and SymITSRP
2063	Acropora millepora	ITS2	Cladocopium C3	C3		Miall Island	Central Indo-Pacific	Northeast Australian Shelf	Central and Southern GBR	0	3	-23.15	150.9	Direct from Pub	Direct from Pub	SSCP of ITS1, cloning & sequencing	9	2004	3	2005	Jones 2008 ProcRSocB Community change in the endosymbionts of a coral after a bleaching event	ITS1 primers: symITSFP and SymITSRP, novel SSCP profiles were cloned and sequenced		symITSFP and SymITSRP
2064	Acropora millepora	ITS2	Cladocopium C3	C3		Miall Island	Central Indo-Pacific	Northeast Australian Shelf	Central and Southern GBR	0	3	-23.15	150.9	Direct from Pub	Direct from Pub	SSCP of ITS1, cloning & sequencing	9	2004	3	2005	Jones 2008 ProcRSocB Community change in the endosymbionts of a coral after a bleaching event	ITS1 primers: symITSFP and SymITSRP, novel SSCP profiles were cloned and sequenced		symITSFP and SymITSRP
2065	Acropora millepora	ITS2	Cladocopium C3	C3		Miall Island	Central Indo-Pacific	Northeast Australian Shelf	Central and Southern GBR	0	3	-23.15	150.9	Direct from Pub	Direct from Pub	SSCP of ITS1, cloning & sequencing	9	2004	3	2005	Jones 2008 ProcRSocB Community change in the endosymbionts of a coral after a bleaching event	ITS1 primers: symITSFP and SymITSRP, novel SSCP profiles were cloned and sequenced		symITSFP and SymITSRP
2066	Acropora millepora	ITS2	Cladocopium C3	C3		Miall Island	Central Indo-Pacific	Northeast Australian Shelf	Central and Southern GBR	0	3	-23.15	150.9	Direct from Pub	Direct from Pub	SSCP of ITS1, cloning & sequencing	9	2004	3	2005	Jones 2008 ProcRSocB Community change in the endosymbionts of a coral after a bleaching event	ITS1 primers: symITSFP and SymITSRP, novel SSCP profiles were cloned and sequenced		symITSFP and SymITSRP
2067	Acropora millepora	ITS2	Cladocopium C3	C3		Miall Island	Central Indo-Pacific	Northeast Australian Shelf	Central and Southern GBR	0	3	-23.15	150.9	Direct from Pub	Direct from Pub	SSCP of ITS1, cloning & sequencing	9	2004	3	2005	Jones 2008 ProcRSocB Community change in the endosymbionts of a coral after a bleaching event	ITS1 primers: symITSFP and SymITSRP, novel SSCP profiles were cloned and sequenced		symITSFP and SymITSRP
2068	Acropora millepora	ITS2	Cladocopium C3	C3		Miall Island	Central Indo-Pacific	Northeast Australian Shelf	Central and Southern GBR	0	3	-23.15	150.9	Direct from Pub	Direct from Pub	SSCP of ITS1, cloning & sequencing	9	2004	3	2005	Jones 2008 ProcRSocB Community change in the endosymbionts of a coral after a bleaching event	ITS1 primers: symITSFP and SymITSRP, novel SSCP profiles were cloned and sequenced		symITSFP and SymITSRP
2069	Acropora millepora	ITS2	Cladocopium C3	C3		Miall Island	Central Indo-Pacific	Northeast Australian Shelf	Central and Southern GBR	0	3	-23.15	150.9	Direct from Pub	Direct from Pub	SSCP of ITS1, cloning & sequencing	9	2004	3	2005	Jones 2008 ProcRSocB Community change in the endosymbionts of a coral after a bleaching event	ITS1 primers: symITSFP and SymITSRP, novel SSCP profiles were cloned and sequenced		symITSFP and SymITSRP
2070	Acropora millepora	ITS2	Cladocopium C3	C3		Miall Island	Central Indo-Pacific	Northeast Australian Shelf	Central and Southern GBR	0	3	-23.15	150.9	Direct from Pub	Direct from Pub	SSCP of ITS1, cloning & sequencing	9	2004	3	2005	Jones 2008 ProcRSocB Community change in the endosymbionts of a coral after a bleaching event	ITS1 primers: symITSFP and SymITSRP, novel SSCP profiles were cloned and sequenced		symITSFP and SymITSRP
2071	Acropora millepora	ITS2	Cladocopium C3	C3		Miall Island	Central Indo-Pacific	Northeast Australian Shelf	Central and Southern GBR	0	3	-23.15	150.9	Direct from Pub	Direct from Pub	SSCP of ITS1, cloning & sequencing	9	2004	3	2005	Jones 2008 ProcRSocB Community change in the endosymbionts of a coral after a bleaching event	ITS1 primers: symITSFP and SymITSRP, novel SSCP profiles were cloned and sequenced		symITSFP and SymITSRP
2072	Acropora millepora	ITS2	Cladocopium C3	C3		Miall Island	Central Indo-Pacific	Northeast Australian Shelf	Central and Southern GBR	0	3	-23.15	150.9	Direct from Pub	Direct from Pub	SSCP of ITS1, cloning & sequencing	9	2004	3	2005	Jones 2008 ProcRSocB Community change in the endosymbionts of a coral after a bleaching event	ITS1 primers: symITSFP and SymITSRP, novel SSCP profiles were cloned and sequenced		symITSFP and SymITSRP
2073	Acropora millepora	ITS2	Cladocopium C3	C3		Miall Island	Central Indo-Pacific	Northeast Australian Shelf	Central and Southern GBR	0	3	-23.15	150.9	Direct from Pub	Direct from Pub	SSCP of ITS1, cloning & sequencing	9	2004	3	2005	Jones 2008 ProcRSocB Community change in the endosymbionts of a coral after a bleaching event	ITS1 primers: symITSFP and SymITSRP, novel SSCP profiles were cloned and sequenced		symITSFP and SymITSRP
2074	Acropora millepora	ITS2	Cladocopium C3	C3		Miall Island	Central Indo-Pacific	Northeast Australian Shelf	Central and Southern GBR	0	3	-23.15	150.9	Direct from Pub	Direct from Pub	SSCP of ITS1, cloning & sequencing	9	2004	3	2005	Jones 2008 ProcRSocB Community change in the endosymbionts of a coral after a bleaching event	ITS1 primers: symITSFP and SymITSRP, novel SSCP profiles were cloned and sequenced		symITSFP and SymITSRP
2075	Acropora millepora	ITS2	Cladocopium C3	C3		Miall Island	Central Indo-Pacific	Northeast Australian Shelf	Central and Southern GBR	0	3	-23.15	150.9	Direct from Pub	Direct from Pub	SSCP of ITS1, cloning & sequencing	9	2004	3	2005	Jones 2008 ProcRSocB Community change in the endosymbionts of a coral after a bleaching event	ITS1 primers: symITSFP and SymITSRP, novel SSCP profiles were cloned and sequenced		symITSFP and SymITSRP
2076	Acropora millepora	ITS2	Cladocopium C3	C3		Miall Island	Central Indo-Pacific	Northeast Australian Shelf	Central and Southern GBR	0	3	-23.15	150.9	Direct from Pub	Direct from Pub	SSCP of ITS1, cloning & sequencing	9	2004	3	2005	Jones 2008 ProcRSocB Community change in the endosymbionts of a coral after a bleaching event	ITS1 primers: symITSFP and SymITSRP, novel SSCP profiles were cloned and sequenced		symITSFP and SymITSRP
2077	Acropora millepora	ITS2	Cladocopium C3	C3		Miall Island	Central Indo-Pacific	Northeast Australian Shelf	Central and Southern GBR	0	3	-23.15	150.9	Direct from Pub	Direct from Pub	SSCP of ITS1, cloning & sequencing	9	2004	3	2005	Jones 2008 ProcRSocB Community change in the endosymbionts of a coral after a bleaching event	ITS1 primers: symITSFP and SymITSRP, novel SSCP profiles were cloned and sequenced		symITSFP and SymITSRP
2078	Acropora millepora	ITS2	Cladocopium C3	C3		Miall Island	Central Indo-Pacific	Northeast Australian Shelf	Central and Southern GBR	0	3	-23.15	150.9	Direct from Pub	Direct from Pub	SSCP of ITS1, cloning & sequencing	9	2004	3	2005	Jones 2008 ProcRSocB Community change in the endosymbionts of a coral after a bleaching event	ITS1 primers: symITSFP and SymITSRP, novel SSCP profiles were cloned and sequenced		symITSFP and SymITSRP
2079	Acropora millepora	ITS2	Cladocopium C3	C3		Miall Island	Central Indo-Pacific	Northeast Australian Shelf	Central and Southern GBR	0	3	-23.15	150.9	Direct from Pub	Direct from Pub	SSCP of ITS1, cloning & sequencing	9	2004	3	2005	Jones 2008 ProcRSocB Community change in the endosymbionts of a coral after a bleaching event	ITS1 primers: symITSFP and SymITSRP, novel SSCP profiles were cloned and sequenced		symITSFP and SymITSRP
2080	Acropora millepora	ITS2	Cladocopium C3	C3		Miall Island	Central Indo-Pacific	Northeast Australian Shelf	Central and Southern GBR	0	3	-23.15	150.9	Direct from Pub	Direct from Pub	SSCP of ITS1, cloning & sequencing	9	2004	3	2005	Jones 2008 ProcRSocB Community change in the endosymbionts of a coral after a bleaching event	ITS1 primers: symITSFP and SymITSRP, novel SSCP profiles were cloned and sequenced		symITSFP and SymITSRP
2081	Acropora millepora	ITS2	Cladocopium C3	C3		Miall Island	Central Indo-Pacific	Northeast Australian Shelf	Central and Southern GBR	0	3	-23.15	150.9	Direct from Pub	Direct from Pub	SSCP of ITS1, cloning & sequencing	9	2004	3	2005	Jones 2008 ProcRSocB Community change in the endosymbionts of a coral after a bleaching event	ITS1 primers: symITSFP and SymITSRP, novel SSCP profiles were cloned and sequenced		symITSFP and SymITSRP
2082	Acropora millepora	ITS2	Cladocopium C3	C3		Miall Island	Central Indo-Pacific	Northeast Australian Shelf	Central and Southern GBR	0	3	-23.15	150.9	Direct from Pub	Direct from Pub	SSCP of ITS1, cloning & sequencing	9	2004	3	2005	Jones 2008 ProcRSocB Community change in the endosymbionts of a coral after a bleaching event	ITS1 primers: symITSFP and SymITSRP, novel SSCP profiles were cloned and sequenced		symITSFP and SymITSRP
2083	Acropora millepora	ITS2	Cladocopium C3	C3		Miall Island	Central Indo-Pacific	Northeast Australian Shelf	Central and Southern GBR	0	3	-23.15	150.9	Direct from Pub	Direct from Pub	SSCP of ITS1, cloning & sequencing	9	2004	3	2005	Jones 2008 ProcRSocB Community change in the endosymbionts of a coral after a bleaching event	ITS1 primers: symITSFP and SymITSRP, novel SSCP profiles were cloned and sequenced		symITSFP and SymITSRP
2084	Acropora millepora	ITS2	Cladocopium C3	C3		Miall Island	Central Indo-Pacific	Northeast Australian Shelf	Central and Southern GBR	0	3	-23.15	150.9	Direct from Pub	Direct from Pub	SSCP of ITS1, cloning & sequencing	9	2004	3	2005	Jones 2008 ProcRSocB Community change in the endosymbionts of a coral after a bleaching event	ITS1 primers: symITSFP and SymITSRP, novel SSCP profiles were cloned and sequenced		symITSFP and SymITSRP
2085	Acropora millepora	ITS2	Cladocopium C3	C3		Miall Island	Central Indo-Pacific	Northeast Australian Shelf	Central and Southern GBR	0	3	-23.15	150.9	Direct from Pub	Direct from Pub	SSCP of ITS1, cloning & sequencing	9	2004	3	2005	Jones 2008 ProcRSocB Community change in the endosymbionts of a coral after a bleaching event	ITS1 primers: symITSFP and SymITSRP, novel SSCP profiles were cloned and sequenced		symITSFP and SymITSRP
2086	Acropora millepora	ITS2	Cladocopium C3	C3		Miall Island	Central Indo-Pacific	Northeast Australian Shelf	Central and Southern GBR	0	3	-23.15	150.9	Direct from Pub	Direct from Pub	SSCP of ITS1, cloning & sequencing	9	2004	3	2005	Jones 2008 ProcRSocB Community change in the endosymbionts of a coral after a bleaching event	ITS1 primers: symITSFP and SymITSRP, novel SSCP profiles were cloned and sequenced		symITSFP and SymITSRP
2087	Acropora millepora	ITS2	Cladocopium C3	C3		Miall Island	Central Indo-Pacific	Northeast Australian Shelf	Central and Southern GBR	0	3	-23.15	150.9	Direct from Pub	Direct from Pub	SSCP of ITS1, cloning & sequencing	9	2004	3	2005	Jones 2008 ProcRSocB Community change in the endosymbionts of a coral after a bleaching event	ITS1 primers: symITSFP and SymITSRP, novel SSCP profiles were cloned and sequenced		symITSFP and SymITSRP
2088	Acropora millepora	ITS2	Cladocopium C3	C3		Miall Island	Central Indo-Pacific	Northeast Australian Shelf	Central and Southern GBR	0	3	-23.15	150.9	Direct from Pub	Direct from Pub	SSCP of ITS1, cloning & sequencing	9	2004	3	2005	Jones 2008 ProcRSocB Community change in the endosymbionts of a coral after a bleaching event	ITS1 primers: symITSFP and SymITSRP, novel SSCP profiles were cloned and sequenced		symITSFP and SymITSRP
2089	Acropora millepora	ITS2	Cladocopium C3	C3		Miall Island	Central Indo-Pacific	Northeast Australian Shelf	Central and Southern GBR	0	3	-23.15	150.9	Direct from Pub	Direct from Pub	SSCP of ITS1, cloning & sequencing	9	2004	3	2005	Jones 2008 ProcRSocB Community change in the endosymbionts of a coral after a bleaching event	ITS1 primers: symITSFP and SymITSRP, novel SSCP profiles were cloned and sequenced		symITSFP and SymITSRP
2090	Acropora millepora	ITS2	Cladocopium C3	C3		Miall Island	Central Indo-Pacific	Northeast Australian Shelf	Central and Southern GBR	0	3	-23.15	150.9	Direct from Pub	Direct from Pub	SSCP of ITS1, cloning & sequencing	9	2004	3	2005	Jones 2008 ProcRSocB Community change in the endosymbionts of a coral after a bleaching event	ITS1 primers: symITSFP and SymITSRP, novel SSCP profiles were cloned and sequenced		symITSFP and SymITSRP
2091	Acropora millepora	ITS2	Cladocopium C3	C3		Miall Island	Central Indo-Pacific	Northeast Australian Shelf	Central and Southern GBR	0	3	-23.15	150.9	Direct from Pub	Direct from Pub	SSCP of ITS1, cloning & sequencing	9	2004	3	2005	Jones 2008 ProcRSocB Community change in the endosymbionts of a coral after a bleaching event	ITS1 primers: symITSFP and SymITSRP, novel SSCP profiles were cloned and sequenced		symITSFP and SymITSRP
2092	Acropora millepora	ITS2	Cladocopium C3	C3		Miall Island	Central Indo-Pacific	Northeast Australian Shelf	Central and Southern GBR	0	3	-23.15	150.9	Direct from Pub	Direct from Pub	SSCP of ITS1, cloning & sequencing	9	2004	3	2005	Jones 2008 ProcRSocB Community change in the endosymbionts of a coral after a bleaching event	ITS1 primers: symITSFP and SymITSRP, novel SSCP profiles were cloned and sequenced		symITSFP and SymITSRP
2093	Acropora millepora	ITS2	Cladocopium C3	C3		Miall Island	Central Indo-Pacific	Northeast Australian Shelf	Central and Southern GBR	0	3	-23.15	150.9	Direct from Pub	Direct from Pub	SSCP of ITS1, cloning & sequencing	9	2004	3	2005	Jones 2008 ProcRSocB Community change in the endosymbionts of a coral after a bleaching event	ITS1 primers: symITSFP and SymITSRP, novel SSCP profiles were cloned and sequenced		symITSFP and SymITSRP
2094	Acropora millepora	ITS2	Cladocopium C3	C3		Miall Island	Central Indo-Pacific	Northeast Australian Shelf	Central and Southern GBR	0	3	-23.15	150.9	Direct from Pub	Direct from Pub	SSCP of ITS1, cloning & sequencing	9	2004	3	2005	Jones 2008 ProcRSocB Community change in the endosymbionts of a coral after a bleaching event	ITS1 primers: symITSFP and SymITSRP, novel SSCP profiles were cloned and sequenced		symITSFP and SymITSRP
2095	Acropora millepora	ITS2	Cladocopium C3	C3		Miall Island	Central Indo-Pacific	Northeast Australian Shelf	Central and Southern GBR	0	3	-23.15	150.9	Direct from Pub	Direct from Pub	SSCP of ITS1, cloning & sequencing	9	2004	3	2005	Jones 2008 ProcRSocB Community change in the endosymbionts of a coral after a bleaching event	ITS1 primers: symITSFP and SymITSRP, novel SSCP profiles were cloned and sequenced		symITSFP and SymITSRP
2096	Acropora millepora	ITS2	Cladocopium C3	C3		Miall Island	Central Indo-Pacific	Northeast Australian Shelf	Central and Southern GBR	0	3	-23.15	150.9	Direct from Pub	Direct from Pub	SSCP of ITS1, cloning & sequencing	9	2004	3	2005	Jones 2008 ProcRSocB Community change in the endosymbionts of a coral after a bleaching event	ITS1 primers: symITSFP and SymITSRP, novel SSCP profiles were cloned and sequenced		symITSFP and SymITSRP
2097	Acropora millepora	ITS2	Cladocopium C3	C3		Miall Island	Central Indo-Pacific	Northeast Australian Shelf	Central and Southern GBR	0	3	-23.15	150.9	Direct from Pub	Direct from Pub	SSCP of ITS1, cloning & sequencing	9	2004	3	2005	Jones 2008 ProcRSocB Community change in the endosymbionts of a coral after a bleaching event	ITS1 primers: symITSFP and SymITSRP, novel SSCP profiles were cloned and sequenced		symITSFP and SymITSRP
2098	Acropora millepora	ITS2	Cladocopium C3	C3		Miall Island	Central Indo-Pacific	Northeast Australian Shelf	Central and Southern GBR	0	3	-23.15	150.9	Direct from Pub	Direct from Pub	SSCP of ITS1, cloning & sequencing	9	2004	3	2005	Jones 2008 ProcRSocB Community change in the endosymbionts of a coral after a bleaching event	ITS1 primers: symITSFP and SymITSRP, novel SSCP profiles were cloned and sequenced		symITSFP and SymITSRP
2099	Acropora millepora	ITS2	Cladocopium C3	C3		Miall Island	Central Indo-Pacific	Northeast Australian Shelf	Central and Southern GBR	0	3	-23.15	150.9	Direct from Pub	Direct from Pub	SSCP of ITS1, cloning & sequencing	9	2004	3	2005	Jones 2008 ProcRSocB Community change in the endosymbionts of a coral after a bleaching event	ITS1 primers: symITSFP and SymITSRP, novel SSCP profiles were cloned and sequenced		symITSFP and SymITSRP
2100	Acropora millepora	ITS2	Cladocopium C3	C3		Miall Island	Central Indo-Pacific	Northeast Australian Shelf	Central and Southern GBR	0	3	-23.15	150.9	Direct from Pub	Direct from Pub	SSCP of ITS1, cloning & sequencing	9	2004	3	2005	Jones 2008 ProcRSocB Community change in the endosymbionts of a coral after a bleaching event	ITS1 primers: symITSFP and SymITSRP, novel SSCP profiles were cloned and sequenced		symITSFP and SymITSRP
2101	Acropora millepora	ITS2	Cladocopium C3	C3		Miall Island	Central Indo-Pacific	Northeast Australian Shelf	Central and Southern GBR	0	3	-23.15	150.9	Direct from Pub	Direct from Pub	SSCP of ITS1, cloning & sequencing	9	2004	3	2005	Jones 2008 ProcRSocB Community change in the endosymbionts of a coral after a bleaching event	ITS1 primers: symITSFP and SymITSRP, novel SSCP profiles were cloned and sequenced		symITSFP and SymITSRP
2102	Acropora millepora	ITS2	Cladocopium C3	C3		Miall Island	Central Indo-Pacific	Northeast Australian Shelf	Central and Southern GBR	0	3	-23.15	150.9	Direct from Pub	Direct from Pub	SSCP of ITS1, cloning & sequencing	9	2004	3	2005	Jones 2008 ProcRSocB Community change in the endosymbionts of a coral after a bleaching event	ITS1 primers: symITSFP and SymITSRP, novel SSCP profiles were cloned and sequenced		symITSFP and SymITSRP
2103	Acropora millepora	ITS2	Cladocopium C3	C3		Miall Island	Central Indo-Pacific	Northeast Australian Shelf	Central and Southern GBR	0	3	-23.15	150.9	Direct from Pub	Direct from Pub	SSCP of ITS1, cloning & sequencing	9	2004	3	2005	Jones 2008 ProcRSocB Community change in the endosymbionts of a coral after a bleaching event	ITS1 primers: symITSFP and SymITSRP, novel SSCP profiles were cloned and sequenced		symITSFP and SymITSRP
2104	Acropora millepora	ITS2	Cladocopium C3	C3		Miall Island	Central Indo-Pacific	Northeast Australian Shelf	Central and Southern GBR	0	3	-23.15	150.9	Direct from Pub	Direct from Pub	SSCP of ITS1, cloning & sequencing	9	2004	3	2005	Jones 2008 ProcRSocB Community change in the endosymbionts of a coral after a bleaching event	ITS1 primers: symITSFP and SymITSRP, novel SSCP profiles were cloned and sequenced		symITSFP and SymITSRP
2105	Acropora millepora	ITS2	Cladocopium C3	C3		Miall Island	Central Indo-Pacific	Northeast Australian Shelf	Central and Southern GBR	0	3	-23.15	150.9	Direct from Pub	Direct from Pub	SSCP of ITS1, cloning & sequencing	9	2004	3	2005	Jones 2008 ProcRSocB Community change in the endosymbionts of a coral after a bleaching event	ITS1 primers: symITSFP and SymITSRP, novel SSCP profiles were cloned and sequenced		symITSFP and SymITSRP
2106	Acropora millepora	ITS2	Cladocopium C3	C3		Miall Island	Central Indo-Pacific	Northeast Australian Shelf	Central and Southern GBR	0	3	-23.15	150.9	Direct from Pub	Direct from Pub	SSCP of ITS1, cloning & sequencing	9	2004	3	2005	Jones 2008 ProcRSocB Community change in the endosymbionts of a coral after a bleaching event	ITS1 primers: symITSFP and SymITSRP, novel SSCP profiles were cloned and sequenced		symITSFP and SymITSRP
2107	Acropora millepora	ITS2	Cladocopium C3	C3		Miall Island	Central Indo-Pacific	Northeast Australian Shelf	Central and Southern GBR	0	3	-23.15	150.9	Direct from Pub	Direct from Pub	SSCP of ITS1, cloning & sequencing	9	2004	3	2005	Jones 2008 ProcRSocB Community change in the endosymbionts of a coral after a bleaching event	ITS1 primers: symITSFP and SymITSRP, novel SSCP profiles were cloned and sequenced		symITSFP and SymITSRP
2108	Acropora millepora	ITS2	Cladocopium C3	C3		Miall Island	Central Indo-Pacific	Northeast Australian Shelf	Central and Southern GBR	0	3	-23.15	150.9	Direct from Pub	Direct from Pub	SSCP of ITS1, cloning & sequencing	9	2004	3	2005	Jones 2008 ProcRSocB Community change in the endosymbionts of a coral after a bleaching event	ITS1 primers: symITSFP and SymITSRP, novel SSCP profiles were cloned and sequenced		symITSFP and SymITSRP
2109	Acropora millepora	ITS2	Cladocopium C3	C3		Miall Island	Central Indo-Pacific	Northeast Australian Shelf	Central and Southern GBR	0	3	-23.15	150.9	Direct from Pub	Direct from Pub	SSCP of ITS1, cloning & sequencing	9	2004	3	2005	Jones 2008 ProcRSocB Community change in the endosymbionts of a coral after a bleaching event	ITS1 primers: symITSFP and SymITSRP, novel SSCP profiles were cloned and sequenced		symITSFP and SymITSRP
2110	Acropora millepora	ITS2	Cladocopium C3	C3		Miall Island	Central Indo-Pacific	Northeast Australian Shelf	Central and Southern GBR	0	3	-23.15	150.9	Direct from Pub	Direct from Pub	SSCP of ITS1, cloning & sequencing	9	2004	3	2005	Jones 2008 ProcRSocB Community change in the endosymbionts of a coral after a bleaching event	ITS1 primers: symITSFP and SymITSRP, novel SSCP profiles were cloned and sequenced		symITSFP and SymITSRP
2111	Acropora millepora	ITS2	Cladocopium C3	C3		Miall Island	Central Indo-Pacific	Northeast Australian Shelf	Central and Southern GBR	0	3	-23.15	150.9	Direct from Pub	Direct from Pub	SSCP of ITS1, cloning & sequencing	9	2004	3	2005	Jones 2008 ProcRSocB Community change in the endosymbionts of a coral after a bleaching event	ITS1 primers: symITSFP and SymITSRP, novel SSCP profiles were cloned and sequenced		symITSFP and SymITSRP
2112	Acropora millepora	ITS2	Cladocopium C3	C3		Miall Island	Central Indo-Pacific	Northeast Australian Shelf	Central and Southern GBR	0	3	-23.15	150.9	Direct from Pub	Direct from Pub	SSCP of ITS1, cloning & sequencing	9	2004	3	2005	Jones 2008 ProcRSocB Community change in the endosymbionts of a coral after a bleaching event	ITS1 primers: symITSFP and SymITSRP, novel SSCP profiles were cloned and sequenced		symITSFP and SymITSRP
2113	Acropora millepora	ITS2	Cladocopium C3	C3		Miall Island	Central Indo-Pacific	Northeast Australian Shelf	Central and Southern GBR	0	3	-23.15	150.9	Direct from Pub	Direct from Pub	SSCP of ITS1, cloning & sequencing	9	2004	3	2005	Jones 2008 ProcRSocB Community change in the endosymbionts of a coral after a bleaching event	ITS1 primers: symITSFP and SymITSRP, novel SSCP profiles were cloned and sequenced		symITSFP and SymITSRP
2114	Acropora millepora	ITS2	Cladocopium C3	C3		Miall Island	Central Indo-Pacific	Northeast Australian Shelf	Central and Southern GBR	0	3	-23.15	150.9	Direct from Pub	Direct from Pub	SSCP of ITS1, cloning & sequencing	9	2004	3	2005	Jones 2008 ProcRSocB Community change in the endosymbionts of a coral after a bleaching event	ITS1 primers: symITSFP and SymITSRP, novel SSCP profiles were cloned and sequenced		symITSFP and SymITSRP
2115	Acropora millepora	ITS2	Cladocopium C3	C3		Miall Island	Central Indo-Pacific	Northeast Australian Shelf	Central and Southern GBR	0	3	-23.15	150.9	Direct from Pub	Direct from Pub	SSCP of ITS1, cloning & sequencing	9	2004	3	2005	Jones 2008 ProcRSocB Community change in the endosymbionts of a coral after a bleaching event	ITS1 primers: symITSFP and SymITSRP, novel SSCP profiles were cloned and sequenced		symITSFP and SymITSRP
2116	Acropora millepora	ITS2	Cladocopium C3	C3		Miall Island	Central Indo-Pacific	Northeast Australian Shelf	Central and Southern GBR	0	3	-23.15	150.9	Direct from Pub	Direct from Pub	SSCP of ITS1, cloning & sequencing	9	2004	3	2005	Jones 2008 ProcRSocB Community change in the endosymbionts of a coral after a bleaching event	ITS1 primers: symITSFP and SymITSRP, novel SSCP profiles were cloned and sequenced		symITSFP and SymITSRP
2117	Acropora millepora	ITS2	Cladocopium C3	C3		Miall Island	Central Indo-Pacific	Northeast Australian Shelf	Central and Southern GBR	0	3	-23.15	150.9	Direct from Pub	Direct from Pub	SSCP of ITS1, cloning & sequencing	9	2004	3	2005	Jones 2008 ProcRSocB Community change in the endosymbionts of a coral after a bleaching event	ITS1 primers: symITSFP and SymITSRP, novel SSCP profiles were cloned and sequenced		symITSFP and SymITSRP
2118	Acropora millepora	ITS2	Cladocopium C3	C3		Miall Island	Central Indo-Pacific	Northeast Australian Shelf	Central and Southern GBR	0	3	-23.15	150.9	Direct from Pub	Direct from Pub	SSCP of ITS1, cloning & sequencing	9	2004	3	2005	Jones 2008 ProcRSocB Community change in the endosymbionts of a coral after a bleaching event	ITS1 primers: symITSFP and SymITSRP, novel SSCP profiles were cloned and sequenced		symITSFP and SymITSRP
2119	Acropora millepora	ITS2	Cladocopium C3	C3		Miall Island	Central Indo-Pacific	Northeast Australian Shelf	Central and Southern GBR	0	3	-23.15	150.9	Direct from Pub	Direct from Pub	SSCP of ITS1, cloning & sequencing	9	2004	3	2005	Jones 2008 ProcRSocB Community change in the endosymbionts of a coral after a bleaching event	ITS1 primers: symITSFP and SymITSRP, novel SSCP profiles were cloned and sequenced		symITSFP and SymITSRP
2120	Acropora millepora	ITS2	Cladocopium C3	C3		Miall Island	Central Indo-Pacific	Northeast Australian Shelf	Central and Southern GBR	0	3	-23.15	150.9	Direct from Pub	Direct from Pub	SSCP of ITS1, cloning & sequencing	9	2004	3	2005	Jones 2008 ProcRSocB Community change in the endosymbionts of a coral after a bleaching event	ITS1 primers: symITSFP and SymITSRP, novel SSCP profiles were cloned and sequenced		symITSFP and SymITSRP
2121	Acropora millepora	ITS2	Cladocopium C3	C3		Miall Island	Central Indo-Pacific	Northeast Australian Shelf	Central and Southern GBR	0	3	-23.15	150.9	Direct from Pub	Direct from Pub	SSCP of ITS1, cloning & sequencing	9	2004	3	2005	Jones 2008 ProcRSocB Community change in the endosymbionts of a coral after a bleaching event	ITS1 primers: symITSFP and SymITSRP, novel SSCP profiles were cloned and sequenced		symITSFP and SymITSRP
2122	Acropora millepora	ITS2	Cladocopium C3	C3		Miall Island	Central Indo-Pacific	Northeast Australian Shelf	Central and Southern GBR	0	3	-23.15	150.9	Direct from Pub	Direct from Pub	SSCP of ITS1, cloning & sequencing	9	2004	3	2005	Jones 2008 ProcRSocB Community change in the endosymbionts of a coral after a bleaching event	ITS1 primers: symITSFP and SymITSRP, novel SSCP profiles were cloned and sequenced		symITSFP and SymITSRP
2123	Acropora millepora	ITS2	Cladocopium C3	C3		Miall Island	Central Indo-Pacific	Northeast Australian Shelf	Central and Southern GBR	0	3	-23.15	150.9	Direct from Pub	Direct from Pub	SSCP of ITS1, cloning & sequencing	9	2004	3	2005	Jones 2008 ProcRSocB Community change in the endosymbionts of a coral after a bleaching event	ITS1 primers: symITSFP and SymITSRP, novel SSCP profiles were cloned and sequenced		symITSFP and SymITSRP
2124	Acropora millepora	ITS2	Cladocopium C3	C3		Miall Island	Central Indo-Pacific	Northeast Australian Shelf	Central and Southern GBR	0	3	-23.15	150.9	Direct from Pub	Direct from Pub	SSCP of ITS1, cloning & sequencing	9	2004	3	2005	Jones 2008 ProcRSocB Community change in the endosymbionts of a coral after a bleaching event	ITS1 primers: symITSFP and SymITSRP, novel SSCP profiles were cloned and sequenced		symITSFP and SymITSRP
2125	Acropora millepora	ITS2	Cladocopium C3	C3		Miall Island	Central Indo-Pacific	Northeast Australian Shelf	Central and Southern GBR	0	3	-23.15	150.9	Direct from Pub	Direct from Pub	SSCP of ITS1, cloning & sequencing	9	2004	3	2005	Jones 2008 ProcRSocB Community change in the endosymbionts of a coral after a bleaching event	ITS1 primers: symITSFP and SymITSRP, novel SSCP profiles were cloned and sequenced		symITSFP and SymITSRP
2126	Acropora millepora	ITS2	Cladocopium C3	C3		Miall Island	Central Indo-Pacific	Northeast Australian Shelf	Central and Southern GBR	0	3	-23.15	150.9	Direct from Pub	Direct from Pub	SSCP of ITS1, cloning & sequencing	9	2004	3	2005	Jones 2008 ProcRSocB Community change in the endosymbionts of a coral after a bleaching event	ITS1 primers: symITSFP and SymITSRP, novel SSCP profiles were cloned and sequenced		symITSFP and SymITSRP
2127	Acropora millepora	ITS2	Cladocopium C3	C3		Miall Island	Central Indo-Pacific	Northeast Australian Shelf	Central and Southern GBR	0	3	-23.15	150.9	Direct from Pub	Direct from Pub	SSCP of ITS1, cloning & sequencing	9	2004	3	2005	Jones 2008 ProcRSocB Community change in the endosymbionts of a coral after a bleaching event	ITS1 primers: symITSFP and SymITSRP, novel SSCP profiles were cloned and sequenced		symITSFP and SymITSRP
2128	Acropora millepora	ITS2	Cladocopium C3	C3		Miall Island	Central Indo-Pacific	Northeast Australian Shelf	Central and Southern GBR	0	3	-23.15	150.9	Direct from Pub	Direct from Pub	SSCP of ITS1, cloning & sequencing	9	2004	3	2005	Jones 2008 ProcRSocB Community change in the endosymbionts of a coral after a bleaching event	ITS1 primers: symITSFP and SymITSRP, novel SSCP profiles were cloned and sequenced		symITSFP and SymITSRP
2129	Acropora millepora	ITS2	Cladocopium C3	C3		Miall Island	Central Indo-Pacific	Northeast Australian Shelf	Central and Southern GBR	0	3	-23.15	150.9	Direct from Pub	Direct from Pub	SSCP of ITS1, cloning & sequencing	9	2004	3	2005	Jones 2008 ProcRSocB Community change in the endosymbionts of a coral after a bleaching event	ITS1 primers: symITSFP and SymITSRP, novel SSCP profiles were cloned and sequenced		symITSFP and SymITSRP
2130	Acropora millepora	ITS2	Cladocopium C3	C3		Miall Island	Central Indo-Pacific	Northeast Australian Shelf	Central and Southern GBR	0	3	-23.15	150.9	Direct from Pub	Direct from Pub	SSCP of ITS1, cloning & sequencing	9	2004	3	2005	Jones 2008 ProcRSocB Community change in the endosymbionts of a coral after a bleaching event	ITS1 primers: symITSFP and SymITSRP, novel SSCP profiles were cloned and sequenced		symITSFP and SymITSRP
2131	Acropora millepora	ITS2	Cladocopium C3	C3		Miall Island	Central Indo-Pacific	Northeast Australian Shelf	Central and Southern GBR	0	3	-23.15	150.9	Direct from Pub	Direct from Pub	SSCP of ITS1, cloning & sequencing	9	2004	3	2005	Jones 2008 ProcRSocB Community change in the endosymbionts of a coral after a bleaching event	ITS1 primers: symITSFP and SymITSRP, novel SSCP profiles were cloned and sequenced		symITSFP and SymITSRP
2132	Acropora millepora	ITS2	Cladocopium C3	C3		Miall Island	Central Indo-Pacific	Northeast Australian Shelf	Central and Southern GBR	0	3	-23.15	150.9	Direct from Pub	Direct from Pub	SSCP of ITS1, cloning & sequencing	9	2004	3	2005	Jones 2008 ProcRSocB Community change in the endosymbionts of a coral after a bleaching event	ITS1 primers: symITSFP and SymITSRP, novel SSCP profiles were cloned and sequenced		symITSFP and SymITSRP
2133	Acropora millepora	ITS2	Cladocopium C3	C3		Miall Island	Central Indo-Pacific	Northeast Australian Shelf	Central and Southern GBR	0	3	-23.15	150.9	Direct from Pub	Direct from Pub	SSCP of ITS1, cloning & sequencing	9	2004	3	2005	Jones 2008 ProcRSocB Community change in the endosymbionts of a coral after a bleaching event	ITS1 primers: symITSFP and SymITSRP, novel SSCP profiles were cloned and sequenced		symITSFP and SymITSRP
2134	Acropora millepora	ITS2	Cladocopium C3	C3		Miall Island	Central Indo-Pacific	Northeast Australian Shelf	Central and Southern GBR	0	3	-23.15	150.9	Direct from Pub	Direct from Pub	SSCP of ITS1, cloning & sequencing	9	2004	3	2005	Jones 2008 ProcRSocB Community change in the endosymbionts of a coral after a bleaching event	ITS1 primers: symITSFP and SymITSRP, novel SSCP profiles were cloned and sequenced		symITSFP and SymITSRP
2135	Acropora millepora	ITS2	Cladocopium C3	C3		Miall Island	Central Indo-Pacific	Northeast Australian Shelf	Central and Southern GBR	0	3	-23.15	150.9	Direct from Pub	Direct from Pub	SSCP of ITS1, cloning & sequencing	9	2004	3	2005	Jones 2008 ProcRSocB Community change in the endosymbionts of a coral after a bleaching event	ITS1 primers: symITSFP and SymITSRP, novel SSCP profiles were cloned and sequenced		symITSFP and SymITSRP
2136	Acropora millepora	ITS2	Cladocopium C3	C3		Miall Island	Central Indo-Pacific	Northeast Australian Shelf	Central and Southern GBR	0	3	-23.15	150.9	Direct from Pub	Direct from Pub	SSCP of ITS1, cloning & sequencing	9	2004	3	2005	Jones 2008 ProcRSocB Community change in the endosymbionts of a coral after a bleaching event	ITS1 primers: symITSFP and SymITSRP, novel SSCP profiles were cloned and sequenced		symITSFP and SymITSRP
2137	Acropora millepora	ITS2	Cladocopium C3	C3		Miall Island	Central Indo-Pacific	Northeast Australian Shelf	Central and Southern GBR	0	3	-23.15	150.9	Direct from Pub	Direct from Pub	SSCP of ITS1, cloning & sequencing	9	2004	3	2005	Jones 2008 ProcRSocB Community change in the endosymbionts of a coral after a bleaching event	ITS1 primers: symITSFP and SymITSRP, novel SSCP profiles were cloned and sequenced		symITSFP and SymITSRP
2138	Acropora millepora	ITS2	Cladocopium C3	C3		Miall Island	Central Indo-Pacific	Northeast Australian Shelf	Central and Southern GBR	0	3	-23.15	150.9	Direct from Pub	Direct from Pub	SSCP of ITS1, cloning & sequencing	9	2004	3	2005	Jones 2008 ProcRSocB Community change in the endosymbionts of a coral after a bleaching event	ITS1 primers: symITSFP and SymITSRP, novel SSCP profiles were cloned and sequenced		symITSFP and SymITSRP
2139	Acropora millepora	ITS2	Cladocopium C3	C3		Miall Island	Central Indo-Pacific	Northeast Australian Shelf	Central and Southern GBR	0	3	-23.15	150.9	Direct from Pub	Direct from Pub	SSCP of ITS1, cloning & sequencing	9	2004	3	2005	Jones 2008 ProcRSocB Community change in the endosymbionts of a coral after a bleaching event	ITS1 primers: symITSFP and SymITSRP, novel SSCP profiles were cloned and sequenced		symITSFP and SymITSRP
2140	Acropora millepora	ITS2	Cladocopium C3	C3		Miall Island	Central Indo-Pacific	Northeast Australian Shelf	Central and Southern GBR	0	3	-23.15	150.9	Direct from Pub	Direct from Pub	SSCP of ITS1, cloning & sequencing	9	2004	3	2005	Jones 2008 ProcRSocB Community change in the endosymbionts of a coral after a bleaching event	ITS1 primers: symITSFP and SymITSRP, novel SSCP profiles were cloned and sequenced		symITSFP and SymITSRP
2141	Acropora millepora	ITS2	Cladocopium C3	C3		Miall Island	Central Indo-Pacific	Northeast Australian Shelf	Central and Southern GBR	0	3	-23.15	150.9	Direct from Pub	Direct from Pub	SSCP of ITS1, cloning & sequencing	9	2004	3	2005	Jones 2008 ProcRSocB Community change in the endosymbionts of a coral after a bleaching event	ITS1 primers: symITSFP and SymITSRP, novel SSCP profiles were cloned and sequenced		symITSFP and SymITSRP
2142	Acropora millepora	ITS2	Cladocopium C3	C3		Miall Island	Central Indo-Pacific	Northeast Australian Shelf	Central and Southern GBR	0	3	-23.15	150.9	Direct from Pub	Direct from Pub	SSCP of ITS1, cloning & sequencing	9	2004	3	2005	Jones 2008 ProcRSocB Community change in the endosymbionts of a coral after a bleaching event	ITS1 primers: symITSFP and SymITSRP, novel SSCP profiles were cloned and sequenced		symITSFP and SymITSRP
2143	Acropora millepora	ITS2	Cladocopium C3	C3		Miall Island	Central Indo-Pacific	Northeast Australian Shelf	Central and Southern GBR	0	3	-23.15	150.9	Direct from Pub	Direct from Pub	SSCP of ITS1, cloning & sequencing	9	2004	3	2005	Jones 2008 ProcRSocB Community change in the endosymbionts of a coral after a bleaching event	ITS1 primers: symITSFP and SymITSRP, novel SSCP profiles were cloned and sequenced		symITSFP and SymITSRP
2144	Acropora millepora	ITS2	Cladocopium C3	C3		Miall Island	Central Indo-Pacific	Northeast Australian Shelf	Central and Southern GBR	0	3	-23.15	150.9	Direct from Pub	Direct from Pub	SSCP of ITS1, cloning & sequencing	9	2004	3	2005	Jones 2008 ProcRSocB Community change in the endosymbionts of a coral after a bleaching event	ITS1 primers: symITSFP and SymITSRP, novel SSCP profiles were cloned and sequenced		symITSFP and SymITSRP
2145	Acropora millepora	ITS2	Cladocopium C3	C3		Miall Island	Central Indo-Pacific	Northeast Australian Shelf	Central and Southern GBR	0	3	-23.15	150.9	Direct from Pub	Direct from Pub	SSCP of ITS1, cloning & sequencing	9	2004	3	2005	Jones 2008 ProcRSocB Community change in the endosymbionts of a coral after a bleaching event	ITS1 primers: symITSFP and SymITSRP, novel SSCP profiles were cloned and sequenced		symITSFP and SymITSRP
2146	Acropora millepora	ITS2	Cladocopium C3	C3		Miall Island	Central Indo-Pacific	Northeast Australian Shelf	Central and Southern GBR	0	3	-23.15	150.9	Direct from Pub	Direct from Pub	SSCP of ITS1, cloning & sequencing	9	2004	3	2005	Jones 2008 ProcRSocB Community change in the endosymbionts of a coral after a bleaching event	ITS1 primers: symITSFP and SymITSRP, novel SSCP profiles were cloned and sequenced		symITSFP and SymITSRP
2147	Acropora millepora	ITS2	Cladocopium C3	C3		Miall Island	Central Indo-Pacific	Northeast Australian Shelf	Central and Southern GBR	0	3	-23.15	150.9	Direct from Pub	Direct from Pub	SSCP of ITS1, cloning & sequencing	9	2004	3	2005	Jones 2008 ProcRSocB Community change in the endosymbionts of a coral after a bleaching event	ITS1 primers: symITSFP and SymITSRP, novel SSCP profiles were cloned and sequenced		symITSFP and SymITSRP
2148	Acropora millepora	ITS2	Cladocopium C3	C3		Miall Island	Central Indo-Pacific	Northeast Australian Shelf	Central and Southern GBR	0	3	-23.15	150.9	Direct from Pub	Direct from Pub	SSCP of ITS1, cloning & sequencing	9	2004	3	2005	Jones 2008 ProcRSocB Community change in the endosymbionts of a coral after a bleaching event	ITS1 primers: symITSFP and SymITSRP, novel SSCP profiles were cloned and sequenced		symITSFP and SymITSRP
2149	Acropora millepora	ITS2	Cladocopium C3	C3		Miall Island	Central Indo-Pacific	Northeast Australian Shelf	Central and Southern GBR	0	3	-23.15	150.9	Direct from Pub	Direct from Pub	SSCP of ITS1, cloning & sequencing	9	2004	3	2005	Jones 2008 ProcRSocB Community change in the endosymbionts of a coral after a bleaching event	ITS1 primers: symITSFP and SymITSRP, novel SSCP profiles were cloned and sequenced		symITSFP and SymITSRP
2150	Acropora millepora	ITS2	Cladocopium C3	C3		Miall Island	Central Indo-Pacific	Northeast Australian Shelf	Central and Southern GBR	0	3	-23.15	150.9	Direct from Pub	Direct from Pub	SSCP of ITS1, cloning & sequencing	9	2004	3	2005	Jones 2008 ProcRSocB Community change in the endosymbionts of a coral after a bleaching event	ITS1 primers: symITSFP and SymITSRP, novel SSCP profiles were cloned and sequenced		symITSFP and SymITSRP
2151	Acropora millepora	ITS2	Cladocopium C3	C3		Miall Island	Central Indo-Pacific	Northeast Australian Shelf	Central and Southern GBR	0	3	-23.15	150.9	Direct from Pub	Direct from Pub	SSCP of ITS1, cloning & sequencing	9	2004	3	2005	Jones 2008 ProcRSocB Community change in the endosymbionts of a coral after a bleaching event	ITS1 primers: symITSFP and SymITSRP, novel SSCP profiles were cloned and sequenced		symITSFP and SymITSRP
2152	Acropora millepora	ITS2	Cladocopium C3	C3		Miall Island	Central Indo-Pacific	Northeast Australian Shelf	Central and Southern GBR	0	3	-23.15	150.9	Direct from Pub	Direct from Pub	SSCP of ITS1, cloning & sequencing	9	2004	3	2005	Jones 2008 ProcRSocB Community change in the endosymbionts of a coral after a bleaching event	ITS1 primers: symITSFP and SymITSRP, novel SSCP profiles were cloned and sequenced		symITSFP and SymITSRP
2153	Acropora millepora	ITS2	Cladocopium C3	C3		Miall Island	Central Indo-Pacific	Northeast Australian Shelf	Central and Southern GBR	0	3	-23.15	150.9	Direct from Pub	Direct from Pub	SSCP of ITS1, cloning & sequencing	9	2004	3	2005	Jones 2008 ProcRSocB Community change in the endosymbionts of a coral after a bleaching event	ITS1 primers: symITSFP and SymITSRP, novel SSCP profiles were cloned and sequenced		symITSFP and SymITSRP
2154	Acropora millepora	ITS2	Cladocopium C3	C3		Miall Island	Central Indo-Pacific	Northeast Australian Shelf	Central and Southern GBR	0	3	-23.15	150.9	Direct from Pub	Direct from Pub	SSCP of ITS1, cloning & sequencing	9	2004	3	2005	Jones 2008 ProcRSocB Community change in the endosymbionts of a coral after a bleaching event	ITS1 primers: symITSFP and SymITSRP, novel SSCP profiles were cloned and sequenced		symITSFP and SymITSRP
2155	Acropora millepora	ITS2	Cladocopium C3	C3		Miall Island	Central Indo-Pacific	Northeast Australian Shelf	Central and Southern GBR	0	3	-23.15	150.9	Direct from Pub	Direct from Pub	SSCP of ITS1, cloning & sequencing	9	2004	3	2005	Jones 2008 ProcRSocB Community change in the endosymbionts of a coral after a bleaching event	ITS1 primers: symITSFP and SymITSRP, novel SSCP profiles were cloned and sequenced		symITSFP and SymITSRP
2156	Acropora millepora	ITS2	Cladocopium C3	C3		Miall Island	Central Indo-Pacific	Northeast Australian Shelf	Central and Southern GBR	0	3	-23.15	150.9	Direct from Pub	Direct from Pub	SSCP of ITS1, cloning & sequencing	9	2004	3	2005	Jones 2008 ProcRSocB Community change in the endosymbionts of a coral after a bleaching event	ITS1 primers: symITSFP and SymITSRP, novel SSCP profiles were cloned and sequenced		symITSFP and SymITSRP
2157	Acropora millepora	ITS2	Cladocopium C3	C3		Miall Island	Central Indo-Pacific	Northeast Australian Shelf	Central and Southern GBR	0	3	-23.15	150.9	Direct from Pub	Direct from Pub	SSCP of ITS1, cloning & sequencing	9	2004	3	2005	Jones 2008 ProcRSocB Community change in the endosymbionts of a coral after a bleaching event	ITS1 primers: symITSFP and SymITSRP, novel SSCP profiles were cloned and sequenced		symITSFP and SymITSRP
2158	Acropora millepora	ITS2	Cladocopium C3	C3		Miall Island	Central Indo-Pacific	Northeast Australian Shelf	Central and Southern GBR	0	3	-23.15	150.9	Direct from Pub	Direct from Pub	SSCP of ITS1, cloning & sequencing	9	2004	3	2005	Jones 2008 ProcRSocB Community change in the endosymbionts of a coral after a bleaching event	ITS1 primers: symITSFP and SymITSRP, novel SSCP profiles were cloned and sequenced		symITSFP and SymITSRP
2159	Acropora millepora	ITS2	Cladocopium C3	C3		Miall Island	Central Indo-Pacific	Northeast Australian Shelf	Central and Southern GBR	0	3	-23.15	150.9	Direct from Pub	Direct from Pub	SSCP of ITS1, cloning & sequencing	9	2004	3	2005	Jones 2008 ProcRSocB Community change in the endosymbionts of a coral after a bleaching event	ITS1 primers: symITSFP and SymITSRP, novel SSCP profiles were cloned and sequenced		symITSFP and SymITSRP
2160	Acropora millepora	ITS2	Cladocopium C3	C3		Miall Island	Central Indo-Pacific	Northeast Australian Shelf	Central and Southern GBR	0	3	-23.15	150.9	Direct from Pub	Direct from Pub	SSCP of ITS1, cloning & sequencing	9	2004	3	2005	Jones 2008 ProcRSocB Community change in the endosymbionts of a coral after a bleaching event	ITS1 primers: symITSFP and SymITSRP, novel SSCP profiles were cloned and sequenced		symITSFP and SymITSRP
2161	Acropora millepora	ITS2	Cladocopium C3	C3		Miall Island	Central Indo-Pacific	Northeast Australian Shelf	Central and Southern GBR	0	3	-23.15	150.9	Direct from Pub	Direct from Pub	SSCP of ITS1, cloning & sequencing	9	2004	3	2005	Jones 2008 ProcRSocB Community change in the endosymbionts of a coral after a bleaching event	ITS1 primers: symITSFP and SymITSRP, novel SSCP profiles were cloned and sequenced		symITSFP and SymITSRP
2162	Acropora millepora	ITS2	Cladocopium C3	C3		Miall Island	Central Indo-Pacific	Northeast Australian Shelf	Central and Southern GBR	0	3	-23.15	150.9	Direct from Pub	Direct from Pub	SSCP of ITS1, cloning & sequencing	9	2004	3	2005	Jones 2008 ProcRSocB Community change in the endosymbionts of a coral after a bleaching event	ITS1 primers: symITSFP and SymITSRP, novel SSCP profiles were cloned and sequenced		symITSFP and SymITSRP
2163	Acropora millepora	ITS2	Cladocopium C3	C3		Miall Island	Central Indo-Pacific	Northeast Australian Shelf	Central and Southern GBR	0	3	-23.15	150.9	Direct from Pub	Direct from Pub	SSCP of ITS1, cloning & sequencing	9	2004	3	2005	Jones 2008 ProcRSocB Community change in the endosymbionts of a coral after a bleaching event	ITS1 primers: symITSFP and SymITSRP, novel SSCP profiles were cloned and sequenced		symITSFP and SymITSRP
2164	Acropora millepora	ITS2	Cladocopium C3	C3		Miall Island	Central Indo-Pacific	Northeast Australian Shelf	Central and Southern GBR	0	3	-23.15	150.9	Direct from Pub	Direct from Pub	SSCP of ITS1, cloning & sequencing	9	2004	3	2005	Jones 2008 ProcRSocB Community change in the endosymbionts of a coral after a bleaching event	ITS1 primers: symITSFP and SymITSRP, novel SSCP profiles were cloned and sequenced		symITSFP and SymITSRP
2165	Acropora millepora	ITS2	Cladocopium C3	C3		Miall Island	Central Indo-Pacific	Northeast Australian Shelf	Central and Southern GBR	0	3	-23.15	150.9	Direct from Pub	Direct from Pub	SSCP of ITS1, cloning & sequencing	9	2004	3	2005	Jones 2008 ProcRSocB Community change in the endosymbionts of a coral after a bleaching event	ITS1 primers: symITSFP and SymITSRP, novel SSCP profiles were cloned and sequenced		symITSFP and SymITSRP
2166	Acropora millepora	ITS2	Cladocopium C3	C3		Miall Island	Central Indo-Pacific	Northeast Australian Shelf	Central and Southern GBR	0	3	-23.15	150.9	Direct from Pub	Direct from Pub	SSCP of ITS1, cloning & sequencing	9	2004	3	2005	Jones 2008 ProcRSocB Community change in the endosymbionts of a coral after a bleaching event	ITS1 primers: symITSFP and SymITSRP, novel SSCP profiles were cloned and sequenced		symITSFP and SymITSRP
2167	Acropora millepora	ITS2	Cladocopium C3	C3		Miall Island	Central Indo-Pacific	Northeast Australian Shelf	Central and Southern GBR	0	3	-23.15	150.9	Direct from Pub	Direct from Pub	SSCP of ITS1, cloning & sequencing	9	2004	3	2005	Jones 2008 ProcRSocB Community change in the endosymbionts of a coral after a bleaching event	ITS1 primers: symITSFP and SymITSRP, novel SSCP profiles were cloned and sequenced		symITSFP and SymITSRP
2168	Acropora millepora	ITS2	Cladocopium C3	C3		Miall Island	Central Indo-Pacific	Northeast Australian Shelf	Central and Southern GBR	0	3	-23.15	150.9	Direct from Pub	Direct from Pub	SSCP of ITS1, cloning & sequencing	9	2004	3	2005	Jones 2008 ProcRSocB Community change in the endosymbionts of a coral after a bleaching event	ITS1 primers: symITSFP and SymITSRP, novel SSCP profiles were cloned and sequenced		symITSFP and SymITSRP
2169	Acropora millepora	ITS2	Cladocopium C3	C3		Miall Island	Central Indo-Pacific	Northeast Australian Shelf	Central and Southern GBR	0	3	-23.15	150.9	Direct from Pub	Direct from Pub	SSCP of ITS1, cloning & sequencing	9	2004	3	2005	Jones 2008 ProcRSocB Community change in the endosymbionts of a coral after a bleaching event	ITS1 primers: symITSFP and SymITSRP, novel SSCP profiles were cloned and sequenced		symITSFP and SymITSRP
2170	Acropora millepora	ITS2	Cladocopium C3	C3		Miall Island	Central Indo-Pacific	Northeast Australian Shelf	Central and Southern GBR	0	3	-23.15	150.9	Direct from Pub	Direct from Pub	SSCP of ITS1, cloning & sequencing	9	2004	3	2005	Jones 2008 ProcRSocB Community change in the endosymbionts of a coral after a bleaching event	ITS1 primers: symITSFP and SymITSRP, novel SSCP profiles were cloned and sequenced		symITSFP and SymITSRP
2171	Acropora millepora	ITS2	Cladocopium C3	C3		Miall Island	Central Indo-Pacific	Northeast Australian Shelf	Central and Southern GBR	0	3	-23.15	150.9	Direct from Pub	Direct from Pub	SSCP of ITS1, cloning & sequencing	9	2004	3	2005	Jones 2008 ProcRSocB Community change in the endosymbionts of a coral after a bleaching event	ITS1 primers: symITSFP and SymITSRP, novel SSCP profiles were cloned and sequenced		symITSFP and SymITSRP
2172	Acropora millepora	ITS2	Cladocopium C3	C3		Miall Island	Central Indo-Pacific	Northeast Australian Shelf	Central and Southern GBR	0	3	-23.15	150.9	Direct from Pub	Direct from Pub	SSCP of ITS1, cloning & sequencing	9	2004	3	2005	Jones 2008 ProcRSocB Community change in the endosymbionts of a coral after a bleaching event	ITS1 primers: symITSFP and SymITSRP, novel SSCP profiles were cloned and sequenced		symITSFP and SymITSRP
[truncated: 14,659 more rows]
