# Supplementary material for: Uncovering the role of Symbiodiniaceae assemblage composition and abundance in coral bleaching response by minimizing sampling and evolutionary biases
Source: BMC Microbiol. 2020 May 19;20:124. doi: 10.1186/s12866-020-01765-z (PMC7236918; doi:10.1186/s12866-020-01765-z)
Supplement: Supplementary file 2 — Additional file 2: Table S2. Species-specific raw-richness, rarefied-richness, raw-evenness, probability of interspecific encounter (PIE, Eq. 3, mathematically equivalent to the concept of rarefied-evenness), and number of records of Symbiodiniaceae assemblages associated with 123 coral species. Coral host species-specific bathymetric, latitudinal, and longitudinal ranges and bleaching response are included. [file 12866_2020_1765_MOESM2_ESM.xlsx]

## Sheet: Sheet1
Coral species	number of association records (from Table S1)	Phylotype raw-richness	Phylotype rarefied-richness R15	Phylotype raw eveness (assuming 0 when only 1 phylotype)	Probablity of Interspecific Encounter (PIE)	Coral species ∆ Depth	Coral species ∆ latitude	Coral species ∆ longitude	Bleaching Response Index (taxon-BRI), (Swain et al., 2016)
Acropora aspera	56	5	3.257	0.546924	0.46039	10	49.6746	53.5394	40.7532
Acropora cerealis	16	6	5.761	0.797411	0.75	16	49.2346	54.3592	48.6346
Acropora cervicornis	34	4	2.599	0.349515	0.222816	29	14.73	12.22	31.9292
Acropora cytherea	90	20	7.405	0.723857	0.794507	19	46.82	321.541	42.4835
Acropora digitifera	42	16	9.218	0.884904	0.9036	20	49.2346	301.837	31.8405
Acropora gemmifera	22	5	4.888	0.95382	0.809524	29	31.6525	112.885	71.0704
Acropora humilis	81	13	6.884	0.79398	0.83179	30	47.0592	316.807	51.1436
Acropora hyacinthus	64	18	7.894	0.7948	0.864087	12	41.2217	321.652	35.7108
Acropora latistella	30	9	6.903	0.879506	0.857471	30	26.3784	311.504	25.2696
Acropora loripes	16	5	4.937	0.841034	0.725	16	13.4523	107.756	9.38462
Acropora millepora	601	12	2.931	0.293254	0.299318	30	32.0958	104	34.1907
Acropora muricata	196	14	6.304	0.738718	0.802826	30	49.6646	321.552	29.2957
Acropora nasuta	85	19	7.894	0.78328	0.834174	30	48.7592	321.533	58.9352
Acropora palmata	22	1	1	0	0	9	11.91	28	25.8227
Acropora pulchra	17	7	6.64	0.879561	0.830882	5	29.674	283.819	8.39904
Acropora robusta	16	8	7.801	0.942607	0.9	30	49.5346	108.4	36.0422
Acropora samoensis	19	6	5.507	0.845973	0.777778	30	31.1073	59.6352	11.5385
Acropora secale	35	6	4.47	0.701142	0.633613	12	49.2346	112.885	31.0269
Acropora solitaryensis	26	3	2.815	0.802706	0.563077	12	28.8594	75.0307	29.8846
Acropora tenuis	129	10	4.676	0.666503	0.73062	17	49.2346	112.864	37.851
Acropora valida	33	12	8.359	0.886837	0.88447	23	49.2346	301.762	16.3526
Acropora yongei	16	3	2.933	0.755975	0.541667	8	53.4483	38.3042	15.9615
Agaricia agaricites	399	9	4.014	0.62976	0.711263	49	13.75	28	33.5081
Agaricia grahamae	140	4	3.966	1	0.755396	10	0	0	2.75
Agaricia humilis	224	7	3.449	0.63883	0.689862	29	8.87475	28	11
Agaricia lamarcki	460	10	6.13	0.836769	0.838903	40	4.67775	28.0816	25.5377
Agaricia tenuifolia	24	2	2	0.954434	0.48913	35	10.75	12.22	32.0833
Astrea curta	22	10	8.01	0.89061	0.883117	20	39.4073	329.883	10.2495
Coelastrea aspera	39	6	3.955	0.59922	0.533063	30	46.8599	112.697	14.271
Colpophyllia natans	129	18	8.103	0.823274	0.894501	29	11.8748	28	17.968
Cyphastrea microphthalma	26	7	6.127	0.907469	0.836923	29.7	44.1899	96.3772	6.54206
Cyphastrea ocellina	15	6	6	0.924539	0.847619	29	37.1592	214.807	5.5
Cyphastrea serailia	54	15	7.575	0.808227	0.859539	29	49.8217	312	8.64486
Diploastrea heliopora	39	6	4.792	0.805049	0.730094	30	36.7134	107.567	19.9393
Diploria clivosa	19	2	1.779	0.297472	0.105263	29	10.75	28	17.4854
Diploria labyrinthiformis	72	9	3.256	0.349733	0.304773	28	8.87475	28	12.2775
Diploria strigosa	82	8	3.138	0.367825	0.32701	29	8.87475	28	17.5694
Dipsastraea pallida	29	6	5.431	0.923547	0.820197	30	47.7743	102.4	55.0439
Echinophyllia aspera	28	8	6.452	0.862204	0.825397	62	30.8073	112.864	10.5597
Echinopora lamellosa	79	9	3.835	0.495717	0.464784	30	49.2346	112.885	8.8715
Eusmilia fastigiata	65	3	1.481	0.144486	0.0610577	37.5	11.8748	28	14.1258
Favia fragum	15	5	5	0.671398	0.561905	29	7.93	28	34.2149
Favites abdita	75	10	5.543	0.739399	0.768288	15	53.7331	311.504	26.0342
Fungia fungites	25	8	6.481	0.861155	0.83	30	31.9525	112.832	15.2082
Galaxea astreata	18	5	4.627	0.830108	0.732026	53	45.2	112.832	47.5871
Galaxea fascicularis	260	8	4.672	0.754172	0.762222	30	49.5346	112.885	25.4275
Gardineroseris planulata	27	12	9.138	0.935055	0.923077	30	31.9525	296.791	23.3085
Goniastrea australensis	26	5	4.128	0.699211	0.593846	17	15.6141	38.1348	22.8037
Goniastrea favulus	43	9	5.9	0.795321	0.796235	15	39.4073	312	14.9533
Goniastrea retiformis	32	8	5.804	0.810493	0.792339	30	31.1073	102.4	56.847
Goniastrea stelligera	32	6	4.646	0.751671	0.691532	29	49.5346	314.109	49.1758
Herpolitha limax	30	14	9.101	0.892532	0.908046	17	27.7894	296.679	0
Hydnophora exesa	34	10	7.552	0.90057	0.877005	30	49.5346	107.674	30.0652
Hydnophora microconos	39	5	4.303	0.866367	0.74359	30	31.9525	108.4	10.2189
Isopora cuneata	33	8	5.489	0.671886	0.625	29	18.2	306.701	18.9615
Isopora palifera	234	10	4.634	0.636277	0.699974	30	49.6513	108.4	40.8528
Leptastrea purpurea	46	15	7.488	0.769842	0.807729	29	40.6781	304.854	15.7305
Leptastrea transversa	24	7	5.853	0.807042	0.753623	29.8	44.1962	205.73	16.2734
Leptoria phrygia	21	8	6.736	0.820783	0.790476	29	41.5065	321.652	46.0088
Leptoseris cucullata	55	3	2.996	0.985775	0.668013	34	10.75	28	11
Leptoseris papyracea	21	6	5.634	0.934505	0.838095	8	0.1892	0.0727	71.5
Lithophyllon concinna	16	10	9.573	0.910434	0.9	19	0.02805	0.0672	6.32707
Lobactis scutaria	70	9	5.277	0.770132	0.785507	20	8.15663	296.838	2.75
Lobophyllia corymbosa	21	3	2.717	0.661745	0.452381	15	0.4167	0.0833	42.8269
Lobophyllia hemprichii	20	7	6.404	0.871439	0.810526	17	30.6743	107.869	50.4176
Madracis decactis	46	1	1	0	0	29	11.8748	28	2.66436
Madracis formosa	52	4	3.069	0.702945	0.581448	56	11.8748	19.0258	2.75
Madracis myriaster	110	2	1.996	0.902393	0.437865	29	4.87475	28	4.64
Madracis pharensis	262	2	1.996	0.920819	0.447837	55	4.87475	28	2.75
Madracis senaria	40	1	1	0	0	35	0	0	2.75
Meandrina meandrites	99	2	1.833	0.472189	0.183467	39	10.75	28.36	16.3917
Merulina ampliata	16	6	5.885	0.909962	0.833333	30	31.6525	112.697	58.6355
Montastraea cavernosa	228	10	4.534	0.624417	0.660832	59	11.8748	28.4416	14.4231
Montipora aequituberculata	59	7	4.274	0.692071	0.682642	30	45.2317	314.109	15.6111
Montipora capitata	654	27	6.401	0.625047	0.810627	20	30.1208	311.61	13.75
Montipora danae	19	12	10.537	0.96831	0.953216	9	44.8407	296.412	72.6488
Montipora digitata	80	6	3.233	0.472818	0.417722	6	45.3617	53.6294	18.5194
Montipora hispida	27	9	6.645	0.812161	0.803419	11	27.8525	296.815	61.5826
Montipora monasteriata	20	5	4.441	0.679994	0.568421	30	44.9317	112.885	31.4259
Montipora patula	59	4	3.541	0.841878	0.664524	20	5.68117	11.7328	13.75
Montipora peltiformis	19	5	4.713	0.718347	0.596491	11	41.4	107.764	45.3175
Montipora tuberculosa	23	8	6.884	0.862501	0.818182	12	26.1375	282.934	29.4328
Montipora undata	22	3	2.817	0.546295	0.329004	11	8.61724	93.985	43.4524
Mycedium elephantotus	17	6	5.632	0.818696	0.75	17	26.9442	107.869	13.8545
Mycetophyllia ferox	46	5	3.636	0.70345	0.628986	30	4.87475	28	11
Orbicella annularis	1093	20	7.216	0.726541	0.821019	29	14.759	28.4416	18.8928
Orbicella faveolata	312	15	6.541	0.737428	0.805796	29	12.9936	168.713	21.9589
Orbicella franksi	167	8	5.158	0.810695	0.798499	29	43.65	226.909	17.3707
Pachyseris rugosa	23	6	4.627	0.869931	0.747036	14	45.3715	107.539	21.7214
Pachyseris speciosa	37	12	7.882	0.874365	0.884384	61	44.7127	296.857	39.2761
Pavona cactus	35	10	6.405	0.730699	0.721008	29	4.179	219.652	31.5
Pavona decussata	48	4	3.066	0.649921	0.516844	30	45.5	102.891	5.42636
Pavona duerdeni	44	7	4.693	0.754554	0.736786	25	42.2781	311.871	47.5969
Pavona varians	146	19	7.628	0.78107	0.865281	30	49.5346	321.533	23.8498
Platygyra daedalea	134	12	6.681	0.816889	0.846257	30	50.1116	112.869	45.358
Platygyra pini	16	7	6.801	0.910122	0.858333	30	41.5065	103.4	38.3178
Platygyra verweyi	106	3	1.842	0.291466	0.158311	5	40.5761	48.0816	34.9065
Pleuractis paumotensis	23	15	11.318	0.957527	0.956522	5	1.19278	296.47	0
Pocillopora capitata	49	2	1.99	0.768281	0.355442	5	0	0	35.15
Pocillopora damicornis	1350	41	8.458	0.713183	0.894002	30	58.8444	328.702	42.2852
Pocillopora eydouxi	210	20	6.929	0.725688	0.836728	30	44.2346	315.655	21.8517
Pocillopora meandrina	288	31	8.396	0.737789	0.862877	30	49.6603	325.51	32.7729
Pocillopora verrucosa	353	19	5.38	0.557049	0.680708	30	49.3543	316.652	25.8155
Porites astreoides	502	29	5.93	0.57821	0.775596	36	25.066	222.502	16.005
Porites compressa	135	11	5.549	0.712049	0.735766	30	0.26334	0.52482	33.6875
Porites cylindrica	169	7	1.858	0.179666	0.12581	30	49.6646	112.885	28.9457
Porites harrisoni	89	7	4.398	0.640652	0.579418	5	1.63028	3.96514	11
Porites heronensis	18	4	3.828	0.837911	0.679739	4.5	0.083333	319.05	23.2143
Porites lichen	20	5	3.644	0.659518	0.5	30	49.5346	312	15.7923
Porites lobata	537	40	6.063	0.527823	0.666319	30	51.8108	292.677	35.791
Porites lutea	245	20	4.22	0.467654	0.60736	30	49.6646	301.764	24.5773
Porites panamensis	45	5	4.127	0.830246	0.719192	13.5	0.067611	0.054167	27.5978
Porites porites	155	14	6.464	0.745799	0.804692	29	11.8748	28	19.8193
Porites rus	174	13	3.213	0.317536	0.294067	29	49.5346	309.983	7.28142
Porites solida	24	14	10.287	0.925066	0.927536	29	4.07722	197.837	35.75
Psammocora contigua	31	10	6.364	0.732833	0.737634	30	41.2217	301.921	28.4167
Psammocora superficialis	31	11	7.441	0.842826	0.851613	12	41.8938	39.5898	5.5
Seriatopora hystrix	899	16	6.287	0.71242	0.819817	55	57.8346	312.127	61.462
Siderastrea radians	83	7	2.654	0.297287	0.226565	29	11.9303	28.0816	23.125
Siderastrea siderea	218	13	4.904	0.602965	0.688243	49	12.8548	28.4416	19.0494
Stephanocoenia intersepta	294	14	6.567	0.776731	0.846974	57.5	11.8748	28.0816	18.7674
Stylophora pistillata	738	19	7.149	0.74586	0.867282	30	57.8346	319.05	56.4195
Turbinaria peltata	19	2	1.797	0.297472	0.105263	2	45.2	37.8333	71.5
