# Supplementary material for: Uncovering the role of Symbiodiniaceae assemblage composition and abundance in coral bleaching response by minimizing sampling and evolutionary biases
Source: BMC Microbiol. 2020 May 19;20:124. doi: 10.1186/s12866-020-01765-z (PMC7236918; doi:10.1186/s12866-020-01765-z)
Supplement: Supplementary file 3 — Additional file 3: Table S3. Phylogenetic signal evaluation (Pagel’s λ) and correlation coefficients (r) of phylogenetically-corrected and uncorrected linear correlations throughout the study. Significant Pagel’s λ p-values (< 0.05, in bold) indicate phylogenetic bias in the distribution of linear regression residuals; and only when Pagel’s λ is significant, were phylogenetically-corrected regression results accepted for interpretation. The p-values of regressions indicated by Pagel’s λ test (either linear for non-significant λ, or phylogenetic for significant λ) are also in bold to indicate which significant result was accepted for interpretation. [file 12866_2020_1765_MOESM3_ESM.xlsx]

## Sheet: Table S3
Order of appearance in text	Tests performed	Linear r	Linear p	Pagel's λ p	Phylogenetic r	Phylogenetic p	number of species
1	raw-richness v. number of records	0.655952	1.80337e-16	0.501275	0.685	0	123
2	raw evenness v. number of records	-0.121832	0.179469	0.432876	-0.113	0.213	123
3	slope-at-end v. number of records	-0.337534	0.0473692	0.561045	-0.54	0.00081137	35
4	rarefied-richness R15 v. number of records	0.126896	0.161924	0.0603353	0.236	0.009	123
5	raw richness v. rarefied-richness R15	0.597444	2.99538e-13	0.00218722	0.578	0	123
6	raw evenness v. PIE	0.855161	2.49411e-36	1	0.718	0	123
7	PIE v. number of records	0.120745	0.183409	0.00619714	0.171	0.058	123
8	rarefied-richness R15 v. taxon-BRI	0.14827	0.101701	0.0423924	0.276	0.002	123
9	rarefied-richness R20 v. taxon-BRI	0.149928	0.126871	0.00545614	0.281	0.004	105
10	rarefied-richness R30 v. taxon-BRI	0.309372	0.00494853	0.0199034	0.262	0.018	81
11	rarefied-richness R40v. taxon-BRI	0.423087	0.000445923	0.0394376	0.325	0.008	65
12	rarefied-richness R50 v. taxon-BRI	0.436451	0.000864708	0.0963486	0.432	0	55
13	rarefied-richness R60 v. taxon-BRI	0.466265	0.000733632	1	0.428	0.002	49
14	PIE v. taxon-BRI	0.141506	0.118473	0.0101774	0.182	0.044	123
